# Supplementary material for: Comparative Transcriptomic Analysis Provides Novel Insights into the Blanched Stem of Oenanthe javanica
Source: MDPI journal article supplement (doi:10.3390/plants10112484), 2021-11-17
Supplement: s1 [file s1]

## Supplementary Figures

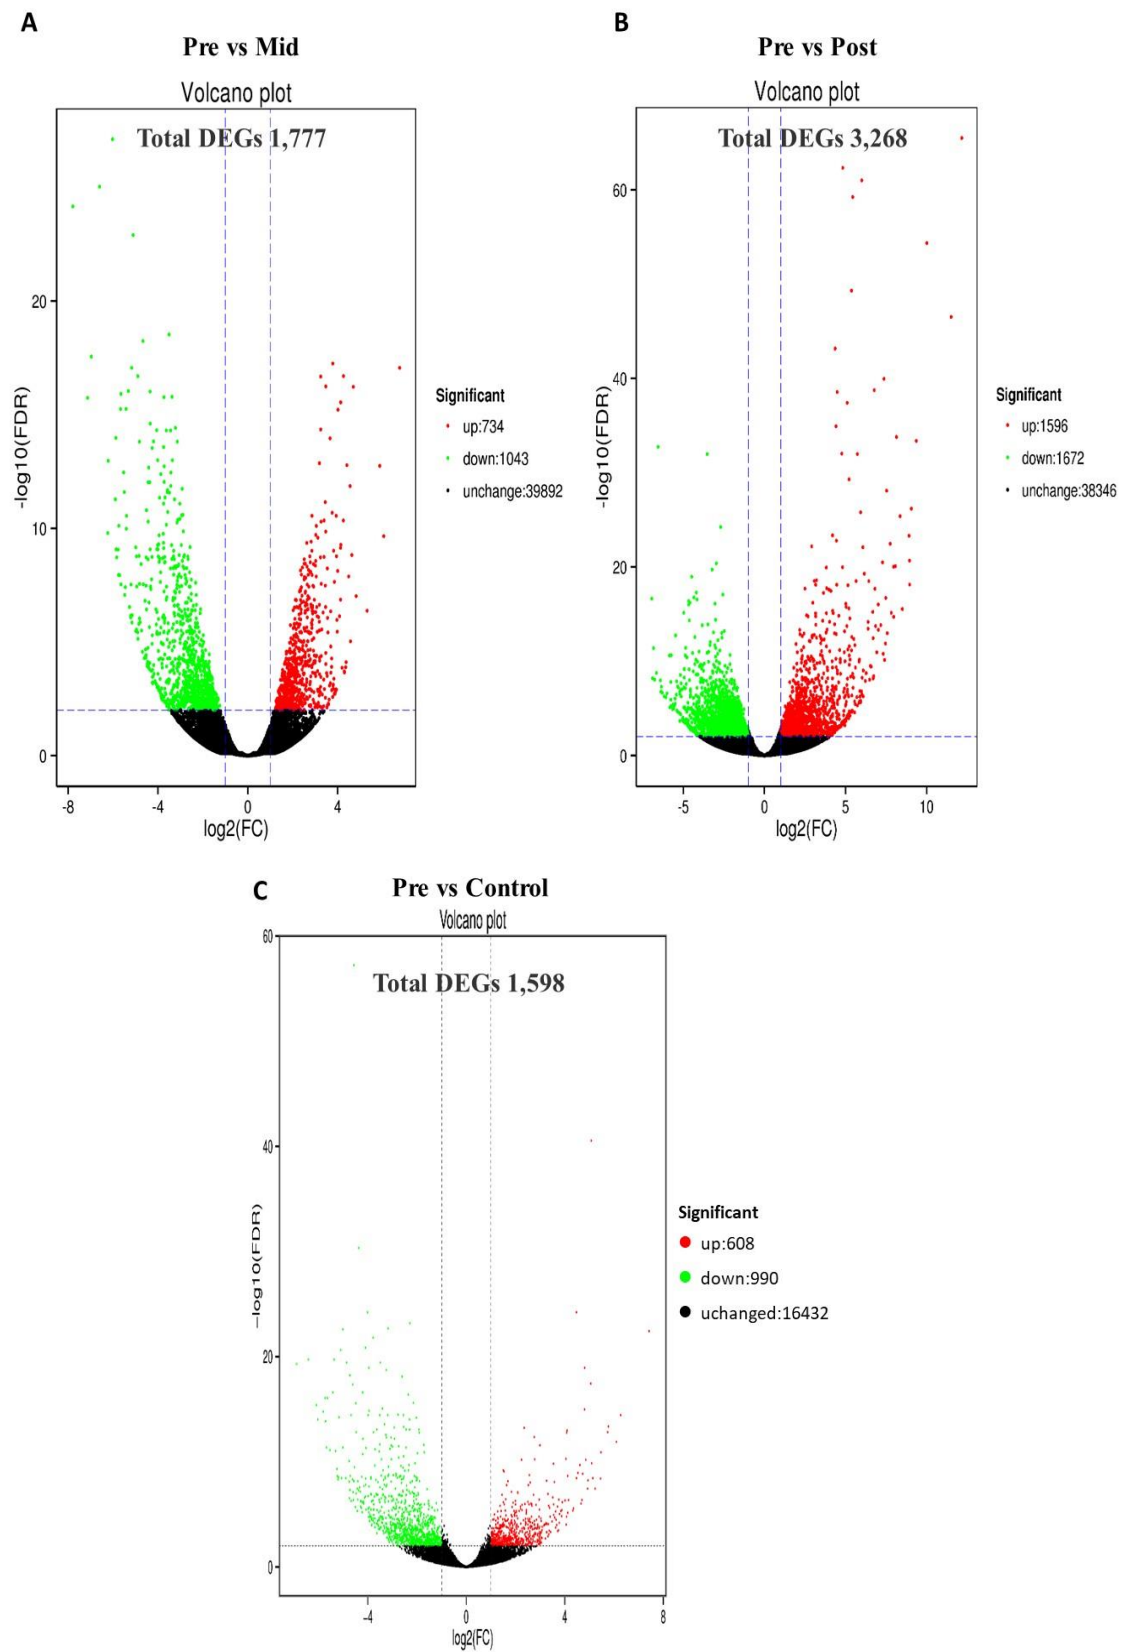

**Figure S1.** Volcano plot of differentially expressed genes (DEGs) in the stem of water dropwort under blanching treatment. A) Pre vs mid-blanching, B) pre vs post-blanching, and C) pre vs control conditions.

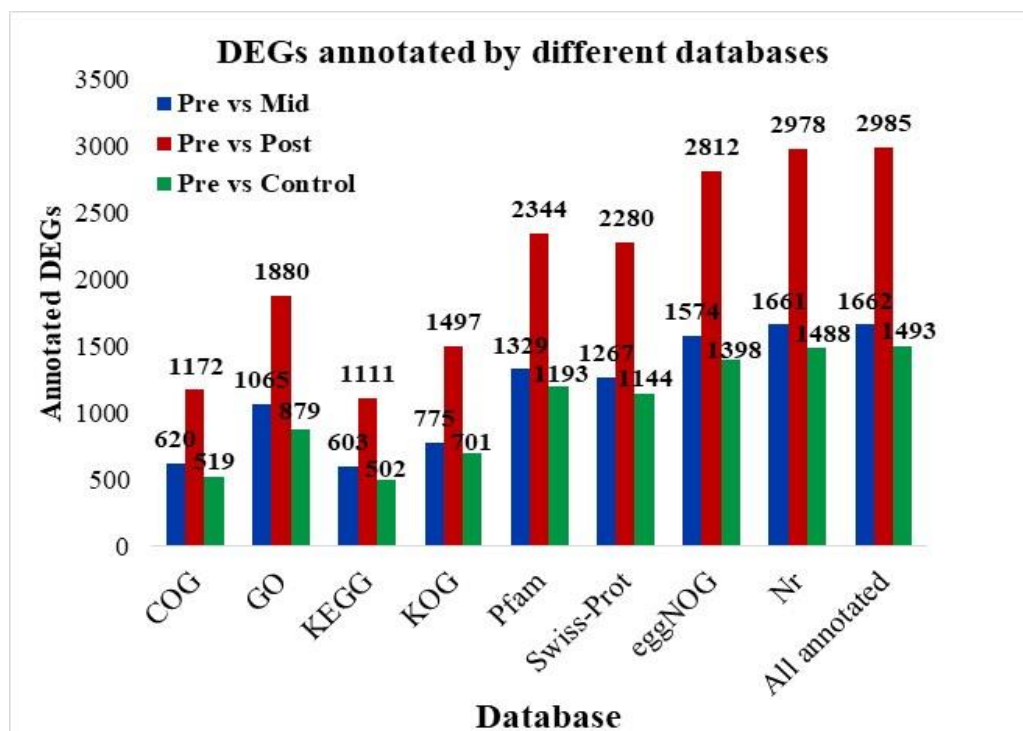

**Figure S2.** Functional annotations of DEGs against public databases.
