# Supplementary material for: Comparative Transcriptomic Analysis Provides Novel Insights into the Blanched Stem of Oenanthe javanica
Source: Plants (Basel). 2021 Nov 17;10(11):2484. doi: 10.3390/plants10112484 (PMC8625949; doi:10.3390/plants10112484)
Supplement: Supplementary file 1 [file plants-10-02484-s001.zip]

Archive with 7 entries (7 files):
- Supplementary Figures.pdf
- Supplementary table 2.xlsx
- Supplementary table 3 DEGs.xlsx
- Supplementary table 5 KEGG pathways.xlsx
- Supplementary table 6 TFs.xlsx
- Supplemntray table 4 GO ..xlsx
- Suppplemenatry table 1 PCR primers.xlsx
