# Supplementary material for: Comparative Transcriptomic Analysis Provides Novel Insights into the Blanched Stem of Oenanthe javanica
Source: Plants (Basel). 2021 Nov 17;10(11):2484. doi: 10.3390/plants10112484 (PMC8625949; doi:10.3390/plants10112484)
Supplement: Supplementary file 1 [file plants-10-02484-s001.zip › Supplementary table 2.xlsx]

## Sheet:  mapping transcriptome reads 
	Summary of mapping transcriptome reads to the reference sequence
Sample-ID	Sample Description	Clean Reads	Mapped Reads	Mapped Ratio	GC Content	%≥Q30
JB-18-1-1	Jianglingye Before	21600794	17391915	0.8052	0.4487	0.9498
JB-18-1-2	Jianglingye Before	25612201	20312751	0.7931	0.4494	0.9438
JB-18-1-3	Jianglingye Before	22530967	18085998	0.8027	0.4505	0.9464
JM-18-1-1	Jianglingye Mid	25114899	20381439	0.8115	0.4461	0.9508
JM-18-1-2	Jianglingye Mid	22876405	18551963	0.811	0.4435	0.954
JM-18-1-3	Jianglingye Mid	21130990	17007792	0.8049	0.4461	0.949
JP-18-1-1	Jianglingye Post	22345711	18067102	0.8085	0.4568	0.943
JP-18-1-2	Jianglingye Post	33720950	27080879	0.8031	0.4515	0.9441
JP-18-1-3	Jianglingye Post	22969712	18410625	0.8015	0.4481	0.9413
JC-18-1-1	Jianglingye Control	21152875	16809229	0.7947	0.4523	0.941
JC-18-1-2	Jianglingye Control	26356907	20730605	0.7865	0.4429	0.9399
JC-18-1-3	Jianglingye Control	23925527	19074078	0.7972	0.4518	0.9358

## Sheet: transcriptomic assembly
Summary of water dropwort transcriptomic assembly
Length Range	Transcript	Unigene
200-300	25,561 (11.36%)	19,481 (31.25%)
300-500	24,168 (10.74%)	13,561 (21.75%)
500-1000	41,492 (18.45%)	11,725 (18.81%)
1000-2000	72,947 (32.43%)	9,608 (15.41%)
2000+	60,758 (27.01%)	7,961 (12.77%)
Total Number	224926	62336
Total Length	332310388	56136424
N50 Length	2102	1717
Mean Length	1477.42	900.55

## Sheet: annotations of unigenes
Functional annotations of unigenes against public databases
Database	Annotated unigenes	Percentage (%)	300 ≤ length < 1000 nt	length ≥ 1000 nt
COG	8946	14.35	1790	6001
GO	17424	27.95	4876	9911
KEGG	11236	18.02	3197	6240
KOG	15893	25.5	4284	9348
Pfam	19817	31.79	4874	12885
Swiss-Prot	20661	33.14	5875	12072
eggNOG	26961	43.25	7909	15313
Nr	30115	48.31	9599	15893
Al annotated	30666	49.19	9755	15909
