# Supplementary material for: Comparative Transcriptomic Analysis Provides Novel Insights into the Blanched Stem of Oenanthe javanica
Source: Plants (Basel). 2021 Nov 17;10(11):2484. doi: 10.3390/plants10112484 (PMC8625949; doi:10.3390/plants10112484)
Supplement: Supplementary file 1 [file plants-10-02484-s001.zip › Supplementary table 3 DEGs.xlsx]

## Sheet: Pre vs Mid DEGs
#ID	JB-18-1-1_Count	JB-18-1-2_Count	JB-18-1-3_Count	JM-18-1-1_Count	JM-18-1-2_Count	JM-18-1-3_Count	JB-18-1-1_FPKM	JB-18-1-2_FPKM	JB-18-1-3_FPKM	JM-18-1-1_FPKM	JM-18-1-2_FPKM	JM-18-1-3_FPKM	FDR	log2FC	regulated	COG_class	COG_class_annotation	GO_annotation	KEGG_annotation	KOG_class	KOG_class_annotation	Pfam_annotation	Swissprot_annotation	eggNOG_class	eggNOG_class_annotation	nr_annotation
c38778.graph_c1	81	337	5	6	6	10	8.61	31.89	0.52	0.54	0.6	1.12	0.000833033	-3.23835	down	[C]	Energy production and conversion	--	--	--	--	FAD binding domain	Berberine bridge enzyme-like 11 OS=Arabidopsis thaliana OX=3702 GN=At1g30730 PE=2 SV=1	C	Energy production and conversion	PREDICTED: tetrahydrocannabinolic acid synthase-like [Daucus carota subsp. sativus]
c24420.graph_c0	541	501	865	2582	3323	2424	20.43	16.25	32.05	83.15	117.53	95.7	6.1622e-06	2.21867	up	[ER]	Amino acid transport and metabolism ;; General function prediction only	Biological Process: single-organism metabolic process (GO:0044710);; Molecular Function: metal ion binding (GO:0046872);;	K19635|0|vvi:100232980|K19635 L-idonate 5-dehydrogenase [EC:1.1.1.366] | (RefSeq) L-idonate dehydrogenase	[Q]	Secondary metabolites biosynthesis, transport and catabolism	Zinc-binding dehydrogenase;; Glucose dehydrogenase C-terminus;; Zinc-binding dehydrogenase;; Alcohol dehydrogenase GroES-like domain	L-idonate 5-dehydrogenase OS=Vitis vinifera OX=29760 GN=VIT_16s0100g00290 PE=1 SV=2	E	Amino acid transport and metabolism	PREDICTED: L-idonate 5-dehydrogenase [Daucus carota subsp. sativus]
c45088.graph_c0	154	163	149	529	734	1154	7.15	7.1	6.51	20.7	32.01	56.65	2.43446e-06	2.50294	up	--	--	--	K14484|1.17181e-39|mdm:103443742|K14484 auxin-responsive protein IAA | (RefSeq) IAA11; auxin-responsive protein IAA26-like	--	--	AUX/IAA family	Auxin-responsive protein IAA26 OS=Arabidopsis thaliana OX=3702 GN=IAA26 PE=1 SV=2	K	Transcription	PREDICTED: auxin-responsive protein IAA26-like [Daucus carota subsp. sativus]
c35498.graph_c0	58	49	34	144	182	91	16.59	13.98	8.73	31.57	52.68	30.79	0.00741726	1.66134	up	--	--	Biological Process: protein phosphorylation (GO:0006468);; Biological Process: signal transduction (GO:0007165);; Molecular Function: transmembrane receptor protein kinase activity (GO:0019199);;	--	[R]	General function prediction only	--	Leucine-rich repeat protein 1 OS=Arabidopsis thaliana OX=3702 GN=LRR1 PE=1 SV=1	S	Function unknown	PREDICTED: BRASSINOSTEROID INSENSITIVE 1-associated receptor kinase 1-like [Ipomoea nil]
c46771.graph_c0	139	74	108	576	419	242	4.89	2.12	3.47	15.91	12.39	8.04	0.000199903	1.96407	up	--	;;	Molecular Function: protein serine/threonine kinase activity (GO:0004674);; Molecular Function: ATP binding (GO:0005524);; Biological Process: protein phosphorylation (GO:0006468);;	--	[T]	Signal transduction mechanisms	Protein kinase domain;; Protein tyrosine kinase;; Protein kinase domain;; Protein tyrosine kinase	Probable serine/threonine-protein kinase PBL19 OS=Arabidopsis thaliana OX=3702 GN=PBL19 PE=1 SV=1	T	Signal transduction mechanisms	PREDICTED: probable receptor-like protein kinase At5g47070 [Daucus carota subsp. sativus]
c53624.graph_c0	88	130	155	32	26	35	21.49	29.72	38.07	6.49	5.96	9.33	0.00643012	-1.70753	down	--	--	Molecular Function: protein domain specific binding (GO:0019904);;	K06630|2.56324e-65|jcu:105630684|K06630 14-3-3 protein epsilon | (RefSeq) 14-3-3-like protein GF14 kappa	[O]	Posttranslational modification, protein turnover, chaperones	14-3-3 protein	14-3-3-like protein D OS=Nicotiana tabacum OX=4097 PE=2 SV=1	T	Signal transduction mechanisms	PREDICTED: 14-3-3-like protein GF14 kappa [Daucus carota subsp. sativus]
c32280.graph_c0	1075	989	1321	203	223	246	60.13	48.35	71.74	9.62	11.71	14.28	1.5085e-05	-2.039	down	--	--	Cellular Component: integral component of membrane (GO:0016021);;	--	--	--	Protein of unknown function (DUF2854)	--	S	Function unknown	PREDICTED: thylakoid membrane protein slr0575 [Daucus carota subsp. sativus]
c49501.graph_c0	2336	4276	2236	18047	14957	8799	51.12	81.06	47.21	334.48	306.25	197.64	2.54228e-07	2.31968	up	[O]	Posttranslational modification, protein turnover, chaperones	Molecular Function: serine-type endopeptidase activity (GO:0004252);; Cellular Component: Golgi apparatus (GO:0005794);; Biological Process: proteolysis (GO:0006508);; Cellular Component: plant-type cell wall (GO:0009505);; Cellular Component: plasmodesma (GO:0009506);;	--	--	--	Subtilase family;; Peptidase inhibitor I9;; PA domain	Subtilisin-like protease SBT1.8 OS=Arabidopsis thaliana OX=3702 GN=SBT1.8 PE=1 SV=1	O	Posttranslational modification, protein turnover, chaperones	PREDICTED: subtilisin-like protease SBT1.8 [Daucus carota subsp. sativus]
c34453.graph_c0	433	171	825	38	26	45	29.79	10.32	55.21	2.21	1.68	3.22	2.52877e-07	-3.27174	down	--	--	--	--	--	--	--	Non-specific lipid-transfer protein 2 OS=Oryza sativa subsp. indica OX=39946 GN=LTP-2 PE=3 SV=2	U	Intracellular trafficking, secretion, and vesicular transport	hypothetical protein DCAR_010703 [Daucus carota subsp. sativus]
c40752.graph_c1	6	5	21	60	42	59	0.26	0.19	0.88	2.2	1.7	2.63	0.00774426	2.21649	up	[DPM]	Cell cycle control, cell division, chromosome partitioning ;; Inorganic ion transport and metabolism ;; Cell wall/membrane/envelope biogenesis	Molecular Function: copper ion binding (GO:0005507);; Biological Process: lignin biosynthetic process (GO:0009809);; Molecular Function: oxidoreductase activity, oxidizing metal ions (GO:0016722);; Biological Process: lignin catabolic process (GO:0046274);; Cellular Component: apoplast (GO:0048046);; Molecular Function: hydroquinone:oxygen oxidoreductase activity (GO:0052716);; Biological Process…	K05909|0|rcu:8284140|K05909 laccase [EC:1.10.3.2] | (RefSeq) laccase-4	[Q]	Secondary metabolites biosynthesis, transport and catabolism	Multicopper oxidase;; Multicopper oxidase;; Multicopper oxidase	Laccase-4 OS=Arabidopsis thaliana OX=3702 GN=IRX12 PE=2 SV=2	Q	Secondary metabolites biosynthesis, transport and catabolism	PREDICTED: laccase-4-like [Daucus carota subsp. sativus]
c32954.graph_c0	63	13	46	2	2	1	2.8	0.23	1.52	0.07	0.94	0.02	0.000118437	-3.61639	down	--	--	Molecular Function: Rho guanyl-nucleotide exchange factor activity (GO:0005089);; Biological Process: positive regulation of GTPase activity (GO:0043547);;	--	--	--	PRONE (Plant-specific Rop nucleotide exchanger)	Rop guanine nucleotide exchange factor 12 OS=Arabidopsis thaliana OX=3702 GN=ROPGEF12 PE=1 SV=1	S	Function unknown	PREDICTED: rop guanine nucleotide exchange factor 12 [Daucus carota subsp. sativus]
c30474.graph_c0	262	109	227	7	0	11	47.8	18.31	41.01	1.07	0	2.13	8.41778e-10	-4.34683	down	--	--	--	--	--	--	VQ motif	VQ motif-containing protein 1 OS=Arabidopsis thaliana OX=3702 GN=VQ1 PE=1 SV=1	S	Function unknown	PREDICTED: VQ motif-containing protein 10 [Daucus carota subsp. sativus]
c49050.graph_c0	216	187	162	929	734	1731	6.61	4.95	4.78	25.15	21.1	55.59	3.66954e-07	2.67958	up	--	--	Cellular Component: membrane (GO:0016020);;	K00902|5.61806e-173|vvi:100261999|K00902 dolichol kinase [EC:2.7.1.108] | (RefSeq) dolichol kinase EVAN	[I]	Lipid transport and metabolism	--	Dolichol kinase EVAN OS=Arabidopsis thaliana OX=3702 GN=EVN PE=2 SV=1	I	Lipid transport and metabolism	PREDICTED: dolichol kinase EVAN [Daucus carota subsp. sativus]
c40346.graph_c1	85	61	82	12	6	13	12.07	7.37	9.77	1.51	0.82	1.81	0.00021136	-2.49561	down	--	--	Molecular Function: DNA binding (GO:0003677);; Cellular Component: integral component of membrane (GO:0016021);;	K09422|1.17023e-53|eus:EUTSA_v10028861mg|K09422 myb proto-oncogene protein, plant | (RefSeq) hypothetical protein	[K]	Transcription	Myb-like DNA-binding domain;; Myb-like DNA-binding domain	Transcription repressor MYB6 OS=Arabidopsis thaliana OX=3702 GN=MYB6 PE=1 SV=1	K	Transcription	hypothetical protein EUTSA_v10028861mg [Eutrema salsugineum]
c51666.graph_c0	486	361	330	42	37	20	10.23	6.48	6.71	0.93	0.83	0.45	5.28559e-12	-3.26131	down	[K]	Transcription	Molecular Function: plastid sigma factor activity (GO:0001053);; Molecular Function: DNA binding (GO:0003677);; Molecular Function: transcription factor activity, sequence-specific DNA binding (GO:0003700);; Cellular Component: mitochondrion (GO:0005739);; Biological Process: DNA-templated transcription, initiation (GO:0006352);; Cellular Component: chloroplast (GO:0009507);; Biological Process: …	K03093|0|sot:102586954|K03093 RNA polymerase sigma factor | (RefSeq) RNA polymerase sigma factor sigE, chloroplastic/mitochondrial	--	--	Sigma-70 region 3;; Sigma-70, region 4;; Sigma-70 region 2;; Myb-like DNA-binding domain;; Myb-like DNA-binding domain	RNA polymerase sigma factor sigE, chloroplastic/mitochondrial OS=Arabidopsis thaliana OX=3702 GN=SIGE PE=1 SV=1	K	Transcription	hypothetical protein DCAR_014530 [Daucus carota subsp. sativus]
c48971.graph_c0	79	183	49	28	14	3	1.61	2.95	1.03	0.44	0.28	0.07	0.00268993	-2.40256	down	--	--	Molecular Function: nucleic acid binding (GO:0003676);; Cellular Component: cytoplasm (GO:0005737);; Biological Process: vegetative phase change (GO:0010050);; Biological Process: production of ta-siRNAs involved in RNA interference (GO:0010267);; Biological Process: production of lsiRNA involved in RNA interference (GO:0010599);; Biological Process: regulation of development, heterochronic (GO:0…	K11593|0|vvi:100264433|K11593 eukaryotic translation initiation factor 2C | (RefSeq) protein argonaute 7	[J]	Translation, ribosomal structure and biogenesis	Piwi domain;; N-terminal domain of argonaute;; PAZ domain;; Argonaute linker 1 domain;; Argonaute linker 2 domain	Protein argonaute 7 OS=Arabidopsis thaliana OX=3702 GN=AGO7 PE=2 SV=1	J	Translation, ribosomal structure and biogenesis	PREDICTED: protein argonaute 7 [Daucus carota subsp. sativus]
c41978.graph_c0	10229	13115	18079	2856	3743	4640	1473.19	1583.29	2421.24	362.09	517.62	725.86	0.00644273	-1.56584	down	--	--	Cellular Component: integral component of membrane (GO:0016021);;	K14332|5.54246e-67|rcu:8263317|K14332 photosystem I subunit PsaO | (RefSeq) photosystem I subunit O	--	--	--	Photosystem I subunit O OS=Arabidopsis thaliana OX=3702 GN=PSAO PE=1 SV=1	S	Function unknown	PREDICTED: photosystem I subunit O [Daucus carota subsp. sativus]
c50019.graph_c0	83	55	24	15	6	2	4.09	2.55	1.15	0.43	0.22	0.06	0.00602929	-2.40672	down	--	--	--	--	[K]	Transcription	Associated with HOX;; Homeobox KN domain;; Homeobox domain	Homeobox protein ATH1 OS=Arabidopsis thaliana OX=3702 GN=ATH1 PE=1 SV=1	K	Transcription	PREDICTED: homeobox protein BEL1 homolog [Daucus carota subsp. sativus]
c42670.graph_c0	101	61	308	4	0	1	6.85	3.2	19.94	0.22	0	0.06	2.81389e-11	-5.39783	down	[I]	Lipid transport and metabolism	Cellular Component: chloroplast envelope (GO:0009941);; Molecular Function: kinase activity (GO:0016301);; Biological Process: phosphorylation (GO:0016310);; Molecular Function: hydrolase activity, acting on ester bonds (GO:0016788);;	--	--	--	PGAP1-like protein	--	S	Function unknown	PREDICTED: uncharacterized protein LOC108205460 [Daucus carota subsp. sativus]
c45161.graph_c0	762	626	860	1	5	21	24.23	17.51	26.76	0.03	0.15	0.69	5.60906e-16	-5.42112	down	[I]	Lipid transport and metabolism	Cellular Component: cytoplasm (GO:0005737);; Molecular Function: ubiquitin protein ligase binding (GO:0031625);; Molecular Function: ubiquitin protein ligase activity (GO:0061630);;	K20417|1.0738e-127|pop:POPTR_0001s44870g|K20417 palmitoyl-[glycerolipid] 3-(E)-desaturase [EC:1.14.19.43] | (RefSeq) hypothetical protein	[O]	Posttranslational modification, protein turnover, chaperones	B domain of TMEM189, localisation domain	Fatty acid desaturase 4, chloroplastic OS=Arabidopsis thaliana OX=3702 GN=FAD4 PE=1 SV=1	S	Function unknown	PREDICTED: fatty acid desaturase 4, chloroplastic [Daucus carota subsp. sativus]
c47820.graph_c0	1312	592	389	71	72	59	33.64	13.12	9.63	1.55	1.74	1.56	1.38357e-08	-3.1147	down	--	--	Cellular Component: integral component of membrane (GO:0016021);; Biological Process: transmembrane transport (GO:0055085);;	--	[T]	Signal transduction mechanisms	OPT oligopeptide transporter protein	Oligopeptide transporter 7 OS=Arabidopsis thaliana OX=3702 GN=OPT7 PE=2 SV=1	S	Function unknown	PREDICTED: oligopeptide transporter 7-like [Daucus carota subsp. sativus]
c30350.graph_c1	36	71	41	178	73	387	0.68	1.16	0.74	2.89	1.3	7.72	0.00347358	2.1689	up	--	--	--	--	--	--	--	--	S	Function unknown	PREDICTED: myosin-2 heavy chain-like [Daucus carota subsp. sativus]
c42542.graph_c0	898	1190	821	229	157	111	53.76	60.68	47.24	11.38	8.56	6.76	2.4972e-08	-2.32042	down	[I]	Lipid transport and metabolism	--	--	[V]	Defense mechanisms	alpha/beta hydrolase fold;; Carboxylesterase family;; Steryl acetyl hydrolase	Probable carboxylesterase 8 OS=Arabidopsis thaliana OX=3702 GN=CXE8 PE=2 SV=1	I	Lipid transport and metabolism	PREDICTED: probable carboxylesterase 8 [Daucus carota subsp. sativus]
c36186.graph_c0	24841	24930	55965	3438	6312	5744	3515.73	3184.65	7811.49	408.65	839.15	864.31	5.00488e-05	-2.3819	down	--	--	Biological Process: response to light stimulus (GO:0009416);; Cellular Component: photosystem I (GO:0009522);; Cellular Component: photosystem II (GO:0009523);; Cellular Component: chloroplast thylakoid membrane (GO:0009535);; Biological Process: photosynthesis, light harvesting in photosystem I (GO:0009768);; Cellular Component: chloroplast envelope (GO:0009941);; Cellular Component: plastoglobu…	K08913|3.52347e-120|sot:102606321|K08913 light-harvesting complex II chlorophyll a/b binding protein 2 | (RefSeq) chlorophyll a-b binding protein 5, chloroplastic	--	--	Chlorophyll A-B binding protein	Chlorophyll a-b binding protein 37, chloroplastic OS=Petunia sp. OX=4104 GN=CAB37 PE=3 SV=1	J	Translation, ribosomal structure and biogenesis	PREDICTED: chlorophyll a-b binding protein 37, chloroplastic [Daucus carota subsp. sativus]
c49053.graph_c0	402	401	544	1400	1277	823	20.09	15.74	26.3	70.03	75.85	57.09	0.00258233	1.47689	up	[T]	Signal transduction mechanisms	Molecular Function: protein serine/threonine kinase activity (GO:0004674);; Molecular Function: ATP binding (GO:0005524);; Biological Process: protein phosphorylation (GO:0006468);;	--	[T]	Signal transduction mechanisms	--	Probable serine/threonine-protein kinase PBL19 OS=Arabidopsis thaliana OX=3702 GN=PBL19 PE=1 SV=1	T	Signal transduction mechanisms	hypothetical protein DCAR_004516 [Daucus carota subsp. sativus]
c52343.graph_c0	3187	2139	5891	14617	14819	15469	55.54	32.83	97.39	213.87	238.9	273.32	0.000228946	2.0615	up	--	--	Cellular Component: nucleus (GO:0005634);; Cellular Component: cytoplasm (GO:0005737);; Biological Process: carbohydrate metabolic process (GO:0005975);; Cellular Component: integral component of membrane (GO:0016021);; Molecular Function: glucan endo-1,3-beta-D-glucosidase activity (GO:0042973);; Cellular Component: anchored component of plasma membrane (GO:0046658);;	--	--	--	Glycosyl hydrolases family 17	Glucan endo-1,3-beta-glucosidase 14 OS=Arabidopsis thaliana OX=3702 GN=At2g27500 PE=1 SV=2	G	Carbohydrate transport and metabolism	PREDICTED: glucan endo-1,3-beta-glucosidase 14-like isoform X1 [Daucus carota subsp. sativus]
c38042.graph_c0	3229	2593	5753	11076	16929	18588	207.54	146.12	360.97	604.58	1028.4	1259.3	0.000253983	2.10977	up	--	--	Biological Process: transcription, DNA-templated (GO:0006351);;	--	--	--	AP2 domain	Dehydration-responsive element-binding protein 1A OS=Arabidopsis thaliana OX=3702 GN=DREB1A PE=1 SV=2	K	Transcription	PREDICTED: dehydration-responsive element-binding protein 1A-like [Daucus carota subsp. sativus]
c50480.graph_c0	566	460	574	207	181	72	15.04	10.72	13.9	4.41	4.26	1.86	0.00474134	-1.59252	down	--	--	Biological Process: cellular process (GO:0009987);; Biological Process: system development (GO:0048731);;	--	--	--	--	Senescence-associated protein SPA15, chloroplastic OS=Ipomoea batatas OX=4120 GN=SPA15 PE=2 SV=1	S	Function unknown	PREDICTED: uncharacterized protein LOC108215681 isoform X1 [Daucus carota subsp. sativus]
c45501.graph_c0	273	461	151	124	58	55	9.8	14.36	5.26	3.8	1.95	2.04	0.00695201	-1.66207	down	--	--	Biological Process: single-organism process (GO:0044699);;	--	--	--	TCP family transcription factor	Transcription factor TCP14 OS=Arabidopsis thaliana OX=3702 GN=TCP14 PE=1 SV=1	K	Transcription	PREDICTED: transcription factor TCP15-like [Daucus carota subsp. sativus]
c42970.graph_c0	15	11	24	32	50	166	0.46	0.29	0.71	0.83	1.44	5.26	0.00876881	2.2943	up	--	--	Molecular Function: 1-phosphatidylinositol binding (GO:0005545);; Cellular Component: clathrin-coated vesicle (GO:0030136);; Molecular Function: clathrin binding (GO:0030276);; Biological Process: clathrin coat assembly (GO:0048268);;	--	[TU]	--	ANTH domain	Probable clathrin assembly protein At4g32285 OS=Arabidopsis thaliana OX=3702 GN=At4g32285 PE=1 SV=2	U	Intracellular trafficking, secretion, and vesicular transport	PREDICTED: probable clathrin assembly protein At4g32285 [Daucus carota subsp. sativus]
c45769.graph_c0	46	43	21	2	0	0	5.65	4.74	2.54	0.21	0	0	1.19911e-05	-4.26126	down	[G]	Carbohydrate transport and metabolism	Biological Process: carbohydrate metabolic process (GO:0005975);; Molecular Function: beta-glucosidase activity (GO:0008422);; Molecular Function: scopolin beta-glucosidase activity (GO:0102483);;	K05349|4.939e-82|egr:104443077|K05349 beta-glucosidase [EC:3.2.1.21] | (RefSeq) beta-glucosidase BoGH3B	--	--	Glycosyl hydrolase family 3 N terminal domain	--	G	Carbohydrate transport and metabolism	PREDICTED: beta-glucosidase BoGH3B-like [Daucus carota subsp. sativus]
c41317.graph_c0	514	434	950	104	33	157	20.04	14.78	36.16	3.34	1.21	6.33	0.000635333	-2.31579	down	[E]	Amino acid transport and metabolism	Molecular Function: glutamate-ammonia ligase activity (GO:0004356);; Molecular Function: ATP binding (GO:0005524);; Biological Process: glutamine biosynthetic process (GO:0006542);; Cellular Component: chloroplast (GO:0009507);;	K01915|4.40945e-162|sind:105171412|K01915 glutamine synthetase [EC:6.3.1.2] | (RefSeq) glutamine synthetase leaf isozyme, chloroplastic	[E]	Amino acid transport and metabolism	Glutamine synthetase, beta-Grasp domain	Glutamine synthetase, chloroplastic OS=Daucus carota OX=4039 GN=GLN2 PE=2 SV=1	E	Amino acid transport and metabolism	PREDICTED: glutamine synthetase, chloroplastic [Daucus carota subsp. sativus]
c46248.graph_c0	1466	1356	2746	5884	8387	4969	51.46	38.83	95.66	174.29	294.43	194.34	0.000814479	1.87735	up	[T]	Signal transduction mechanisms	--	--	[MOT]	--	Sel1 repeat;; F-box domain	F-box protein At1g70590 OS=Arabidopsis thaliana OX=3702 GN=At1g70590 PE=2 SV=1	S	Function unknown	PREDICTED: F-box protein At1g70590 [Daucus carota subsp. sativus]
c43135.graph_c0	156	589	290	6	7	39	6.94	22.8	12.49	0.23	0.29	1.79	3.26031e-06	-3.50896	down	[O]	Posttranslational modification, protein turnover, chaperones	Biological Process: protein peptidyl-prolyl isomerization (GO:0000413);; Molecular Function: peptidyl-prolyl cis-trans isomerase activity (GO:0003755);; Biological Process: protein folding (GO:0006457);;	K03768|1.2207e-119|gmx:100800469|K03768 peptidyl-prolyl cis-trans isomerase B (cyclophilin B) [EC:5.2.1.8] | (RefSeq) peptidyl-prolyl cis-trans isomerase CYP26-2, chloroplastic-like	[O]	Posttranslational modification, protein turnover, chaperones	Cyclophilin type peptidyl-prolyl cis-trans isomerase/CLD	Peptidyl-prolyl cis-trans isomerase CYP26-2, chloroplastic OS=Arabidopsis thaliana OX=3702 GN=CYP26-2 PE=2 SV=1	O	Posttranslational modification, protein turnover, chaperones	PREDICTED: peptidyl-prolyl cis-trans isomerase CYP26-2, chloroplastic [Daucus carota subsp. sativus]
c49476.graph_c0	79	231	30	22	15	13	2.95	7.79	1.42	0.66	0.49	0.51	0.00438145	-2.29174	down	--	--	Molecular Function: zinc ion binding (GO:0008270);; Cellular Component: integral component of membrane (GO:0016021);; Molecular Function: protein-cysteine S-palmitoyltransferase activity (GO:0019706);;	K20027|1.59424e-131|vvi:100258831|K20027 palmitoyltransferase ZDHHC1/11 [EC:2.3.1.225] | (RefSeq) protein S-acyltransferase 18	[R]	General function prediction only	DHHC palmitoyltransferase	Protein S-acyltransferase 18 OS=Arabidopsis thaliana OX=3702 GN=PAT18 PE=2 SV=2	S	Function unknown	PREDICTED: protein S-acyltransferase 18 [Daucus carota subsp. sativus]
c42826.graph_c0	202	286	283	561	955	568	7.51	9.25	10.79	17.39	38.05	23.56	0.00468563	1.58877	up	--	--	Molecular Function: metal ion binding (GO:0046872);;	--	[A]	RNA processing and modification	RING-variant domain	--	O	Posttranslational modification, protein turnover, chaperones	PREDICTED: uncharacterized protein LOC108210845 [Daucus carota subsp. sativus]
c48144.graph_c0	619	526	477	2280	1055	1161	26.91	18.86	20.61	79.23	41.72	48.47	0.000853231	1.53096	up	[T]	Signal transduction mechanisms	Molecular Function: protein serine/threonine kinase activity (GO:0004674);; Molecular Function: ATP binding (GO:0005524);; Cellular Component: intracellular (GO:0005622);; Biological Process: peptidyl-serine phosphorylation (GO:0018105);; Biological Process: intracellular signal transduction (GO:0035556);;	K08790|0|vvi:100244001|K08790 serine/threonine kinase 38 [EC:2.7.11.1] | (RefSeq) serine/threonine-protein kinase 38-like	[R]	General function prediction only	Protein kinase domain;; Protein tyrosine kinase	Probable serine/threonine protein kinase IRE OS=Arabidopsis thaliana OX=3702 GN=IRE PE=2 SV=1	T	Signal transduction mechanisms	PREDICTED: serine/threonine-protein kinase tricorner-like [Daucus carota subsp. sativus]
c51523.graph_c0	271	314	432	1842	1609	2843	5.9	6.09	9.06	33.85	32.57	63.05	3.67222e-08	2.71425	up	[M]	Cell wall/membrane/envelope biogenesis	Cellular Component: Golgi membrane (GO:0000139);; Biological Process: pectin biosynthetic process (GO:0045489);; Molecular Function: polygalacturonate 4-alpha-galacturonosyltransferase activity (GO:0047262);; Biological Process: cell wall organization (GO:0071555);;	K13648|4.6951e-128|cit:102629185|K13648 alpha-1,4-galacturonosyltransferase [EC:2.4.1.43] | (RefSeq) probable galacturonosyltransferase 6	--	--	Glycosyl transferase family 8	Probable galacturonosyltransferase 6 OS=Arabidopsis thaliana OX=3702 GN=GAUT6 PE=2 SV=1	M	Cell wall/membrane/envelope biogenesis	PREDICTED: probable galacturonosyltransferase 6 isoform X3 [Daucus carota subsp. sativus]
c53422.graph_c0	10	13	18	1	0	0	0.8	0.92	1.41	0.07	0	0	0.00906937	-3.2721	down	--	--	--	--	[R]	General function prediction only	--	Retrovirus-related Pol polyprotein from transposon RE1 OS=Arabidopsis thaliana OX=3702 GN=RE1 PE=2 SV=1	S	Function unknown	uncharacterized protein LOC110923824 [Helianthus annuus]
c35331.graph_c0	215	129	350	50	31	22	27.89	15.07	44.6	5.54	3.76	3.01	3.04564e-05	-2.48604	down	--	--	Cellular Component: membrane (GO:0016020);;	--	--	--	Epidermal patterning factor proteins	EPIDERMAL PATTERNING FACTOR-like protein 4 OS=Arabidopsis thaliana OX=3702 GN=EPFL4 PE=1 SV=1	S	Function unknown	PREDICTED: EPIDERMAL PATTERNING FACTOR-like protein 4 [Daucus carota subsp. sativus]
c37638.graph_c0	222	113	289	5	7	7	23.55	11.26	28.44	0.41	0.64	0.72	9.40602e-13	-4.43373	down	[C]	Energy production and conversion	Molecular Function: electron carrier activity (GO:0009055);; Molecular Function: metal ion binding (GO:0046872);; Molecular Function: iron-sulfur cluster binding (GO:0051536);;	--	--	--	2Fe-2S iron-sulfur cluster binding domain	Photosynthetic NDH subunit of subcomplex B 3, chloroplastic OS=Arabidopsis thaliana OX=3702 GN=PNSB3 PE=2 SV=1	C	Energy production and conversion	PREDICTED: photosynthetic NDH subunit of subcomplex B 3, chloroplastic [Daucus carota subsp. sativus]
c43054.graph_c1	336	291	4	10	6	13	15.31	11.58	0.18	0.39	0.26	0.61	0.000204408	-3.46977	down	--	--	Molecular Function: glycerol-3-phosphate O-acyltransferase activity (GO:0004366);; Biological Process: flower development (GO:0009908);; Biological Process: cutin biosynthetic process (GO:0010143);; Cellular Component: integral component of membrane (GO:0016021);; Biological Process: dephosphorylation (GO:0016311);; Molecular Function: phosphatase activity (GO:0016791);; Molecular Function: glyce…	K13508|3.90714e-178|pper:PRUPE_ppa004498mg|K13508 glycerol-3-phosphate acyltransferase [EC:2.3.1.15] | (RefSeq) hypothetical protein	--	--	Acyltransferase	Glycerol-3-phosphate 2-O-acyltransferase 6 OS=Arabidopsis thaliana OX=3702 GN=GPAT6 PE=1 SV=1	I	Lipid transport and metabolism	PREDICTED: glycerol-3-phosphate 2-O-acyltransferase 6 [Daucus carota subsp. sativus]
c51802.graph_c0	1334	387	291	135	28	172	42.18	10.58	8.85	3.63	0.84	5.53	0.00827081	-2.16725	down	[E]	Amino acid transport and metabolism	Biological Process: amino acid transmembrane transport (GO:0003333);; Molecular Function: amino acid transmembrane transporter activity (GO:0015171);; Cellular Component: integral component of membrane (GO:0016021);;	K03294|0|spen:107011849|K03294 basic amino acid/polyamine antiporter, APA family | (RefSeq) cationic amino acid transporter 1-like	[E]	Amino acid transport and metabolism	Amino acid permease;; Amino acid permease;; C-terminus of AA_permease	Cationic amino acid transporter 1 OS=Arabidopsis thaliana OX=3702 GN=CAT1 PE=1 SV=1	E	Amino acid transport and metabolism	PREDICTED: cationic amino acid transporter 1-like [Daucus carota subsp. sativus]
c41293.graph_c0	714	370	598	216	88	144	32.07	14.93	26.59	8.79	3.61	6.92	0.00223718	-1.70894	down	[CO]	Energy production and conversion ;; Posttranslational modification, protein turnover, chaperones	Cellular Component: integral component of membrane (GO:0016021);; Biological Process: cytochrome complex assembly (GO:0017004);; Biological Process: oxidation-reduction process (GO:0055114);;	--	--	--	Cytochrome C biogenesis protein transmembrane region	Cytochrome c-type biogenesis ccda-like chloroplastic protein 2 OS=Oryza sativa subsp. japonica OX=39947 GN=CCDA2 PE=3 SV=1	O	Posttranslational modification, protein turnover, chaperones	PREDICTED: cytochrome c-type biogenesis ccda-like chloroplastic protein isoform X1 [Daucus carota subsp. sativus]
c37172.graph_c0	15720	26004	26402	1747	2619	2853	1231.7	1795.73	2017.01	115.78	192.68	233.49	5.67987e-09	-2.84293	down	--	--	Molecular Function: structural molecule activity (GO:0005198);; Biological Process: response to light stimulus (GO:0009416);; Cellular Component: photosystem I (GO:0009522);; Cellular Component: chloroplast thylakoid membrane (GO:0009535);; Biological Process: photosynthesis, light harvesting in photosystem I (GO:0009768);; Cellular Component: chloroplast envelope (GO:0009941);; Cellular Componen…	K08914|0|pvu:PHAVU_011G155700g|K08914 light-harvesting complex II chlorophyll a/b binding protein 3 | (RefSeq) hypothetical protein	--	--	Chlorophyll A-B binding protein	Chlorophyll a-b binding protein 13, chloroplastic OS=Solanum lycopersicum OX=4081 GN=CAB13 PE=1 SV=1	S	Function unknown	PREDICTED: chlorophyll a-b binding protein 13, chloroplastic [Daucus carota subsp. sativus]
c40097.graph_c0	1802	988	67	236	46	77	89.51	43.58	3.23	10.04	2.16	4.03	0.00408447	-2.55655	down	[G]	Carbohydrate transport and metabolism	Cellular Component: integral component of plasma membrane (GO:0005887);; Biological Process: water transport (GO:0006833);; Cellular Component: plant-type vacuole membrane (GO:0009705);; Biological Process: cellular water homeostasis (GO:0009992);; Molecular Function: water channel activity (GO:0015250);; Molecular Function: glycerol channel activity (GO:0015254);; Biological Process: glycerol tr…	--	[G]	Carbohydrate transport and metabolism	Major intrinsic protein	Aquaporin TIP3-2 OS=Zea mays OX=4577 GN=TIP3-2 PE=2 SV=1	G	Carbohydrate transport and metabolism	hypothetical protein DCAR_003692 [Daucus carota subsp. sativus]
c46247.graph_c0	452	549	508	2134	3085	5214	17.73	12.82	22.69	85.8	175.16	245.49	3.37717e-08	2.89949	up	[HT]	Coenzyme transport and metabolism ;; Signal transduction mechanisms	--	K08869|2.91814e-86|tcc:TCM_004968|K08869 aarF domain-containing kinase | (RefSeq) Ubiquinone biosynthesis protein coq-8	[R]	General function prediction only	--	Protein ABC transporter 1, mitochondrial OS=Arabidopsis thaliana OX=3702 GN=ABC1 PE=2 SV=1	S	Function unknown	PREDICTED: protein ABC transporter 1, mitochondrial-like [Daucus carota subsp. sativus]
c42882.graph_c0	50	123	5	0	0	0	3.42	7.46	0.32	0	0	0	6.98542e-07	-5.20948	down	--	--	--	--	--	--	--	--	S	Function unknown	PREDICTED: uncharacterized protein LOC108196435 [Daucus carota subsp. sativus]
c30382.graph_c0	129	129	162	4	12	2	7.41	6.21	8.67	0.19	0.8	0.16	2.51642e-09	-3.92838	down	[IQR]	Lipid transport and metabolism ;; Secondary metabolites biosynthesis, transport and catabolism ;; General function prediction only	--	K19329|5.07869e-170|vvi:100264493|K19329 WW domain-containing oxidoreductase | (RefSeq) short-chain dehydrogenase TIC 32, chloroplastic	[Q]	Secondary metabolites biosynthesis, transport and catabolism	short chain dehydrogenase;; Enoyl-(Acyl carrier protein) reductase;; KR domain	Short-chain dehydrogenase TIC 32, chloroplastic OS=Pisum sativum OX=3888 GN=TIC32 PE=1 SV=1	S	Function unknown	PREDICTED: short-chain dehydrogenase TIC 32, chloroplastic-like [Daucus carota subsp. sativus]
c25010.graph_c0	90	121	149	51	10	22	2.97	3.45	4.75	1.43	0.31	0.75	0.00647206	-1.90071	down	[IQ]	Lipid transport and metabolism ;; Secondary metabolites biosynthesis, transport and catabolism	--	--	[I]	Lipid transport and metabolism	AMP-binding enzyme;; AMP-binding enzyme C-terminal domain	4-coumarate--CoA ligase-like 9 OS=Arabidopsis thaliana OX=3702 GN=4CLL9 PE=1 SV=2	IQ	--	PREDICTED: 4-coumarate--CoA ligase-like 9 [Vitis vinifera]
c48641.graph_c0	1720	3726	754	567	273	554	66.12	125.06	27.45	18.8	9.57	21.58	0.00750875	-1.80162	down	--	--	Molecular Function: hydrolase activity, hydrolyzing O-glycosyl compounds (GO:0004553);; Biological Process: carbohydrate metabolic process (GO:0005975);;	--	--	--	Glycosyl hydrolases family 17;; X8 domain	Glucan endo-1,3-beta-glucosidase 3 OS=Arabidopsis thaliana OX=3702 GN=At2g01630 PE=1 SV=2	G	Carbohydrate transport and metabolism	PREDICTED: glucan endo-1,3-beta-glucosidase 14-like isoform X1 [Daucus carota subsp. sativus]
c40155.graph_c1	132	3	32	2	4	1	10.66	0.21	2.53	0.14	0.3	0.08	0.00146018	-3.38433	down	--	--	--	--	[K]	Transcription	Homeobox KN domain;; Homeobox domain	Homeobox protein BEL1 homolog OS=Arabidopsis thaliana OX=3702 GN=BEL1 PE=1 SV=2	K	Transcription	PREDICTED: homeobox protein BEL1 homolog [Daucus carota subsp. sativus]
c36638.graph_c0	80	15	16	2	0	2	8.32	1.38	1.57	0.2	0	0.22	0.000499188	-3.57819	down	--	--	--	--	--	--	--	--	--	--	hypothetical protein DCAR_007290 [Daucus carota subsp. sativus]
c37691.graph_c0	282	373	258	90	54	33	17.53	20.32	15.6	4.74	3.15	2.13	1.32435e-05	-2.14329	down	[R]	General function prediction only	Cellular Component: integral component of membrane (GO:0016021);;	--	--	--	Divergent PAP2 family	--	S	Function unknown	PREDICTED: uncharacterized membrane protein YuiD [Daucus carota subsp. sativus]
c31757.graph_c1	67	49	29	203	136	123	5.1	2.9	2.07	12.15	8.92	8.93	0.00282013	1.73262	up	[T]	Signal transduction mechanisms	Molecular Function: protein serine/threonine kinase activity (GO:0004674);; Molecular Function: ATP binding (GO:0005524);; Biological Process: protein phosphorylation (GO:0006468);; Biological Process: signal transduction (GO:0007165);; Cellular Component: integral component of membrane (GO:0016021);;	K07198|2.41856e-101|nnu:104593799|K07198 5'-AMP-activated protein kinase, catalytic alpha subunit [EC:2.7.11.11] | (RefSeq) CBL-interacting protein kinase 18-like	[T]	Signal transduction mechanisms	Protein kinase domain;; Protein tyrosine kinase;; Kinase-like	CBL-interacting protein kinase 5 OS=Oryza sativa subsp. japonica OX=39947 GN=CIPK5 PE=2 SV=1	T	Signal transduction mechanisms	PREDICTED: CBL-interacting protein kinase 18-like [Daucus carota subsp. sativus]
c28863.graph_c0	52	39	43	1	5	6	2.71	1.82	2.18	0.04	0.3	0.27	0.00112809	-2.79242	down	[T]	Signal transduction mechanisms	Cellular Component: integral component of membrane (GO:0016021);; Molecular Function: oxidoreductase activity (GO:0016491);; Biological Process: oxidation-reduction process (GO:0055114);;	--	[PQ]	--	Ferric reductase NAD binding domain;; FAD-binding domain;; Ferric reductase like transmembrane component	Ferric reduction oxidase 2 OS=Arabidopsis thaliana OX=3702 GN=FRO2 PE=1 SV=2	U	Intracellular trafficking, secretion, and vesicular transport	PREDICTED: ferric reduction oxidase 2-like [Daucus carota subsp. sativus]
c53458.graph_c0	6	83	1	0	0	0	0.38	4.63	0.06	0	0	0	0.000987438	-4.03355	down	--	--	Biological Process: phenylpropanoid biosynthetic process (GO:0009699);; Molecular Function: guiding stereospecific synthesis activity (GO:0042349);; Biological Process: regulation of catalytic activity (GO:0050790);;	--	--	--	Dirigent-like protein	Dirigent protein 10 OS=Arabidopsis thaliana OX=3702 GN=DIR10 PE=2 SV=1	S	Function unknown	PREDICTED: dirigent protein 25-like [Daucus carota subsp. sativus]
c35925.graph_c0	313	1388	189	138	71	121	12.63	48.8	7.01	5.92	3.4	5.04	0.00609347	-2.08171	down	[G]	Carbohydrate transport and metabolism	Molecular Function: hydrolase activity, hydrolyzing O-glycosyl compounds (GO:0004553);; Biological Process: carbohydrate metabolic process (GO:0005975);;	K05349|0|tcc:TCM_041670|K05349 beta-glucosidase [EC:3.2.1.21] | (RefSeq) Glycosyl hydrolase family protein isoform 1	--	--	Glycosyl hydrolase family 3 N terminal domain;; Glycosyl hydrolase family 3 C-terminal domain	Beta-D-xylosidase 3 OS=Arabidopsis thaliana OX=3702 GN=BXL3 PE=1 SV=1	G	Carbohydrate transport and metabolism	PREDICTED: beta-glucosidase BoGH3B-like [Daucus carota subsp. sativus]
c45060.graph_c0	442	296	17	33	10	7	24.56	14.23	0.91	1.5	0.5	0.38	0.000115238	-3.3028	down	--	--	--	--	--	--	Transferase family	Protein ECERIFERUM 26-like OS=Arabidopsis thaliana OX=3702 GN=CER26L PE=2 SV=1	S	Function unknown	PREDICTED: salutaridinol 7-O-acetyltransferase-like [Daucus carota subsp. sativus]
c46993.graph_c0	436	86	428	80	44	41	10.52	1.79	9.95	1.64	0.99	1.02	0.00150831	-2.24165	down	[E]	Amino acid transport and metabolism	Cellular Component: integral component of plasma membrane (GO:0005887);; Molecular Function: urea transmembrane transporter activity (GO:0015204);; Molecular Function: symporter activity (GO:0015293);; Biological Process: urea transmembrane transport (GO:0071918);;	K20989|0|vvi:100242634|K20989 urea-proton symporter | (RefSeq) urea-proton symporter DUR3	[E]	Amino acid transport and metabolism	Sodium:solute symporter family	Urea-proton symporter DUR3 OS=Arabidopsis thaliana OX=3702 GN=DUR3 PE=1 SV=1	E	Amino acid transport and metabolism	PREDICTED: urea-proton symporter DUR3 [Daucus carota subsp. sativus]
c44650.graph_c0	89	143	139	27	37	22	7.89	10.99	11.8	2.03	3.01	2.02	0.00437746	-1.79059	down	[S]	Function unknown	--	K02221|2.18209e-52|pop:POPTR_0005s22090g|K02221 YggT family protein | (RefSeq) POPTRDRAFT_1078889; hypothetical protein	--	--	YGGT family	Protein COFACTOR ASSEMBLY OF COMPLEX C SUBUNIT B CCB3, chloroplastic OS=Arabidopsis thaliana OX=3702 GN=CCB3 PE=1 SV=1	S	Function unknown	PREDICTED: protein COFACTOR ASSEMBLY OF COMPLEX C SUBUNIT B CCB3, chloroplastic [Daucus carota subsp. sativus]
c53293.graph_c0	0	0	0	11	12	28	0	0	0	1.05	1.28	3.35	0.000194946	4.29645	up	--	--	--	--	--	--	--	--	--	--	hypothetical protein DCAR_027978 [Daucus carota subsp. sativus]
c44284.graph_c0	130	162	253	6	4	24	6.44	7.01	12.17	0.31	0.19	1.26	2.49039e-06	-3.35865	down	--	--	Cellular Component: chloroplast thylakoid membrane (GO:0009535);; Cellular Component: chloroplast envelope (GO:0009941);;	--	--	--	PAP_fibrillin;; PAP_fibrillin	Probable plastid-lipid-associated protein 12, chloroplastic OS=Arabidopsis thaliana OX=3702 GN=PAP12 PE=1 SV=1	S	Function unknown	PREDICTED: probable plastid-lipid-associated protein 12, chloroplastic isoform X1 [Eucalyptus grandis]
c16660.graph_c0	68	53	72	7	17	0	8.99	6.3	9.37	0.78	2.11	0	0.009766	-2.42825	down	--	--	--	--	--	--	Wound-induced protein	--	S	Function unknown	PREDICTED: uncharacterized protein LOC108213201 [Daucus carota subsp. sativus]
c41014.graph_c0	564	3139	631	13	107	144	67.33	304.17	65.64	1.01	10.3	15.85	0.000140879	-3.15452	down	--	--	Cellular Component: integral component of membrane (GO:0016021);;	--	--	--	Chlorophyll A-B binding protein	Early light-induced protein 1, chloroplastic OS=Arabidopsis thaliana OX=3702 GN=ELIP1 PE=1 SV=1	S	Function unknown	PREDICTED: early light-induced protein 1, chloroplastic-like [Daucus carota subsp. sativus]
c40966.graph_c0	629	460	1068	1733	2156	2185	63.03	41.27	100.86	149.62	191.36	218.81	0.00748823	1.60639	up	[O]	Posttranslational modification, protein turnover, chaperones	--	--	[O]	Posttranslational modification, protein turnover, chaperones	DnaJ domain	Chaperone protein dnaJ 20, chloroplastic OS=Arabidopsis thaliana OX=3702 GN=ATJ20 PE=1 SV=2	O	Posttranslational modification, protein turnover, chaperones	PREDICTED: chaperone protein dnaJ 20, chloroplastic-like [Daucus carota subsp. sativus]
c45266.graph_c0	1175	837	976	4590	1894	2874	49.78	30.61	40.52	169.16	77.42	129.19	0.00036626	1.69773	up	--	--	--	--	[T]	Signal transduction mechanisms	--	--	S	Function unknown	hypothetical protein DCAR_019222 [Daucus carota subsp. sativus]
c16755.graph_c0	769	347	6	1	0	0	119.03	48.7	0.92	0.13	0	0	0.00956601	-3.50922	down	--	--	--	--	--	--	--	--	--	--	hypothetical protein DCAR_021893 [Daucus carota subsp. sativus]
c48296.graph_c1	4325	4742	4599	15597	19151	16931	205.2	195.28	225.07	722.66	982.88	976.81	1.61278e-06	2.06484	up	--	--	Cellular Component: cytoplasm (GO:0005737);; Molecular Function: ubiquitin protein ligase binding (GO:0031625);; Molecular Function: ubiquitin protein ligase activity (GO:0061630);;	K10578|2.39715e-65|pop:POPTR_0010s15390g|K10578 ubiquitin-conjugating enzyme E2 J1 [EC:2.3.2.23] | (RefSeq) POPTRDRAFT_822202; ubiquitin-conjugating enzyme family protein	[O]	Posttranslational modification, protein turnover, chaperones	Ubiquitin-conjugating enzyme	Ubiquitin-conjugating enzyme E2 32 OS=Arabidopsis thaliana OX=3702 GN=UBC32 PE=2 SV=1	O	Posttranslational modification, protein turnover, chaperones	hypothetical protein DCAR_030467 [Daucus carota subsp. sativus]
c47836.graph_c0	552	740	768	243	209	236	17.52	20.34	23.56	6.56	6.23	7.72	0.00743605	-1.33875	down	[O]	Posttranslational modification, protein turnover, chaperones	Molecular Function: metalloendopeptidase activity (GO:0004222);; Biological Process: proteolysis (GO:0006508);; Cellular Component: chloroplast (GO:0009507);; Biological Process: chloroplast organization (GO:0009658);; Biological Process: negative gravitropism (GO:0009959);; Biological Process: thylakoid membrane organization (GO:0010027);; Biological Process: photosystem II assembly (GO:0010207)…	--	--	--	Peptidase family M50	Probable zinc metalloprotease EGY1, chloroplastic OS=Arabidopsis thaliana OX=3702 GN=EGY1 PE=2 SV=1	M	Cell wall/membrane/envelope biogenesis	PREDICTED: probable zinc metalloprotease EGY1, chloroplastic [Daucus carota subsp. sativus]
c51867.graph_c0	319	181	264	125	35	46	7.83	3.8	6.14	2.52	0.79	1.06	0.00573375	-1.73258	down	--	--	--	--	[R]	General function prediction only	PPR repeat family;; PPR repeat;; Pentatricopeptide repeat domain;; PPR repeat;; Pentacotripeptide-repeat region of PRORP	Pentatricopeptide repeat-containing protein At5g50280, chloroplastic OS=Arabidopsis thaliana OX=3702 GN=EMB1006 PE=2 SV=1	S	Function unknown	PREDICTED: pentatricopeptide repeat-containing protein At5g50280, chloroplastic [Daucus carota subsp. sativus]
c37762.graph_c0	743	685	481	181	103	130	57.64	51.61	39.63	13.47	8.47	12.28	9.81515e-06	-1.97216	down	--	--	--	--	[K]	Transcription	Homeobox domain	Homeobox-leucine zipper protein ATHB-52 OS=Arabidopsis thaliana OX=3702 GN=ATHB-52 PE=2 SV=1	K	Transcription	PREDICTED: homeobox-leucine zipper protein ATHB-52 [Daucus carota subsp. sativus]
c38088.graph_c0	212	295	152	49	21	15	15.01	18.43	10.54	2.98	1.39	1.11	7.70009e-07	-2.68535	down	--	--	--	--	--	--	Transcriptional repressor, ovate	Transcription repressor OFP13 OS=Arabidopsis thaliana OX=3702 GN=OFP13 PE=1 SV=1	S	Function unknown	PREDICTED: transcription repressor OFP13 [Daucus carota subsp. sativus]
c43902.graph_c0	2745	10569	1434	675	182	761	117.93	395	59.67	24.65	7.34	33.81	0.000336159	-2.66057	down	--	--	Molecular Function: aspartic-type endopeptidase activity (GO:0004190);; Biological Process: proteolysis (GO:0006508);; Biological Process: protein catabolic process (GO:0030163);;	--	[O]	Posttranslational modification, protein turnover, chaperones	Xylanase inhibitor N-terminal;; Xylanase inhibitor C-terminal;; Eukaryotic aspartyl protease	Aspartyl protease AED3 OS=Arabidopsis thaliana OX=3702 GN=AED3 PE=1 SV=1	O	Posttranslational modification, protein turnover, chaperones	PREDICTED: aspartyl protease AED3 [Daucus carota subsp. sativus]
c37241.graph_c0	82	87	106	307	350	291	9.26	8.77	11.74	29.25	37.21	34.76	0.000108443	1.90298	up	--	--	--	--	--	--	--	--	S	Function unknown	PREDICTED: lysine-specific demethylase JMJ706-like isoform X3 [Daucus carota subsp. sativus]
c32110.graph_c0	51	40	83	206	175	258	5.91	4.14	9.44	20.12	19.06	31.58	0.001028	1.94958	up	--	--	Biological Process: phenylpropanoid biosynthetic process (GO:0009699);; Molecular Function: guiding stereospecific synthesis activity (GO:0042349);;	--	--	--	Dirigent-like protein	Dirigent protein 21 OS=Arabidopsis thaliana OX=3702 GN=DIR21 PE=3 SV=1	U	Intracellular trafficking, secretion, and vesicular transport	PREDICTED: dirigent protein 22-like [Daucus carota subsp. sativus]
c35337.graph_c0	31	3	7	0	0	0	5.89	0.52	1.32	0	0	0	0.00729036	-3.50778	down	[J]	Translation, ribosomal structure and biogenesis	Biological Process: ribosomal small subunit assembly (GO:0000028);; Biological Process: maturation of SSU-rRNA from tricistronic rRNA transcript (SSU-rRNA, 5.8S rRNA, LSU-rRNA) (GO:0000462);; Molecular Function: structural constituent of ribosome (GO:0003735);; Biological Process: translation (GO:0006412);; Cellular Component: cytosolic small ribosomal subunit (GO:0022627);; Molecular Function: m…	K02955|1.10884e-77|atr:18441266|K02955 small subunit ribosomal protein S14e | (RefSeq) 40S ribosomal protein S14	[J]	Translation, ribosomal structure and biogenesis	Ribosomal protein S11	40S ribosomal protein S14 OS=Zea mays OX=4577 PE=3 SV=1	J	Translation, ribosomal structure and biogenesis	40S ribosomal protein S14 [Zea mays]
c41312.graph_c0	19555	28312	33819	2596	4477	6104	1484.61	1879.38	2488.25	167.25	316.85	478.76	9.40383e-05	-2.2256	down	--	--	Cellular Component: photosystem I (GO:0009522);; Cellular Component: chloroplast thylakoid membrane (GO:0009535);; Biological Process: photosynthesis, light harvesting (GO:0009765);; Cellular Component: integral component of membrane (GO:0016021);; Molecular Function: chlorophyll binding (GO:0016168);; Biological Process: protein-chromophore linkage (GO:0018298);; Molecular Function: metal ion bi…	K08916|6.72268e-155|vvi:100246457|K08916 light-harvesting complex II chlorophyll a/b binding protein 5 | (RefSeq) chlorophyll a-b binding protein CP26, chloroplastic	--	--	Chlorophyll A-B binding protein	Chlorophyll a-b binding protein CP26, chloroplastic OS=Arabidopsis thaliana OX=3702 GN=LHCB5 PE=1 SV=1	S	Function unknown	PREDICTED: chlorophyll a-b binding protein CP26, chloroplastic-like [Daucus carota subsp. sativus]
c33041.graph_c0	43	17	37	8	2	1	3.35	1.17	3.32	0.54	0.14	0.08	0.00808252	-2.6102	down	--	--	--	--	--	--	C1 domain;; Zinc finger, ZZ type	Probable nucleoredoxin 1 OS=Arabidopsis thaliana OX=3702 GN=At1g60420 PE=1 SV=1	S	Function unknown	PREDICTED: uncharacterized protein LOC108218407 [Daucus carota subsp. sativus]
c30372.graph_c0	16	14	10	112	80	52	6.31	5.37	4.09	36.13	29.63	23.02	2.90824e-05	2.56049	up	[R]	General function prediction only	--	--	--	--	von Willebrand factor type A domain;; von Willebrand factor type A domain;; von Willebrand factor type A domain	E3 ubiquitin-protein ligase WAVH1 OS=Arabidopsis thaliana OX=3702 GN=WAVH1 PE=1 SV=1	S	Function unknown	PREDICTED: uncharacterized protein sll0103-like [Daucus carota subsp. sativus]
c41715.graph_c0	514	754	1140	83	179	177	26.26	33.05	56.81	3.52	8.63	9.45	0.00109813	-2.05357	down	--	--	Molecular Function: iron ion binding (GO:0005506);; Cellular Component: integral component of membrane (GO:0016021);;	--	--	--	--	--	S	Function unknown	PREDICTED: uncharacterized protein LOC108218388 [Daucus carota subsp. sativus]
c47514.graph_c0	263	212	179	76	38	32	7.94	5.53	5.51	2.03	1.09	1.05	0.000181936	-1.95632	down	--	--	--	--	--	--	Helix-loop-helix DNA-binding domain	Transcription factor bHLH87 OS=Arabidopsis thaliana OX=3702 GN=BHLH87 PE=1 SV=1	S	Function unknown	PREDICTED: transcription factor bHLH87-like [Daucus carota subsp. sativus]
c36598.graph_c0	492	1350	1009	58	123	150	54.11	132.44	108.92	5.38	12.71	17.38	1.86907e-05	-2.61446	down	[C]	Energy production and conversion	Molecular Function: electron carrier activity (GO:0009055);; Biological Process: electron transport chain (GO:0022900);; Molecular Function: metal ion binding (GO:0046872);; Molecular Function: 2 iron, 2 sulfur cluster binding (GO:0051537);;	K02639|2.35265e-47|vvi:100249080|K02639 ferredoxin | (RefSeq) ferredoxin-like	--	--	2Fe-2S iron-sulfur cluster binding domain	Ferredoxin-1, chloroplastic OS=Mesembryanthemum crystallinum OX=3544 PE=2 SV=1	C	Energy production and conversion	PREDICTED: ferredoxin, leaf L-A-like [Daucus carota subsp. sativus]
c50021.graph_c0	168	147	197	937	333	1401	9.17	6.81	9.03	43.53	17.1	80.92	7.13669e-05	2.41119	up	--	--	--	--	[R]	General function prediction only	Calcium-dependent channel, 7TM region, putative phosphate;; Late exocytosis, associated with Golgi transport;; Cytosolic domain of 10TM putative phosphate transporter	CSC1-like protein RXW8 OS=Arabidopsis thaliana OX=3702 GN=RXW8 PE=2 SV=1	S	Function unknown	PREDICTED: CSC1-like protein RXW8 isoform X2 [Daucus carota subsp. sativus]
c37782.graph_c0	262	376	278	59	53	37	11.17	13.85	12.12	2.08	2.12	1.6	4.04283e-07	-2.34255	down	[E]	Amino acid transport and metabolism	Molecular Function: oxidoreductase activity (GO:0016491);; Biological Process: oxidation-reduction process (GO:0055114);;	--	--	--	Saccharopine dehydrogenase NADP binding domain;; lactate/malate dehydrogenase, NAD binding domain;; NAD(P)H-binding;; NAD dependent epimerase/dehydratase family;; Semialdehyde dehydrogenase, NAD binding domain	--	E	Amino acid transport and metabolism	PREDICTED: uncharacterized protein LOC108193567 [Daucus carota subsp. sativus]
c43471.graph_c0	1451	2295	3927	57	78	136	103.26	143.47	271.43	3.45	5.25	10.15	2.92347e-14	-4.25815	down	[C]	Energy production and conversion	Biological Process: ATP biosynthetic process (GO:0006754);; Cellular Component: plastid envelope (GO:0009526);; Cellular Component: chloroplast thylakoid (GO:0009534);; Biological Process: photosynthetic electron transport chain (GO:0009767);; Biological Process: proton transport (GO:0015992);; Cellular Component: membrane (GO:0016020);;	K02113|6.98015e-103|sind:105158931|K02113 F-type H+-transporting ATPase subunit delta | (RefSeq) ATP synthase delta chain, chloroplastic-like	[C]	Energy production and conversion	ATP synthase delta (OSCP) subunit	ATP synthase delta chain, chloroplastic OS=Nicotiana tabacum OX=4097 GN=ATPD PE=2 SV=1	C	Energy production and conversion	PREDICTED: ATP synthase delta chain, chloroplastic-like [Daucus carota subsp. sativus]
c17115.graph_c0	14	20	67	128	194	145	0.65	0.85	3.17	5.27	8.85	7.26	0.00371956	2.18714	up	--	--	Molecular Function: protein serine/threonine phosphatase activity (GO:0004722);; Biological Process: protein dephosphorylation (GO:0006470);; Molecular Function: metal ion binding (GO:0046872);;	K14497|2.03269e-77|nnu:104601109|K14497 protein phosphatase 2C [EC:3.1.3.16] | (RefSeq) protein phosphatase 2C 37-like	[T]	Signal transduction mechanisms	Protein phosphatase 2C	Protein phosphatase 2C 3 OS=Arabidopsis thaliana OX=3702 GN=AIP1 PE=1 SV=1	T	Signal transduction mechanisms	PREDICTED: probable protein phosphatase 2C 24 [Daucus carota subsp. sativus]
c36896.graph_c0	72	164	61	241	327	256	4.81	9.48	3.91	13.44	20.23	17.56	0.00937993	1.6316	up	--	--	--	--	[DR]	--	MATH domain	Ubiquitin carboxyl-terminal hydrolase 12 OS=Arabidopsis thaliana OX=3702 GN=UBP12 PE=1 SV=2	S	Function unknown	PREDICTED: protein RESTRICTED TEV MOVEMENT 3-like [Daucus carota subsp. sativus]
c45524.graph_c0	272	224	275	64	75	44	14.4	10.36	14.13	2.87	3.73	2.42	0.000629115	-1.80939	down	[G]	Carbohydrate transport and metabolism	Cellular Component: chloroplast (GO:0009507);; Molecular Function: hydrolase activity (GO:0016787);;	--	--	--	Beta-lactamase superfamily domain	--	S	Function unknown	PREDICTED: uncharacterized protein LOC108200611 [Daucus carota subsp. sativus]
c45383.graph_c0	72	121	19	2	1	4	3.52	5.52	1.09	0.09	0.06	0.17	4.2227e-06	-3.91166	down	--	--	--	K09422|2.32885e-79|sly:101263611|K09422 myb proto-oncogene protein, plant | (RefSeq) SlMYB117; R2R3MYB transcription factor 117	[K]	Transcription	Myb-like DNA-binding domain;; Myb-like DNA-binding domain	Transcription factor MYB105 OS=Arabidopsis thaliana OX=3702 GN=MYB105 PE=1 SV=1	K	Transcription	PREDICTED: myb-related protein 330-like [Daucus carota subsp. sativus]
c32608.graph_c0	0	0	0	6	13	10	0	0	0	0.53	1.29	2.17	0.00625446	3.54219	up	--	--	Cellular Component: nucleus (GO:0005634);; Biological Process: multicellular organism development (GO:0007275);; Biological Process: SCF complex assembly (GO:0010265);; Biological Process: protein ubiquitination (GO:0016567);; Cellular Component: cell periphery (GO:0071944);;	K17263|2.55304e-39|sot:102603062|K17263 cullin-associated NEDD8-dissociated protein 1 | (RefSeq) cullin-associated NEDD8-dissociated protein 1	[R]	General function prediction only	--	Cullin-associated NEDD8-dissociated protein 1 OS=Arabidopsis thaliana OX=3702 GN=CAND1 PE=1 SV=1	O	Posttranslational modification, protein turnover, chaperones	hypothetical protein VITISV_022895 [Vitis vinifera]
c48282.graph_c0	385	683	253	1309	817	1270	9.79	14.99	6.18	28.74	19.42	33.04	0.00840143	1.50355	up	--	--	Biological Process: cell morphogenesis (GO:0000902);;	--	--	--	--	--	S	Function unknown	PREDICTED: uncharacterized protein LOC108192905 [Daucus carota subsp. sativus]
c40354.graph_c0	229	325	296	12	2	0	16.36	20.41	20.65	0.73	0.13	0	9.11232e-17	-5.31668	down	[G]	Carbohydrate transport and metabolism	Molecular Function: polygalacturonase activity (GO:0004650);; Cellular Component: extracellular region (GO:0005576);; Biological Process: carbohydrate metabolic process (GO:0005975);; Molecular Function: lyase activity (GO:0016829);; Biological Process: cell wall organization (GO:0071555);;	--	--	--	Glycosyl hydrolases family 28;; Pectate lyase superfamily protein;; Right handed beta helix region	Polygalacturonase At1g48100 OS=Arabidopsis thaliana OX=3702 GN=At1g48100 PE=2 SV=1	M	Cell wall/membrane/envelope biogenesis	PREDICTED: polygalacturonase At1g48100-like [Daucus carota subsp. sativus]
c44645.graph_c1	539	505	700	3191	1166	2558	14.2	10.6	16.06	66.43	26.16	63.88	6.41516e-05	2.02492	up	--	--	Molecular Function: metalloendopeptidase activity (GO:0004222);; Biological Process: proteolysis (GO:0006508);; Biological Process: cell adhesion (GO:0007155);; Cellular Component: integral component of membrane (GO:0016021);;	K01404|0|cit:102621178|K01404 leishmanolysin [EC:3.4.24.36] | (RefSeq) uncharacterized LOC102621178	[MV]	--	Leishmanolysin;; EGF-like domain	--	O	Posttranslational modification, protein turnover, chaperones	PREDICTED: leishmanolysin-like peptidase [Daucus carota subsp. sativus]
c47296.graph_c0	4257	5036	3991	9598	8159	10514	245.93	255.73	200.45	403.51	378.89	524.29	0.00876294	1.25857	up	--	--	--	--	[T]	Signal transduction mechanisms	BAG domain;; Ubiquitin family	BAG family molecular chaperone regulator 1 OS=Arabidopsis thaliana OX=3702 GN=BAG1 PE=1 SV=1	O	Posttranslational modification, protein turnover, chaperones	PREDICTED: BAG family molecular chaperone regulator 1-like [Daucus carota subsp. sativus]
c47920.graph_c0	754	1024	839	3051	1719	2748	20	23.96	21.35	72.71	43.14	79.97	0.000280842	1.6434	up	[G]	Carbohydrate transport and metabolism	Biological Process: trehalose biosynthetic process (GO:0005992);; Molecular Function: transferase activity (GO:0016740);;	K16055|0|pmum:103324895|K16055 trehalose 6-phosphate synthase/phosphatase [EC:2.4.1.15 3.1.3.12] | (RefSeq) probable alpha,alpha-trehalose-phosphate synthase [UDP-forming] 7	[G]	Carbohydrate transport and metabolism	Glycosyltransferase family 20;; Trehalose-phosphatase;; Trehalose-phosphatase	Probable alpha,alpha-trehalose-phosphate synthase [UDP-forming] 7 OS=Arabidopsis thaliana OX=3702 GN=TPS7 PE=1 SV=1	G	Carbohydrate transport and metabolism	PREDICTED: probable alpha,alpha-trehalose-phosphate synthase [UDP-forming] 7 [Daucus carota subsp. sativus]
c40903.graph_c0	714	567	760	294	211	182	37.95	26.36	39.24	13.29	10.53	10.03	0.0043716	-1.37928	down	--	--	--	--	--	--	PAP_fibrillin	Probable plastid-lipid-associated protein 3, chloroplastic OS=Arabidopsis thaliana OX=3702 GN=PAP3 PE=1 SV=1	S	Function unknown	PREDICTED: plastoglobulin-1, chloroplastic [Daucus carota subsp. sativus]
c47607.graph_c0	2051	2483	1757	6416	6016	5184	87.96	87.93	83.28	157.24	194.39	162.52	9.30703e-05	1.6328	up	--	--	Molecular Function: transcription factor activity, sequence-specific DNA binding (GO:0003700);; Biological Process: regulation of transcription, DNA-templated (GO:0006355);; Molecular Function: sequence-specific DNA binding (GO:0043565);;	--	--	--	bZIP transcription factor;; Basic region leucine zipper;; bZIP Maf transcription factor	Probable transcription factor PosF21 OS=Arabidopsis thaliana OX=3702 GN=POSF21 PE=2 SV=1	K	Transcription	PREDICTED: uncharacterized protein LOC108227565 [Daucus carota subsp. sativus]
c16329.graph_c0	46	1	6	0	0	0	9.7	0.2	1.26	0	0	0	0.00538698	-3.60717	down	[J]	Translation, ribosomal structure and biogenesis	Molecular Function: structural constituent of ribosome (GO:0003735);; Cellular Component: nucleolus (GO:0005730);; Biological Process: translation (GO:0006412);; Cellular Component: integral component of membrane (GO:0016021);; Cellular Component: cytosolic large ribosomal subunit (GO:0022625);; Molecular Function: large ribosomal subunit rRNA binding (GO:0070180);;	K02894|1.37542e-90|spen:107031682|K02894 large subunit ribosomal protein L23e | (RefSeq) 60S ribosomal protein L23	[J]	Translation, ribosomal structure and biogenesis	Ribosomal protein L14p/L23e	60S ribosomal protein L23 OS=Arabidopsis thaliana OX=3702 GN=RPL23A PE=2 SV=3	J	Translation, ribosomal structure and biogenesis	60S ribosomal protein L23 [Chenopodium quinoa]
c30365.graph_c0	34	1	8	0	0	0	2.61	0.05	0.55	0	0	0	0.00966173	-3.43905	down	[I]	Lipid transport and metabolism	Biological Process: lipid metabolic process (GO:0006629);; Cellular Component: chloroplast envelope (GO:0009941);; Biological Process: photoinhibition (GO:0010205);; Cellular Component: integral component of membrane (GO:0016021);;	K10255|0|ppp:PHYPADRAFT_222981|K10255 acyl-lipid omega-6 desaturase (Delta-12 desaturase) [EC:1.14.19.23 1.14.19.45] | (RefSeq) hypothetical protein	--	--	Fatty acid desaturase	Omega-6 fatty acid desaturase, chloroplastic OS=Arabidopsis thaliana OX=3702 GN=FAD6 PE=1 SV=2	I	Lipid transport and metabolism	hypothetical protein PHYPA_015816 [Physcomitrella patens]
c35302.graph_c0	110	14	116	13	4	1	14.57	1.69	15.16	1.44	0.49	0.14	0.000511519	-3.16301	down	--	--	--	--	--	--	Protein of unknown function (DUF640)	Protein LIGHT-DEPENDENT SHORT HYPOCOTYLS 6 OS=Arabidopsis thaliana OX=3702 GN=LSH6 PE=1 SV=1	S	Function unknown	unnamed protein product [Coffea canephora]
c43131.graph_c1	36	57	52	74	144	354	3.92	4.97	6.06	7.56	14.65	38.06	0.00647206	2.09205	up	[K]	Transcription	Molecular Function: nucleic acid binding (GO:0003676);; Biological Process: rRNA processing (GO:0006364);;	K07447|2.10271e-83|vvi:100266792|K07447 putative holliday junction resolvase [EC:3.1.-.-] | (RefSeq) putative pre-16S rRNA nuclease	--	--	Holliday junction resolvase	--	L	Replication, recombination and repair	PREDICTED: putative pre-16S rRNA nuclease isoform X1 [Daucus carota subsp. sativus]
c49064.graph_c0	1341	351	4209	25	23	19	58.95	13.39	179.05	0.93	0.95	0.87	1.22198e-16	-5.64627	down	[EF]	Amino acid transport and metabolism ;; Nucleotide transport and metabolism	Molecular Function: catalytic activity (GO:0003824);;	K00830|0|spen:107007093|K00830 alanine-glyoxylate transaminase / serine-glyoxylate transaminase / serine-pyruvate transaminase [EC:2.6.1.44 2.6.1.45 2.6.1.51] | (RefSeq) serine--glyoxylate aminotransferase	[R]	General function prediction only	Aminotransferase class-V	Serine--glyoxylate aminotransferase OS=Arabidopsis thaliana OX=3702 GN=AGT1 PE=1 SV=2	E	Amino acid transport and metabolism	PREDICTED: serine--glyoxylate aminotransferase-like [Daucus carota subsp. sativus]
c38972.graph_c0	199	114	148	574	277	501	10.75	5.56	8.33	26.88	14.59	29.21	0.00339224	1.62349	up	--	--	Molecular Function: peroxidase activity (GO:0004601);; Cellular Component: extracellular region (GO:0005576);; Biological Process: response to oxidative stress (GO:0006979);; Cellular Component: integral component of membrane (GO:0016021);; Molecular Function: heme binding (GO:0020037);; Biological Process: hydrogen peroxide catabolic process (GO:0042744);; Molecular Function: metal ion binding (…	K00430|1.89052e-180|sind:105165788|K00430 peroxidase [EC:1.11.1.7] | (RefSeq) peroxidase 47	--	--	Peroxidase	Peroxidase 47 OS=Arabidopsis thaliana OX=3702 GN=PER47 PE=2 SV=2	G	Carbohydrate transport and metabolism	PREDICTED: peroxidase 47 [Daucus carota subsp. sativus]
c34678.graph_c0	62	78	72	19	3	7	4.98	5.53	5.64	1.29	0.23	0.59	0.000456232	-2.53974	down	--	--	Cellular Component: plant-type cell wall (GO:0009505);;	--	--	--	Protein of unknown function (DUF1005)	--	S	Function unknown	PREDICTED: uncharacterized protein LOC108213018 [Daucus carota subsp. sativus]
c36217.graph_c0	135	1028	527	21	31	13	5.61	36.39	20.59	0.7	1.16	0.56	8.30101e-10	-4.04977	down	--	--	--	--	--	--	TCP family transcription factor	Transcription factor TCP12 OS=Arabidopsis thaliana OX=3702 GN=TCP12 PE=2 SV=1	K	Transcription	PREDICTED: transcription factor CYCLOIDEA-like [Daucus carota subsp. sativus]
c42131.graph_c0	250	245	269	659	846	616	6.32	5.53	8.49	13.93	19.39	19.12	0.00098396	1.61672	up	[H]	Coenzyme transport and metabolism	Biological Process: tetrahydrobiopterin biosynthetic process (GO:0006729);; Molecular Function: 4-alpha-hydroxytetrahydrobiopterin dehydratase activity (GO:0008124);;	K01724|3.13577e-43|nnu:104587686|K01724 4a-hydroxytetrahydrobiopterin dehydratase [EC:4.2.1.96] | (RefSeq) putative pterin-4-alpha-carbinolamine dehydratase	[K]	Transcription	Pterin 4 alpha carbinolamine dehydratase	Pterin-4-alpha-carbinolamine dehydratase 2, mitochondrial OS=Arabidopsis thaliana OX=3702 GN=PDL2 PE=1 SV=1	H	Coenzyme transport and metabolism	PREDICTED: putative pterin-4-alpha-carbinolamine dehydratase [Daucus carota subsp. sativus]
c43010.graph_c1	339	34	91	17	5	0	21.43	1.55	5.71	0.77	0.36	0	3.53115e-05	-3.69786	down	[Q]	Secondary metabolites biosynthesis, transport and catabolism	Molecular Function: iron ion binding (GO:0005506);; Molecular Function: oxidoreductase activity (GO:0016491);; Biological Process: oxidation-reduction process (GO:0055114);;	--	[QR]	--	2OG-Fe(II) oxygenase superfamily;; non-haem dioxygenase in morphine synthesis N-terminal	Gibberellin 20 oxidase 2 OS=Arabidopsis thaliana OX=3702 GN=GA20OX2 PE=2 SV=1	S	Function unknown	PREDICTED: gibberellin 20 oxidase 1-like [Daucus carota subsp. sativus]
c36465.graph_c0	46	3	15	0	0	0	3.64	0.21	1.16	0	0	0	0.000744914	-4.05728	down	--	--	--	--	--	--	--	--	S	Function unknown	DOMON domain containing protein [Klebsormidium nitens]
c52894.graph_c0	996	1176	856	3773	2388	3571	24.09	24.06	20.42	78.1	53.15	87.62	2.65163e-05	1.81258	up	[A]	RNA processing and modification	Molecular Function: polynucleotide adenylyltransferase activity (GO:0004652);; Cellular Component: nucleus (GO:0005634);; Biological Process: mRNA polyadenylation (GO:0006378);;	K14376|0|vvi:100263460|K14376 poly(A) polymerase [EC:2.7.7.19] | (RefSeq) nuclear poly(A) polymerase 4	[A]	RNA processing and modification	Poly(A) polymerase central domain;; Poly(A) polymerase predicted RNA binding domain;; Poly(A) polymerase central domain;; Nucleotidyltransferase domain	Nuclear poly(A) polymerase 4 OS=Arabidopsis thaliana OX=3702 GN=PAPS4 PE=1 SV=1	A	RNA processing and modification	PREDICTED: nuclear poly(A) polymerase 4-like [Daucus carota subsp. sativus]
c44322.graph_c0	286	1113	165	116	111	53	10.92	36.77	6.04	3.68	3.94	2.07	0.00584298	-2.06589	down	--	--	Molecular Function: lipid binding (GO:0008289);;	--	--	--	START domain	--	S	Function unknown	PREDICTED: PCTP-like protein [Daucus carota subsp. sativus]
c39901.graph_c0	493	281	89	15	8	13	28.88	14.17	4.97	0.88	0.41	0.76	5.46715e-10	-4.01209	down	--	--	Biological Process: flavonoid biosynthetic process (GO:0009813);; Molecular Function: chalcone isomerase activity (GO:0045430);;	--	--	--	Chalcone-flavanone isomerase;; Chalcone-flavanone isomerase	Probable chalcone--flavonone isomerase 3 OS=Arabidopsis thaliana OX=3702 GN=CHI3 PE=1 SV=1	S	Function unknown	PREDICTED: probable chalcone--flavonone isomerase 3 isoform X1 [Daucus carota subsp. sativus]
c51540.graph_c0	38	40	22	133	89	151	1.21	1.11	0.67	3.6	2.65	4.95	0.000834062	1.98637	up	[O]	Posttranslational modification, protein turnover, chaperones	Molecular Function: ATP binding (GO:0005524);; Biological Process: protein metabolic process (GO:0019538);;	K03695|3.3277e-24|gmx:100795424|K03695 ATP-dependent Clp protease ATP-binding subunit ClpB | (RefSeq) chaperone protein ClpB1-like	[O]	Posttranslational modification, protein turnover, chaperones	--	Chaperone protein ClpB1 OS=Oryza sativa subsp. japonica OX=39947 GN=CLPB1 PE=2 SV=1	O	Posttranslational modification, protein turnover, chaperones	Chaperone protein ClpB1 [Glycine soja]
c51607.graph_c1	43	69	8	0	0	1	18.81	29.96	3.66	0	0	0.49	1.83677e-05	-4.44847	down	[G]	Carbohydrate transport and metabolism	Cellular Component: extracellular region (GO:0005576);; Molecular Function: cellulase activity (GO:0008810);; Biological Process: cellulose catabolic process (GO:0030245);; Molecular Function: carbohydrate binding (GO:0030246);; Biological Process: cell wall organization (GO:0071555);;	--	--	--	Glycosyl hydrolase family 9	Endoglucanase 6 OS=Arabidopsis thaliana OX=3702 GN=At1g64390 PE=2 SV=2	G	Carbohydrate transport and metabolism	PREDICTED: endoglucanase 6 [Daucus carota subsp. sativus]
c29502.graph_c0	135	148	4	5	0	4	11.34	10.98	0.33	0.35	0	0.35	9.11808e-05	-3.82002	down	--	--	--	--	--	--	Protein of unknown function, DUF538	--	S	Function unknown	PREDICTED: uncharacterized protein LOC108208427 [Daucus carota subsp. sativus]
c41302.graph_c0	753	720	795	5500	6156	7683	45.29	37.93	45.75	262.7	328.44	449.54	1.35132e-13	3.19008	up	--	--	Cellular Component: integral component of membrane (GO:0016021);;	--	[S]	Function unknown	Ndr family;; Ndr family;; Ndr family	Protein NDL1 OS=Arabidopsis thaliana OX=3702 GN=NDL1 PE=1 SV=1	S	Function unknown	PREDICTED: pollen-specific protein SF21-like [Daucus carota subsp. sativus]
c36871.graph_c0	52	42	82	3	8	2	4.62	3.36	7.14	0.23	0.66	0.19	9.10068e-05	-3.12518	down	--	--	--	K09422|9.87458e-26|sind:105156372|K09422 myb proto-oncogene protein, plant | (RefSeq) transcription factor MYB24	[K]	Transcription	--	Transcription factor MYB62 OS=Arabidopsis thaliana OX=3702 GN=MYB62 PE=2 SV=1	K	Transcription	PREDICTED: transcription factor MYB108 [Daucus carota subsp. sativus]
c38782.graph_c0	788	478	1029	182	192	188	28.85	15.19	36.44	5.66	6.6	7.1	0.00154384	-1.75812	down	[I]	Lipid transport and metabolism	Cellular Component: chloroplast (GO:0009507);; Biological Process: isopentenyl diphosphate biosynthetic process, methylerythritol 4-phosphate pathway (GO:0019288);; Molecular Function: metal ion binding (GO:0046872);; Biological Process: dimethylallyl diphosphate biosynthetic process (GO:0050992);; Molecular Function: 4-hydroxy-3-methylbut-2-en-1-yl diphosphate reductase activity (GO:0051745);; B…	K03527|0|spen:107002698|K03527 4-hydroxy-3-methylbut-2-en-1-yl diphosphate reductase [EC:1.17.7.4] | (RefSeq) 4-hydroxy-3-methylbut-2-enyl diphosphate reductase, chloroplastic	--	--	LytB protein	4-hydroxy-3-methylbut-2-enyl diphosphate reductase, chloroplastic OS=Arabidopsis thaliana OX=3702 GN=ISPH PE=2 SV=1	I	Lipid transport and metabolism	PREDICTED: 4-hydroxy-3-methylbut-2-enyl diphosphate reductase, chloroplastic-like [Daucus carota subsp. sativus]
c46638.graph_c0	746	698	743	2033	2091	2051	32.14	28.48	35.16	64.16	79.6	92.79	0.000217055	1.64388	up	--	--	Cellular Component: chloroplast inner membrane (GO:0009706);; Biological Process: pollen wall assembly (GO:0010208);; Molecular Function: fatty acid transporter activity (GO:0015245);; Biological Process: lipid homeostasis (GO:0055088);; Biological Process: plant-type cell wall assembly (GO:0071668);; Biological Process: fatty acid transmembrane transport (GO:1902001);;	--	[S]	Function unknown	--	Protein FATTY ACID EXPORT 1, chloroplastic OS=Arabidopsis thaliana OX=3702 GN=FAX1 PE=1 SV=1	S	Function unknown	PREDICTED: protein FATTY ACID EXPORT 1, chloroplastic [Daucus carota subsp. sativus]
c40665.graph_c0	574	440	794	246	89	93	22.54	15.15	30.14	8.54	3.55	4.83	0.000472894	-1.91929	down	--	--	--	K09422|3.0381e-84|sind:105161483|K09422 myb proto-oncogene protein, plant | (RefSeq) transcription factor RAX2-like	[K]	Transcription	Myb-like DNA-binding domain;; Myb-like DNA-binding domain	Transcription factor MYB36 OS=Arabidopsis thaliana OX=3702 GN=MYB36 PE=1 SV=1	K	Transcription	PREDICTED: transcription factor RAX2-like [Daucus carota subsp. sativus]
c49166.graph_c0	272	9	54	0	0	1	9.56	0.42	1.89	0	0	0.03	0.00416512	-3.7205	down	[C]	Energy production and conversion	Molecular Function: ATP:ADP antiporter activity (GO:0005471);; Molecular Function: ATP binding (GO:0005524);; Biological Process: ADP transport (GO:0015866);; Biological Process: ATP transport (GO:0015867);; Cellular Component: integral component of membrane (GO:0016021);;	K03301|0|smo:SELMODRAFT_21240|K03301 ATP:ADP antiporter, AAA family | (RefSeq) hypothetical protein	--	--	TLC ATP/ADP transporter	ADP,ATP carrier protein 2, chloroplastic OS=Arabidopsis thaliana OX=3702 GN=AATP2 PE=1 SV=2	C	Energy production and conversion	hypothetical protein AXG93_3491s1200 [Marchantia polymorpha subsp. ruderalis]
c38680.graph_c0	1925	3964	3755	890	885	947	94.13	168.95	177.97	36.9	40.65	47.94	0.00363988	-1.54287	down	[E]	Amino acid transport and metabolism	Molecular Function: aminomethyltransferase activity (GO:0004047);; Cellular Component: mitochondrion (GO:0005739);; Biological Process: glycine catabolic process (GO:0006546);; Molecular Function: transaminase activity (GO:0008483);; Biological Process: methylation (GO:0032259);;	K00605|0|pmum:103324417|K00605 aminomethyltransferase [EC:2.1.2.10] | (RefSeq) aminomethyltransferase, mitochondrial	[E]	Amino acid transport and metabolism	Aminomethyltransferase folate-binding domain;; Glycine cleavage T-protein C-terminal barrel domain	Aminomethyltransferase, mitochondrial OS=Flaveria anomala OX=35877 GN=GDCST PE=3 SV=1	E	Amino acid transport and metabolism	PREDICTED: aminomethyltransferase, mitochondrial [Daucus carota subsp. sativus]
c35395.graph_c0	35	19	35	0	2	3	2.68	1.16	2.71	0	0.16	0.26	0.00175477	-3.13023	down	--	--	Molecular Function: enzyme inhibitor activity (GO:0004857);; Cellular Component: extracellular region (GO:0005576);; Cellular Component: cell wall (GO:0005618);; Molecular Function: pectinesterase activity (GO:0030599);; Biological Process: cell wall modification (GO:0042545);; Biological Process: negative regulation of catalytic activity (GO:0043086);; Molecular Function: aspartyl esterase activ…	K01051|7.32169e-34|nnu:104599379|K01051 pectinesterase [EC:3.1.1.11] | (RefSeq) probable pectinesterase/pectinesterase inhibitor 7	--	--	Pectinesterase;; pre-mRNA splicing factor component	Probable pectinesterase/pectinesterase inhibitor 20 OS=Arabidopsis thaliana OX=3702 GN=PME20 PE=2 SV=2	--	--	PREDICTED: probable pectinesterase/pectinesterase inhibitor 20 [Daucus carota subsp. sativus]
c46531.graph_c0	460	1084	932	90	18	22	13.45	27.42	26.33	2.24	0.49	0.66	4.53712e-12	-3.92684	down	[V]	Defense mechanisms	Molecular Function: ATP binding (GO:0005524);; Cellular Component: plasma membrane (GO:0005886);; Cellular Component: integral component of membrane (GO:0016021);; Molecular Function: ATPase activity, coupled to transmembrane movement of substances (GO:0042626);; Biological Process: transmembrane transport (GO:0055085);;	--	[Q]	Secondary metabolites biosynthesis, transport and catabolism	ABC-2 type transporter;; ABC transporter	ABC transporter G family member 5 OS=Arabidopsis thaliana OX=3702 GN=ABCG5 PE=2 SV=1	V	Defense mechanisms	PREDICTED: ABC transporter G family member 5 [Daucus carota subsp. sativus]
c43266.graph_c0	493	631	544	206	98	153	25.8	28.81	27.62	9.17	4.81	8.34	0.000481247	-1.65252	down	--	--	--	--	--	--	Transcriptional repressor, ovate;; DNA-binding domain	Transcription repressor OFP2 OS=Arabidopsis thaliana OX=3702 GN=OFP2 PE=1 SV=1	S	Function unknown	PREDICTED: transcription repressor OFP1-like [Daucus carota subsp. sativus]
c50623.graph_c0	2199	2292	2109	7180	4352	5163	65.36	58.27	60.39	181.05	122.73	157.43	0.000461474	1.45408	up	--	--	--	--	--	--	--	--	S	Function unknown	PREDICTED: uncharacterized protein LOC108204844 [Daucus carota subsp. sativus]
c49209.graph_c0	868	888	1253	264	61	142	27.39	24.26	38.79	6.97	1.77	4.53	4.27964e-06	-2.46973	down	--	--	--	--	--	--	NPH3 family	BTB/POZ domain-containing protein At3g19850 OS=Arabidopsis thaliana OX=3702 GN=At3g19850 PE=2 SV=1	S	Function unknown	PREDICTED: BTB/POZ domain-containing protein At1g50280 [Daucus carota subsp. sativus]
c40637.graph_c0	62	98	22	10	7	7	4.42	6	1.49	0.61	0.49	0.55	0.00258233	-2.43065	down	--	--	--	--	--	--	Epidermal patterning factor proteins	EPIDERMAL PATTERNING FACTOR-like protein 2 OS=Arabidopsis thaliana OX=3702 GN=EPFL2 PE=2 SV=1	S	Function unknown	PREDICTED: EPIDERMAL PATTERNING FACTOR-like protein 2 [Daucus carota subsp. sativus]
c42268.graph_c0	2078	5359	2275	619	778	698	128.1	289.71	136.16	32.39	45.11	44.73	0.000810285	-1.85778	down	[J]	Translation, ribosomal structure and biogenesis	Molecular Function: mRNA binding (GO:0003729);; Molecular Function: structural constituent of ribosome (GO:0003735);; Biological Process: translation (GO:0006412);; Cellular Component: chloroplast stroma (GO:0009570);; Cellular Component: thylakoid (GO:0009579);; Biological Process: response to cytokinin (GO:0009735);; Cellular Component: chloroplast envelope (GO:0009941);; Cellular Component: cy…	K02871|5.4215e-101|rcu:8271791|K02871 large subunit ribosomal protein L13 | (RefSeq) 50S ribosomal protein L13, chloroplastic	[J]	Translation, ribosomal structure and biogenesis	Ribosomal protein L13	50S ribosomal protein L13, chloroplastic OS=Arabidopsis thaliana OX=3702 GN=RPL13 PE=2 SV=1	J	Translation, ribosomal structure and biogenesis	PREDICTED: 50S ribosomal protein L13, chloroplastic-like [Daucus carota subsp. sativus]
c40265.graph_c0	812	2246	875	340	279	400	52.86	128.22	55.45	18.74	17.05	27.09	0.00762449	-1.61225	down	[J]	Translation, ribosomal structure and biogenesis	Molecular Function: structural constituent of ribosome (GO:0003735);; Cellular Component: ribosome (GO:0005840);; Biological Process: translation (GO:0006412);; Cellular Component: chloroplast (GO:0009507);; Molecular Function: rRNA binding (GO:0019843);;	K02867|1.6857e-92|nnu:104593315|K02867 large subunit ribosomal protein L11 | (RefSeq) 50S ribosomal protein L11, chloroplastic	[J]	Translation, ribosomal structure and biogenesis	Ribosomal protein L11, N-terminal domain;; Ribosomal protein L11, RNA binding domain	50S ribosomal protein L11, chloroplastic OS=Spinacia oleracea OX=3562 GN=rpl11 PE=1 SV=1	J	Translation, ribosomal structure and biogenesis	PREDICTED: 50S ribosomal protein L11, chloroplastic [Daucus carota subsp. sativus]
c51741.graph_c0	991	1613	1268	446	238	345	44.08	52.24	48.91	14.22	7.51	11.94	0.000253046	-1.68404	down	[K]	Transcription	Molecular Function: plastid sigma factor activity (GO:0001053);; Molecular Function: DNA binding (GO:0003677);; Molecular Function: transcription factor activity, sequence-specific DNA binding (GO:0003700);; Biological Process: DNA-templated transcription, initiation (GO:0006352);; Biological Process: regulation of transcription, DNA-templated (GO:0006355);; Biological Process: tRNA metabolic pro…	--	--	--	Sigma-70 factor, region 1.2;; Sigma-70 region 3;; Sigma-70, region 4	RNA polymerase sigma factor sigB OS=Arabidopsis thaliana OX=3702 GN=SIGB PE=2 SV=2	K	Transcription	PREDICTED: RNA polymerase sigma factor sigB-like, partial [Daucus carota subsp. sativus]
c38216.graph_c0	45	1	7	0	0	0	5.8	0.12	0.89	0	0	0	0.00493292	-3.62811	down	[J]	Translation, ribosomal structure and biogenesis	Molecular Function: structural constituent of ribosome (GO:0003735);; Biological Process: translation (GO:0006412);; Cellular Component: cytosolic large ribosomal subunit (GO:0022625);;	K02885|1.01851e-83|nnu:104598886|K02885 large subunit ribosomal protein L19e | (RefSeq) 60S ribosomal protein L19-3	[J]	Translation, ribosomal structure and biogenesis	Ribosomal protein L19e	60S ribosomal protein L19-3 OS=Arabidopsis thaliana OX=3702 GN=RPL19C PE=2 SV=3	J	Translation, ribosomal structure and biogenesis	60S ribosomal protein L19-1-like [Cucurbita maxima]
c53241.graph_c0	5	8	8	41	45	80	0.85	1.23	1.34	5.81	7.15	14.49	9.25001e-05	2.9002	up	--	--	--	--	[R]	General function prediction only	Reverse transcriptase-like	--	--	--	PREDICTED: uncharacterized protein LOC108199532 isoform X1 [Daucus carota subsp. sativus]
c41211.graph_c0	276	14	20	7	4	6	33.42	1.61	2.34	0.67	0.47	0.84	0.000779169	-3.29061	down	--	--	--	--	--	--	Protein of unknown function, DUF538	--	S	Function unknown	PREDICTED: uncharacterized protein LOC108208114 [Daucus carota subsp. sativus]
c48781.graph_c1	164	398	251	119	52	42	7.14	14.61	10.23	4.29	1.98	1.96	0.00415297	-1.72323	down	[H]	Coenzyme transport and metabolism	Molecular Function: prenyltransferase activity (GO:0004659);; Cellular Component: integral component of membrane (GO:0016021);; Biological Process: phylloquinone biosynthetic process (GO:0042372);;	K02548|1.05985e-83|pop:POPTR_0017s07770g|K02548 1,4-dihydroxy-2-naphthoate octaprenyltransferase [EC:2.5.1.74 2.5.1.-] | (RefSeq) POPTRDRAFT_1104883; hypothetical protein	[S]	Function unknown	--	2-carboxy-1,4-naphthoquinone phytyltransferase, chloroplastic OS=Arabidopsis thaliana OX=3702 GN=ABC4 PE=1 SV=2	H	Coenzyme transport and metabolism	hypothetical protein DCAR_003711 [Daucus carota subsp. sativus]
c44762.graph_c0	647	343	578	2742	2387	3658	59.03	27.66	51.68	212.01	205.73	351.8	2.54228e-07	2.55946	up	[O]	Posttranslational modification, protein turnover, chaperones	Molecular Function: ATP binding (GO:0005524);; Molecular Function: 2-alkenal reductase [NAD(P)] activity (GO:0032440);; Biological Process: oxidation-reduction process (GO:0055114);;	K03283|2.55617e-85|egr:104432002|K03283 heat shock 70kDa protein 1/8 | (RefSeq) probable mediator of RNA polymerase II transcription subunit 37c	[O]	Posttranslational modification, protein turnover, chaperones	Hsp70 protein	Heat shock cognate 70 kDa protein OS=Petunia hybrida OX=4102 GN=HSP70 PE=2 SV=1	O	Posttranslational modification, protein turnover, chaperones	hypothetical protein CISIN_1g020168mg [Citrus sinensis]
c39667.graph_c0	1565	1895	515	432	316	303	74.02	78.13	23.67	17.31	14.34	14.88	0.00685122	-1.63284	down	--	--	Molecular Function: 3-oxo-5-alpha-steroid 4-dehydrogenase activity (GO:0003865);; Molecular Function: enoyl-[acyl-carrier-protein] reductase (NADH) activity (GO:0004318);; Cellular Component: cytoplasm (GO:0005737);; Biological Process: lipid metabolic process (GO:0006629);; Cellular Component: integral component of membrane (GO:0016021);; Molecular Function: trans-2-enoyl-CoA reductase (NADPH) a…	K10258|0|mdm:103445586|K10258 very-long-chain enoyl-CoA reductase [EC:1.3.1.93] | (RefSeq) very-long-chain enoyl-CoA reductase	[I]	Lipid transport and metabolism	3-oxo-5-alpha-steroid 4-dehydrogenase	Very-long-chain enoyl-CoA reductase OS=Arabidopsis thaliana OX=3702 GN=ECR PE=1 SV=1	S	Function unknown	PREDICTED: very-long-chain enoyl-CoA reductase [Daucus carota subsp. sativus]
c48285.graph_c0	89	61	91	462	286	439	3.14	1.71	2.5	12.4	8.13	13.95	1.03003e-06	2.35728	up	--	--	Biological Process: transport (GO:0006810);; Cellular Component: membrane (GO:0016020);;	--	--	--	CorA-like Mg2+ transporter protein	--	S	Function unknown	PREDICTED: uncharacterized protein LOC108205658 [Daucus carota subsp. sativus]
c24632.graph_c0	84	92	233	3	1	0	3.66	3.49	9.83	0.11	0.04	0	2.55535e-12	-5.50031	down	--	--	Biological Process: anthocyanin-containing compound biosynthetic process (GO:0009718);; Cellular Component: intracellular membrane-bounded organelle (GO:0043231);; Biological Process: pigmentation (GO:0043473);; Biological Process: flavonoid glucuronidation (GO:0052696);; Molecular Function: quercetin 3-O-glucosyltransferase activity (GO:0080043);; Molecular Function: quercetin 7-O-glucosyltransf…	--	[GC]	--	UDP-glucoronosyl and UDP-glucosyl transferase	Anthocyanidin 3-O-glucoside 2&apos;&apos;-O-glucosyltransferase OS=Ipomoea nil OX=35883 GN=3GGT PE=1 SV=1	S	Function unknown	PREDICTED: anthocyanidin 3-O-glucoside 2&apos;&apos;-O-glucosyltransferase-like [Daucus carota subsp. sativus]
c43551.graph_c0	103	144	128	20	6	3	4.33	5.25	5.22	0.71	0.24	0.13	1.4748e-07	-3.334	down	--	--	--	--	--	--	Protein of unknown function (DUF1685)	--	S	Function unknown	PREDICTED: uncharacterized protein LOC108220604 [Daucus carota subsp. sativus]
c34034.graph_c1	27	5	9	0	0	0	1.61	0.26	0.52	0	0	0	0.00480672	-3.60917	down	--	--	Molecular Function: transporter activity (GO:0005215);; Biological Process: transport (GO:0006810);; Cellular Component: integral component of membrane (GO:0016021);;	--	[E]	Amino acid transport and metabolism	POT family;; POT family	Protein NRT1/ PTR FAMILY 4.6 OS=Arabidopsis thaliana OX=3702 GN=NPF4.6 PE=1 SV=1	E	Amino acid transport and metabolism	PREDICTED: protein NRT1/ PTR FAMILY 4.6-like [Daucus carota subsp. sativus]
c52449.graph_c0	212	479	334	86	44	98	2.26	4.39	3.43	0.78	0.44	1.07	0.00167097	-1.85535	down	[R]	General function prediction only	--	K03255|0|tcc:TCM_038439|K03255 protein TIF31 | (RefSeq) Tetratricopeptide repeat (TPR)-like superfamily protein isoform 1	[R]	General function prediction only	Tetratricopeptide repeat;; Tetratricopeptide repeat;; Translation initiation factor eIF3 subunit 135;; Mitochondrial function, CLU-N-term;; Clustered mitochondria	Protein TSS OS=Arabidopsis thaliana OX=3702 GN=TSS PE=1 SV=1	S	Function unknown	PREDICTED: protein TSS [Daucus carota subsp. sativus]
c44022.graph_c0	18	6	4	34	12	179	0.94	0.27	0.2	1.51	0.59	9.7	0.00647206	2.74232	up	[T]	Signal transduction mechanisms	Molecular Function: nucleotide binding (GO:0000166);; Molecular Function: protein kinase activity (GO:0004672);; Cellular Component: membrane (GO:0016020);; Biological Process: phosphorylation (GO:0016310);;	--	[T]	Signal transduction mechanisms	Protein kinase domain;; Protein tyrosine kinase	Mitogen-activated protein kinase kinase kinase 18 OS=Arabidopsis thaliana OX=3702 GN=MAPKKK18 PE=1 SV=1	T	Signal transduction mechanisms	PREDICTED: mitogen-activated protein kinase kinase kinase A-like [Daucus carota subsp. sativus]
c40144.graph_c0	233	169	191	737	308	588	8.25	5.17	6.71	22.4	10.42	21.88	0.004411	1.5337	up	--	--	--	--	--	--	PB1 domain	Protein NLP7 OS=Arabidopsis thaliana OX=3702 GN=NLP7 PE=1 SV=2	S	Function unknown	hypothetical protein DCAR_030924 [Daucus carota subsp. sativus]
c47908.graph_c0	7125	5928	13205	19356	32195	30241	227.24	164.17	407.86	523.65	961.86	994.49	0.00416512	1.759	up	--	--	--	--	--	--	Hs1pro-1 protein C-terminus;; Hs1pro-1 N-terminus	Nematode resistance protein-like HSPRO2 OS=Arabidopsis thaliana OX=3702 GN=HSPRO2 PE=1 SV=1	S	Function unknown	PREDICTED: nematode resistance protein-like HSPRO2 [Daucus carota subsp. sativus]
c44550.graph_c0	89	177	230	7	6	9	4.85	7.83	12.45	0.3	0.34	0.56	2.04336e-10	-3.94547	down	--	--	Molecular Function: hydrolase activity (GO:0016787);;	K01061|2.37694e-66|cit:102613358|K01061 carboxymethylenebutenolidase [EC:3.1.1.45] | (RefSeq) carboxymethylenebutenolidase homolog	[R]	General function prediction only	Dienelactone hydrolase family;; TAP-like protein	--	Q	Secondary metabolites biosynthesis, transport and catabolism	hypothetical protein DCAR_003529 [Daucus carota subsp. sativus]
c39407.graph_c0	316	526	646	52	67	81	30.86	45.63	61.67	4.28	6.14	8.35	2.8373e-06	-2.51735	down	--	--	Molecular Function: protein disulfide isomerase activity (GO:0003756);; Biological Process: protein folding (GO:0006457);; Cellular Component: chloroplast thylakoid membrane (GO:0009535);; Cellular Component: chloroplast stroma (GO:0009570);; Biological Process: photosystem II repair (GO:0010206);; Cellular Component: integral component of membrane (GO:0016021);; Molecular Function: heat shock pr…	--	--	--	--	Protein SPA, chloroplastic OS=Solanum lycopersicum OX=4081 GN=SPA PE=2 SV=1	S	Function unknown	PREDICTED: protein SPA, chloroplastic [Daucus carota subsp. sativus]
c45966.graph_c0	1564	3260	1823	410	478	470	74.15	130.25	87.99	13.85	18.28	21.73	7.7994e-05	-1.96006	down	[J]	Translation, ribosomal structure and biogenesis	Molecular Function: RNA binding (GO:0003723);; Molecular Function: structural constituent of ribosome (GO:0003735);; Cellular Component: ribosome (GO:0005840);; Biological Process: translation (GO:0006412);;	K02945|1.08497e-177|egr:104415264|K02945 small subunit ribosomal protein S1 | (RefSeq) 30S ribosomal protein S1, chloroplastic	--	--	S1 RNA binding domain	30S ribosomal protein S1, chloroplastic OS=Spinacia oleracea OX=3562 GN=RPS1 PE=1 SV=1	J	Translation, ribosomal structure and biogenesis	hypothetical protein DCAR_026969 [Daucus carota subsp. sativus]
c43027.graph_c1	1149	1843	2329	292	515	484	119.6	167.08	231.09	28.01	48.89	53.81	0.00480672	-1.6957	down	--	--	Cellular Component: chloroplast (GO:0009507);; Cellular Component: photosystem I reaction center (GO:0009538);; Biological Process: photosynthesis (GO:0015979);;	K02693|2.3001e-31|sot:102579876|K02693 photosystem I subunit IV | (RefSeq) photosystem I reaction center subunit IV A, chloroplastic	--	--	Photosystem I reaction centre subunit IV / PsaE	Photosystem I reaction center subunit IV A, chloroplastic OS=Nicotiana sylvestris OX=4096 GN=PSAEA PE=1 SV=1	C	Energy production and conversion	PREDICTED: photosystem I reaction center subunit IV, chloroplastic [Daucus carota subsp. sativus]
c39887.graph_c1	210	226	196	1053	436	563	12.92	12.22	11.72	54.88	25.21	36.03	0.000135975	1.74942	up	--	--	--	K13414|2.86886e-20|cit:102609376|K13414 mitogen-activated protein kinase kinase kinase 1 [EC:2.7.11.25] | (RefSeq) mitogen-activated protein kinase kinase kinase 1	[T]	Signal transduction mechanisms	--	Mitogen-activated protein kinase kinase kinase 9 OS=Arabidopsis thaliana OX=3702 GN=MEKK2 PE=1 SV=1	T	Signal transduction mechanisms	PREDICTED: mitogen-activated protein kinase kinase kinase 1-like [Daucus carota subsp. sativus]
c43649.graph_c0	1962	1318	1627	4257	5069	3158	111.57	65.51	89.85	205.09	270.57	186.36	0.00393366	1.47286	up	--	--	--	--	--	--	Stress-induced protein Di19, C-terminal;; Drought induced 19 protein (Di19), zinc-binding	Protein DEHYDRATION-INDUCED 19 homolog 3 OS=Arabidopsis thaliana OX=3702 GN=DI19-3 PE=1 SV=1	S	Function unknown	PREDICTED: protein DEHYDRATION-INDUCED 19 homolog 3 [Daucus carota subsp. sativus]
c36120.graph_c0	194	122	242	9	16	12	10.33	5.59	12.49	0.69	0.79	0.66	5.78603e-09	-3.44294	down	[O]	Posttranslational modification, protein turnover, chaperones	Cellular Component: integral component of membrane (GO:0016021);;	--	--	--	--	--	S	Function unknown	PREDICTED: uncharacterized protein LOC108214197 [Daucus carota subsp. sativus]
c33971.graph_c1	321	67	683	1393	2616	1719	47.41	8.87	97.5	175.59	370.23	275.94	0.00284617	2.34692	up	--	--	Cellular Component: nucleus (GO:0005634);; Biological Process: regulation of transcription, DNA-templated (GO:0006355);; Biological Process: auxin-activated signaling pathway (GO:0009734);;	K14484|1.6993e-42|rcu:8271342|K14484 auxin-responsive protein IAA | (RefSeq) auxin-responsive protein IAA1	--	--	AUX/IAA family	Auxin-responsive protein IAA1 OS=Oryza sativa subsp. japonica OX=39947 GN=IAA1 PE=2 SV=1	S	Function unknown	PREDICTED: auxin-responsive protein IAA1-like [Daucus carota subsp. sativus]
c48151.graph_c0	331	233	305	48	23	35	13.75	8.45	12.3	1.71	0.89	1.48	1.59125e-08	-2.76157	down	--	--	--	--	--	--	--	--	S	Function unknown	PREDICTED: uncharacterized protein LOC108216328 [Daucus carota subsp. sativus]
c40188.graph_c0	50	202	60	9	17	13	2.81	9.91	3.27	0.43	0.9	0.76	0.00155021	-2.44192	down	--	--	Cellular Component: chloroplast (GO:0009507);; Cellular Component: membrane (GO:0016020);;	K13347|7.11354e-96|pop:POPTR_0006s03100g|K13347 peroxisomal membrane protein 2 | (RefSeq) POPTRDRAFT_818987; hypothetical protein	[R]	General function prediction only	Mpv17 / PMP22 family	--	S	Function unknown	PREDICTED: protein sym-1 [Daucus carota subsp. sativus]
c50616.graph_c1	483	554	368	140	144	103	46.94	47.72	35.05	11.57	13.19	10.51	0.000887691	-1.60263	down	[R]	General function prediction only	Molecular Function: phosphodiesterase I activity (GO:0004528);; Cellular Component: vacuole (GO:0005773);; Cellular Component: integral component of membrane (GO:0016021);; Biological Process: nucleic acid phosphodiester bond hydrolysis (GO:0090305);;	K01513|2.77064e-73|jcu:105637870|K01513 ectonucleotide pyrophosphatase/phosphodiesterase family member 1/3 [EC:3.1.4.1 3.6.1.9] | (RefSeq) venom phosphodiesterase 2	[R]	General function prediction only	Type I phosphodiesterase / nucleotide pyrophosphatase	--	S	Function unknown	PREDICTED: ectonucleotide pyrophosphatase/phosphodiesterase family member 3-like [Daucus carota subsp. sativus]
c40770.graph_c0	11	16	22	0	0	0	0.41	0.54	0.77	0	0	0	0.000956413	-3.97017	down	[G]	Carbohydrate transport and metabolism	Cellular Component: chloroplast (GO:0009507);; Biological Process: flavonoid biosynthetic process (GO:0009813);; Biological Process: flavonoid glucuronidation (GO:0052696);; Molecular Function: quercetin 3-O-glucosyltransferase activity (GO:0080043);; Molecular Function: quercetin 7-O-glucosyltransferase activity (GO:0080044);;	--	[GC]	--	UDP-glucoronosyl and UDP-glucosyl transferase	Crocetin glucosyltransferase, chloroplastic OS=Gardenia jasminoides OX=114476 GN=UGT75L6 PE=1 SV=1	S	Function unknown	PREDICTED: crocetin glucosyltransferase, chloroplastic-like [Daucus carota subsp. sativus]
c48765.graph_c0	217	233	342	1560	1382	2525	3.9	3.93	5.83	26.04	24.26	49.53	1.12923e-08	2.85951	up	--	--	--	--	[I]	Lipid transport and metabolism	CRAL/TRIO domain	--	S	Function unknown	hypothetical protein DCAR_016038 [Daucus carota subsp. sativus]
c47878.graph_c0	525	483	615	5196	2434	2013	23.94	18.79	27.55	195.44	104.16	92.93	3.56473e-09	2.55675	up	--	--	Molecular Function: calmodulin-dependent protein kinase activity (GO:0004683);; Molecular Function: calcium ion binding (GO:0005509);; Molecular Function: calmodulin binding (GO:0005516);; Molecular Function: ATP binding (GO:0005524);; Cellular Component: nucleus (GO:0005634);; Cellular Component: cytoplasm (GO:0005737);; Cellular Component: plasma membrane (GO:0005886);; Biological Process: absc…	K13412|4.67539e-51|gra:105777826|K13412 calcium-dependent protein kinase [EC:2.7.11.1] | (RefSeq) calcium-dependent protein kinase 28-like	[T]	Signal transduction mechanisms	EF hand	Calcium-dependent protein kinase 16 OS=Arabidopsis thaliana OX=3702 GN=CPK16 PE=1 SV=1	T	Signal transduction mechanisms	PREDICTED: calcium-dependent protein kinase 28 [Daucus carota subsp. sativus]
c51988.graph_c1	1098	1288	1101	3010	3504	1915	48.94	48.79	45.45	107.9	139.86	84.06	0.00414384	1.41155	up	[T]	Signal transduction mechanisms	Molecular Function: calmodulin-dependent protein kinase activity (GO:0004683);; Molecular Function: calcium ion binding (GO:0005509);; Molecular Function: calmodulin binding (GO:0005516);; Molecular Function: ATP binding (GO:0005524);; Cellular Component: nucleus (GO:0005634);; Cellular Component: cytoplasm (GO:0005737);; Biological Process: abscisic acid-activated signaling pathway (GO:0009738);…	K13412|1.48424e-114|mtr:MTR_5g092810|K13412 calcium-dependent protein kinase [EC:2.7.11.1] | (RefSeq) calcium-dependent kinase	[T]	Signal transduction mechanisms	Protein kinase domain;; Protein tyrosine kinase;; EF hand;; EF-hand domain pair;; EF-hand domain pair;; EF-hand domain;; EF hand;; Cytoskeletal-regulatory complex EF hand;; Secreted protein acidic and rich in cysteine Ca binding region;; EF-hand domain	Calcium-dependent protein kinase 21 OS=Arabidopsis thaliana OX=3702 GN=CPK21 PE=1 SV=1	T	Signal transduction mechanisms	PREDICTED: calcium-dependent protein kinase 2-like [Daucus carota subsp. sativus]
c47679.graph_c0	2558	2696	2977	5452	6614	6242	71.68	64.42	88.78	132.56	187.34	192.97	0.00890397	1.32204	up	--	--	Cellular Component: intracellular (GO:0005622);; Biological Process: vacuolar transport (GO:0007034);;	K12191|2.2344e-49|mus:103996837|K12191 charged multivesicular body protein 2A | (RefSeq) vacuolar protein sorting-associated protein 2 homolog 1	[U]	Intracellular trafficking, secretion, and vesicular transport	Ring finger domain;; Zinc finger, C3HC4 type (RING finger);; RING-like zinc finger;; Zinc finger, C3HC4 type (RING finger);; RING-H2 zinc finger domain;; RING-type zinc-finger;; Anaphase-promoting complex subunit 11 RING-H2 finger;; Snf7	Vacuolar protein sorting-associated protein 2 homolog 1 OS=Arabidopsis thaliana OX=3702 GN=VPS2.1 PE=1 SV=2	N	Cell motility	PREDICTED: E3 ubiquitin-protein ligase RING1-like [Daucus carota subsp. sativus]
c51758.graph_c0	3376	3899	2731	14877	7556	7682	61.22	62.71	46.14	212.01	121.38	133.58	7.46058e-05	1.66723	up	[N]	Cell motility	Cellular Component: integral component of membrane (GO:0016021);; Molecular Function: cellulose synthase (UDP-forming) activity (GO:0016760);; Biological Process: cellulose biosynthetic process (GO:0030244);; Biological Process: cell wall organization (GO:0071555);;	K20924|0|vvi:100261385|K20924 cellulose synthase-like protein [EC:2.4.1.-] | (RefSeq) cellulose synthase-like protein D3	--	--	Cellulose synthase;; RING/Ubox like zinc-binding domain;; Glycosyl transferase family group 2	Cellulose synthase-like protein D3 OS=Arabidopsis thaliana OX=3702 GN=CSLD3 PE=1 SV=1	M	Cell wall/membrane/envelope biogenesis	PREDICTED: cellulose synthase-like protein D3 [Daucus carota subsp. sativus]
c47606.graph_c0	2734	1971	3311	11155	14306	18853	97.92	59.18	121.17	314.83	523.91	749.72	4.25802e-07	2.56423	up	--	--	Cellular Component: endoplasmic reticulum (GO:0005783);; Biological Process: intracellular protein transport (GO:0006886);; Cellular Component: integral component of membrane (GO:0016021);;	K14009|4.42326e-38|thj:104820464|K14009 B-cell receptor-associated protein 31 | (RefSeq) B-cell receptor-associated protein 31	[V]	Defense mechanisms	--	--	S	Function unknown	PREDICTED: uncharacterized protein LOC108224561 [Daucus carota subsp. sativus]
c50216.graph_c0	46	47	40	92	95	358	1.09	0.98	0.95	1.86	2.12	8.79	0.00524397	2.12701	up	[G]	Carbohydrate transport and metabolism	Molecular Function: catalytic activity (GO:0003824);;	--	--	--	AAA domain	P-loop NTPase domain-containing protein LPA1 homolog 2 OS=Arabidopsis thaliana OX=3702 GN=At3g45090 PE=2 SV=1	G	Carbohydrate transport and metabolism	PREDICTED: P-loop NTPase domain-containing protein LPA1 homolog 2 [Daucus carota subsp. sativus]
c39479.graph_c0	196	49	114	31	4	12	15.65	3.48	8.89	2.14	0.31	0.99	0.000970916	-2.5972	down	--	--	Molecular Function: DNA binding (GO:0003677);; Molecular Function: transcription factor activity, sequence-specific DNA binding (GO:0003700);; Cellular Component: nucleus (GO:0005634);; Biological Process: regulation of transcription, DNA-templated (GO:0006355);;	K14516|3.3391e-72|nnu:104610030|K14516 ethylene-responsive transcription factor 1 | (RefSeq) ethylene-responsive transcription factor 1B-like	--	--	AP2 domain	Ethylene-responsive transcription factor 1B OS=Arabidopsis thaliana OX=3702 GN=ERF1B PE=1 SV=2	K	Transcription	PREDICTED: ethylene-responsive transcription factor 1B-like [Daucus carota subsp. sativus]
c35170.graph_c1	20	41	8	0	0	0	1.09	1.95	0.42	0	0	0	0.000185741	-4.2961	down	--	--	Molecular Function: transferase activity (GO:0016740);;	K13495|1.26322e-122|vvi:100262460|K13495 cis-zeatin O-glucosyltransferase [EC:2.4.1.215] | (RefSeq) zeatin O-glucosyltransferase-like	[GC]	--	UDP-glucoronosyl and UDP-glucosyl transferase	Zeatin O-glucosyltransferase OS=Phaseolus lunatus OX=3884 GN=ZOG1 PE=2 SV=1	S	Function unknown	PREDICTED: zeatin O-glucosyltransferase-like [Daucus carota subsp. sativus]
c49103.graph_c0	1320	1208	1063	144	71	142	56.22	42.42	42.51	4.88	3.44	6.07	8.26555e-12	-3.02799	down	[R]	General function prediction only	Molecular Function: ATP binding (GO:0005524);; Molecular Function: ATPase activity (GO:0016887);;	--	[R]	General function prediction only	ABC transporter;; ABC transporter;; AAA domain, putative AbiEii toxin, Type IV TA system;; ATPase family associated with various cellular activities (AAA)	ABC transporter F family member 5 OS=Arabidopsis thaliana OX=3702 GN=ABCF5 PE=2 SV=1	S	Function unknown	PREDICTED: ABC transporter F family member 5 [Daucus carota subsp. sativus]
c49563.graph_c0	29	60	41	0	0	4	0.92	1.64	1.25	0	0	0.13	5.71867e-05	-3.78127	down	--	--	--	--	[R]	General function prediction only	PPR repeat family;; PPR repeat;; DYW family of nucleic acid deaminases;; PPR repeat;; Pentatricopeptide repeat domain	Pentatricopeptide repeat-containing protein At5g48910 OS=Arabidopsis thaliana OX=3702 GN=PCMP-H38 PE=2 SV=1	S	Function unknown	PREDICTED: pentatricopeptide repeat-containing protein At5g66520-like [Daucus carota subsp. sativus]
c41657.graph_c0	203	198	242	0	0	1	8.36	7.09	9.65	0	0	0.04	2.79513e-18	-6.96398	down	[Q]	Secondary metabolites biosynthesis, transport and catabolism	Cellular Component: cytosol (GO:0005829);; Molecular Function: S-adenosylmethionine-dependent methyltransferase activity (GO:0008757);; Biological Process: methylation (GO:0032259);;	--	--	--	Leucine carboxyl methyltransferase	--	Q	Secondary metabolites biosynthesis, transport and catabolism	PREDICTED: putative S-adenosyl-L-methionine-dependent methyltransferase MAB_0213c isoform X1 [Daucus carota subsp. sativus]
c31225.graph_c0	977	1152	976	355	301	337	84.2	87.75	82.11	25.91	24.35	30.39	0.00200734	-1.40204	down	--	--	Cellular Component: plasma membrane (GO:0005886);; Molecular Function: zinc ion binding (GO:0008270);; Cellular Component: integral component of membrane (GO:0016021);; Molecular Function: cellulose synthase (UDP-forming) activity (GO:0016760);; Biological Process: cellulose biosynthetic process (GO:0030244);; Biological Process: cell wall organization (GO:0071555);;	K10999|6.97204e-75|sind:105159398|K10999 cellulose synthase A [EC:2.4.1.12] | (RefSeq) cellulose synthase A catalytic subunit 2 [UDP-forming]-like	--	--	Cellulose synthase	Probable cellulose synthase A catalytic subunit 9 [UDP-forming] OS=Arabidopsis thaliana OX=3702 GN=CESA9 PE=2 SV=1	M	Cell wall/membrane/envelope biogenesis	PREDICTED: cellulose synthase A catalytic subunit 5 [UDP-forming]-like isoform X1 [Daucus carota subsp. sativus]
c52716.graph_c0	1129	1394	1330	5652	4384	5771	21.02	24.5	26.17	94.55	96.14	116.4	1.4377e-07	2.16125	up	[K]	Transcription	Cellular Component: membrane (GO:0016020);;	--	--	--	Leucine rich repeat;; Leucine Rich repeats (2 copies);; Protein tyrosine kinase;; Leucine Rich Repeat;; Protein kinase domain;; Leucine Rich repeat	Probable LRR receptor-like serine/threonine-protein kinase At2g16250 OS=Arabidopsis thaliana OX=3702 GN=At2g16250 PE=2 SV=1	S	Function unknown	PREDICTED: probable LRR receptor-like serine/threonine-protein kinase At2g16250 [Daucus carota subsp. sativus]
c16322.graph_c1	20	15	29	260	409	96	7.94	5.79	11.94	84.66	152.65	42.78	3.32515e-08	3.44789	up	--	--	--	--	--	--	--	--	S	Function unknown	hypothetical protein DCAR_028559 [Daucus carota subsp. sativus]
c40371.graph_c0	5362	16679	463	513	508	1100	318.1	894.14	26.32	26.77	28.99	70.38	0.0027358	-2.66235	down	[G]	Carbohydrate transport and metabolism	Molecular Function: hydrolase activity, hydrolyzing O-glycosyl compounds (GO:0004553);; Cellular Component: cell wall (GO:0005618);; Biological Process: xyloglucan metabolic process (GO:0010411);; Molecular Function: xyloglucan:xyloglucosyl transferase activity (GO:0016762);; Molecular Function: carbohydrate binding (GO:0030246);; Biological Process: cell wall biogenesis (GO:0042546);; Cellular C…	K08235|0|sind:105177854|K08235 xyloglucan:xyloglucosyl transferase [EC:2.4.1.207] | (RefSeq) probable xyloglucan endotransglucosylase/hydrolase protein 7	--	--	Glycosyl hydrolases family 16;; Xyloglucan endo-transglycosylase (XET) C-terminus	Probable xyloglucan endotransglucosylase/hydrolase protein 7 OS=Arabidopsis thaliana OX=3702 GN=XTH7 PE=2 SV=2	G	Carbohydrate transport and metabolism	PREDICTED: probable xyloglucan endotransglucosylase/hydrolase protein 7 [Daucus carota subsp. sativus]
c44989.graph_c0	22	38	43	151	221	343	0.61	0.93	1.51	4.83	8.55	15.26	1.75183e-06	2.85267	up	--	--	--	--	--	--	Agenet domain;; Domain of unknown function (DUF4537);; Agenet domain	DUF724 domain-containing protein 3 OS=Arabidopsis thaliana OX=3702 GN=DUF3 PE=1 SV=1	S	Function unknown	PREDICTED: uncharacterized protein LOC108197345 isoform X2 [Daucus carota subsp. sativus]
c48147.graph_c0	1626	1864	1784	6846	7190	2413	128.78	124.64	132.65	482.8	555.32	214.97	0.0017363	1.71006	up	--	--	Molecular Function: serine-type endopeptidase activity (GO:0004252);; Biological Process: proteolysis (GO:0006508);; Cellular Component: plasmodesma (GO:0009506);; Cellular Component: integral component of membrane (GO:0016021);;	--	[T]	Signal transduction mechanisms	Rhomboid family;; Rhomboid family	RHOMBOID-like protein 2 OS=Arabidopsis thaliana OX=3702 GN=RBL2 PE=1 SV=1	S	Function unknown	PREDICTED: RHOMBOID-like protein 3 [Daucus carota subsp. sativus]
c44291.graph_c0	62	89	96	10	9	12	2.41	3	3.61	0.33	0.33	0.48	6.22527e-05	-2.58562	down	--	--	Molecular Function: zinc ion binding (GO:0008270);;	--	[R]	General function prediction only	DYW family of nucleic acid deaminases;; PPR repeat;; PPR repeat family;; PPR repeat;; Pentatricopeptide repeat domain	Pentatricopeptide repeat-containing protein At2g15690, mitochondrial OS=Arabidopsis thaliana OX=3702 GN=PCMP-H66 PE=1 SV=2	S	Function unknown	PREDICTED: pentatricopeptide repeat-containing protein At2g15690-like [Daucus carota subsp. sativus]
c32886.graph_c0	45	33	21	6	1	1	4.45	2.89	2.03	0.5	0.09	0.1	0.00172103	-2.96985	down	--	--	--	--	--	--	Plant protein 1589 of unknown function (A_thal_3526)	--	S	Function unknown	PREDICTED: uncharacterized protein LOC108198696 [Daucus carota subsp. sativus]
c53078.graph_c0	405	329	383	1112	997	977	4.94	3.24	4.76	9.54	10.63	10.29	0.000382348	1.59453	up	--	--	--	--	[O]	Posttranslational modification, protein turnover, chaperones	Ring finger domain;; Zinc finger, C3HC4 type (RING finger);; RING-like zinc finger;; Zinc finger, C3HC4 type (RING finger);; RING-H2 zinc finger domain;; RING-type zinc-finger	E3 ubiquitin-protein ligase MBR1 OS=Arabidopsis thaliana OX=3702 GN=MBR1 PE=1 SV=1	O	Posttranslational modification, protein turnover, chaperones	PREDICTED: hornerin-like isoform X1 [Daucus carota subsp. sativus]
c49723.graph_c0	3099	795	2200	316	365	157	87.98	19.38	59.77	7.55	9.94	4.64	3.80898e-05	-2.53386	down	[O]	Posttranslational modification, protein turnover, chaperones	--	--	--	--	Tetratricopeptide repeat	--	S	Function unknown	PREDICTED: uncharacterized protein LOC108209891 [Daucus carota subsp. sativus]
c37330.graph_c1	0	0	0	5	1	46	0	0	0	0.47	0.1	5.35	0.00188895	3.88362	up	--	--	Molecular Function: aspartic-type endopeptidase activity (GO:0004190);; Biological Process: proteolysis (GO:0006508);; Biological Process: protein catabolic process (GO:0030163);;	--	--	--	--	--	O	Posttranslational modification, protein turnover, chaperones	PREDICTED: aspartic proteinase CDR1-like isoform X2 [Daucus carota subsp. sativus]
c48263.graph_c0	87	115	33	18	8	6	4.94	5.87	2.06	0.84	0.46	0.45	0.000824438	-2.48587	down	--	--	--	--	--	--	--	Protein SINE1 OS=Arabidopsis thaliana OX=3702 GN=SINE1 PE=1 SV=1	S	Function unknown	PREDICTED: uncharacterized protein LOC108225609 [Daucus carota subsp. sativus]
c51904.graph_c0	203	633	73	85	19	44	4.96	12.92	1.68	1.89	0.44	1.05	0.00590935	-2.21868	down	--	--	--	--	--	--	--	--	S	Function unknown	PREDICTED: uncharacterized protein LOC108193396 [Daucus carota subsp. sativus]
c36398.graph_c0	2	5	19	60	88	29	0.11	0.24	0.74	2.01	2.85	1.07	0.00506265	2.52983	up	[QV]	Secondary metabolites biosynthesis, transport and catabolism ;; Defense mechanisms	Molecular Function: monooxygenase activity (GO:0004497);; Molecular Function: iron ion binding (GO:0005506);; Molecular Function: oxidoreductase activity, acting on paired donors, with incorporation or reduction of molecular oxygen (GO:0016705);; Molecular Function: heme binding (GO:0020037);; Biological Process: oxidation-reduction process (GO:0055114);;	K09843|0|pmum:103335270|K09843 (+)-abscisic acid 8'-hydroxylase [EC:1.14.13.93] | (RefSeq) abscisic acid 8'-hydroxylase 4	[QI]	--	Cytochrome P450;; Cytochrome P450	Abscisic acid 8&apos;-hydroxylase 4 OS=Arabidopsis thaliana OX=3702 GN=CYP707A4 PE=2 SV=2	Q	Secondary metabolites biosynthesis, transport and catabolism	abscisic acid 8&apos;-hydroxylase 4-like [Daucus carota subsp. sativus]
c46761.graph_c0	803	503	824	1546	1826	2151	40.67	24.42	42.51	69.74	93.43	126.42	0.00709603	1.51697	up	--	--	Molecular Function: nucleotide binding (GO:0000166);; Molecular Function: nucleic acid binding (GO:0003676);; Biological Process: response to cytokinin (GO:0009735);;	--	--	--	--	Binding partner of ACD11 1 OS=Arabidopsis thaliana OX=3702 GN=BPA1 PE=1 SV=1	S	Function unknown	PREDICTED: binding partner of ACD11 1 [Daucus carota subsp. sativus]
c32282.graph_c0	83	54	82	333	306	220	4.77	2.72	4.58	16.23	16.52	13.13	4.59799e-05	2.0367	up	--	--	Cellular Component: integral component of membrane (GO:0016021);;	--	[S]	Function unknown	TLC domain	--	U	Intracellular trafficking, secretion, and vesicular transport	PREDICTED: TLC domain-containing protein 2 [Daucus carota subsp. sativus]
c43235.graph_c0	582	457	726	141	111	86	22.03	15.28	26.8	4.67	4.06	3.49	3.589e-06	-2.1531	down	--	--	Molecular Function: protein serine/threonine phosphatase activity (GO:0004722);; Biological Process: protein dephosphorylation (GO:0006470);; Molecular Function: metal ion binding (GO:0046872);;	--	[T]	Signal transduction mechanisms	Protein phosphatase 2C	Protein phosphatase 2C 57 OS=Arabidopsis thaliana OX=3702 GN=PPH1 PE=1 SV=2	T	Signal transduction mechanisms	PREDICTED: protein phosphatase 2C 57 [Daucus carota subsp. sativus]
c40234.graph_c0	2694	2303	2590	398	270	121	304.94	233.7	287.16	38.21	28.78	14.52	3.83892e-11	-3.02725	down	--	--	--	--	--	--	--	--	--	--	hypothetical protein DCAR_029508 [Daucus carota subsp. sativus]
c41278.graph_c1	10	15	29	51	178	201	1.91	2.74	5.52	8.2	32.17	41.54	7.11119e-05	2.94655	up	[J]	Translation, ribosomal structure and biogenesis	Molecular Function: nucleotide binding (GO:0000166);; Molecular Function: nucleic acid binding (GO:0003676);;	K12890|1.44136e-51|sbi:SORBI_03g013010|K12890 splicing factor, arginine/serine-rich 1 | (RefSeq) SORBIDRAFT_03g013010, Sb03g013010; hypothetical protein	[A]	RNA processing and modification	RNA recognition motif. (a.k.a. RRM, RBD, or RNP domain)	Serine/arginine-rich-splicing factor SR34 OS=Arabidopsis thaliana OX=3702 GN=SR34 PE=1 SV=1	S	Function unknown	PREDICTED: serine/arginine-rich splicing factor SR30-like isoform X2 [Daucus carota subsp. sativus]
c41747.graph_c0	1004	344	153	62	35	121	33.57	9.06	4.91	1.81	1.08	3.65	0.00403757	-2.28984	down	--	--	Cellular Component: integral component of membrane (GO:0016021);;	--	--	--	Nodulin-like	Protein NUCLEAR FUSION DEFECTIVE 4 OS=Arabidopsis thaliana OX=3702 GN=NFD4 PE=3 SV=1	S	Function unknown	PREDICTED: protein NUCLEAR FUSION DEFECTIVE 4-like [Daucus carota subsp. sativus]
c30744.graph_c0	22	59	21	1	1	5	3.62	8.99	3.42	0.14	0.15	0.88	0.00333804	-2.9215	down	--	--	Biological Process: fatty acid biosynthetic process (GO:0006633);; Molecular Function: thiolester hydrolase activity (GO:0016790);;	K10782|2.13986e-43|cit:102607356|K10782 fatty acyl-ACP thioesterase A [EC:3.1.2.14] | (RefSeq) oleoyl-acyl carrier protein thioesterase 1, chloroplastic	--	--	Acyl-ACP thioesterase	Oleoyl-acyl carrier protein thioesterase, chloroplastic (Fragment) OS=Coriandrum sativum OX=4047 GN=FATA PE=2 SV=1	I	Lipid transport and metabolism	PREDICTED: oleoyl-acyl carrier protein thioesterase, chloroplastic [Daucus carota subsp. sativus]
c44633.graph_c0	220	199	73	69	18	23	9.18	7.22	2.95	2.44	0.71	0.99	0.00672397	-1.92566	down	--	--	Molecular Function: aspartic-type endopeptidase activity (GO:0004190);; Biological Process: proteolysis (GO:0006508);;	--	[O]	Posttranslational modification, protein turnover, chaperones	Xylanase inhibitor N-terminal;; Xylanase inhibitor C-terminal;; Eukaryotic aspartyl protease	Aspartic proteinase PCS1 OS=Arabidopsis thaliana OX=3702 GN=PCS1 PE=2 SV=1	O	Posttranslational modification, protein turnover, chaperones	PREDICTED: aspartic proteinase PCS1-like [Daucus carota subsp. sativus]
c34543.graph_c0	79	28	69	209	428	104	3.98	1.23	3.37	8.93	20.25	5.43	0.0055239	2.06939	up	[HR]	Coenzyme transport and metabolism ;; General function prediction only	Molecular Function: hydrolase activity (GO:0016787);;	--	[I]	Lipid transport and metabolism	alpha/beta hydrolase fold;; Alpha/beta hydrolase family;; Serine aminopeptidase, S33;; Ndr family	--	S	Function unknown	PREDICTED: bifunctional epoxide hydrolase 2-like [Daucus carota subsp. sativus]
c47539.graph_c0	45	31	100	17	5	8	3.23	2.25	8.79	0.44	0.56	0.21	0.0090777	-2.21305	down	--	;;	Molecular Function: protein serine/threonine kinase activity (GO:0004674);; Molecular Function: ATP binding (GO:0005524);; Biological Process: protein phosphorylation (GO:0006468);;	--	[T]	Signal transduction mechanisms	Protein kinase domain;; Protein tyrosine kinase;; PPR repeat;; PPR repeat family;; PPR repeat;; Pentatricopeptide repeat domain;; PPR repeat;; PPR repeat family;; PPR repeat	Probable serine/threonine-protein kinase PBL26 OS=Arabidopsis thaliana OX=3702 GN=PBL26 PE=2 SV=1	S	Function unknown	PREDICTED: serine/threonine-protein kinase CDL1-like [Daucus carota subsp. sativus]
c34444.graph_c0	115	82	41	1	2	8	9.35	5.89	3.25	0.07	0.15	0.68	7.77669e-06	-3.58871	down	[L]	Replication, recombination and repair	--	--	--	--	SOUL heme-binding protein	--	S	Function unknown	PREDICTED: heme-binding-like protein At3g10130, chloroplastic [Daucus carota subsp. sativus]
c46830.graph_c0	62	155	108	32	14	21	4.25	9.52	7.59	1.78	0.94	1.58	0.00259702	-1.97954	down	--	--	Cellular Component: integral component of membrane (GO:0016021);;	K07052|5.08662e-38|sot:102597987|K07052 uncharacterized protein | (RefSeq) putative membrane peptidase YdiL	--	--	CAAX protease self-immunity	--	S	Function unknown	PREDICTED: uncharacterized protein LOC108220721 isoform X2 [Daucus carota subsp. sativus]
c51124.graph_c0	1538	2261	2302	8385	9936	8287	58.44	73.67	84.51	285.97	372.17	353.61	3.06193e-07	2.25167	up	--	--	Molecular Function: transcription factor activity, sequence-specific DNA binding (GO:0003700);; Cellular Component: nucleus (GO:0005634);; Biological Process: regulation of transcription, DNA-templated (GO:0006355);; Molecular Function: sequence-specific DNA binding (GO:0043565);;	K09060|7.43867e-46|sly:101249493|K09060 plant G-box-binding factor | (RefSeq) transcriptional activator TAF-1	--	--	G-box binding protein MFMR	Common plant regulatory factor 1 OS=Petroselinum crispum OX=4043 GN=CPRF1 PE=2 SV=1	K	Transcription	PREDICTED: common plant regulatory factor 1 [Daucus carota subsp. sativus]
c46266.graph_c0	438	636	342	203	76	124	13.66	17.17	10.33	5.37	2.22	3.98	0.00298994	-1.59902	down	[GI]	Carbohydrate transport and metabolism ;; Lipid transport and metabolism	Cellular Component: cell wall (GO:0005618);; Cellular Component: integral component of membrane (GO:0016021);; Molecular Function: pectinesterase activity (GO:0030599);; Biological Process: cell wall modification (GO:0042545);; Biological Process: negative regulation of catalytic activity (GO:0043086);; Molecular Function: aspartyl esterase activity (GO:0045330);; Biological Process: pectin catab…	--	--	--	Pectinesterase;; Plant invertase/pectin methylesterase inhibitor	Probable pectinesterase/pectinesterase inhibitor 51 OS=Arabidopsis thaliana OX=3702 GN=PME51 PE=2 SV=1	G	Carbohydrate transport and metabolism	PREDICTED: probable pectinesterase/pectinesterase inhibitor 51 [Daucus carota subsp. sativus]
c39632.graph_c0	33	2	8	0	0	0	4.03	0.22	0.96	0	0	0	0.00704235	-3.52103	down	[J]	Translation, ribosomal structure and biogenesis	Molecular Function: structural constituent of ribosome (GO:0003735);; Biological Process: translation (GO:0006412);; Molecular Function: rRNA binding (GO:0019843);; Cellular Component: cytosolic small ribosomal subunit (GO:0022627);;	K02987|2.49356e-130|ppp:PHYPADRAFT_227948|K02987 small subunit ribosomal protein S4e | (RefSeq) hypothetical protein	[J]	Translation, ribosomal structure and biogenesis	Ribosomal family S4e;; RS4NT (NUC023) domain;; S4 domain;; KOW motif	40S ribosomal protein S4 OS=Gossypium hirsutum OX=3635 GN=RPS4 PE=2 SV=1	J	Translation, ribosomal structure and biogenesis	hypothetical protein AXG93_2167s1280 [Marchantia polymorpha subsp. ruderalis]
c46180.graph_c0	53	143	38	2	0	2	2.22	5.21	1.54	0.07	0	0.15	2.89744e-08	-4.65522	down	--	--	--	--	[K]	Transcription	CCT motif;; B-box zinc finger	Zinc finger protein CONSTANS-LIKE 16 OS=Arabidopsis thaliana OX=3702 GN=COL16 PE=1 SV=2	K	Transcription	PREDICTED: zinc finger protein CONSTANS-LIKE 16 [Daucus carota subsp. sativus]
c39020.graph_c0	143	235	101	20	24	11	9.21	13.27	6.32	1.09	1.45	0.74	3.52843e-06	-2.72594	down	--	--	--	K02113|5.86623e-43|nnu:104604704|K02113 F-type H+-transporting ATPase subunit delta | (RefSeq) ATP synthase delta chain, chloroplastic	--	--	ATP synthase delta (OSCP) subunit	--	C	Energy production and conversion	ATP synthase delta chain, chloroplastic-like [Durio zibethinus]
c46250.graph_c0	43	70	11	2	0	6	1.94	2.73	0.48	0.08	0	0.28	0.00407823	-2.95864	down	--	--	--	--	[O]	Posttranslational modification, protein turnover, chaperones	Ring finger domain;; RING-like zinc finger;; RING-H2 zinc finger domain;; Zinc finger, C3HC4 type (RING finger);; Zinc finger, C3HC4 type (RING finger)	RING-H2 finger protein ATL16 OS=Arabidopsis thaliana OX=3702 GN=ATL16 PE=2 SV=1	O	Posttranslational modification, protein turnover, chaperones	PREDICTED: RING-H2 finger protein ATL16-like [Daucus carota subsp. sativus]
c35433.graph_c0	28	13	7	0	0	1	1.96	0.79	0.48	0	0	0.07	0.00685261	-3.33284	down	--	--	--	--	--	--	DnaJ domain	--	O	Posttranslational modification, protein turnover, chaperones	hypothetical protein DCAR_023308 [Daucus carota subsp. sativus]
c42515.graph_c0	943	1676	944	457	340	357	34.41	52.38	33.25	14.3	11.59	13.51	0.00478152	-1.38212	down	--	--	--	--	--	--	--	--	--	--	hypothetical protein DCAR_002790 [Daucus carota subsp. sativus]
c29285.graph_c0	272	312	154	100	47	44	39.53	40.99	22.09	12.2	6.41	6.8	0.00182446	-1.73531	down	--	--	--	--	--	--	NPR1 interacting	--	--	--	PREDICTED: uncharacterized protein LOC108192625 [Daucus carota subsp. sativus]
c47965.graph_c0	5526	5659	6611	38181	23364	54777	163.84	140.35	168.48	800.48	548.31	1343.4	8.3565e-09	2.78299	up	--	--	Cellular Component: vacuolar membrane (GO:0005774);; Cellular Component: plasma membrane (GO:0005886);; Cellular Component: plasmodesma (GO:0009506);; Cellular Component: chloroplast envelope (GO:0009941);; Cellular Component: integral component of membrane (GO:0016021);;	--	[R]	General function prediction only	Calcium-dependent channel, 7TM region, putative phosphate;; Cytosolic domain of 10TM putative phosphate transporter;; Late exocytosis, associated with Golgi transport	CSC1-like protein ERD4 OS=Arabidopsis thaliana OX=3702 GN=ERD4 PE=2 SV=1	S	Function unknown	PREDICTED: CSC1-like protein ERD4 [Daucus carota subsp. sativus]
c46589.graph_c0	2670	2006	2483	1086	429	275	117.55	69.97	109.78	41.31	18.37	13.34	0.000571497	-1.86108	down	--	--	Biological Process: transcription, DNA-templated (GO:0006351);;	K09284|0|vvi:100268051|K09284 AP2-like factor, euAP2 lineage | (RefSeq) AP2; transcription factor APETALA2	--	--	AP2 domain	Floral homeotic protein APETALA 2 OS=Arabidopsis thaliana OX=3702 GN=AP2 PE=1 SV=1	K	Transcription	PREDICTED: floral homeotic protein APETALA 2-like isoform X1 [Daucus carota subsp. sativus]
c46703.graph_c3	257	346	364	71	68	70	17.42	18.92	22.72	5.97	4.39	4.55	7.75232e-05	-1.93003	down	--	--	Biological Process: protein peptidyl-prolyl isomerization (GO:0000413);; Molecular Function: peptidyl-prolyl cis-trans isomerase activity (GO:0003755);; Biological Process: protein folding (GO:0006457);; Cellular Component: chloroplast thylakoid membrane (GO:0009535);; Cellular Component: thylakoid lumen (GO:0031977);;	--	[O]	Posttranslational modification, protein turnover, chaperones	FKBP-type peptidyl-prolyl cis-trans isomerase;; FKBP-type peptidyl-prolyl cis-trans isomerase	Peptidyl-prolyl cis-trans isomerase FKBP19, chloroplastic OS=Arabidopsis thaliana OX=3702 GN=FKBP19 PE=1 SV=1	O	Posttranslational modification, protein turnover, chaperones	FKBP-type peptidyl-prolyl cis-trans isomerase [Medicago truncatula]
c40968.graph_c0	41	4	7	0	0	0	3.05	0.39	0.73	0	0	0	0.00250464	-3.78575	down	[J]	Translation, ribosomal structure and biogenesis	Biological Process: cellular process (GO:0009987);; Cellular Component: small ribosomal subunit (GO:0015935);;	K02998|9.80078e-126|csv:101212340|K02998 small subunit ribosomal protein SAe | (RefSeq) 40S ribosomal protein SA-like	[J]	Translation, ribosomal structure and biogenesis	Ribosomal protein S2	40S ribosomal protein SA OS=Glycine max OX=3847 PE=2 SV=1	J	Translation, ribosomal structure and biogenesis	Ribosomal protein [Trema orientalis]
c37428.graph_c0	470	546	606	127	42	39	56.33	58.5	71.24	12.8	4.72	4.93	2.71276e-08	-2.76141	down	--	--	--	--	--	--	--	--	S	Function unknown	PREDICTED: uncharacterized protein LOC108208815 [Daucus carota subsp. sativus]
c39887.graph_c0	64	54	41	224	148	134	17.64	14.41	11.34	51.37	38.32	41.07	0.000816063	1.7414	up	[T]	Signal transduction mechanisms	Biological Process: activation of MAPKK activity (GO:0000186);; Molecular Function: MAP kinase kinase kinase activity (GO:0004709);; Molecular Function: ATP binding (GO:0005524);; Cellular Component: intracellular (GO:0005622);; Cellular Component: integral component of membrane (GO:0016021);;	K13414|2.86957e-73|cit:102609376|K13414 mitogen-activated protein kinase kinase kinase 1 [EC:2.7.11.25] | (RefSeq) mitogen-activated protein kinase kinase kinase 1	[T]	Signal transduction mechanisms	Protein kinase domain;; Protein tyrosine kinase	Mitogen-activated protein kinase kinase kinase 1 OS=Arabidopsis thaliana OX=3702 GN=MEKK1 PE=1 SV=2	T	Signal transduction mechanisms	PREDICTED: mitogen-activated protein kinase kinase kinase 1-like [Daucus carota subsp. sativus]
c40304.graph_c0	2540	5433	7062	298	372	539	185.79	345.9	498.98	20.04	25.47	41.9	4.59541e-09	-3.18722	down	--	--	Molecular Function: calcium ion binding (GO:0005509);; Cellular Component: photosystem II oxygen evolving complex (GO:0009654);; Biological Process: photosynthesis (GO:0015979);; Cellular Component: extrinsic component of membrane (GO:0019898);;	K08901|1.75225e-87|cic:CICLE_v10016525mg|K08901 photosystem II oxygen-evolving enhancer protein 3 | (RefSeq) hypothetical protein	--	--	Oxygen evolving enhancer protein 3 (PsbQ)	Oxygen-evolving enhancer protein 3, chloroplastic OS=Spinacia oleracea OX=3562 GN=PSBQ PE=1 SV=1	S	Function unknown	PREDICTED: oxygen-evolving enhancer protein 3-2, chloroplastic-like [Daucus carota subsp. sativus]
c38541.graph_c0	211	116	191	800	1040	2404	13.63	6.48	12.02	43.19	62.6	157.95	2.89096e-07	3.0692	up	--	--	Biological Process: protein polyubiquitination (GO:0000209);; Biological Process: protein ubiquitination involved in ubiquitin-dependent protein catabolic process (GO:0042787);; Biological Process: proteasome-mediated ubiquitin-dependent protein catabolic process (GO:0043161);; Molecular Function: metal ion binding (GO:0046872);; Molecular Function: ubiquitin protein ligase activity (GO:0061630);;	--	[O]	Posttranslational modification, protein turnover, chaperones	Ring finger domain;; Zinc finger, C3HC4 type (RING finger);; RING-H2 zinc finger domain;; Zinc finger, C3HC4 type (RING finger);; RING-like zinc finger;; Anaphase-promoting complex subunit 11 RING-H2 finger	E3 ubiquitin-protein ligase MPSR1 OS=Arabidopsis thaliana OX=3702 GN=MPSR1 PE=1 SV=1	O	Posttranslational modification, protein turnover, chaperones	PREDICTED: E3 ubiquitin-protein ligase CIP8-like [Daucus carota subsp. sativus]
c50225.graph_c0	605	1224	618	166	14	114	13.56	25.65	14.92	4.09	0.29	2.42	0.000133998	-2.67593	down	[K]	Transcription	Molecular Function: ATP binding (GO:0005524);; Biological Process: protein phosphorylation (GO:0006468);; Cellular Component: integral component of membrane (GO:0016021);; Molecular Function: 2-alkenal reductase [NAD(P)] activity (GO:0032440);; Molecular Function: tau-protein kinase activity (GO:0050321);; Biological Process: oxidation-reduction process (GO:0055114);;	--	--	--	Protein kinase domain;; Leucine rich repeat;; Protein tyrosine kinase;; Leucine Rich repeats (2 copies);; Leucine Rich Repeat;; Leucine rich repeat N-terminal domain;; Leucine Rich repeat	Probably inactive leucine-rich repeat receptor-like protein kinase At3g28040 OS=Arabidopsis thaliana OX=3702 GN=At3g28040 PE=2 SV=1	S	Function unknown	hypothetical protein DCAR_005497 [Daucus carota subsp. sativus]
c34498.graph_c0	121	137	68	14	17	19	14.17	14.35	7.93	1.42	1.87	2.35	0.000255167	-2.30079	down	--	--	--	--	--	--	--	--	--	--	hypothetical protein DCAR_027488 [Daucus carota subsp. sativus]
c40448.graph_c0	19	4	15	256	51	150	0.54	0.1	0.43	7.21	1.41	5.31	2.83049e-06	3.29107	up	--	--	--	--	--	--	Heavy-metal-associated domain	--	S	Function unknown	PREDICTED: heavy metal-associated isoprenylated plant protein 3-like [Daucus carota subsp. sativus]
c39510.graph_c0	2580	998	234	463	81	40	92.74	31.14	8.14	14.14	2.73	1.48	0.00776104	-2.40173	down	[Q]	Secondary metabolites biosynthesis, transport and catabolism	Biological Process: fatty acid biosynthetic process (GO:0006633);; Cellular Component: integral component of membrane (GO:0016021);; Molecular Function: transferase activity, transferring acyl groups other than amino-acyl groups (GO:0016747);;	K15397|0|sind:105177945|K15397 3-ketoacyl-CoA synthase [EC:2.3.1.199] | (RefSeq) 3-ketoacyl-CoA synthase 6	--	--	FAE1/Type III polyketide synthase-like protein;; 3-Oxoacyl-[acyl-carrier-protein (ACP)] synthase III C terminal;; Chalcone and stilbene synthases, C-terminal domain;; Chalcone and stilbene synthases, N-terminal domain;; FAE1/Type III polyketide synthase-like protein	3-ketoacyl-CoA synthase 6 OS=Arabidopsis thaliana OX=3702 GN=CUT1 PE=1 SV=1	I	Lipid transport and metabolism	3-ketoacyl-CoA synthase 6 [Herrania umbratica]
c41220.graph_c0	2921	4302	7847	77	64	185	168.84	218.19	440.43	3.8	3.48	11.15	2.01469e-17	-4.89605	down	--	--	Cellular Component: integral component of membrane (GO:0016021);;	K03542|1.7909e-85|gra:105770748|K03542 photosystem II 22kDa protein | (RefSeq) photosystem II 22 kDa protein, chloroplastic-like	--	--	Chlorophyll A-B binding protein	Photosystem II 22 kDa protein, chloroplastic OS=Solanum lycopersicum OX=4081 GN=PSBS PE=3 SV=1	I	Lipid transport and metabolism	PREDICTED: photosystem II 22 kDa protein, chloroplastic [Daucus carota subsp. sativus]
c52013.graph_c2	407	1012	227	96	55	89	7.84	17.45	4.48	1.55	0.98	1.91	9.69622e-05	-2.38454	down	[L]	Replication, recombination and repair	Molecular Function: transferase activity (GO:0016740);;	K00558|0|sind:105172733|K00558 DNA (cytosine-5)-methyltransferase 1 [EC:2.1.1.37] | (RefSeq) DNA (cytosine-5)-methyltransferase CMT2	--	--	BAH domain;; Chromo (CHRromatin Organisation MOdifier) domain;; C-5 cytosine-specific DNA methylase	DNA (cytosine-5)-methyltransferase CMT2 OS=Arabidopsis thaliana OX=3702 GN=CMT2 PE=2 SV=3	L	Replication, recombination and repair	PREDICTED: DNA (cytosine-5)-methyltransferase CMT2-like [Daucus carota subsp. sativus]
c46777.graph_c0	536	491	403	248	89	90	16.28	13.17	12.02	6.61	2.71	2.87	0.00302121	-1.5921	down	--	;;	Molecular Function: protein serine/threonine kinase activity (GO:0004674);; Molecular Function: ATP binding (GO:0005524);; Biological Process: protein phosphorylation (GO:0006468);; Cellular Component: integral component of membrane (GO:0016021);;	--	[T]	Signal transduction mechanisms	Protein kinase domain;; Protein tyrosine kinase	Probable receptor-like protein kinase At1g80640 OS=Arabidopsis thaliana OX=3702 GN=At1g80640 PE=2 SV=1	T	Signal transduction mechanisms	PREDICTED: probable receptor-like protein kinase At1g80640 isoform X1 [Daucus carota subsp. sativus]
c32853.graph_c1	291	1060	58	57	61	63	17.21	54.87	3.33	2.86	3.39	3.87	0.00481436	-2.36997	down	[G]	Carbohydrate transport and metabolism	Biological Process: carbohydrate metabolic process (GO:0005975);; Molecular Function: beta-glucosidase activity (GO:0008422);; Molecular Function: scopolin beta-glucosidase activity (GO:0102483);; Biological Process: glycosyl compound metabolic process (GO:1901657);;	K05350|0|nnu:104587780|K05350 beta-glucosidase [EC:3.2.1.21] | (RefSeq) beta-glucosidase 44-like	[G]	Carbohydrate transport and metabolism	Glycosyl hydrolase family 1	Beta-glucosidase 44 OS=Arabidopsis thaliana OX=3702 GN=BGLU44 PE=2 SV=1	G	Carbohydrate transport and metabolism	PREDICTED: beta-glucosidase 44-like isoform X1 [Daucus carota subsp. sativus]
c48596.graph_c0	172	217	171	473	503	361	5.62	6.3	5.6	12.21	15.75	11.92	0.00434484	1.40131	up	--	--	--	--	--	--	PDDEXK-like family of unknown function;; PDDEXK-like family of unknown function	--	S	Function unknown	PREDICTED: uncharacterized protein LOC108199913 [Daucus carota subsp. sativus]
c37214.graph_c0	0	0	1	3	12	89	0	0	0.06	0.16	0.7	5.78	7.76364e-05	4.37697	up	--	--	Cellular Component: membrane (GO:0016020);;	--	--	--	--	--	S	Function unknown	PREDICTED: uncharacterized protein LOC108213620 [Daucus carota subsp. sativus]
c17153.graph_c0	604	21	229	8	27	15	58.06	1.28	21.42	0.6	2.43	1.03	0.000237708	-3.2707	down	--	--	--	--	--	--	LURP-one-related	Protein LURP-one-related 15 OS=Arabidopsis thaliana OX=3702 GN=At5g01750 PE=1 SV=1	S	Function unknown	PREDICTED: protein LURP-one-related 15-like [Daucus carota subsp. sativus]
c51191.graph_c0	1404	2081	1816	471	506	516	50.5	64.23	62.87	14.21	17.34	18.67	0.00116303	-1.55112	down	[O]	Posttranslational modification, protein turnover, chaperones	Molecular Function: thioredoxin-disulfide reductase activity (GO:0004791);; Cellular Component: cytoplasm (GO:0005737);; Biological Process: removal of superoxide radicals (GO:0019430);; Biological Process: cell redox homeostasis (GO:0045454);; Biological Process: oxidation-reduction process (GO:0055114);;	K00384|0|sind:105159832|K00384 thioredoxin reductase (NADPH) [EC:1.8.1.9] | (RefSeq) thioredoxin reductase NTRC	[O]	Posttranslational modification, protein turnover, chaperones	Pyridine nucleotide-disulphide oxidoreductase;; Pyridine nucleotide-disulphide oxidoreductase;; Pyridine nucleotide-disulphide oxidoreductase;; Thioredoxin;; FAD dependent oxidoreductase;; Glutaredoxin;; FAD binding domain	NADPH-dependent thioredoxin reductase 3 OS=Arabidopsis thaliana OX=3702 GN=NTRC PE=1 SV=2	O	Posttranslational modification, protein turnover, chaperones	PREDICTED: thioredoxin reductase NTRC-like [Daucus carota subsp. sativus]
c35873.graph_c0	155	89	64	0	0	4	7.14	3.59	2.86	0	0	0.19	6.90867e-10	-4.98759	down	[K]	Transcription	Cellular Component: plasma membrane (GO:0005886);; Molecular Function: transferase activity (GO:0016740);;	--	[R]	General function prediction only	WD domain, G-beta repeat;; PQQ-like domain	Protein JINGUBANG OS=Arabidopsis thaliana OX=3702 GN=JGB PE=1 SV=1	S	Function unknown	hypothetical protein DCAR_024101 [Daucus carota subsp. sativus]
c43530.graph_c0	641	939	1262	86	133	194	44.81	57.67	85.63	5.11	8.76	14.19	4.39197e-05	-2.37084	down	--	--	--	--	--	--	--	Protein MAINTENANCE OF PSII UNDER HIGH LIGHT 1 OS=Arabidopsis thaliana OX=3702 GN=MPH1 PE=1 SV=1	S	Function unknown	PREDICTED: uncharacterized protein LOC108205786 [Daucus carota subsp. sativus]
c47011.graph_c0	882	869	973	3134	3902	4775	19.33	16.45	20.47	59.9	83.63	112.62	1.64864e-06	2.2552	up	--	--	--	K19366|3.32286e-13|jcu:105641769|K19366 spartin | (RefSeq) uncharacterized LOC105641769	--	--	Senescence-associated protein;; Senescence-associated protein	Senescence/dehydration-associated protein At3g51250 OS=Arabidopsis thaliana OX=3702 GN=At3g51250 PE=2 SV=1	S	Function unknown	hypothetical protein DCAR_010145 [Daucus carota subsp. sativus]
c47531.graph_c3	700	44	288	49	16	14	29.07	2.02	11.37	1.63	0.57	0.58	5.61608e-05	-3.23166	down	[G]	Carbohydrate transport and metabolism	Biological Process: flavonoid biosynthetic process (GO:0009813);; Cellular Component: intracellular membrane-bounded organelle (GO:0043231);; Biological Process: flavonoid glucuronidation (GO:0052696);; Molecular Function: quercetin 3-O-glucosyltransferase activity (GO:0080043);; Molecular Function: quercetin 7-O-glucosyltransferase activity (GO:0080044);;	--	[GC]	--	UDP-glucoronosyl and UDP-glucosyl transferase	Gallate 1-beta-glucosyltransferase OS=Quercus robur OX=38942 GN=UGT84A13 PE=1 SV=1	S	Function unknown	PREDICTED: putative UDP-glucose glucosyltransferase [Daucus carota subsp. sativus]
c45351.graph_c0	244	385	153	104	24	29	8.83	11.94	5.43	3.38	0.74	0.97	0.00118221	-2.0969	down	--	--	Molecular Function: DNA binding (GO:0003677);; Cellular Component: nucleus (GO:0005634);; Biological Process: transcription, DNA-templated (GO:0006351);; Biological Process: leaf formation (GO:0010338);;	K09422|9.22415e-170|tcc:TCM_021932|K09422 myb proto-oncogene protein, plant | (RefSeq) Myb-like HTH transcriptional regulator family protein isoform 1	[K]	Transcription	Myb-like DNA-binding domain;; Myb-like DNA-binding domain	Transcription factor AS1 OS=Arabidopsis thaliana OX=3702 GN=AS1 PE=1 SV=1	K	Transcription	PREDICTED: transcription factor AS1 [Daucus carota subsp. sativus]
c47207.graph_c0	131	140	206	639	1705	670	4.63	4.54	6.36	17.62	52.74	23.62	3.589e-06	2.71263	up	--	--	--	--	[S]	Function unknown	TLD	--	S	Function unknown	PREDICTED: uncharacterized protein LOC108215434 [Daucus carota subsp. sativus]
c46120.graph_c0	217	227	253	893	838	870	7.53	6.55	8.16	24.93	26.83	29.33	2.49039e-06	2.02374	up	--	--	Molecular Function: structural constituent of ribosome (GO:0003735);; Cellular Component: mitochondrial inner membrane (GO:0005743);; Biological Process: translation (GO:0006412);; Molecular Function: coenzyme A transmembrane transporter activity (GO:0015228);; Cellular Component: integral component of membrane (GO:0016021);; Biological Process: coenzyme A transmembrane transport (GO:0035349);;	--	[C]	Energy production and conversion	Mitochondrial carrier protein	Mitochondrial carrier protein CoAc1 OS=Arabidopsis thaliana OX=3702 GN=COAC1 PE=2 SV=1	S	Function unknown	PREDICTED: mitochondrial substrate carrier family protein P [Daucus carota subsp. sativus]
c45818.graph_c0	1747	2524	1980	8456	10919	17074	80.15	99.11	94.11	350.23	524.06	931	9.58677e-08	2.67591	up	--	--	--	--	--	--	--	--	S	Function unknown	PREDICTED: uncharacterized protein LOC108215866 [Daucus carota subsp. sativus]
c40049.graph_c0	79	4	11	0	0	0	10.35	0.47	1.42	0	0	0	0.000129702	-4.41315	down	--	--	Cellular Component: photosystem I reaction center (GO:0009538);; Biological Process: photosynthesis (GO:0015979);;	K02692|2.32499e-87|ppp:PHYPADRAFT_109427|K02692 photosystem I subunit II | (RefSeq) hypothetical protein	--	--	PsaD	Photosystem I reaction center subunit II, chloroplastic OS=Cucumis sativus OX=3659 GN=psaD PE=1 SV=1	C	Energy production and conversion	hypothetical protein AXG93_3017s1420 [Marchantia polymorpha subsp. ruderalis]
c45485.graph_c0	357	12	226	7	6	11	15.91	0.48	9.79	0.26	0.24	0.5	1.25346e-05	-3.7614	down	[C]	Energy production and conversion	--	--	[O]	Posttranslational modification, protein turnover, chaperones	DnaJ domain;; 4Fe-4S single cluster domain of Ferredoxin I;; 4Fe-4S single cluster domain	Chaperone protein dnaJ C76, chloroplastic OS=Arabidopsis thaliana OX=3702 GN=DJC76 PE=2 SV=1	C	Energy production and conversion	PREDICTED: uncharacterized protein LOC108196766 [Daucus carota subsp. sativus]
c50339.graph_c0	1412	847	1555	4956	2578	4093	41.39	20.74	44.64	118.26	68.99	112.39	0.00136311	1.67215	up	--	--	Molecular Function: aspartic-type endopeptidase activity (GO:0004190);; Biological Process: proteolysis (GO:0006508);; Cellular Component: membrane (GO:0016020);;	--	[O]	Posttranslational modification, protein turnover, chaperones	Xylanase inhibitor N-terminal;; Eukaryotic aspartyl protease;; Xylanase inhibitor C-terminal;; Eukaryotic aspartyl protease	Aspartyl protease family protein 1 OS=Arabidopsis thaliana OX=3702 GN=APF1 PE=1 SV=1	O	Posttranslational modification, protein turnover, chaperones	PREDICTED: aspartyl protease family protein 1 [Daucus carota subsp. sativus]
c51129.graph_c0	467	535	446	1574	979	794	17.27	17.24	16.43	46.32	33.17	29.75	0.00391068	1.3042	up	--	--	Molecular Function: calcium-dependent phospholipid binding (GO:0005544);; Cellular Component: integral component of membrane (GO:0016021);; Biological Process: negative regulation of cell death (GO:0060548);;	--	[T]	Signal transduction mechanisms	Copine;; C2 domain	Protein BONZAI 3 OS=Arabidopsis thaliana OX=3702 GN=BON3 PE=1 SV=1	S	Function unknown	PREDICTED: protein BONZAI 3 [Daucus carota subsp. sativus]
c45996.graph_c0	7593	6831	8457	15513	18839	27609	386.83	304.35	411.64	674.13	922.96	1482.52	0.00375547	1.60249	up	--	--	Cellular Component: vacuole (GO:0005773);; Cellular Component: lipid droplet (GO:0005811);; Biological Process: lipid storage (GO:0019915);;	--	--	--	Rubber elongation factor protein (REF)	Stress-related protein OS=Vitis riparia OX=96939 GN=SRP PE=2 SV=1	S	Function unknown	PREDICTED: REF/SRPP-like protein At3g05500 [Daucus carota subsp. sativus]
c43138.graph_c0	410	2170	632	121	76	207	22.66	104.84	33.91	5.67	3.94	11.87	0.000408132	-2.47555	down	[GI]	Carbohydrate transport and metabolism ;; Lipid transport and metabolism	Cellular Component: cell wall (GO:0005618);; Molecular Function: lyase activity (GO:0016829);; Molecular Function: pectinesterase activity (GO:0030599);; Biological Process: cell wall modification (GO:0042545);; Molecular Function: aspartyl esterase activity (GO:0045330);; Biological Process: pectin catabolic process (GO:0045490);;	K01051|0|tcc:TCM_000251|K01051 pectinesterase [EC:3.1.1.11] | (RefSeq) Pectin lyase-like superfamily protein isoform 1	--	--	Pectinesterase	Probable pectinesterase 53 OS=Arabidopsis thaliana OX=3702 GN=PME53 PE=2 SV=1	G	Carbohydrate transport and metabolism	PREDICTED: probable pectinesterase 53 [Daucus carota subsp. sativus]
c52012.graph_c0	2232	3200	2437	10041	3720	6835	25.94	30.8	26.28	110.26	40.87	96.59	0.00377212	1.46828	up	--	--	Molecular Function: metal ion binding (GO:0046872);;	--	[K]	Transcription	GYF domain;; Plus-3 domain;; SWIB/MDM2 domain	Zinc finger CCCH domain-containing protein 44 OS=Arabidopsis thaliana OX=3702 GN=At3g51120 PE=2 SV=3	S	Function unknown	PREDICTED: zinc finger CCCH domain-containing protein 44-like [Daucus carota subsp. sativus]
c49031.graph_c0	277	455	438	156	74	95	6.83	9.71	10.55	3.24	1.75	2.41	0.00135614	-1.64223	down	[J]	Translation, ribosomal structure and biogenesis	Cellular Component: mitochondrion (GO:0005739);; Cellular Component: chloroplast stroma (GO:0009570);; Cellular Component: glutamyl-tRNA(Gln) amidotransferase complex (GO:0030956);; Biological Process: mitochondrial translation (GO:0032543);; Molecular Function: glutaminyl-tRNA synthase (glutamine-hydrolyzing) activity (GO:0050567);; Biological Process: glutaminyl-tRNAGln biosynthesis via transam…	K02434|0|gra:105800656|K02434 aspartyl-tRNA(Asn)/glutamyl-tRNA(Gln) amidotransferase subunit B [EC:6.3.5.6 6.3.5.7] | (RefSeq) glutamyl-tRNA(Gln) amidotransferase subunit B, chloroplastic/mitochondrial	[J]	Translation, ribosomal structure and biogenesis	GatB/GatE catalytic domain;; GatB domain;; GatB domain	Glutamyl-tRNA(Gln) amidotransferase subunit B, chloroplastic/mitochondrial OS=Ricinus communis OX=3988 GN=GATB PE=3 SV=1	J	Translation, ribosomal structure and biogenesis	PREDICTED: glutamyl-tRNA(Gln) amidotransferase subunit B, chloroplastic/mitochondrial [Daucus carota subsp. sativus]
c49834.graph_c0	1763	1895	1570	5409	3141	6368	245.94	280.27	193.6	351.36	225.44	383.88	0.000976802	1.6459	up	[O]	Posttranslational modification, protein turnover, chaperones	Molecular Function: ATP binding (GO:0005524);;	K03283|0|cam:101501931|K03283 heat shock 70kDa protein 1/8 | (RefSeq) heat shock cognate 70 kDa protein 2	[O]	Posttranslational modification, protein turnover, chaperones	Hsp70 protein;; MreB/Mbl protein	Heat shock cognate 70 kDa protein OS=Petunia hybrida OX=4102 GN=HSP70 PE=2 SV=1	O	Posttranslational modification, protein turnover, chaperones	PREDICTED: heat shock cognate 70 kDa protein 2-like [Daucus carota subsp. sativus]
c41560.graph_c0	363	390	7	2	0	0	17.72	17.37	0.26	0.06	0	0	0.00679748	-3.60063	down	[Q]	Secondary metabolites biosynthesis, transport and catabolism	Molecular Function: iron ion binding (GO:0005506);; Cellular Component: cytoplasm (GO:0005737);; Molecular Function: L-ascorbic acid binding (GO:0031418);; Molecular Function: flavonol synthase activity (GO:0045431);; Molecular Function: naringenin 3-dioxygenase activity (GO:0045486);; Biological Process: flavonol biosynthetic process (GO:0051555);; Biological Process: oxidation-reduction process…	K05278|5.48177e-72|sot:102577717|K05278 flavonol synthase [EC:1.14.11.23] | (RefSeq) FLS; flavonol synthase	[QR]	--	non-haem dioxygenase in morphine synthesis N-terminal;; 2OG-Fe(II) oxygenase superfamily;; 2OG-Fe(II) oxygenase superfamily	Flavonol synthase/flavanone 3-hydroxylase OS=Petroselinum crispum OX=4043 GN=FLS PE=1 SV=1	S	Function unknown	PREDICTED: flavonol synthase/flavanone 3-hydroxylase [Daucus carota subsp. sativus]
c38851.graph_c0	2569	2991	2534	435	333	605	97.12	95.8	92.07	14.19	16.28	29.15	1.49431e-06	-2.24153	down	[Q]	Secondary metabolites biosynthesis, transport and catabolism	Molecular Function: cellulase activity (GO:0008810);; Biological Process: cellulose catabolic process (GO:0030245);;	--	--	--	Glycosyl hydrolase family 9;; Glycosyl hydrolase family 9	Endoglucanase 11 OS=Arabidopsis thaliana OX=3702 GN=At2g32990 PE=2 SV=1	G	Carbohydrate transport and metabolism	PREDICTED: endoglucanase 11-like [Daucus carota subsp. sativus]
c42344.graph_c1	85	265	100	31	29	15	5.33	15.49	6.06	1.81	1.88	1.08	0.000861117	-2.21245	down	--	--	--	--	--	--	--	--	S	Function unknown	PREDICTED: uncharacterized protein LOC108213326 [Daucus carota subsp. sativus]
c36700.graph_c1	286	524	56	56	21	54	7.9	12.92	1.49	1.31	0.54	1.54	0.00399054	-2.26243	down	[NW]	Cell motility ;; Extracellular structures	Molecular Function: protein tyrosine kinase activity (GO:0004713);; Biological Process: protein phosphorylation (GO:0006468);;	--	[T]	Signal transduction mechanisms	Protein tyrosine kinase;; Protein kinase domain	Proline-rich receptor-like protein kinase PERK8 OS=Arabidopsis thaliana OX=3702 GN=PERK8 PE=1 SV=1	T	Signal transduction mechanisms	PREDICTED: inactive protein kinase SELMODRAFT_444075-like [Daucus carota subsp. sativus]
c51228.graph_c2	2	3	2	39	24	8	0.58	0.82	0.59	9.29	6.5	2.54	0.00601368	2.80438	up	--	--	Molecular Function: protein kinase activity (GO:0004672);; Molecular Function: ATP binding (GO:0005524);; Biological Process: protein phosphorylation (GO:0006468);;	K14500|4.06468e-56|vvi:100256502|K14500 BR-signaling kinase [EC:2.7.11.1] | (RefSeq) probable serine/threonine-protein kinase At5g41260	--	--	--	Serine/threonine-protein kinase BSK7 OS=Arabidopsis thaliana OX=3702 GN=BSK7 PE=3 SV=1	T	Signal transduction mechanisms	PREDICTED: probable serine/threonine-protein kinase At5g41260 [Daucus carota subsp. sativus]
c34517.graph_c0	7779	22619	1699	1273	297	1841	880.08	2278.54	188.5	120.56	31.49	219.12	0.00175376	-2.61497	down	--	--	--	--	--	--	Hydrophobic seed protein;; Protease inhibitor/seed storage/LTP family	36.4 kDa proline-rich protein OS=Solanum lycopersicum OX=4081 GN=TPRP-F1 PE=2 SV=1	S	Function unknown	hypothetical protein CRG98_027036 [Punica granatum]
c40522.graph_c0	42	2	18	0	0	0	4.69	0.2	1.97	0	0	0	0.00103222	-3.99126	down	[E]	Amino acid transport and metabolism	Biological Process: alpha-amino acid metabolic process (GO:1901605);;	--	--	--	Aluminium induced protein;; Glutamine amidotransferase domain;; Aluminium induced protein	Stem-specific protein TSJT1 OS=Nicotiana tabacum OX=4097 GN=TSJT1 PE=2 SV=1	S	Function unknown	hypothetical protein SELMODRAFT_175276 [Selaginella moellendorffii]
c41991.graph_c1	400	287	333	1036	2015	1117	19.64	12.48	15.06	46.46	89.21	54.93	5.80154e-05	2.14915	up	--	--	--	--	--	--	Dof domain, zinc finger	Dof zinc finger protein DOF5.6 OS=Arabidopsis thaliana OX=3702 GN=DOF5.6 PE=2 SV=2	S	Function unknown	PREDICTED: dof zinc finger protein DOF5.6 [Daucus carota subsp. sativus]
c50977.graph_c0	3227	6676	4086	1917	1418	1213	85.35	149.31	100.61	40.85	32.71	32.08	0.00470832	-1.39141	down	[H]	Coenzyme transport and metabolism	Biological Process: protoporphyrinogen IX biosynthetic process (GO:0006782);; Molecular Function: glutamyl-tRNA reductase activity (GO:0008883);; Cellular Component: chloroplast (GO:0009507);; Biological Process: chlorophyll biosynthetic process (GO:0015995);; Molecular Function: NADP binding (GO:0050661);; Biological Process: oxidation-reduction process (GO:0055114);;	K02492|0|spen:107017635|K02492 glutamyl-tRNA reductase [EC:1.2.1.70] | (RefSeq) glutamyl-tRNA reductase 1, chloroplastic	--	--	Shikimate / quinate 5-dehydrogenase;; Glutamyl-tRNAGlu reductase, N-terminal domain;; Glutamyl-tRNAGlu reductase, dimerisation domain;; NADP oxidoreductase coenzyme F420-dependent	Glutamyl-tRNA reductase 1, chloroplastic OS=Cucumis sativus OX=3659 GN=HEMA1 PE=2 SV=1	H	Coenzyme transport and metabolism	PREDICTED: glutamyl-tRNA reductase 1, chloroplastic [Daucus carota subsp. sativus]
c37488.graph_c1	248	41	351	42	42	31	13.88	1.99	19.05	1.57	1.91	1.58	0.00966173	-2.11011	down	--	--	--	--	--	--	--	GPI-anchored protein LLG1 OS=Arabidopsis thaliana OX=3702 GN=LLG1 PE=1 SV=1	S	Function unknown	PREDICTED: GPI-anchored protein LORELEI-like [Daucus carota subsp. sativus]
c49258.graph_c1	26	25	24	156	105	69	1.85	2.42	2.54	11.07	6.87	5.39	0.000138367	2.14231	up	--	--	--	--	--	--	--	--	--	--	hypothetical protein DCAR_006143 [Daucus carota subsp. sativus]
c35754.graph_c0	218	421	539	62	60	68	11.87	20	28.41	2.85	3.06	3.83	2.61539e-05	-2.30108	down	[O]	Posttranslational modification, protein turnover, chaperones	Biological Process: protein peptidyl-prolyl isomerization (GO:0000413);; Molecular Function: peptidyl-prolyl cis-trans isomerase activity (GO:0003755);; Molecular Function: FK506 binding (GO:0005528);; Cellular Component: endoplasmic reticulum membrane (GO:0005789);; Biological Process: chaperone-mediated protein folding (GO:0061077);;	--	[O]	Posttranslational modification, protein turnover, chaperones	FKBP-type peptidyl-prolyl cis-trans isomerase	Peptidyl-prolyl cis-trans isomerase FKBP17-2, chloroplastic OS=Arabidopsis thaliana OX=3702 GN=FKBP17-2 PE=1 SV=1	O	Posttranslational modification, protein turnover, chaperones	PREDICTED: peptidyl-prolyl cis-trans isomerase FKBP17-2, chloroplastic [Daucus carota subsp. sativus]
c48523.graph_c0	3729	3647	3287	8388	8822	5798	117	99.41	98.94	227.6	257.87	187.96	0.00848715	1.25355	up	--	--	--	--	--	--	--	--	--	--	PREDICTED: corepressor interacting with RBPJ 1 [Daucus carota subsp. sativus]
c35905.graph_c0	3366	3852	30	9	40	5	156.73	156.21	1.35	0.36	1.79	0.24	0.00462339	-3.66035	down	[I]	Lipid transport and metabolism	Cellular Component: membrane (GO:0016020);; Molecular Function: oxidoreductase activity (GO:0016491);; Biological Process: single-organism metabolic process (GO:0044710);;	K10256|6.34223e-150|egr:104445836|K10256 omega-6 fatty acid desaturase / acyl-lipid omega-6 desaturase (Delta-12 desaturase) [EC:1.14.19.6 1.14.19.22] | (RefSeq) delta(12)-fatty-acid desaturase FAD2	--	--	Fatty acid desaturase	Delta(12)-fatty-acid desaturase FAD2 OS=Vernicia fordii OX=73154 GN=FAD2 PE=1 SV=1	I	Lipid transport and metabolism	PREDICTED: delta(12) fatty acid desaturase FAD2-like [Daucus carota subsp. sativus]
c44905.graph_c1	156	15	48	6	1	0	8.35	0.71	2.49	0.27	0.05	0	2.48467e-05	-3.98076	down	[QV]	Secondary metabolites biosynthesis, transport and catabolism ;; Defense mechanisms	Molecular Function: iron ion binding (GO:0005506);; Cellular Component: integral component of membrane (GO:0016021);; Molecular Function: oxidoreductase activity, acting on paired donors, with incorporation or reduction of molecular oxygen, NAD(P)H as one donor, and incorporation of one atom of oxygen (GO:0016709);; Molecular Function: heme binding (GO:0020037);; Biological Process: secondary met…	--	[Q]	Secondary metabolites biosynthesis, transport and catabolism	Cytochrome P450	Cytochrome P450 78A5 OS=Arabidopsis thaliana OX=3702 GN=CYP78A5 PE=2 SV=1	Q	Secondary metabolites biosynthesis, transport and catabolism	PREDICTED: cytochrome P450 78A5-like [Daucus carota subsp. sativus]
c33610.graph_c0	169	236	527	68	48	43	6.11	7.4	18.43	2.09	1.63	1.6	0.000188344	-2.26778	down	[QV]	Secondary metabolites biosynthesis, transport and catabolism ;; Defense mechanisms	Cellular Component: membrane (GO:0016020);; Molecular Function: oxidoreductase activity, acting on paired donors, with incorporation or reduction of molecular oxygen, NAD(P)H as one donor, and incorporation of one atom of oxygen (GO:0016709);; Biological Process: secondary metabolite biosynthetic process (GO:0044550);; Molecular Function: metal ion binding (GO:0046872);;	--	[Q]	Secondary metabolites biosynthesis, transport and catabolism	Cytochrome P450	Cytochrome P450 71A2 OS=Solanum melongena OX=4111 GN=CYP71A2 PE=2 SV=1	Q	Secondary metabolites biosynthesis, transport and catabolism	PREDICTED: cytochrome P450 71A21-like [Daucus carota subsp. sativus]
c44666.graph_c5	97	39	193	200	550	921	4.16	1.74	11.53	19.22	75.49	132.15	0.00348642	2.34458	up	--	--	Cellular Component: mitochondrion (GO:0005739);; Cellular Component: ribosome (GO:0005840);;	--	--	--	Late embryogenesis abundant protein 18	Uncharacterized mitochondrial protein AtMg01010 OS=Arabidopsis thaliana OX=3702 GN=AtMg01010 PE=4 SV=1	S	Function unknown	ribosomal protein L10 (mitochondrion) [Daucus carota subsp. sativus]
c47474.graph_c1	1501	1481	1590	720	367	300	63.23	54.33	67.35	29.6	17.32	15.03	0.000676622	-1.56424	down	--	--	--	--	--	--	--	Zinc finger protein 4 OS=Arabidopsis thaliana OX=3702 GN=ZFP4 PE=2 SV=2	S	Function unknown	PREDICTED: zinc finger protein 4-like [Daucus carota subsp. sativus]
c52063.graph_c0	1238	1416	1805	3769	2430	5640	18.25	18.31	25.74	46.5	32.47	81.87	0.00850784	1.54206	up	[P]	Inorganic ion transport and metabolism	Molecular Function: magnesium ion binding (GO:0000287);; Molecular Function: phospholipid-translocating ATPase activity (GO:0004012);; Molecular Function: ATP binding (GO:0005524);; Cellular Component: plasma membrane (GO:0005886);; Cellular Component: integral component of membrane (GO:0016021);; Biological Process: phospholipid translocation (GO:0045332);;	K14802|0|gra:105776323|K14802 phospholipid-transporting ATPase [EC:3.6.3.1] | (RefSeq) phospholipid-transporting ATPase 1-like	[R]	General function prediction only	Phospholipid-translocating P-type ATPase C-terminal;; Phospholipid-translocating ATPase N-terminal;; haloacid dehalogenase-like hydrolase;; Cation transport ATPase (P-type);; E1-E2 ATPase	Phospholipid-transporting ATPase 1 OS=Arabidopsis thaliana OX=3702 GN=ALA1 PE=2 SV=1	U	Intracellular trafficking, secretion, and vesicular transport	PREDICTED: phospholipid-transporting ATPase 1 [Daucus carota subsp. sativus]
c38734.graph_c0	563	1172	192	52	13	65	46.24	84.95	15.38	3.61	1	5.58	1.63292e-06	-3.30924	down	[G]	Carbohydrate transport and metabolism	Molecular Function: pectate lyase activity (GO:0030570);; Biological Process: pectin catabolic process (GO:0045490);; Molecular Function: metal ion binding (GO:0046872);;	K01728|2.40759e-169|vvi:100242302|K01728 pectate lyase [EC:4.2.2.2] | (RefSeq) probable pectate lyase 5	--	--	Pectate lyase	Probable pectate lyase 5 OS=Arabidopsis thaliana OX=3702 GN=At1g67750 PE=2 SV=2	G	Carbohydrate transport and metabolism	PREDICTED: probable pectate lyase 5 [Daucus carota subsp. sativus]
c35216.graph_c0	9	12	8	71	32	48	3.04	3.89	2.77	19.69	10.13	18	0.0012771	2.31138	up	--	--	--	K10999|1.94621e-09|spen:107007131|K10999 cellulose synthase A [EC:2.4.1.12] | (RefSeq) cellulose synthase A catalytic subunit 2 [UDP-forming]-like	--	--	--	Cellulose synthase A catalytic subunit 5 [UDP-forming] OS=Arabidopsis thaliana OX=3702 GN=CESA5 PE=1 SV=2	M	Cell wall/membrane/envelope biogenesis	unnamed protein product [Coffea canephora]
c44800.graph_c0	172	185	441	686	871	1499	6.92	6.5	17.39	24.35	48.05	66.91	0.00241302	2.02203	up	--	--	Molecular Function: hydrolase activity, hydrolyzing O-glycosyl compounds (GO:0004553);; Biological Process: carbohydrate metabolic process (GO:0005975);; Molecular Function: polysaccharide binding (GO:0030247);; Cellular Component: anchored component of plasma membrane (GO:0046658);;	--	--	--	Glycosyl hydrolases family 17;; X8 domain	Glucan endo-1,3-beta-glucosidase 8 OS=Arabidopsis thaliana OX=3702 GN=At1g64760 PE=1 SV=2	S	Function unknown	PREDICTED: glucan endo-1,3-beta-glucosidase 8 [Daucus carota subsp. sativus]
c41653.graph_c1	15	62	14	1	0	0	2.79	10.58	2.59	0.16	0	0	0.000104025	-4.18821	down	[T]	Signal transduction mechanisms	Molecular Function: protein kinase activity (GO:0004672);; Molecular Function: ATP binding (GO:0005524);; Biological Process: protein phosphorylation (GO:0006468);;	--	[R]	General function prediction only	Protein kinase domain;; Protein tyrosine kinase	Protein kinase PINOID OS=Arabidopsis thaliana OX=3702 GN=PID PE=1 SV=1	T	Signal transduction mechanisms	hypothetical protein DCAR_027873 [Daucus carota subsp. sativus]
c38460.graph_c0	76	179	54	9	15	5	5.37	9.84	4.93	0.44	1.35	0.5	6.47344e-05	-2.8707	down	[IQR]	Lipid transport and metabolism ;; Secondary metabolites biosynthesis, transport and catabolism ;; General function prediction only	--	K08081|5.93362e-144|vvi:100251860|K08081 tropinone reductase I [EC:1.1.1.206] | (RefSeq) tropinone reductase homolog At5g06060	[R]	General function prediction only	Enoyl-(Acyl carrier protein) reductase;; short chain dehydrogenase	Tropinone reductase homolog At2g29260, chloroplastic OS=Arabidopsis thaliana OX=3702 GN=At2g29260 PE=2 SV=1	S	Function unknown	PREDICTED: tropinone reductase homolog At5g06060-like [Daucus carota subsp. sativus]
c47974.graph_c0	909	1057	758	60	19	78	22.96	17.74	21.93	1.05	0.73	1.68	4.37428e-12	-3.6843	down	[L]	Replication, recombination and repair	Molecular Function: DNA binding (GO:0003677);; Molecular Function: ATP binding (GO:0005524);; Cellular Component: chloroplast stroma (GO:0009570);; Cellular Component: chloroplast envelope (GO:0009941);; Molecular Function: hydrolase activity (GO:0016787);;	--	[L]	Replication, recombination and repair	AAA domain;; AAA domain;; AAA domain;; AAA domain;; Viral (Superfamily 1) RNA helicase;; Helicase	Regulator of nonsense transcripts 1 homolog OS=Arabidopsis thaliana OX=3702 GN=UPF1 PE=1 SV=2	L	Replication, recombination and repair	PREDICTED: DNA-binding protein SMUBP-2 [Daucus carota subsp. sativus]
c33378.graph_c0	7	3	33	159	284	890	0.64	0.24	2.82	12.14	23.95	84.63	1.31107e-08	4.48799	up	--	--	--	--	--	--	Late embryogenesis abundant (LEA) group 1	--	--	--	PREDICTED: protein LE25-like [Daucus carota subsp. sativus]
c33951.graph_c0	180	71	257	1	14	6	10.9	3.76	15.12	0.07	0.8	0.38	8.15964e-07	-3.79198	down	[I]	Lipid transport and metabolism	Molecular Function: phosphogluconate dehydrogenase (decarboxylating) activity (GO:0004616);; Molecular Function: 3-hydroxyisobutyrate dehydrogenase activity (GO:0008442);; Molecular Function: NAD binding (GO:0051287);; Biological Process: oxidation-reduction process (GO:0055114);;	K18121|1.81422e-178|sind:105163806|K18121 glyoxylate/succinic semialdehyde reductase [EC:1.1.1.79 1.1.1.-] | (RefSeq) glyoxylate/succinic semialdehyde reductase 1	[R]	General function prediction only	NAD binding domain of 6-phosphogluconate dehydrogenase;; NAD-binding of NADP-dependent 3-hydroxyisobutyrate dehydrogenase;; Ketopantoate reductase PanE/ApbA;; NADP oxidoreductase coenzyme F420-dependent	Glyoxylate/succinic semialdehyde reductase 1 OS=Arabidopsis thaliana OX=3702 GN=GLYR1 PE=1 SV=1	I	Lipid transport and metabolism	PREDICTED: glyoxylate/succinic semialdehyde reductase 1 [Daucus carota subsp. sativus]
c40551.graph_c1	308	376	296	155	43	67	22.38	24.09	21.04	9.58	3	5.07	0.00225568	-1.71329	down	--	--	--	--	[K]	Transcription	Myb/SANT-like DNA-binding domain;; Alcohol dehydrogenase transcription factor Myb/SANT-like	Trihelix transcription factor GT-2 OS=Arabidopsis thaliana OX=3702 GN=GT-2 PE=2 SV=1	K	Transcription	PREDICTED: trihelix transcription factor GT-2-like isoform X1 [Daucus carota subsp. sativus]
c43072.graph_c0	34	4	18	1	0	0	2.78	0.29	1.44	0.07	0	0	0.00328725	-3.55749	down	[QV]	Secondary metabolites biosynthesis, transport and catabolism ;; Defense mechanisms	Molecular Function: monooxygenase activity (GO:0004497);; Molecular Function: iron ion binding (GO:0005506);; Cellular Component: integral component of membrane (GO:0016021);; Molecular Function: oxidoreductase activity, acting on paired donors, with incorporation or reduction of molecular oxygen (GO:0016705);; Molecular Function: heme binding (GO:0020037);; Biological Process: oxidation-reductio…	--	[Q]	Secondary metabolites biosynthesis, transport and catabolism	Cytochrome P450	Cytochrome P450 89A2 OS=Arabidopsis thaliana OX=3702 GN=CYP89A2 PE=2 SV=2	Q	Secondary metabolites biosynthesis, transport and catabolism	PREDICTED: cytochrome P450 89A2-like [Daucus carota subsp. sativus]
c38950.graph_c0	322	157	145	39	42	47	30.45	13.16	13.45	3.19	3.81	4.66	0.00154538	-1.95187	down	--	--	--	--	--	--	--	--	--	--	PREDICTED: protein AUXIN-REGULATED GENE INVOLVED IN ORGAN SIZE-like [Daucus carota subsp. sativus]
c41171.graph_c0	623	1088	635	243	112	140	35.78	54.74	35.42	11.91	6.04	8.34	1.43102e-05	-2.01785	down	[H]	Coenzyme transport and metabolism	Biological Process: metabolic process (GO:0008152);; Molecular Function: hydrolase activity (GO:0016787);;	--	[R]	General function prediction only	Haloacid dehalogenase-like hydrolase;; haloacid dehalogenase-like hydrolase;; HAD-hyrolase-like	--	S	Function unknown	PREDICTED: haloacid dehalogenase-like hydrolase domain-containing protein 3 [Daucus carota subsp. sativus]
c22581.graph_c0	0	4	0	6	9	74	0	0.19	0	0.28	0.46	4.19	0.00284617	3.4538	up	--	--	--	--	[R]	General function prediction only	zinc-binding in reverse transcriptase	Uncharacterized mitochondrial protein AtMg00310 OS=Arabidopsis thaliana OX=3702 GN=AtMg00310 PE=4 SV=1	S	Function unknown	PREDICTED: uncharacterized protein LOC108194810 [Daucus carota subsp. sativus]
c38066.graph_c0	681	640	1072	1590	3639	2239	77.85	65.26	120.13	152.8	389.86	269.64	0.00390889	1.77537	up	[I]	Lipid transport and metabolism	Molecular Function: hydrolase activity (GO:0016787);;	--	[R]	General function prediction only	alpha/beta hydrolase fold;; BAAT / Acyl-CoA thioester hydrolase C terminal	--	S	Function unknown	PREDICTED: uncharacterized protein LOC108205152 [Daucus carota subsp. sativus]
c48443.graph_c0	1017	614	988	3147	1576	2564	24.56	12.44	22.99	62.09	34.58	62.08	0.00318553	1.54895	up	--	--	Cellular Component: plasma membrane (GO:0005886);;	--	--	--	Weak chloroplast movement under blue light	WEB family protein At5g55860 OS=Arabidopsis thaliana OX=3702 GN=At5g55860 PE=1 SV=1	S	Function unknown	PREDICTED: WEB family protein At5g55860 [Daucus carota subsp. sativus]
c37573.graph_c0	44	53	26	6	3	6	3.32	3.46	1.96	0.4	0.22	0.49	0.00258772	-2.51376	down	--	--	--	--	--	--	--	--	S	Function unknown	PREDICTED: uncharacterized protein LOC108220880 [Daucus carota subsp. sativus]
c51203.graph_c0	316	1226	78	122	40	63	7.33	24.07	1.78	2.49	0.86	1.45	0.00420694	-2.37659	down	--	--	--	--	--	--	Zein-binding	Myosin-binding protein 3 OS=Arabidopsis thaliana OX=3702 GN=MYOB3 PE=1 SV=1	S	Function unknown	myosin-binding protein 3 [Sesamum indicum]
c46244.graph_c0	6230	3152	8726	23290	24642	29125	238.76	99.91	348.07	991.56	1180.76	1617.06	0.000120546	2.15465	up	--	--	--	--	--	--	Domain of unknown function (DUF569);; Fascin domain	--	S	Function unknown	PREDICTED: uncharacterized protein LOC108202603 [Daucus carota subsp. sativus]
c42398.graph_c0	197	180	204	919	982	765	14.98	11.94	14.98	56.05	68.68	62.03	6.0036e-08	2.30474	up	--	--	--	--	--	--	Domain of unknown function (DUF5030)	--	--	--	--
c41791.graph_c0	50	90	90	239	346	178	3.58	5.67	6.28	14.49	23.28	13.3	0.00167078	1.8354	up	[J]	Translation, ribosomal structure and biogenesis	Molecular Function: translation elongation factor activity (GO:0003746);; Molecular Function: GTPase activity (GO:0003924);; Molecular Function: GTP binding (GO:0005525);; Cellular Component: cytoplasm (GO:0005737);; Biological Process: translational elongation (GO:0006414);;	K03231|5.62134e-107|crb:CARUB_v100096370m|K03231 elongation factor 1-alpha | (RefSeq) hypothetical protein	[J]	Translation, ribosomal structure and biogenesis	Elongation factor Tu C-terminal domain	Elongation factor 1-alpha OS=Daucus carota OX=4039 PE=1 SV=1	J	Translation, ribosomal structure and biogenesis	AT1G07940, partial [Arabidopsis thaliana]
c51724.graph_c0	69	74	147	367	288	263	2.34	2.47	4.15	9.28	7.92	7.82	0.00258772	1.71952	up	--	--	--	--	--	--	--	Auxin response factor 17 OS=Arabidopsis thaliana OX=3702 GN=ARF17 PE=2 SV=1	--	--	PREDICTED: auxin response factor 17-like [Daucus carota subsp. sativus]
c50262.graph_c0	3734	3634	4247	10471	10132	11273	119.91	99.32	129.75	273.84	298.92	360.15	0.000397981	1.60276	up	--	--	Cellular Component: Golgi apparatus (GO:0005794);; Cellular Component: membrane (GO:0016020);; Molecular Function: O-acetyltransferase activity (GO:0016413);; Biological Process: cell wall organization or biogenesis (GO:0071554);;	--	--	--	GDSL/SGNH-like Acyl-Esterase family found in Pmr5 and Cas1p;; PMR5 N terminal Domain	Protein trichome birefringence OS=Arabidopsis thaliana OX=3702 GN=TBR PE=1 SV=1	S	Function unknown	PREDICTED: protein trichome birefringence-like [Daucus carota subsp. sativus]
c35680.graph_c0	391	821	686	111	84	110	21.05	38.41	35.83	5.11	4.25	6.18	1.51084e-06	-2.33009	down	--	--	Molecular Function: calcium ion binding (GO:0005509);; Cellular Component: photosystem II oxygen evolving complex (GO:0009654);; Biological Process: photosynthesis (GO:0015979);; Cellular Component: extrinsic component of membrane (GO:0019898);;	--	--	--	PsbP	Thylakoid lumenal 19 kDa protein, chloroplastic OS=Arabidopsis thaliana OX=3702 GN=At3g63540 PE=1 SV=2	S	Function unknown	PREDICTED: thylakoid lumenal 19 kDa protein, chloroplastic-like [Daucus carota subsp. sativus]
c45975.graph_c0	19	53	120	714	565	1872	0.93	2.3	6.11	32.96	26.57	99.17	2.28248e-08	3.8534	up	--	--	Molecular Function: iron ion binding (GO:0005506);; Cellular Component: cytoplasm (GO:0005737);; Biological Process: inositol catabolic process (GO:0019310);; Molecular Function: inositol oxygenase activity (GO:0050113);; Biological Process: oxidation-reduction process (GO:0055114);;	K00469|6.52578e-175|sind:105173576|K00469 inositol oxygenase [EC:1.13.99.1] | (RefSeq) inositol oxygenase 2-like	[R]	General function prediction only	Myo-inositol oxygenase	Inositol oxygenase 4 OS=Arabidopsis thaliana OX=3702 GN=MIOX4 PE=2 SV=1	S	Function unknown	inositol oxygenase 4-like [Helianthus annuus]
c42284.graph_c0	122	342	47	27	7	10	6.26	15.31	2.34	1.17	0.34	0.53	4.65161e-05	-3.04429	down	--	--	Molecular Function: peroxidase activity (GO:0004601);; Cellular Component: extracellular region (GO:0005576);; Biological Process: response to oxidative stress (GO:0006979);; Cellular Component: plant-type cell wall (GO:0009505);; Biological Process: plant-type cell wall organization (GO:0009664);; Cellular Component: integral component of membrane (GO:0016021);; Molecular Function: heme binding …	K00430|0|rcu:8259183|K00430 peroxidase [EC:1.11.1.7] | (RefSeq) peroxidase 19	--	--	Peroxidase	Peroxidase 19 OS=Arabidopsis thaliana OX=3702 GN=PER19 PE=2 SV=1	G	Carbohydrate transport and metabolism	PREDICTED: peroxidase 19 [Daucus carota subsp. sativus]
c48149.graph_c0	6466	8690	7668	26837	50064	47740	491.28	576.72	579.34	1776.8	3730.87	3960.75	1.95725e-07	2.58764	up	--	--	--	--	--	--	Remorin, C-terminal region;; Remorin, N-terminal region;; Remorin, C-terminal region	Remorin OS=Solanum tuberosum OX=4113 PE=1 SV=1	S	Function unknown	PREDICTED: remorin [Daucus carota subsp. sativus]
c38959.graph_c0	1302	2382	1653	504	390	429	59.36	94.5	73	19.52	16.72	20.27	9.55853e-05	-1.75326	down	[J]	Translation, ribosomal structure and biogenesis	Biological Process: maturation of LSU-rRNA (GO:0000470);; Molecular Function: RNA binding (GO:0003723);; Molecular Function: structural constituent of ribosome (GO:0003735);; Cellular Component: mitochondrion (GO:0005739);; Biological Process: translation (GO:0006412);; Cellular Component: cytosolic large ribosomal subunit (GO:0022625);;	K02863|2.60228e-154|csv:101218332|K02863 large subunit ribosomal protein L1 | (RefSeq) 50S ribosomal protein L1, chloroplastic-like	[J]	Translation, ribosomal structure and biogenesis	Ribosomal protein L1p/L10e family	50S ribosomal protein L1, chloroplastic OS=Arabidopsis thaliana OX=3702 GN=RPL1 PE=1 SV=1	J	Translation, ribosomal structure and biogenesis	PREDICTED: 50S ribosomal protein L1, chloroplastic [Daucus carota subsp. sativus]
c45104.graph_c0	343	309	407	1737	1171	900	12.16	9.58	13.94	52.51	39.75	33.21	1.03677e-05	1.90765	up	--	--	--	--	--	--	Myb/SANT-like DNA-binding domain	--	S	Function unknown	PREDICTED: uncharacterized protein LOC108227291 [Daucus carota subsp. sativus]
c42212.graph_c0	97	113	136	340	339	693	3.76	3.92	5.38	9.94	11.57	26.79	0.00028035	2.10849	up	--	--	--	--	--	--	Plant transposase (Ptta/En/Spm family)	--	S	Function unknown	PREDICTED: uncharacterized protein LOC108197210 [Daucus carota subsp. sativus]
c53168.graph_c0	2	0	3	6	10	61	0.58	0	0.89	1.45	2.75	19.67	0.00612956	3.13962	up	--	--	Molecular Function: DNA binding (GO:0003677);;	K09422|2.02129e-40|cam:101513190|K09422 myb proto-oncogene protein, plant | (RefSeq) transcription factor MYB39-like	[K]	Transcription	Myb-like DNA-binding domain;; Myb-like DNA-binding domain	Transcription factor MYB93 OS=Arabidopsis thaliana OX=3702 GN=MYB93 PE=1 SV=1	K	Transcription	PREDICTED: transcription factor MYB39-like [Daucus carota subsp. sativus]
c28654.graph_c0	195	125	215	58	48	32	10.99	6.16	11.88	2.87	2.54	1.87	0.00325805	-1.72292	down	--	--	--	--	--	--	Auxin responsive protein	--	S	Function unknown	PREDICTED: uncharacterized protein LOC108217702 [Daucus carota subsp. sativus]
c29092.graph_c0	105	101	115	20	2	9	11.04	9.48	11.84	1.77	0.2	1	7.39381e-06	-3.01262	down	--	--	--	--	--	--	--	--	--	--	PREDICTED: uncharacterized protein LOC108195013 [Daucus carota subsp. sativus]
c24332.graph_c0	6	22	8	41	59	58	0.78	2.57	1.02	4.48	7.19	7.98	0.0070849	2.16627	up	--	--	--	--	--	--	--	--	--	--	hypothetical protein DCAR_008864 [Daucus carota subsp. sativus]
c39495.graph_c0	249	300	313	501	867	891	9.59	10.21	11.24	15.05	31.4	35.32	0.00736997	1.5675	up	--	--	Biological Process: defense response to oomycetes (GO:0002229);; Cellular Component: chloroplast (GO:0009507);; Cellular Component: integral component of membrane (GO:0016021);; Biological Process: glutathione transport (GO:0034635);; Biological Process: response to cadmium ion (GO:0046686);;	--	--	--	CRT-like, chloroquine-resistance transporter-like;; CRT-like, chloroquine-resistance transporter-like	Protein CLT2, chloroplastic OS=Arabidopsis thaliana OX=3702 GN=CLT2 PE=2 SV=1	S	Function unknown	PREDICTED: protein CLT2, chloroplastic [Daucus carota subsp. sativus]
c38823.graph_c0	975	738	1101	1891	3148	3718	58.1	40.49	68	110.02	219.48	319.22	0.00199157	1.78952	up	[D]	Cell cycle control, cell division, chromosome partitioning	Molecular Function: ATP binding (GO:0005524);; Cellular Component: cytosol (GO:0005829);; Biological Process: iron-sulfur cluster assembly (GO:0016226);; Molecular Function: protein homodimerization activity (GO:0042803);; Molecular Function: metal ion binding (GO:0046872);; Molecular Function: 4 iron, 4 sulfur cluster binding (GO:0051539);;	--	[D]	Cell cycle control, cell division, chromosome partitioning	NUBPL iron-transfer P-loop NTPase;; CobQ/CobB/MinD/ParA nucleotide binding domain;; AAA domain;; Anion-transporting ATPase;; ATPase MipZ	Cytosolic Fe-S cluster assembly factor NBP35 OS=Arabidopsis thaliana OX=3702 GN=NBP35 PE=1 SV=1	D	Cell cycle control, cell division, chromosome partitioning	PREDICTED: cytosolic Fe-S cluster assembly factor NBP35-like [Daucus carota subsp. sativus]
c43056.graph_c0	489	483	214	70	14	39	29.61	25.51	12.3	3.49	0.81	2.2	4.45842e-07	-2.94757	down	--	--	Molecular Function: binding (GO:0005488);; Biological Process: regulation of transcription, DNA-templated (GO:0006355);; Biological Process: histone acetylation (GO:0016573);;	--	--	--	--	Transcription factor MYBS3 OS=Oryza sativa subsp. japonica OX=39947 GN=MYBS3 PE=2 SV=1	K	Transcription	PREDICTED: myb-like protein J [Daucus carota subsp. sativus]
c41643.graph_c0	120	69	65	1	0	0	5.93	2.18	2.31	0.03	0	0	7.75888e-11	-5.74168	down	--	--	--	--	[K]	Transcription	Endonuclease/Exonuclease/phosphatase family	Carbon catabolite repressor protein 4 homolog 3 OS=Arabidopsis thaliana OX=3702 GN=CCR4-3 PE=2 SV=2	A	RNA processing and modification	hypothetical protein DCAR_011546 [Daucus carota subsp. sativus]
c49939.graph_c1	2881	2684	3642	10482	5309	7017	102.44	82.71	125.67	317.62	177.7	258.02	0.00359925	1.38974	up	[CR]	Energy production and conversion ;; General function prediction only	--	--	[R]	General function prediction only	PPR repeat family;; PPR repeat;; PPR repeat;; Pentatricopeptide repeat domain;; Pentacotripeptide-repeat region of PRORP;; Alcohol dehydrogenase GroES-like domain	Pentatricopeptide repeat-containing protein At3g25210, mitochondrial OS=Arabidopsis thaliana OX=3702 GN=At3g25210 PE=2 SV=1	S	Function unknown	PREDICTED: pentatricopeptide repeat-containing protein At3g25210, mitochondrial [Daucus carota subsp. sativus]
c33206.graph_c0	53	316	195	246	976	1136	1.58	7.58	5.29	6.34	28.89	40.48	0.00851176	2.16472	up	--	--	Cellular Component: integral component of membrane (GO:0016021);;	--	--	--	--	--	--	--	PREDICTED: uncharacterized protein LOC108194132 isoform X2 [Daucus carota subsp. sativus]
c53022.graph_c0	4113	3556	3950	12071	7961	7689	49.72	39.41	47.73	119.82	88	89.97	0.00154813	1.35974	up	[K]	Transcription	Cellular Component: endosome (GO:0005768);; Cellular Component: vacuolar membrane (GO:0005774);; Cellular Component: trans-Golgi network (GO:0005802);; Molecular Function: S-adenosylmethionine-dependent methyltransferase activity (GO:0008757);; Biological Process: response to cytokinin (GO:0009735);; Biological Process: homogalacturonan biosynthetic process (GO:0010289);; Cellular Component: inte…	--	--	--	Putative S-adenosyl-L-methionine-dependent methyltransferase;; Methyltransferase domain;; Methyltransferase domain;; Methyltransferase domain;; Leucine rich repeat;; Leucine Rich repeats (2 copies);; Leucine-rich repeat;; Leucine Rich repeat	Probable pectin methyltransferase QUA2 OS=Arabidopsis thaliana OX=3702 GN=QUA2 PE=1 SV=2	S	Function unknown	PREDICTED: probable pectin methyltransferase QUA2 [Daucus carota subsp. sativus]
c43953.graph_c0	172	390	288	47	45	54	6.17	12.13	10.05	1.44	1.54	2.01	4.9207e-05	-2.19899	down	[QV]	Secondary metabolites biosynthesis, transport and catabolism ;; Defense mechanisms	Cellular Component: membrane (GO:0016020);; Molecular Function: oxidoreductase activity, acting on paired donors, with incorporation or reduction of molecular oxygen, NAD(P)H as one donor, and incorporation of one atom of oxygen (GO:0016709);; Biological Process: indole glucosinolate metabolic process (GO:0042343);; Biological Process: secondary metabolite biosynthetic process (GO:0044550);; Mole…	--	[Q]	Secondary metabolites biosynthesis, transport and catabolism	Cytochrome P450	Cytochrome P450 81E8 OS=Medicago truncatula OX=3880 GN=CYP81E8 PE=2 SV=1	Q	Secondary metabolites biosynthesis, transport and catabolism	PREDICTED: cytochrome P450 81E8-like [Daucus carota subsp. sativus]
c38400.graph_c1	144	292	140	30	21	31	5.9	10.03	5.6	1.08	0.78	1.16	1.08403e-05	-2.44979	down	[HC]	Coenzyme transport and metabolism ;; Energy production and conversion	Molecular Function: oxidoreductase activity, acting on paired donors, with incorporation or reduction of molecular oxygen, NAD(P)H as one donor, and incorporation of one atom of oxygen (GO:0016709);;	--	[CR]	--	FAD binding domain;; Squalene epoxidase;; FAD binding domain;; NAD(P)-binding Rossmann-like domain;; FAD dependent oxidoreductase;; FAD binding domain	Monooxygenase 3 OS=Arabidopsis thaliana OX=3702 GN=MO3 PE=2 SV=1	CH	--	PREDICTED: FAD-dependent urate hydroxylase-like isoform X1 [Daucus carota subsp. sativus]
c45378.graph_c0	2338	1271	2380	506	213	307	58.22	27.38	57.43	10.75	5	7.87	2.21412e-06	-2.33269	down	[T]	Signal transduction mechanisms	Molecular Function: protein serine/threonine kinase activity (GO:0004674);; Molecular Function: ATP binding (GO:0005524);; Biological Process: protein phosphorylation (GO:0006468);; Cellular Component: integral component of membrane (GO:0016021);;	--	[R]	General function prediction only	Protein kinase domain;; Protein tyrosine kinase	Serine/threonine-protein kinase STN7, chloroplastic OS=Arabidopsis thaliana OX=3702 GN=STN7 PE=1 SV=1	T	Signal transduction mechanisms	PREDICTED: serine/threonine-protein kinase STN7, chloroplastic [Daucus carota subsp. sativus]
c52496.graph_c0	6282	12527	8800	1425	365	1361	72.1	123.64	97.28	13.93	3.94	16.01	5.56245e-07	-2.78451	down	[H]	Coenzyme transport and metabolism	Cellular Component: mitochondrion (GO:0005739);; Cellular Component: chloroplast (GO:0009507);; Biological Process: chlorophyll biosynthetic process (GO:0015995);; Molecular Function: magnesium chelatase activity (GO:0016851);;	K03403|0|rcu:8286305|K03403 magnesium chelatase subunit H [EC:6.6.1.1] | (RefSeq) magnesium-chelatase subunit ChlH, chloroplastic	--	--	CobN/Magnesium Chelatase;; Domain of unknown function (DUF3479)	Magnesium-chelatase subunit ChlH, chloroplastic OS=Arabidopsis thaliana OX=3702 GN=CHLH PE=1 SV=1	H	Coenzyme transport and metabolism	PREDICTED: magnesium-chelatase subunit ChlH, chloroplastic [Daucus carota subsp. sativus]
c24712.graph_c0	186	378	405	4	14	11	20.16	36.52	43.09	0.37	1.43	1.26	2.12364e-13	-4.41131	down	--	--	Cellular Component: photosystem II (GO:0009523);; Biological Process: photosynthesis (GO:0015979);; Cellular Component: integral component of membrane (GO:0016021);;	--	--	--	Photosystem II reaction centre X protein (PsbX)	--	S	Function unknown	PREDICTED: uncharacterized protein LOC108210151 [Daucus carota subsp. sativus]
c49419.graph_c0	54	65	48	181	92	266	2.45	2.39	2.2	7.65	4.36	13.39	0.00537028	1.79256	up	--	--	Molecular Function: zinc ion binding (GO:0008270);;	--	[R]	General function prediction only	PPR repeat family;; DYW family of nucleic acid deaminases;; PPR repeat;; PPR repeat;; Pentatricopeptide repeat domain;; Pentacotripeptide-repeat region of PRORP	Pentatricopeptide repeat-containing protein At5g48910 OS=Arabidopsis thaliana OX=3702 GN=PCMP-H38 PE=2 SV=1	S	Function unknown	PREDICTED: pentatricopeptide repeat-containing protein At5g48910-like [Daucus carota subsp. sativus]
c40625.graph_c0	316	35	140	10	4	14	14.32	1.38	6.12	0.38	0.17	0.67	1.09697e-05	-3.47024	down	--	--	--	--	--	--	B-box zinc finger	B-box domain protein 30 OS=Arabidopsis thaliana OX=3702 GN=MIP1A PE=1 SV=1	S	Function unknown	PREDICTED: B-box domain protein 30-like [Daucus carota subsp. sativus]
c44096.graph_c0	218	95	236	17	26	23	13.71	5.68	14.17	1.34	1.55	1.51	2.52568e-05	-2.64756	down	--	--	Molecular Function: zinc ion binding (GO:0008270);; Cellular Component: chloroplast (GO:0009507);;	--	[R]	General function prediction only	DnaJ domain	--	O	Posttranslational modification, protein turnover, chaperones	PREDICTED: uncharacterized protein LOC108194067 isoform X1 [Daucus carota subsp. sativus]
c44450.graph_c0	3672	3074	4373	8240	12028	7193	158.35	115.15	182.23	292.09	466.24	308.5	0.00811639	1.44333	up	[T]	Signal transduction mechanisms	Molecular Function: protein serine/threonine kinase activity (GO:0004674);; Molecular Function: ATP binding (GO:0005524);; Biological Process: protein phosphorylation (GO:0006468);;	--	[T]	Signal transduction mechanisms	Protein kinase domain;; Protein tyrosine kinase	Probable serine/threonine-protein kinase PBL19 OS=Arabidopsis thaliana OX=3702 GN=PBL19 PE=1 SV=1	T	Signal transduction mechanisms	PREDICTED: probable receptor-like protein kinase At5g47070 [Daucus carota subsp. sativus]
c50989.graph_c0	514	981	511	131	102	214	15.92	30.23	16.32	5.08	3.48	9	0.00212535	-1.80727	down	[R]	General function prediction only	Molecular Function: zinc ion binding (GO:0008270);; Biological Process: protein ubiquitination (GO:0016567);; Molecular Function: ligase activity (GO:0016874);; Molecular Function: ubiquitin protein ligase activity (GO:0061630);;	K10143|0|vvi:100246063|K10143 E3 ubiquitin-protein ligase RFWD2 [EC:2.3.2.27] | (RefSeq) E3 ubiquitin-protein ligase COP1	--	--	WD domain, G-beta repeat;; Zinc finger, C3HC4 type (RING finger);; Zinc finger, C3HC4 type (RING finger);; Zinc finger, C3HC4 type (RING finger);; RING-type zinc-finger	E3 ubiquitin-protein ligase COP1 OS=Arabidopsis thaliana OX=3702 GN=COP1 PE=1 SV=2	S	Function unknown	PREDICTED: E3 ubiquitin-protein ligase COP1-like [Daucus carota subsp. sativus]
c50079.graph_c0	216	136	258	54	47	38	6.83	4.19	7.9	1.45	1.4	1.61	0.000953584	-1.87961	down	[G]	Carbohydrate transport and metabolism	Molecular Function: inorganic phosphate transmembrane transporter activity (GO:0005315);; Cellular Component: chloroplast thylakoid membrane (GO:0009535);; Cellular Component: integral component of membrane (GO:0016021);; Biological Process: anion transmembrane transport (GO:0098656);;	K08193|0|mdm:103422687|K08193 MFS transporter, ACS family, solute carrier family 17 (sodium-dependent inorganic phosphate cotransporter), other | (RefSeq) sodium-dependent phosphate transport protein 1, chloroplastic-like	[G]	Carbohydrate transport and metabolism	Major Facilitator Superfamily;; Sugar (and other) transporter	Sodium-dependent phosphate transport protein 1, chloroplastic OS=Arabidopsis thaliana OX=3702 GN=ANTR1 PE=1 SV=1	G	Carbohydrate transport and metabolism	PREDICTED: sodium-dependent phosphate transport protein 1, chloroplastic-like [Daucus carota subsp. sativus]
c47231.graph_c0	507	42	395	74	25	38	19.5	1.7	14.15	2.54	0.9	1.84	0.00325805	-2.42732	down	[C]	Energy production and conversion	Molecular Function: 3-chloroallyl aldehyde dehydrogenase activity (GO:0004028);; Molecular Function: aldehyde dehydrogenase (NAD) activity (GO:0004029);; Molecular Function: aldehyde dehydrogenase [NAD(P)+] activity (GO:0004030);; Biological Process: cellular aldehyde metabolic process (GO:0006081);; Cellular Component: chloroplast envelope (GO:0009941);; Molecular Function: aldehyde dehydrogenas…	K00128|0|vvi:100266331|K00128 aldehyde dehydrogenase (NAD+) [EC:1.2.1.3] | (RefSeq) aldehyde dehydrogenase family 3 member H1	[C]	Energy production and conversion	Aldehyde dehydrogenase family	Aldehyde dehydrogenase family 3 member I1, chloroplastic OS=Arabidopsis thaliana OX=3702 GN=ALDH3I1 PE=1 SV=2	C	Energy production and conversion	PREDICTED: aldehyde dehydrogenase family 3 member H1-like [Daucus carota subsp. sativus]
c40893.graph_c0	417	628	339	173	55	140	14.47	19.87	10.8	5.81	2.04	4.48	0.00505378	-1.65845	down	--	--	Biological Process: drug transmembrane transport (GO:0006855);; Molecular Function: drug transmembrane transporter activity (GO:0015238);; Molecular Function: antiporter activity (GO:0015297);; Cellular Component: integral component of membrane (GO:0016021);;	K03327|4.60433e-78|vvi:100242048|K03327 multidrug resistance protein, MATE family | (RefSeq) protein DETOXIFICATION 27	[R]	General function prediction only	MatE	Protein DETOXIFICATION 28 OS=Arabidopsis thaliana OX=3702 GN=DTX28 PE=3 SV=1	V	Defense mechanisms	PREDICTED: protein DETOXIFICATION 27-like isoform X1 [Daucus carota subsp. sativus]
c25253.graph_c0	1639	1009	1112	3456	8458	5207	151.37	85.33	100.16	275.22	746.29	512.41	4.9182e-05	2.30342	up	--	--	--	--	--	--	Phloem protein 2	Protein PHLOEM PROTEIN 2-LIKE A1 OS=Arabidopsis thaliana OX=3702 GN=PP2A1 PE=2 SV=1	--	--	PREDICTED: protein PHLOEM PROTEIN 2-LIKE A1-like [Daucus carota subsp. sativus]
c52506.graph_c0	764	432	539	2361	1015	2298	21.17	11.29	17.52	40.55	25.2	51.08	0.00131808	1.77608	up	[P]	Inorganic ion transport and metabolism	Cellular Component: integral component of plasma membrane (GO:0005887);; Molecular Function: secondary active sulfate transmembrane transporter activity (GO:0008271);; Biological Process: sulfate transmembrane transport (GO:1902358);;	K17471|0|vvi:100267000|K17471 sulfate transporter 3 | (RefSeq) probable sulfate transporter 3.4	[P]	Inorganic ion transport and metabolism	Sulfate permease family;; Integral membrane protein S linking to the trans Golgi network;; STAS domain	Probable sulfate transporter 3.4 OS=Arabidopsis thaliana OX=3702 GN=SULTR3;4 PE=2 SV=1	P	Inorganic ion transport and metabolism	PREDICTED: probable sulfate transporter 3.4 [Daucus carota subsp. sativus]
c48329.graph_c0	886	869	1258	16	18	91	30.5	24.46	41.85	0.46	0.51	2.82	8.69045e-09	-3.87741	down	[R]	General function prediction only	--	--	[G]	Carbohydrate transport and metabolism	NAD(P)H-binding;; NmrA-like family;; NAD dependent epimerase/dehydratase family;; 3-beta hydroxysteroid dehydrogenase/isomerase family;; Polysaccharide biosynthesis protein	Protein TIC 62, chloroplastic OS=Arabidopsis thaliana OX=3702 GN=TIC62 PE=1 SV=1	GM	--	PREDICTED: protein TIC 62, chloroplastic [Daucus carota subsp. sativus]
c37955.graph_c0	1095	834	5	4	8	1	76.7	51.43	0.34	0.24	0.53	0.07	0.00574469	-3.61436	down	--	--	Molecular Function: transcription factor activity, sequence-specific DNA binding (GO:0003700);; Cellular Component: intracellular (GO:0005622);; Biological Process: response to water deprivation (GO:0009414);; Biological Process: ethylene-activated signaling pathway (GO:0009873);; Biological Process: cutin biosynthetic process (GO:0010143);; Biological Process: wax metabolic process (GO:0010166);…	--	--	--	AP2 domain	Ethylene-responsive transcription factor WIN1 OS=Arabidopsis thaliana OX=3702 GN=WIN1 PE=2 SV=1	K	Transcription	PREDICTED: ethylene-responsive transcription factor WIN1-like [Daucus carota subsp. sativus]
c35942.graph_c0	1611	1128	2925	3908	11507	6498	162.57	101.17	288.88	332.6	1090.15	689.01	0.00269404	2.03678	up	--	--	--	--	--	--	--	--	S	Function unknown	PREDICTED: uncharacterized protein LOC108195030 [Daucus carota subsp. sativus]
c46527.graph_c0	2574	1491	2949	1041	590	554	122.02	62.03	133.93	41.05	25.88	26.87	0.00463985	-1.51089	down	--	--	--	--	--	--	--	--	S	Function unknown	PREDICTED: zinc finger protein CONSTANS-LIKE 1-like isoform X2 [Daucus carota subsp. sativus]
c52230.graph_c0	1175	1834	1051	8624	7345	4157	42.32	60.5	38.23	276.94	323.12	185.62	3.96607e-08	2.38748	up	[T]	Signal transduction mechanisms	Molecular Function: protein serine/threonine phosphatase activity (GO:0004722);; Biological Process: protein dephosphorylation (GO:0006470);;	--	[T]	Signal transduction mechanisms	Protein phosphatase 2C;; Stage II sporulation protein E (SpoIIE)	Probable protein phosphatase 2C 15 OS=Arabidopsis thaliana OX=3702 GN=At1g68410 PE=2 SV=1	T	Signal transduction mechanisms	PREDICTED: probable protein phosphatase 2C 15 [Daucus carota subsp. sativus]
c45950.graph_c0	925	136	584	118	59	40	32.05	4.11	19.57	3.5	1.92	1.43	0.000184453	-2.61719	down	[Q]	Secondary metabolites biosynthesis, transport and catabolism	Molecular Function: oxidoreductase activity, acting on single donors with incorporation of molecular oxygen, incorporation of two atoms of oxygen (GO:0016702);; Biological Process: oxidation-reduction process (GO:0055114);;	K09840|0|tcc:TCM_016684|K09840 9-cis-epoxycarotenoid dioxygenase [EC:1.13.11.51] | (RefSeq) Nine-cis-epoxycarotenoid dioxygenase 4	[Q]	Secondary metabolites biosynthesis, transport and catabolism	Retinal pigment epithelial membrane protein	Probable carotenoid cleavage dioxygenase 4, chloroplastic OS=Arabidopsis thaliana OX=3702 GN=CCD4 PE=1 SV=1	Q	Secondary metabolites biosynthesis, transport and catabolism	PREDICTED: probable carotenoid cleavage dioxygenase 4, chloroplastic [Daucus carota subsp. sativus]
c38583.graph_c0	327	161	350	78	43	21	26.46	11.48	27.75	5.31	3.31	1.75	0.000105062	-2.33597	down	--	--	Cellular Component: plasma membrane (GO:0005886);; Cellular Component: integral component of membrane (GO:0016021);;	--	--	--	--	CASP-like protein 5C3 OS=Arabidopsis thaliana OX=3702 GN=At1g49405 PE=2 SV=1	S	Function unknown	PREDICTED: CASP-like protein 5C1 [Daucus carota subsp. sativus]
c44121.graph_c0	10576	9081	11243	32817	32175	39612	494.66	369.95	509.82	1303.67	1412.17	1916.22	3.01172e-05	1.89579	up	--	--	Molecular Function: structural constituent of ribosome (GO:0003735);; Biological Process: translation (GO:0006412);; Biological Process: mitochondrial transport (GO:0006839);; Cellular Component: integral component of membrane (GO:0016021);; Cellular Component: mitochondrial membrane (GO:0031966);;	K15104|6.54831e-166|spen:107004666|K15104 solute carrier family 25 (mitochondrial oxoglutarate transporter), member 11 | (RefSeq) mitochondrial uncoupling protein 5	[C]	Energy production and conversion	Mitochondrial carrier protein	Mitochondrial uncoupling protein 5 OS=Arabidopsis thaliana OX=3702 GN=PUMP5 PE=2 SV=1	S	Function unknown	PREDICTED: mitochondrial uncoupling protein 5 [Daucus carota subsp. sativus]
c44630.graph_c0	434	359	354	1004	1568	1439	24.39	17.81	19.38	51.16	90.37	89.06	0.000104685	1.95839	up	--	--	--	--	[E]	Amino acid transport and metabolism	--	--	S	Function unknown	PREDICTED: methyltransferase-like protein 13 [Daucus carota subsp. sativus]
c51266.graph_c0	588	518	494	1361	1461	1280	24.17	17.34	18.62	44.48	54.81	52.73	0.00106786	1.50834	up	[T]	Signal transduction mechanisms	Molecular Function: calmodulin-dependent protein kinase activity (GO:0004683);; Molecular Function: calmodulin binding (GO:0005516);; Molecular Function: ATP binding (GO:0005524);; Cellular Component: nucleus (GO:0005634);; Cellular Component: cytoplasm (GO:0005737);; Cellular Component: plasma membrane (GO:0005886);; Biological Process: abscisic acid-activated signaling pathway (GO:0009738);; Mo…	--	[T]	Signal transduction mechanisms	Protein kinase domain;; Protein tyrosine kinase	Calcium-dependent protein kinase 1 OS=Arabidopsis thaliana OX=3702 GN=CPK1 PE=1 SV=1	T	Signal transduction mechanisms	PREDICTED: calcium-dependent protein kinase 26 [Daucus carota subsp. sativus]
c44869.graph_c0	294	185	469	931	820	1447	61.75	34.84	99.64	169.03	168.21	348.18	0.0030046	1.84047	up	--	--	--	K09286|5.29881e-16|cmo:103484041|K09286 EREBP-like factor | (RefSeq) dehydration-responsive element-binding protein 1A	--	--	--	Dehydration-responsive element-binding protein 1B OS=Arabidopsis thaliana OX=3702 GN=DREB1B PE=1 SV=2	--	--	hypothetical protein DCAR_020227 [Daucus carota subsp. sativus]
c51645.graph_c0	503	1097	2472	277	17	88	6.67	12.51	31.53	3.13	0.21	1.2	8.65337e-05	-3.0521	down	--	--	--	--	--	--	WD domain, G-beta repeat	Putative E3 ubiquitin-protein ligase LIN-1 OS=Lotus japonicus OX=34305 GN=CERBERUS PE=2 SV=2	S	Function unknown	PREDICTED: putative E3 ubiquitin-protein ligase LIN-1 [Daucus carota subsp. sativus]
c39989.graph_c0	1397	712	1337	2955	3226	4272	64.07	28.34	59.73	115.05	139.69	202.84	0.00245519	1.7217	up	--	--	--	K09286|9.19884e-61|sind:105173545|K09286 EREBP-like factor | (RefSeq) ethylene-responsive transcription factor TINY-like	--	--	AP2 domain	Dehydration-responsive element-binding protein 3 OS=Arabidopsis thaliana OX=3702 GN=DREB3 PE=2 SV=1	K	Transcription	PREDICTED: dehydration-responsive element-binding protein 3-like [Daucus carota subsp. sativus]
c48601.graph_c0	560	63	351	18	4	25	24.01	2.34	14.57	0.65	0.16	1.1	1.42789e-06	-3.70537	down	--	--	--	--	--	--	Petal formation-expressed	Probable F-box protein At4g22030 OS=Arabidopsis thaliana OX=3702 GN=At4g22030 PE=4 SV=1	S	Function unknown	PREDICTED: probable F-box protein At4g22030 [Daucus carota subsp. sativus]
c45206.graph_c0	869	969	868	402	186	152	41.7	40.75	40.89	16.49	8.54	7.57	0.000262674	-1.70973	down	--	--	--	--	--	--	--	Uncharacterized protein At5g39570 OS=Arabidopsis thaliana OX=3702 GN=At5g39570 PE=1 SV=1	S	Function unknown	PREDICTED: uncharacterized protein LOC108224132 [Daucus carota subsp. sativus]
c48219.graph_c0	249	321	436	670	1156	1687	8.21	9.14	13.92	18.11	35.54	54.72	0.00168442	1.94796	up	[T]	Signal transduction mechanisms	Biological Process: maturation of SSU-rRNA from tricistronic rRNA transcript (SSU-rRNA, 5.8S rRNA, LSU-rRNA) (GO:0000462);; Cellular Component: nucleolus (GO:0005730);; Cellular Component: 90S preribosome (GO:0030686);; Cellular Component: small-subunit processome (GO:0032040);;	K14768|0|vvi:100241077|K14768 U3 small nucleolar RNA-associated protein 7 | (RefSeq) probable U3 small nucleolar RNA-associated protein 7	[A]	RNA processing and modification	BING4CT (NUC141) domain;; Anaphase-promoting complex subunit 4 WD40 domain;; WD domain, G-beta repeat	Katanin p80 WD40 repeat-containing subunit B1 homolog OS=Arabidopsis thaliana OX=3702 GN=At5g23430 PE=2 SV=3	S	Function unknown	PREDICTED: probable U3 small nucleolar RNA-associated protein 7 [Daucus carota subsp. sativus]
c50498.graph_c0	5755	8149	5474	27178	18389	20721	106.82	130.39	97.99	429.24	320.38	395.01	1.82772e-06	1.89703	up	[T]	Signal transduction mechanisms	Molecular Function: protein serine/threonine kinase activity (GO:0004674);; Molecular Function: ATP binding (GO:0005524);; Cellular Component: plasma membrane (GO:0005886);; Cellular Component: plasmodesma (GO:0009506);; Biological Process: response to ethylene (GO:0009723);; Biological Process: response to brassinosteroid (GO:0009741);; Biological Process: negative regulation of abscisic acid-ac…	--	[T]	Signal transduction mechanisms	Protein tyrosine kinase;; Carbohydrate-binding protein of the ER;; Protein kinase domain;; Di-glucose binding within endoplasmic reticulum	Receptor-like protein kinase FERONIA OS=Arabidopsis thaliana OX=3702 GN=FER PE=1 SV=1	T	Signal transduction mechanisms	PREDICTED: receptor-like protein kinase FERONIA [Daucus carota subsp. sativus]
c52763.graph_c0	702	28	123	0	0	0	14.21	0.96	2.36	0	0	0	0.000658735	-4.23018	down	[V]	Defense mechanisms	Molecular Function: hydrolase activity (GO:0016787);;	--	[Q]	Secondary metabolites biosynthesis, transport and catabolism	ABC transporter;; ABC transporter transmembrane region;; AAA domain, putative AbiEii toxin, Type IV TA system;; P-loop containing region of AAA domain;; Dynamin family;; 50S ribosome-binding GTPase	ABC transporter C family member 1 OS=Arabidopsis thaliana OX=3702 GN=ABCC1 PE=1 SV=1	V	Defense mechanisms	hypothetical protein CHLRE_02g097800v5 [Chlamydomonas reinhardtii]
c43723.graph_c0	1320	2345	2874	215	363	318	140.93	227.66	310.13	18.41	36.81	35.91	3.35783e-06	-2.48297	down	--	--	Cellular Component: cytochrome b6f complex (GO:0009512);; Cellular Component: integral component of membrane (GO:0016021);;	--	--	--	PetM family of cytochrome b6f complex subunit 7	Cytochrome b6-f complex subunit 7 (Fragment) OS=Spinacia oleracea OX=3562 GN=petM PE=1 SV=1	S	Function unknown	PREDICTED: uncharacterized protein LOC108210777 [Daucus carota subsp. sativus]
c48182.graph_c0	240	413	201	104	77	77	9.17	14.23	7.47	3.59	2.86	3.34	0.00732143	-1.46831	down	[R]	General function prediction only	--	--	--	--	Protein of unknown function (DUF3326);; Protein of unknown function (DUF3326)	--	S	Function unknown	PREDICTED: uncharacterized lipoprotein syc1174_c-like [Daucus carota subsp. sativus]
c37259.graph_c0	807	2000	945	239	336	341	60.59	131.83	69.01	15.11	23.83	26.69	0.00491608	-1.67003	down	[J]	Translation, ribosomal structure and biogenesis	Biological Process: cytoplasmic translation (GO:0002181);; Molecular Function: structural constituent of ribosome (GO:0003735);; Cellular Component: ribosome (GO:0005840);; Molecular Function: rRNA binding (GO:0019843);;	K02933|4.01004e-125|mdm:103429082|K02933 large subunit ribosomal protein L6 | (RefSeq) 50S ribosomal protein L6, chloroplastic-like	[J]	Translation, ribosomal structure and biogenesis	Ribosomal protein L6	50S ribosomal protein L6, chloroplastic OS=Arabidopsis thaliana OX=3702 GN=RPL6 PE=2 SV=1	J	Translation, ribosomal structure and biogenesis	PREDICTED: 50S ribosomal protein L6, chloroplastic [Daucus carota subsp. sativus]
c52378.graph_c0	627	851	575	1479	1754	2517	16.99	17.77	13.34	31.03	40.42	73.13	0.00189043	1.66768	up	--	;;	Molecular Function: protein serine/threonine kinase activity (GO:0004674);; Molecular Function: ATP binding (GO:0005524);; Biological Process: protein phosphorylation (GO:0006468);;	--	[T]	Signal transduction mechanisms	Ethylene-responsive protein kinase Le-CTR1;; Protein tyrosine kinase;; Protein tyrosine kinase;; Protein kinase domain	Serine/threonine-protein kinase CTR1 OS=Arabidopsis thaliana OX=3702 GN=CTR1 PE=1 SV=1	T	Signal transduction mechanisms	PREDICTED: serine/threonine-protein kinase EDR1-like [Daucus carota subsp. sativus]
c41092.graph_c0	7	70	6	1	0	0	0.42	3.66	0.35	0.05	0	0	0.001094	-3.8333	down	--	--	--	K17479|1.83296e-78|vvi:100262979|K17479 glutaredoxin domain-containing cysteine-rich protein 1 | (RefSeq) uncharacterized protein At3g28850	[O]	Posttranslational modification, protein turnover, chaperones	Glutaredoxin	Uncharacterized protein At5g39865 OS=Arabidopsis thaliana OX=3702 GN=At5g39865 PE=2 SV=1	O	Posttranslational modification, protein turnover, chaperones	PREDICTED: uncharacterized protein At3g28850-like [Daucus carota subsp. sativus]
c43326.graph_c0	254	68	104	23	10	17	11.07	2.62	4.38	0.84	0.39	0.8	8.79201e-05	-2.70732	down	[T]	Signal transduction mechanisms	Molecular Function: protein serine/threonine kinase activity (GO:0004674);; Molecular Function: ATP binding (GO:0005524);; Biological Process: protein phosphorylation (GO:0006468);;	K04733|1.26944e-180|pmum:103330647|K04733 interleukin-1 receptor-associated kinase 4 [EC:2.7.11.1] | (RefSeq) protein kinase 2A, chloroplastic-like	[T]	Signal transduction mechanisms	Protein tyrosine kinase;; Protein kinase domain	Probable serine/threonine-protein kinase PBL3 OS=Arabidopsis thaliana OX=3702 GN=PBL3 PE=1 SV=1	T	Signal transduction mechanisms	PREDICTED: protein kinase 2B, chloroplastic-like [Daucus carota subsp. sativus]
c35231.graph_c0	7886	12886	20241	2094	4507	3142	909.21	1327.85	2290.46	203.41	488.08	382.36	0.0085873	-1.71523	down	[C]	Energy production and conversion	Molecular Function: electron carrier activity (GO:0009055);; Biological Process: electron transport chain (GO:0022900);; Molecular Function: metal ion binding (GO:0046872);; Molecular Function: 2 iron, 2 sulfur cluster binding (GO:0051537);;	K02639|5.88606e-52|gmx:100813636|K02639 ferredoxin | (RefSeq) ferredoxin-A-like	--	--	2Fe-2S iron-sulfur cluster binding domain	Ferredoxin-1, chloroplastic OS=Solanum lycopersicum OX=4081 GN=SEND33 PE=2 SV=1	C	Energy production and conversion	PREDICTED: ferredoxin-like isoform X1 [Daucus carota subsp. sativus]
c45792.graph_c0	93	235	48	46	11	11	4.66	10.48	2.46	2.02	0.55	0.56	0.00774606	-2.14522	down	--	--	Biological Process: single-organism cellular process (GO:0044763);;	K16732|2.03439e-82|sind:105160551|K16732 protein regulator of cytokinesis 1 | (RefSeq) 65-kDa microtubule-associated protein 3	[DZ]	--	Microtubule associated protein (MAP65/ASE1 family);; Microtubule associated protein (MAP65/ASE1 family)	65-kDa microtubule-associated protein 3 OS=Arabidopsis thaliana OX=3702 GN=MAP65-3 PE=1 SV=1	S	Function unknown	PREDICTED: 65-kDa microtubule-associated protein 3-like isoform X2 [Daucus carota subsp. sativus]
c47078.graph_c0	483	195	1239	199	114	70	23.5	8.31	58.77	8.74	5.42	3.6	0.0056381	-2.07627	down	--	--	--	--	--	--	--	Protein ABIL3 OS=Arabidopsis thaliana OX=3702 GN=ABIL3 PE=2 SV=1	--	--	PREDICTED: protein ABIL2 isoform X1 [Daucus carota subsp. sativus]
c31012.graph_c0	73	119	58	26	3	6	4.52	6.5	3.49	1.36	0.17	0.39	0.00118222	-2.50698	down	--	--	Molecular Function: DNA binding (GO:0003677);; Cellular Component: integral component of membrane (GO:0016021);;	K09422|3.98993e-52|gra:105763188|K09422 myb proto-oncogene protein, plant | (RefSeq) protein ODORANT1-like	[K]	Transcription	Myb-like DNA-binding domain;; Myb-like DNA-binding domain;; Myb-like DNA-binding domain	Transcription factor MYB20 OS=Arabidopsis thaliana OX=3702 GN=MYB20 PE=2 SV=1	K	Transcription	PREDICTED: protein ODORANT1-like [Daucus carota subsp. sativus]
c33393.graph_c0	786	249	535	182	71	57	41.77	11.57	27.59	8.2	3.54	3.14	0.000619243	-2.14557	down	[Q]	Secondary metabolites biosynthesis, transport and catabolism	Molecular Function: metal ion binding (GO:0046872);; Molecular Function: dioxygenase activity (GO:0051213);; Biological Process: oxidation-reduction process (GO:0055114);;	--	[QR]	--	2OG-Fe(II) oxygenase superfamily;; non-haem dioxygenase in morphine synthesis N-terminal	1-aminocyclopropane-1-carboxylate oxidase homolog 1 OS=Arabidopsis thaliana OX=3702 GN=At1g06620 PE=2 SV=1	S	Function unknown	PREDICTED: 1-aminocyclopropane-1-carboxylate oxidase homolog 1-like [Daucus carota subsp. sativus]
c42717.graph_c0	67	63	146	768	379	892	3.89	3.13	9.04	37.2	20.47	51.42	4.25802e-07	2.85898	up	--	--	--	--	[KL]	--	SNF2 family N-terminal domain	Helicase-like transcription factor CHR27 OS=Arabidopsis thaliana OX=3702 GN=CHR27 PE=1 SV=1	L	Replication, recombination and repair	PREDICTED: helicase-like transcription factor CHR28 isoform X1 [Daucus carota subsp. sativus]
c51822.graph_c0	681	615	527	3782	2999	5213	14.69	11.43	11.02	73.73	60.79	124.77	3.87498e-10	2.81955	up	--	--	--	K08596|8.74935e-177|vvi:104882498|K08596 sentrin-specific protease 7 [EC:3.4.22.68] | (RefSeq) probable ubiquitin-like-specific protease 2B	[O]	Posttranslational modification, protein turnover, chaperones	Ulp1 protease family, C-terminal catalytic domain	Probable ubiquitin-like-specific protease 2B OS=Arabidopsis thaliana OX=3702 GN=ULP2B PE=1 SV=3	O	Posttranslational modification, protein turnover, chaperones	PREDICTED: probable ubiquitin-like-specific protease 2B isoform X1 [Daucus carota subsp. sativus]
c45638.graph_c0	307	367	392	31	28	24	14.09	14.68	17.48	1.21	1.21	1.14	1.01336e-13	-3.35684	down	[I]	Lipid transport and metabolism	Cellular Component: chloroplast thylakoid (GO:0009534);; Cellular Component: chloroplast envelope (GO:0009941);; Molecular Function: hydrolase activity (GO:0016787);;	--	[R]	General function prediction only	Alpha/beta hydrolase family;; alpha/beta hydrolase fold;; Serine aminopeptidase, S33	Pheophytinase, chloroplastic OS=Arabidopsis thaliana OX=3702 GN=PPH PE=1 SV=1	S	Function unknown	PREDICTED: uncharacterized hydrolase YugF [Daucus carota subsp. sativus]
c50100.graph_c0	2069	3115	3806	488	437	591	87.54	115.29	156.31	18.61	17.64	26.62	2.16629e-06	-2.2601	down	[G]	Carbohydrate transport and metabolism	Molecular Function: nucleic acid binding (GO:0003676);; Molecular Function: zinc ion binding (GO:0008270);; Biological Process: DNA integration (GO:0015074);; Molecular Function: ADP binding (GO:0043531);;	--	[R]	General function prediction only	Reverse transcriptase (RNA-dependent DNA polymerase);; Fructose-1-6-bisphosphatase, N-terminal domain	Retrovirus-related Pol polyprotein from transposon TNT 1-94 OS=Nicotiana tabacum OX=4097 PE=2 SV=1	L	Replication, recombination and repair	hypothetical protein VITISV_025855, partial [Vitis vinifera]
c38442.graph_c0	1231	2360	1296	410	303	395	77.67	130.45	79.39	21.81	17.88	25.88	9.13171e-05	-1.85504	down	[J]	Translation, ribosomal structure and biogenesis	Molecular Function: structural constituent of ribosome (GO:0003735);; Cellular Component: ribosome (GO:0005840);; Biological Process: translation (GO:0006412);;	K02906|1.16497e-131|rcu:8282021|K02906 large subunit ribosomal protein L3 | (RefSeq) 50S ribosomal protein L3, chloroplastic	[J]	Translation, ribosomal structure and biogenesis	Ribosomal protein L3	50S ribosomal protein L3, chloroplastic (Fragment) OS=Nicotiana tabacum OX=4097 GN=RPL3 PE=2 SV=1	J	Translation, ribosomal structure and biogenesis	PREDICTED: 50S ribosomal protein L3, chloroplastic [Daucus carota subsp. sativus]
c42558.graph_c1	264	47	59	14	15	13	13.09	2.7	3.42	0.57	1.36	0.97	0.000976235	-2.63462	down	[E]	Amino acid transport and metabolism	Molecular Function: 3-dehydroquinate dehydratase activity (GO:0003855);; Molecular Function: shikimate 3-dehydrogenase (NADP+) activity (GO:0004764);; Biological Process: oxidation-reduction process (GO:0055114);;	K13832|7.60361e-171|cit:102617624|K13832 3-dehydroquinate dehydratase / shikimate dehydrogenase [EC:4.2.1.10 1.1.1.25] | (RefSeq) bifunctional 3-dehydroquinate dehydratase/shikimate dehydrogenase, chloroplastic	[E]	Amino acid transport and metabolism	Type I 3-dehydroquinase;; Shikimate dehydrogenase substrate binding domain	Bifunctional 3-dehydroquinate dehydratase/shikimate dehydrogenase, chloroplastic OS=Arabidopsis thaliana OX=3702 GN=EMB3004 PE=1 SV=1	E	Amino acid transport and metabolism	PREDICTED: bifunctional 3-dehydroquinate dehydratase/shikimate dehydrogenase, chloroplastic isoform X1 [Daucus carota subsp. sativus]
c33504.graph_c0	92	111	136	365	354	442	4.99	7.17	9.69	19.19	24.13	33.03	0.000164533	1.8999	up	--	--	--	--	--	--	Protein of unknown function (DUF2781);; Protein of unknown function (DUF2781)	--	S	Function unknown	PREDICTED: uncharacterized protein LOC108226846 [Daucus carota subsp. sativus]
c46994.graph_c1	926	1060	1239	5963	4325	5957	36.12	36.88	48	194.77	168.54	253.18	5.32132e-09	2.43178	up	--	--	--	K19366|9.16915e-144|cit:102608259|K19366 spartin | (RefSeq) uncharacterized LOC102608259	--	--	Senescence-associated protein	Protein EARLY-RESPONSIVE TO DEHYDRATION 7, chloroplastic OS=Arabidopsis thaliana OX=3702 GN=ERD7 PE=1 SV=1	S	Function unknown	PREDICTED: uncharacterized protein LOC108201970 isoform X2 [Daucus carota subsp. sativus]
c40796.graph_c0	506	1431	66	40	4	23	42.17	107.87	5.48	2.82	0.36	2.07	3.66954e-07	-4.08786	down	--	--	Molecular Function: cellulase activity (GO:0008810);; Biological Process: cellulose catabolic process (GO:0030245);; Molecular Function: carbohydrate binding (GO:0030246);;	--	--	--	Carbohydrate binding domain CBM49;; Glycosyl hydrolase family 9	Endoglucanase 6 OS=Arabidopsis thaliana OX=3702 GN=At1g64390 PE=2 SV=2	G	Carbohydrate transport and metabolism	hypothetical protein DCAR_027704 [Daucus carota subsp. sativus]
c40767.graph_c0	78	290	37	23	6	14	4.23	13.43	1.82	1.09	0.3	0.8	0.000793745	-2.70751	down	--	--	Molecular Function: binding (GO:0005488);;	K18636|2.25979e-151|cit:102620698|K18636 microtubule-binding protein TANGLED1 | (RefSeq) microtubule-binding protein TANGLED	[R]	General function prediction only	--	Probable microtubule-binding protein TANGLED OS=Arabidopsis thaliana OX=3702 GN=TAN PE=1 SV=1	S	Function unknown	hypothetical protein DCAR_003332 [Daucus carota subsp. sativus]
c42860.graph_c0	772	669	397	131	112	86	26.02	19.55	12.94	3.75	3.54	2.99	2.22136e-06	-2.21103	down	[V]	Defense mechanisms	Biological Process: drug transmembrane transport (GO:0006855);; Molecular Function: drug transmembrane transporter activity (GO:0015238);; Molecular Function: antiporter activity (GO:0015297);; Cellular Component: integral component of membrane (GO:0016021);;	K03327|0|sot:102583997|K03327 multidrug resistance protein, MATE family | (RefSeq) protein DETOXIFICATION 29-like	[R]	General function prediction only	MatE	Protein DETOXIFICATION 31 OS=Arabidopsis thaliana OX=3702 GN=DTX31 PE=2 SV=1	V	Defense mechanisms	PREDICTED: protein DETOXIFICATION 30-like [Daucus carota subsp. sativus]
c52475.graph_c0	622	560	557	1710	827	1706	20.67	14.19	16.28	33.92	25.29	41.35	0.00866223	1.40089	up	[P]	Inorganic ion transport and metabolism	Molecular Function: magnesium ion binding (GO:0000287);; Molecular Function: phospholipid-translocating ATPase activity (GO:0004012);; Molecular Function: ATP binding (GO:0005524);; Cellular Component: integral component of membrane (GO:0016021);; Biological Process: phospholipid translocation (GO:0045332);;	K14802|0|jcu:105649807|K14802 phospholipid-transporting ATPase [EC:3.6.3.1] | (RefSeq) phospholipid-transporting ATPase 3	[R]	General function prediction only	Phospholipid-translocating P-type ATPase C-terminal;; Phospholipid-translocating ATPase N-terminal;; Cation transport ATPase (P-type);; haloacid dehalogenase-like hydrolase;; E1-E2 ATPase	Phospholipid-transporting ATPase 3 OS=Arabidopsis thaliana OX=3702 GN=ALA3 PE=1 SV=2	P	Inorganic ion transport and metabolism	PREDICTED: phospholipid-transporting ATPase 3 [Daucus carota subsp. sativus]
c51850.graph_c0	753	1606	1068	68	136	150	12.63	22.2	17.39	1.79	2.7	2.57	3.75078e-07	-2.80684	down	[O]	Posttranslational modification, protein turnover, chaperones	Molecular Function: serine-type endopeptidase activity (GO:0004252);; Cellular Component: cell wall (GO:0005618);; Biological Process: proteolysis (GO:0006508);; Cellular Component: external side of plasma membrane (GO:0009897);; Biological Process: stomatal complex morphogenesis (GO:0010103);; Molecular Function: 2-alkenal reductase [NAD(P)] activity (GO:0032440);; Biological Process: regulation…	--	--	--	Subtilase family;; Peptidase inhibitor I9;; PA domain;; Psb28 protein	Subtilisin-like protease SBT1.2 OS=Arabidopsis thaliana OX=3702 GN=SBT1.2 PE=2 SV=1	O	Posttranslational modification, protein turnover, chaperones	PREDICTED: subtilisin-like protease SBT1.2 [Daucus carota subsp. sativus]
c25581.graph_c0	184	319	503	103	30	60	10.97	16.65	29.14	5.2	1.68	3.72	0.000577934	-2.14058	down	[I]	Lipid transport and metabolism	Molecular Function: hydrolase activity (GO:0016787);;	--	[V]	Defense mechanisms	alpha/beta hydrolase fold;; Carboxylesterase family;; Steryl acetyl hydrolase	Carboxylesterase 1 OS=Actinidia eriantha OX=165200 GN=CXE1 PE=1 SV=1	I	Lipid transport and metabolism	PREDICTED: carboxylesterase 1-like [Daucus carota subsp. sativus]
c36095.graph_c0	6	9	2	40	16	57	0.77	0.69	0.23	2.78	1.23	5.06	0.00479369	2.55745	up	--	--	Biological Process: microtubule cytoskeleton organization (GO:0000226);; Biological Process: cytokinesis (GO:0000910);; Molecular Function: microtubule binding (GO:0008017);;	K16732|6.28885e-27|sind:105174910|K16732 protein regulator of cytokinesis 1 | (RefSeq) 65-kDa microtubule-associated protein 1	[DZ]	--	--	65-kDa microtubule-associated protein 2 OS=Arabidopsis thaliana OX=3702 GN=MAP65-2 PE=1 SV=1	S	Function unknown	PREDICTED: 65-kDa microtubule-associated protein 1-like [Daucus carota subsp. sativus]
c38006.graph_c0	9	1	3	10	168	6	0.85	0.08	0.3	0.8	17.45	0.65	0.00474134	3.13852	up	[O]	Posttranslational modification, protein turnover, chaperones	Cellular Component: cell (GO:0005623);; Molecular Function: electron carrier activity (GO:0009055);; Molecular Function: protein disulfide oxidoreductase activity (GO:0015035);; Biological Process: cell redox homeostasis (GO:0045454);; Biological Process: oxidation-reduction process (GO:0055114);;	K03676|5.00431e-50|sind:105171482|K03676 glutaredoxin 3 | (RefSeq) monothiol glutaredoxin-S4-like	[O]	Posttranslational modification, protein turnover, chaperones	Glutaredoxin	Monothiol glutaredoxin-S2 OS=Arabidopsis thaliana OX=3702 GN=GRXS2 PE=3 SV=1	O	Posttranslational modification, protein turnover, chaperones	PREDICTED: monothiol glutaredoxin-S2-like [Daucus carota subsp. sativus]
c40430.graph_c0	956	323	738	289	100	162	50.97	15.16	38.22	13.08	5.01	8.94	0.00972004	-1.68265	down	[C]	Energy production and conversion	Molecular Function: iron ion binding (GO:0005506);; Molecular Function: electron carrier activity (GO:0009055);;	--	[O]	Posttranslational modification, protein turnover, chaperones	DnaJ domain;; 4Fe-4S single cluster domain of Ferredoxin I;; 4Fe-4S single cluster domain;; 4Fe-4S binding domain	Chaperone protein dnaJ C76, chloroplastic OS=Arabidopsis thaliana OX=3702 GN=DJC76 PE=2 SV=1	C	Energy production and conversion	PREDICTED: protein CAJ1 [Daucus carota subsp. sativus]
c44371.graph_c0	270	507	171	5163	7843	3650	15.9	26.9	9.79	272.96	471.36	239.15	2.87025e-16	4.13524	up	[G]	Carbohydrate transport and metabolism	Molecular Function: hydrolase activity, hydrolyzing O-glycosyl compounds (GO:0004553);; Cellular Component: cell wall (GO:0005618);; Biological Process: xyloglucan metabolic process (GO:0010411);; Molecular Function: xyloglucan:xyloglucosyl transferase activity (GO:0016762);; Biological Process: cell wall biogenesis (GO:0042546);; Cellular Component: apoplast (GO:0048046);; Biological Process: ce…	K14504|4.96555e-80|vvi:100261619|K14504 xyloglucan:xyloglucosyl transferase TCH4 [EC:2.4.1.207] | (RefSeq) probable xyloglucan endotransglucosylase/hydrolase protein 23	--	--	Glycosyl hydrolases family 16;; Xyloglucan endo-transglycosylase (XET) C-terminus	Probable xyloglucan endotransglucosylase/hydrolase protein 23 OS=Arabidopsis thaliana OX=3702 GN=XTH23 PE=2 SV=1	G	Carbohydrate transport and metabolism	hypothetical protein DCAR_017966 [Daucus carota subsp. sativus]
c31757.graph_c0	71	49	39	188	163	133	4.84	2.93	2.59	10.84	10.43	9.44	0.00231557	1.69473	up	[D]	Cell cycle control, cell division, chromosome partitioning	Molecular Function: protein serine/threonine kinase activity (GO:0004674);; Molecular Function: ATP binding (GO:0005524);; Biological Process: protein phosphorylation (GO:0006468);; Biological Process: signal transduction (GO:0007165);; Cellular Component: membrane (GO:0016020);;	--	[T]	Signal transduction mechanisms	NAF domain;; Protein kinase domain;; Protein tyrosine kinase	CBL-interacting protein kinase 2 OS=Oryza sativa subsp. japonica OX=39947 GN=CIPK2 PE=2 SV=1	T	Signal transduction mechanisms	PREDICTED: CBL-interacting protein kinase 18-like isoform X1 [Daucus carota subsp. sativus]
c50756.graph_c0	149	104	47	20	8	9	4.61	2.78	1.45	0.58	0.22	0.29	0.000110531	-2.65086	down	--	--	Molecular Function: calmodulin binding (GO:0005516);; Cellular Component: plasma membrane (GO:0005886);; Biological Process: defense response (GO:0006952);; Biological Process: response to biotic stimulus (GO:0009607);; Cellular Component: integral component of membrane (GO:0016021);;	K08472|0|sind:105177011|K08472 mlo protein | (RefSeq) MLO-like protein 11	--	--	Mlo family	MLO-like protein 14 OS=Arabidopsis thaliana OX=3702 GN=MLO14 PE=2 SV=1	D	Cell cycle control, cell division, chromosome partitioning	PREDICTED: MLO-like protein 14 [Daucus carota subsp. sativus]
c40854.graph_c0	1459	1084	1614	2653	4943	4553	86.5	56.25	92.94	133.26	275.13	280.35	0.00336551	1.70185	up	--	--	Molecular Function: DNA binding (GO:0003677);; Molecular Function: transcription factor activity, sequence-specific DNA binding (GO:0003700);; Cellular Component: nucleus (GO:0005634);; Biological Process: regulation of transcription, DNA-templated (GO:0006355);;	K09286|1.51114e-12|sot:102597562|K09286 EREBP-like factor | (RefSeq) ERF4; ethylene-responsive transcription factor 3-like	--	--	AP2 domain	Ethylene-responsive transcription factor 3 OS=Nicotiana tabacum OX=4097 GN=ERF3 PE=2 SV=1	K	Transcription	PREDICTED: ethylene-responsive transcription factor 3-like [Daucus carota subsp. sativus]
c44018.graph_c0	1250	1341	2091	147	133	193	53.47	49.93	86.66	5.34	5.34	8.54	5.46715e-10	-2.96168	down	[M]	Cell wall/membrane/envelope biogenesis	Molecular Function: catalytic activity (GO:0003824);; Molecular Function: coenzyme binding (GO:0050662);;	--	--	--	NAD dependent epimerase/dehydratase family;; GDP-mannose 4,6 dehydratase;; NAD(P)H-binding	Chloroplast stem-loop binding protein of 41 kDa b, chloroplastic OS=Arabidopsis thaliana OX=3702 GN=CSP41B PE=1 SV=1	S	Function unknown	PREDICTED: chloroplast stem-loop binding protein of 41 kDa b, chloroplastic [Daucus carota subsp. sativus]
c33367.graph_c0	68	187	10	3	0	2	21.86	57.51	3.28	0.79	0	0.71	2.22994e-06	-4.37805	down	[G]	Carbohydrate transport and metabolism	Molecular Function: cellulase activity (GO:0008810);; Biological Process: cellulose catabolic process (GO:0030245);; Molecular Function: polysaccharide binding (GO:0030247);;	--	--	--	Glycosyl hydrolase family 9	Endoglucanase 6 OS=Arabidopsis thaliana OX=3702 GN=At1g64390 PE=2 SV=2	G	Carbohydrate transport and metabolism	hypothetical protein POPTR_001G092200v3 [Populus trichocarpa]
c49333.graph_c1	3308	2823	3588	10209	14541	12144	315.94	236.62	327.13	693.36	1068.58	1009.22	1.25044e-05	2.05999	up	--	--	Biological Process: vacuolar transport (GO:0007034);; Cellular Component: endosome membrane (GO:0010008);; Biological Process: intralumenal vesicle formation (GO:0070676);;	K12194|3.10127e-36|spen:107018618|K12194 charged multivesicular body protein 4 | (RefSeq) vacuolar protein sorting-associated protein 32 homolog 2	[U]	Intracellular trafficking, secretion, and vesicular transport	Snf7;; Snf7	Vacuolar protein sorting-associated protein 32 homolog 1 OS=Arabidopsis thaliana OX=3702 GN=VPS32.1 PE=1 SV=1	U	Intracellular trafficking, secretion, and vesicular transport	PREDICTED: vacuolar protein sorting-associated protein 32 homolog 2 [Juglans regia]
c46133.graph_c1	2211	1010	3216	1051	346	283	78.04	30.93	109.77	31.5	11.46	10.3	0.00769335	-1.79914	down	--	--	--	--	--	--	--	--	S	Function unknown	PREDICTED: uncharacterized protein LOC108205731 [Daucus carota subsp. sativus]
c39438.graph_c0	1588	1251	1586	37	109	66	146.93	102.66	143.05	2.89	9.47	6.43	4.10912e-13	-3.87077	down	--	--	Molecular Function: electron carrier activity (GO:0009055);; Biological Process: response to water deprivation (GO:0009414);; Cellular Component: chloroplast thylakoid membrane (GO:0009535);; Biological Process: response to high light intensity (GO:0009644);; Biological Process: photosynthetic electron transport in photosystem I (GO:0009773);; Biological Process: photoprotection (GO:0010117);; Bi…	--	--	--	--	Protein PROTON GRADIENT REGULATION 5, chloroplastic OS=Arabidopsis thaliana OX=3702 GN=PGR5 PE=1 SV=1	S	Function unknown	PREDICTED: protein PROTON GRADIENT REGULATION 5, chloroplastic [Daucus carota subsp. sativus]
c38939.graph_c0	125	42	61	3	0	5	6.85	2.01	3.24	0.15	0	0.28	9.81424e-07	-3.97626	down	--	--	--	--	[K]	Transcription	B-box zinc finger	Zinc finger protein CONSTANS-LIKE 16 OS=Arabidopsis thaliana OX=3702 GN=COL16 PE=1 SV=2	K	Transcription	PREDICTED: zinc finger protein CONSTANS-LIKE 16-like [Daucus carota subsp. sativus]
c49264.graph_c1	655	572	150	44	11	10	28.87	21.69	5.79	1.87	0.37	0.52	4.97358e-10	-3.96844	down	[I]	Lipid transport and metabolism	Biological Process: sphingolipid metabolic process (GO:0006665);; Cellular Component: integral component of membrane (GO:0016021);; Molecular Function: oxidoreductase activity (GO:0016491);; Molecular Function: metal ion binding (GO:0046872);; Biological Process: oxidation-reduction process (GO:0055114);;	K13076|0|sind:105173143|K13076 Delta8-fatty-acid desaturase [EC:1.14.19.4] | (RefSeq) delta(8)-fatty-acid desaturase	[I]	Lipid transport and metabolism	Fatty acid desaturase;; Cytochrome b5-like Heme/Steroid binding domain	Delta(8)-fatty-acid desaturase OS=Helianthus annuus OX=4232 GN=sld1 PE=1 SV=1	I	Lipid transport and metabolism	PREDICTED: delta(8)-fatty-acid desaturase-like [Daucus carota subsp. sativus]
c45065.graph_c0	1023	832	1007	263	88	117	38.37	27.34	36.9	8.37	3.07	4.41	2.52877e-07	-2.42588	down	--	--	Molecular Function: transcription factor activity, sequence-specific DNA binding (GO:0003700);; Cellular Component: nucleus (GO:0005634);; Biological Process: regulation of transcription, DNA-templated (GO:0006355);; Molecular Function: sequence-specific DNA binding (GO:0043565);; Biological Process: leaf development (GO:0048366);; Biological Process: bundle sheath cell fate specification (GO:009…	--	--	--	GRAS domain family	Scarecrow-like protein 23 OS=Arabidopsis thaliana OX=3702 GN=SCL23 PE=1 SV=1	K	Transcription	PREDICTED: scarecrow-like protein 23 [Daucus carota subsp. sativus]
c52425.graph_c0	720	581	838	78	38	48	100.77	73.81	116.34	9.38	5.09	7.26	4.95339e-15	-3.43661	down	--	--	--	--	--	--	Helix-loop-helix DNA-binding domain	Transcription factor bHLH93 OS=Arabidopsis thaliana OX=3702 GN=BHLH93 PE=1 SV=1	K	Transcription	PREDICTED: transcription factor bHLH93-like [Daucus carota subsp. sativus]
c37181.graph_c0	811	2429	951	266	406	350	62.38	164.45	71.28	17.34	29.33	28.14	0.00962491	-1.65466	down	--	--	Molecular Function: RNA binding (GO:0003723);; Molecular Function: structural constituent of ribosome (GO:0003735);; Cellular Component: nucleus (GO:0005634);; Cellular Component: mitochondrial large ribosomal subunit (GO:0005762);; Biological Process: translation (GO:0006412);; Cellular Component: chloroplast stroma (GO:0009570);; Biological Process: chloroplast organization (GO:0009658);; Biolo…	K02888|4.98207e-42|cit:102624292|K02888 large subunit ribosomal protein L21 | (RefSeq) 50S ribosomal protein L21, chloroplastic	[J]	Translation, ribosomal structure and biogenesis	Ribosomal prokaryotic L21 protein	50S ribosomal protein L21, chloroplastic OS=Arabidopsis thaliana OX=3702 GN=RPL21 PE=2 SV=1	J	Translation, ribosomal structure and biogenesis	PREDICTED: 50S ribosomal protein L21, chloroplastic [Daucus carota subsp. sativus]
c22164.graph_c0	26	53	48	0	6	5	6.76	12.96	12.59	0	1.46	1.42	0.00443343	-2.71278	down	--	--	Molecular Function: calcium ion binding (GO:0005509);; Cellular Component: chloroplast (GO:0009507);; Cellular Component: photosystem II oxygen evolving complex (GO:0009654);; Biological Process: photosynthesis (GO:0015979);; Cellular Component: integral component of membrane (GO:0016021);; Cellular Component: extrinsic component of membrane (GO:0019898);;	K02717|1.54444e-24|sind:105167423|K02717 photosystem II oxygen-evolving enhancer protein 2 | (RefSeq) oxygen-evolving enhancer protein 2-1, chloroplastic-like	--	--	--	Oxygen-evolving enhancer protein 2-1, chloroplastic OS=Nicotiana tabacum OX=4097 GN=PSBP1 PE=3 SV=2	S	Function unknown	PREDICTED: oxygen-evolving enhancer protein 2-1, chloroplastic-like [Daucus carota subsp. sativus]
c28447.graph_c0	0	0	0	2	1	37	0	0	0	0.25	0.14	5.89	0.00765598	3.5225	up	--	--	Cellular Component: nucleus (GO:0005634);; Cellular Component: cytoplasm (GO:0005737);; Biological Process: protein import into nucleus (GO:0006606);; Molecular Function: protein transporter activity (GO:0008565);;	--	[U]	Intracellular trafficking, secretion, and vesicular transport	Armadillo/beta-catenin-like repeat;; HEAT repeat;; HEAT repeats;; HEAT-like repeat	Importin subunit alpha-1a OS=Oryza sativa subsp. japonica OX=39947 GN=Os01g0253300 PE=1 SV=2	U	Intracellular trafficking, secretion, and vesicular transport	PREDICTED: importin subunit alpha-1a-like isoform X1 [Daucus carota subsp. sativus]
c52644.graph_c0	42	67	61	2804	452	1964	2.11	5.45	2.06	92.7	19.33	120.62	5.99086e-17	4.69791	up	--	--	--	--	--	--	--	--	--	--	alpha tubulin [Populus tremuloides]
c38745.graph_c0	3	2	6	3	5	148	0.15	0.09	0.31	0.14	0.24	7.96	0.00750875	3.10052	up	--	--	Molecular Function: transporter activity (GO:0005215);; Biological Process: transport (GO:0006810);; Cellular Component: integral component of membrane (GO:0016021);;	K14638|1.10143e-135|vvi:100246000|K14638 solute carrier family 15 (peptide/histidine transporter), member 3/4 | (RefSeq) protein NRT1/ PTR FAMILY 4.5	[E]	Amino acid transport and metabolism	POT family	Protein NRT1/ PTR FAMILY 4.3 OS=Arabidopsis thaliana OX=3702 GN=NPF4.3 PE=2 SV=1	E	Amino acid transport and metabolism	PREDICTED: protein NRT1/ PTR FAMILY 4.5-like [Daucus carota subsp. sativus]
c36113.graph_c0	1535	2753	1286	7173	10987	11334	131.96	206.39	108.98	530.49	869.54	1023.47	5.23404e-07	2.54893	up	--	--	--	--	--	--	--	--	--	--	hypothetical protein DCAR_013577 [Daucus carota subsp. sativus]
c51083.graph_c0	1013	1150	1493	234	33	78	26.21	25.73	38.67	5.4	0.86	2.17	4.44233e-08	-3.16098	down	--	--	--	--	--	--	Domain of unknown function (DUF4378);; Protein of unknown function (DUF3741)	--	S	Function unknown	PREDICTED: uncharacterized protein LOC108192435 [Daucus carota subsp. sativus]
c46304.graph_c0	1057	968	1434	342	280	259	38.16	30.49	50.27	10.37	10.28	10.24	0.000137429	-1.74746	down	[O]	Posttranslational modification, protein turnover, chaperones	Molecular Function: ATP binding (GO:0005524);;	--	[D]	Cell cycle control, cell division, chromosome partitioning	NUBPL iron-transfer P-loop NTPase;; CobQ/CobB/MinD/ParA nucleotide binding domain;; AAA domain;; ATPase MipZ;; VirC1 protein;; Iron-sulfur cluster assembly protein;; Protein of unknown function (DUF971)	Fe-S cluster assembly factor HCF101, chloroplastic OS=Arabidopsis thaliana OX=3702 GN=HCF101 PE=1 SV=1	D	Cell cycle control, cell division, chromosome partitioning	PREDICTED: fe-S cluster assembly factor HCF101, chloroplastic [Daucus carota subsp. sativus]
c45529.graph_c0	214	788	37	24	3	31	9.63	28.88	2.18	0.77	0.11	2.24	0.000167535	-3.31785	down	--	--	--	--	--	--	Hydrophobic seed protein;; Protease inhibitor/seed storage/LTP family;; Probable lipid transfer	Putative lipid-binding protein At4g00165 OS=Arabidopsis thaliana OX=3702 GN=At4g00165 PE=2 SV=1	O	Posttranslational modification, protein turnover, chaperones	PREDICTED: putative lipid-binding protein At4g00165 [Daucus carota subsp. sativus]
c39190.graph_c0	411	1306	77	15	29	32	46.75	138.19	8.97	1.54	3.28	3.88	1.1102e-06	-3.71282	down	--	--	--	--	--	--	--	--	--	--	PREDICTED: thionin-like protein 2 [Daucus carota subsp. sativus]
c38521.graph_c3	85	19	30	171	97	297	11.11	2.23	3.86	18.79	11.91	41.14	0.00879226	2.07175	up	--	--	Molecular Function: oxidoreductase activity, acting on single donors with incorporation of molecular oxygen, incorporation of two atoms of oxygen (GO:0016702);; Biological Process: oxylipin biosynthetic process (GO:0031408);; Molecular Function: metal ion binding (GO:0046872);; Biological Process: oxidation-reduction process (GO:0055114);;	K00454|3.23693e-101|sind:105157809|K00454 lipoxygenase [EC:1.13.11.12] | (RefSeq) linoleate 13S-lipoxygenase 3-1, chloroplastic	--	--	Lipoxygenase	Linoleate 13S-lipoxygenase 3-1, chloroplastic OS=Solanum tuberosum OX=4113 GN=LOX3.1 PE=1 SV=1	S	Function unknown	hypothetical protein DCAR_007649 [Daucus carota subsp. sativus]
c37675.graph_c0	254	5	162	13	11	5	16.49	0.29	10.27	0.72	0.67	0.33	0.00098396	-3.1309	down	--	--	Molecular Function: DNA binding (GO:0003677);; Molecular Function: transcription factor activity, sequence-specific DNA binding (GO:0003700);; Cellular Component: nucleus (GO:0005634);; Biological Process: regulation of transcription, DNA-templated (GO:0006355);;	K14516|4.10643e-70|tcc:TCM_020871|K14516 ethylene-responsive transcription factor 1 | (RefSeq) Ethylene-responsive transcription factor 1B	--	--	AP2 domain	Ethylene-responsive transcription factor 1B OS=Arabidopsis thaliana OX=3702 GN=ERF1B PE=1 SV=2	K	Transcription	PREDICTED: ethylene-responsive transcription factor 1B-like [Daucus carota subsp. sativus]
c49417.graph_c0	1918	2590	1610	825	418	533	56.3	63.68	43.42	18.32	11.84	14.14	0.000430614	-1.57769	down	[HT]	Coenzyme transport and metabolism ;; Signal transduction mechanisms	Molecular Function: protein kinase activity (GO:0004672);; Molecular Function: ATP binding (GO:0005524);; Biological Process: protein phosphorylation (GO:0006468);; Cellular Component: integral component of membrane (GO:0016021);;	K08869|0|cit:102630269|K08869 aarF domain-containing kinase | (RefSeq) uncharacterized protein slr1919	[R]	General function prediction only	ABC1 family;; Phosphotransferase enzyme family	Protein ACTIVITY OF BC1 COMPLEX KINASE 3, chloroplastic OS=Arabidopsis thaliana OX=3702 GN=ABC1K3 PE=1 SV=1	S	Function unknown	PREDICTED: uncharacterized protein sll0005 [Daucus carota subsp. sativus]
c41992.graph_c0	272	869	244	86	31	28	12.76	36.22	10.53	3.3	1.31	1.37	1.69508e-06	-2.90995	down	--	--	--	--	--	--	--	--	S	Function unknown	PREDICTED: uncharacterized protein LOC108220204 [Daucus carota subsp. sativus]
c38894.graph_c0	1351	1839	1954	293	319	402	85.52	102.02	120.26	15.71	18.96	26.46	2.48467e-05	-2.02845	down	[S]	Function unknown	Molecular Function: acid phosphatase activity (GO:0003993);; Cellular Component: chloroplast thylakoid membrane (GO:0009535);; Biological Process: photosystem II repair (GO:0010206);; Cellular Component: integral component of membrane (GO:0016021);; Biological Process: dephosphorylation (GO:0016311);; Cellular Component: thylakoid lumen (GO:0031977);;	--	--	--	TPM domain	UPF0603 protein At1g54780, chloroplastic OS=Arabidopsis thaliana OX=3702 GN=At1g54780 PE=1 SV=1	S	Function unknown	PREDICTED: UPF0603 protein At1g54780, chloroplastic isoform X1 [Daucus carota subsp. sativus]
c17359.graph_c0	38	13	114	235	738	372	3.7	1.12	10.86	19.32	67.52	38.05	0.0002223	2.88504	up	--	--	--	--	--	--	F-box-like;; F-box domain	F-box protein SNE OS=Arabidopsis thaliana OX=3702 GN=SNE PE=1 SV=1	S	Function unknown	PREDICTED: F-box protein SNE [Daucus carota subsp. sativus]
c33633.graph_c0	572	123	302	21	18	17	42.26	8	21.73	1.31	1.25	1.31	3.0249e-09	-3.68039	down	--	--	Cellular Component: membrane (GO:0016020);;	--	--	--	Chlorophyll A-B binding protein	Stress enhanced protein 2, chloroplastic OS=Arabidopsis thaliana OX=3702 GN=SEP2 PE=2 SV=1	S	Function unknown	PREDICTED: stress enhanced protein 2, chloroplastic [Daucus carota subsp. sativus]
c39217.graph_c0	102	4	29	0	0	0	9.72	0.25	2.69	0	0	0	7.27863e-06	-4.88886	down	[J]	Translation, ribosomal structure and biogenesis	Molecular Function: translation elongation factor activity (GO:0003746);; Molecular Function: GTPase activity (GO:0003924);; Molecular Function: GTP binding (GO:0005525);; Cellular Component: cytoplasm (GO:0005737);; Biological Process: translational elongation (GO:0006414);;	K03231|0|ppp:PHYPADRAFT_76520|K03231 elongation factor 1-alpha | (RefSeq) hypothetical protein	[J]	Translation, ribosomal structure and biogenesis	Elongation factor Tu C-terminal domain;; Elongation factor Tu GTP binding domain;; Elongation factor Tu domain 2	Elongation factor 1-alpha OS=Manihot esculenta OX=3983 GN=EF1 PE=3 SV=1	J	Translation, ribosomal structure and biogenesis	Translation elongation factor EF-1 alpha/Tu [Klebsormidium nitens]
c43368.graph_c0	169	195	164	406	1144	360	13.65	13.95	12.25	30.33	97.99	34.6	0.00241445	1.97152	up	--	--	Cellular Component: integral component of membrane (GO:0016021);;	--	--	--	--	--	S	Function unknown	PREDICTED: uncharacterized protein LOC108194512 [Daucus carota subsp. sativus]
c47426.graph_c0	1327	1434	1265	509	450	417	43.07	40.22	39.69	14.09	13.7	13.99	0.00300457	-1.32152	down	[J]	Translation, ribosomal structure and biogenesis	Molecular Function: GTP binding (GO:0005525);; Cellular Component: chloroplast (GO:0009507);; Molecular Function: ribosome binding (GO:0043022);;	K03665|0|spen:107018011|K03665 GTPase | (RefSeq) GTPase HflX	[R]	General function prediction only	GTP-binding GTPase N-terminal;; GTP-binding GTPase Middle Region;; 50S ribosome-binding GTPase;; RsgA GTPase;; Ferrous iron transport protein B;; Dynamin family;; ADP-ribosylation factor family	GTP-binding protein At3g49725, chloroplastic OS=Arabidopsis thaliana OX=3702 GN=At3g49725 PE=2 SV=2	S	Function unknown	PREDICTED: GTPase HflX [Daucus carota subsp. sativus]
c47951.graph_c0	1561	1582	2466	7248	5650	8371	41.58	33.56	61.13	144.03	148.07	208.16	2.905e-05	2.02502	up	--	--	--	--	[T]	Signal transduction mechanisms	--	Plant UBX domain-containing protein 8 OS=Arabidopsis thaliana OX=3702 GN=PUX8 PE=1 SV=1	S	Function unknown	PREDICTED: plant UBX domain-containing protein 8-like isoform X2 [Daucus carota subsp. sativus]
c35313.graph_c0	740	835	1760	161	366	208	146.72	152.6	349.22	27.05	68.81	45.23	0.00653343	-1.8224	down	--	--	Cellular Component: chloroplast (GO:0009507);;	--	--	--	Thylakoid soluble phosphoprotein TSP9	--	S	Function unknown	PREDICTED: uncharacterized protein LOC108219921 [Daucus carota subsp. sativus]
c51792.graph_c0	455	341	514	1531	2134	3468	25.48	17.86	28.95	77.96	123.38	219.84	3.25591e-06	2.54761	up	--	--	--	--	--	--	--	--	S	Function unknown	PREDICTED: uncharacterized protein LOC108215589 [Daucus carota subsp. sativus]
c41486.graph_c0	5446	9972	13657	584	1761	1451	90.09	142.12	217.8	8.18	27.33	24.29	9.64459e-05	-2.46561	down	[I]	Lipid transport and metabolism	Molecular Function: phospholipase D activity (GO:0004630);; Molecular Function: calcium ion binding (GO:0005509);; Cellular Component: membrane (GO:0016020);; Biological Process: lipid catabolic process (GO:0016042);; Biological Process: phosphatidylcholine metabolic process (GO:0046470);; Molecular Function: N-acylphosphatidylethanolamine-specific phospholipase D activity (GO:0070290);;	K01115|0|cit:102622948|K01115 phospholipase D1/2 [EC:3.1.4.4] | (RefSeq) phospholipase D delta	[I]	Lipid transport and metabolism	Phospholipase D C terminal;; C2 domain;; Phospholipase D Active site motif;; PLD-like domain;; Copper binding proteins, plastocyanin/azurin family;; Cupredoxin-like domain	Phospholipase D delta OS=Arabidopsis thaliana OX=3702 GN=PLDDELTA PE=1 SV=2	I	Lipid transport and metabolism	PREDICTED: phospholipase D delta-like [Daucus carota subsp. sativus]
c48779.graph_c0	48	44	26	300	111	392	5.12	4.22	2.72	27.04	11.12	44.09	4.23034e-06	2.7662	up	--	--	--	--	--	--	--	--	--	--	PREDICTED: CSC1-like protein RXW8 isoform X2 [Daucus carota subsp. sativus]
c46530.graph_c0	54	98	65	429	170	214	2.15	3.21	2.37	14.79	6.4	8.94	0.000221444	1.93222	up	--	--	--	--	--	--	--	--	S	Function unknown	PREDICTED: uncharacterized protein LOC108223444 [Daucus carota subsp. sativus]
c36827.graph_c0	7797	11125	11633	21920	38057	18835	977.97	1251.63	1434.78	2313.26	4483.07	2500.76	0.00808948	1.51702	up	--	--	--	--	[DZ]	--	--	Translationally-controlled tumor protein homolog OS=Oryza sativa subsp. japonica OX=39947 GN=TCTP PE=1 SV=1	S	Function unknown	PREDICTED: translationally-controlled tumor protein homolog [Daucus carota subsp. sativus]
c40184.graph_c0	4553	2807	624	320	193	189	201.53	110.36	32.59	14.96	9.5	10.49	6.16925e-07	-3.0962	down	--	--	--	--	[R]	General function prediction only	Sulfotransferase domain;; Sulfotransferase family	Cytosolic sulfotransferase 13 OS=Arabidopsis thaliana OX=3702 GN=SOT13 PE=3 SV=1	S	Function unknown	PREDICTED: cytosolic sulfotransferase 13-like [Daucus carota subsp. sativus]
c50189.graph_c1	80	123	185	8	6	7	4.5	6.11	10.1	0.41	0.34	0.36	3.19698e-09	-3.70803	down	[R]	General function prediction only	Cellular Component: membrane (GO:0016020);;	--	[S]	Function unknown	Uncharacterized protein family UPF0016	Protein PAM71, chloroplastic OS=Arabidopsis thaliana OX=3702 GN=PAM71 PE=1 SV=2	S	Function unknown	PREDICTED: GDT1-like protein 1, chloroplastic [Daucus carota subsp. sativus]
c47064.graph_c0	5708	2339	2949	7628	11474	18019	142.02	50.84	73.05	202.89	315.58	575.1	0.00399054	1.88324	up	[IQ]	Lipid transport and metabolism ;; Secondary metabolites biosynthesis, transport and catabolism	Cellular Component: plasmodesma (GO:0009506);; Cellular Component: chloroplast stroma (GO:0009570);; Biological Process: response to cytokinin (GO:0009735);; Biological Process: positive regulation of seed germination (GO:0010030);; Biological Process: seed coat development (GO:0010214);; Biological Process: oxalate catabolic process (GO:0033611);; Cellular Component: apoplast (GO:0048046);; Mole…	--	[I]	Lipid transport and metabolism	AMP-binding enzyme;; AMP-binding enzyme C-terminal domain	Oxalate--CoA ligase OS=Arabidopsis thaliana OX=3702 GN=AAE3 PE=1 SV=1	IQ	--	PREDICTED: oxalate--CoA ligase-like [Daucus carota subsp. sativus]
c38275.graph_c0	422	238	289	562	7740	1300	38.95	19.46	26.07	43.8	670.92	125.88	6.6493e-05	3.19879	up	--	--	--	--	--	--	Dirigent-like protein	Dirigent protein 2 OS=Arabidopsis thaliana OX=3702 GN=DIR2 PE=2 SV=1	S	Function unknown	PREDICTED: dirigent protein 2-like [Daucus carota subsp. sativus]
c38717.graph_c0	85	272	191	22	41	26	8.06	22.86	17.79	1.76	3.65	2.59	0.00101823	-2.19432	down	--	--	--	--	--	--	--	--	S	Function unknown	PREDICTED: uncharacterized protein LOC108206838 [Daucus carota subsp. sativus]
c30997.graph_c0	12	11	7	39	37	81	0.9	0.73	0.51	2.48	2.61	6.36	0.00231218	2.37941	up	--	--	--	--	--	--	Trypsin and protease inhibitor	Miraculin OS=Synsepalum dulcificum OX=3743 PE=1 SV=3	O	Posttranslational modification, protein turnover, chaperones	PREDICTED: miraculin-like [Daucus carota subsp. sativus]
c38512.graph_c0	436	380	156	11	1	10	23.52	17.79	8.06	0.48	0.05	0.57	1.54801e-14	-4.82601	down	--	--	Biological Process: flavonoid biosynthetic process (GO:0009813);; Molecular Function: chalcone isomerase activity (GO:0045430);;	K01859|2.78065e-75|vvi:100233078|K01859 chalcone isomerase [EC:5.5.1.6] | (RefSeq) CHI, CHI1, CHI2; chalcone isomerase	--	--	Chalcone-flavanone isomerase	Chalcone--flavonone isomerase OS=Camellia sinensis OX=4442 GN=CHI PE=2 SV=2	G	Carbohydrate transport and metabolism	PREDICTED: chalcone--flavonone isomerase-like [Daucus carota subsp. sativus]
c50507.graph_c0	2257	3018	4712	10112	11368	10628	72.59	87.52	149.58	248.79	348.91	322.48	0.000565409	1.79994	up	--	--	Biological Process: lipid metabolic process (GO:0006629);; Molecular Function: hydrolase activity (GO:0016787);;	--	--	--	Lipase (class 3)	--	S	Function unknown	PREDICTED: uncharacterized protein LOC108214526 isoform X1 [Daucus carota subsp. sativus]
c41555.graph_c0	80	183	96	29	2	14	4.46	8.82	5.2	1.42	0.1	0.86	0.000513296	-2.61544	down	[Q]	Secondary metabolites biosynthesis, transport and catabolism	Molecular Function: oxidoreductase activity (GO:0016491);; Molecular Function: metal ion binding (GO:0046872);; Biological Process: oxidation-reduction process (GO:0055114);;	K04124|1.11166e-161|cic:CICLE_v10027153mg|K04124 gibberellin 3-beta-dioxygenase [EC:1.14.11.15] | (RefSeq) hypothetical protein	[QR]	--	2OG-Fe(II) oxygenase superfamily;; non-haem dioxygenase in morphine synthesis N-terminal	Gibberellin 3-beta-dioxygenase 1 OS=Pisum sativum OX=3888 GN=LE PE=1 SV=1	S	Function unknown	PREDICTED: gibberellin 3-beta-dioxygenase 2-like [Daucus carota subsp. sativus]
c38794.graph_c0	497	403	578	1056	1163	1250	37.02	26.96	40.16	56.46	72.75	91.45	0.00977598	1.37994	up	--	--	Molecular Function: GTP binding (GO:0005525);; Cellular Component: intracellular (GO:0005622);; Biological Process: small GTPase mediated signal transduction (GO:0007264);;	K07874|8.75436e-53|mdm:103421426|K07874 Ras-related protein Rab-1A | (RefSeq) ras-related protein RABD1-like	[TU]	--	Ras family	Ras-related protein RABD1 OS=Arabidopsis thaliana OX=3702 GN=RABD1 PE=1 SV=1	S	Function unknown	PREDICTED: ras-related protein RABD1 [Daucus carota subsp. sativus]
c42791.graph_c0	88	51	118	22	17	10	3.13	1.54	4.19	0.69	0.58	0.4	0.00291888	-2.09563	down	--	--	Molecular Function: structural constituent of ribosome (GO:0003735);; Biological Process: translation (GO:0006412);; Cellular Component: integral component of membrane (GO:0016021);; Biological Process: transmembrane transport (GO:0055085);;	K15109|8.41818e-114|gra:105776730|K15109 solute carrier family 25 (mitochondrial carnitine/acylcarnitine transporter), member 20/29 | (RefSeq) mitochondrial arginine transporter BAC2-like	[C]	Energy production and conversion	Mitochondrial carrier protein;; Mitochondrial carrier protein	Mitochondrial arginine transporter BAC2 OS=Arabidopsis thaliana OX=3702 GN=BAC2 PE=1 SV=1	S	Function unknown	PREDICTED: mitochondrial arginine transporter BAC2, partial [Daucus carota subsp. sativus]
c48881.graph_c0	909	548	749	57	40	65	34.34	17.42	25.83	1.7	1.36	2.43	3.52407e-13	-3.41839	down	[E]	Amino acid transport and metabolism	Molecular Function: transaminase activity (GO:0008483);; Molecular Function: 1-aminocyclopropane-1-carboxylate synthase activity (GO:0016847);; Molecular Function: pyridoxal phosphate binding (GO:0030170);; Biological Process: 1-aminocyclopropane-1-carboxylate biosynthetic process (GO:0042218);; Molecular Function: identical protein binding (GO:0042802);;	K20772|6.29179e-166|vvi:100263876|K20772 1-aminocyclopropane-1-carboxylate synthase 1/2/6 [EC:4.4.1.14] | (RefSeq) 1-aminocyclopropane-1-carboxylate synthase	[T]	Signal transduction mechanisms	Aminotransferase class I and II;; Aminotransferase class I and II	1-aminocyclopropane-1-carboxylate synthase OS=Glycine max OX=3847 GN=ACS1 PE=2 SV=1	E	Amino acid transport and metabolism	PREDICTED: 1-aminocyclopropane-1-carboxylate synthase-like [Daucus carota subsp. sativus]
c37900.graph_c0	316	161	173	99	19	32	23.67	12.51	12.77	5.26	1.48	2.12	0.00507277	-1.93364	down	--	--	Cellular Component: endoplasmic reticulum (GO:0005783);; Cellular Component: membrane part (GO:0044425);;	K13989|1.69308e-117|egr:104431358|K13989 Derlin-2/3 | (RefSeq) derlin-1.2-like	[S]	Function unknown	Der1-like family	Derlin-1.2 OS=Zea mays OX=4577 GN=DER1.2 PE=2 SV=1	S	Function unknown	PREDICTED: derlin-1-like [Daucus carota subsp. sativus]
c48240.graph_c1	410	1043	225	93	38	27	11.6	22.65	6.44	2.75	1.17	1.16	6.98542e-07	-3.04273	down	[T]	Signal transduction mechanisms	Molecular Function: monovalent cation:proton antiporter activity (GO:0005451);; Biological Process: cation transport (GO:0006812);; Biological Process: regulation of pH (GO:0006885);; Cellular Component: endomembrane system (GO:0012505);; Cellular Component: membrane (GO:0016020);; Biological Process: transmembrane transport (GO:0055085);;	--	[P]	Inorganic ion transport and metabolism	Universal stress protein family;; bZIP transcription factor;; Basic region leucine zipper	Cation/H(+) antiporter 19 OS=Arabidopsis thaliana OX=3702 GN=CHX19 PE=2 SV=1	P	Inorganic ion transport and metabolism	hypothetical protein DCAR_030414 [Daucus carota subsp. sativus]
c35815.graph_c1	357	429	167	18	60	44	54.64	45.78	29.13	2.58	6	5.61	0.000219977	-2.45298	down	--	--	--	K09286|1.1224e-50|sind:105157874|K09286 EREBP-like factor | (RefSeq) ethylene-responsive transcription factor RAP2-12-like	--	--	--	Ethylene-responsive transcription factor 1 OS=Oryza sativa subsp. japonica OX=39947 GN=EREBP1 PE=1 SV=1	K	Transcription	ethylene response factor [Apium graveolens]
c37582.graph_c1	81	4	9	2	0	0	1.38	0.06	0.15	0.03	0	0	0.00172015	-3.67264	down	[V]	Defense mechanisms	Molecular Function: ATP binding (GO:0005524);; Biological Process: drug transmembrane transport (GO:0006855);; Molecular Function: xenobiotic-transporting ATPase activity (GO:0008559);; Molecular Function: peptide-transporting ATPase activity (GO:0015440);; Biological Process: peptide transport (GO:0015833);; Cellular Component: integral component of membrane (GO:0016021);; Biological Process: xe…	--	[Q]	Secondary metabolites biosynthesis, transport and catabolism	ABC transporter transmembrane region;; ABC transporter;; ABC transporter transmembrane region;; ABC transporter;; ABC transporter transmembrane region;; ABC transporter transmembrane region	ABC transporter B family member 18 OS=Arabidopsis thaliana OX=3702 GN=ABCB18 PE=3 SV=1	V	Defense mechanisms	PREDICTED: ABC transporter B family member 13-like [Daucus carota subsp. sativus]
c43428.graph_c0	313	77	191	60	20	40	20.05	5.13	11.23	3.09	1.45	2.77	0.00583852	-2.00411	down	--	--	--	--	[I]	Lipid transport and metabolism	CRAL/TRIO domain	--	S	Function unknown	PREDICTED: sec14 cytosolic factor-like [Daucus carota subsp. sativus]
c34671.graph_c0	2045	1973	1761	6527	8903	10169	71.77	60.64	63.63	208.91	346.21	459.68	9.68796e-07	2.29515	up	--	--	Cellular Component: cell (GO:0005623);; Molecular Function: electron carrier activity (GO:0009055);; Molecular Function: protein disulfide oxidoreductase activity (GO:0015035);; Biological Process: cell redox homeostasis (GO:0045454);; Biological Process: oxidation-reduction process (GO:0055114);;	K03676|4.4404e-12|aly:ARALYDRAFT_916213|K03676 glutaredoxin 3 | (RefSeq) hypothetical protein	[O]	Posttranslational modification, protein turnover, chaperones	Glutaredoxin	Glutaredoxin-C2 OS=Arabidopsis thaliana OX=3702 GN=GRXC2 PE=3 SV=1	O	Posttranslational modification, protein turnover, chaperones	PREDICTED: glutaredoxin-like [Daucus carota subsp. sativus]
c43747.graph_c1	217	299	188	1272	941	1484	8.13	9.76	6.82	40.51	33.12	57.46	1.75122e-08	2.50955	up	--	--	Cellular Component: integral component of membrane (GO:0016021);;	--	--	--	Protein of unknown function (DUF616)	--	S	Function unknown	PREDICTED: uncharacterized protein LOC108205338 [Daucus carota subsp. sativus]
c48617.graph_c0	1331	1747	1626	4711	3177	3262	50.94	57.65	59.42	148.16	122.31	127.47	0.00142037	1.3665	up	[O]	Posttranslational modification, protein turnover, chaperones	Molecular Function: protein serine/threonine kinase activity (GO:0004674);; Molecular Function: ATP binding (GO:0005524);; Biological Process: protein phosphorylation (GO:0006468);; Cellular Component: integral component of membrane (GO:0016021);;	--	[T]	Signal transduction mechanisms	Protein tyrosine kinase;; Protein kinase domain;; Protein kinase domain;; Protein tyrosine kinase	Proline-rich receptor-like protein kinase PERK1 OS=Arabidopsis thaliana OX=3702 GN=PERK1 PE=1 SV=1	T	Signal transduction mechanisms	PREDICTED: proline-rich receptor-like protein kinase PERK1 isoform X2 [Daucus carota subsp. sativus]
c41784.graph_c0	88	41	94	120	520	580	4.36	1.43	4.54	4.84	23	25.7	0.000756707	2.48993	up	--	--	--	--	--	--	Thaumatin family	Thaumatin-like protein 1 OS=Castanea sativa OX=21020 GN=TL1 PE=2 SV=1	S	Function unknown	PREDICTED: thaumatin-like protein 1 [Daucus carota subsp. sativus]
c16256.graph_c0	0	0	0	13	23	16	0	0	0	1.36	2.69	2.11	0.00012973	4.35854	up	--	--	--	--	--	--	--	--	--	--	PREDICTED: uncharacterized protein LOC108212505 [Daucus carota subsp. sativus]
c50632.graph_c0	568	683	526	1976	1892	5178	12.44	12.75	11.31	35.79	37.77	113.32	2.32293e-05	2.4666	up	--	--	Cellular Component: integral component of membrane (GO:0016021);;	K20870|0|pxb:103932316|K20870 putative beta-1,4-xylosyltransferase IRX10 [EC:2.4.2.-] | (RefSeq) uncharacterized LOC103932316	[GMW]	--	Exostosin family;; EGF-like domain	Probable glucuronosyltransferase Os03g0107900 OS=Oryza sativa subsp. japonica OX=39947 GN=Os03g0107900 PE=2 SV=1	S	Function unknown	PREDICTED: uncharacterized protein LOC108219609 [Daucus carota subsp. sativus]
c42782.graph_c0	91	62	133	415	290	227	4	2.48	5.57	15.66	11.86	10.37	0.00183881	1.7359	up	--	--	--	--	--	--	--	--	--	--	PREDICTED: uncharacterized protein LOC108203691 [Daucus carota subsp. sativus]
c33047.graph_c0	0	2	2	10	49	30	0	0.19	0.21	0.88	4.83	3.31	0.000224845	3.69859	up	--	--	--	--	--	--	Reverse transcriptase-like	--	S	Function unknown	PREDICTED: uncharacterized protein LOC108221728 [Daucus carota subsp. sativus]
c44820.graph_c0	12942	1056	2358	654	585	568	662.38	47.58	116.65	28.8	28.18	30.21	0.000581094	-2.69247	down	[GM]	Carbohydrate transport and metabolism ;; Cell wall/membrane/envelope biogenesis	Biological Process: carbohydrate metabolic process (GO:0005975);; Molecular Function: arabinose-5-phosphate isomerase activity (GO:0019146);; Molecular Function: carbohydrate binding (GO:0030246);;	K06041|0|pop:POPTR_0005s24740g|K06041 arabinose-5-phosphate isomerase [EC:5.3.1.13] | (RefSeq) POPTRDRAFT_715189; sugar isomerase domain-containing family protein	--	--	SIS domain;; CBS domain;; SIS domain	Probable arabinose 5-phosphate isomerase OS=Arabidopsis thaliana OX=3702 GN=SETH3 PE=2 SV=1	M	Cell wall/membrane/envelope biogenesis	PREDICTED: probable arabinose 5-phosphate isomerase [Daucus carota subsp. sativus]
c43197.graph_c1	433	385	334	1291	846	781	29.19	23.55	22	75.59	55.46	58.93	0.000997061	1.4438	up	--	--	--	--	--	--	--	--	S	Function unknown	PREDICTED: uncharacterized protein LOC108215319 isoform X1 [Daucus carota subsp. sativus]
c17025.graph_c0	212	168	246	87	10	6	19.3	13.54	21.88	6.69	0.85	0.57	0.00338507	-2.39309	down	--	--	--	--	--	--	Peptidase of plants and bacteria	Basic secretory protease (Fragments) OS=Boswellia serrata OX=613112 PE=1 SV=1	S	Function unknown	PREDICTED: uncharacterized protein LOC108225790 [Daucus carota subsp. sativus]
c29850.graph_c1	91	33	2	1	0	1	4.85	1.54	0.1	0.05	0	0.06	0.000253926	-4.00029	down	[QV]	Secondary metabolites biosynthesis, transport and catabolism ;; Defense mechanisms	--	--	[QI]	--	Cytochrome P450	Alkane hydroxylase MAH1 OS=Arabidopsis thaliana OX=3702 GN=CYP96A15 PE=2 SV=1	Q	Secondary metabolites biosynthesis, transport and catabolism	PREDICTED: alkane hydroxylase MAH1-like [Daucus carota subsp. sativus]
c18295.graph_c0	16	43	4	2	0	0	1.25	2.52	0.21	0.1	0	0	0.00697003	-3.27779	down	[L]	Replication, recombination and repair	--	--	[R]	General function prediction only	Reverse transcriptase-like	Putative ribonuclease H protein At1g65750 OS=Arabidopsis thaliana OX=3702 GN=At1g65750 PE=3 SV=1	S	Function unknown	putative ribonuclease h protein [Nicotiana attenuata]
c38129.graph_c0	74	55	53	469	221	359	7.86	5.37	5.18	41.37	22.15	40.4	6.83728e-08	2.55668	up	--	--	--	--	[A]	RNA processing and modification	--	Nuclear poly(A) polymerase 4 OS=Arabidopsis thaliana OX=3702 GN=PAPS4 PE=1 SV=1	--	--	Nucleotidyltransferase, class I, C-terminal-like protein, partial [Cynara cardunculus var. scolymus]
c28179.graph_c0	0	0	0	1	13	21	0	0	0	0.07	1.06	1.91	0.005406	3.60229	up	--	--	--	--	--	--	--	--	--	--	PREDICTED: glutamate receptor 2.9-like [Daucus carota subsp. sativus]
c42864.graph_c0	1266	4192	1272	460	380	428	48.99	140.7	47.61	15.15	13.81	17.03	0.000478717	-2.04531	down	[G]	Carbohydrate transport and metabolism	Molecular Function: polygalacturonase activity (GO:0004650);; Cellular Component: extracellular region (GO:0005576);; Biological Process: carbohydrate metabolic process (GO:0005975);; Cellular Component: integral component of membrane (GO:0016021);; Biological Process: cell wall organization (GO:0071555);;	--	--	--	Glycosyl hydrolases family 28;; Pectate lyase superfamily protein	Probable polygalacturonase OS=Vitis vinifera OX=29760 GN=GSVIVT00026920001 PE=1 SV=1	M	Cell wall/membrane/envelope biogenesis	PREDICTED: probable polygalacturonase [Daucus carota subsp. sativus]
c48198.graph_c0	536	605	336	160	112	145	12.07	11.75	7.3	3.06	2.39	3.36	0.00181067	-1.56584	down	[T]	Signal transduction mechanisms	--	--	[S]	Function unknown	Armadillo/beta-catenin-like repeat;; U-box domain;; Kinesin-associated protein (KAP)	U-box domain-containing protein 3 OS=Arabidopsis thaliana OX=3702 GN=PUB3 PE=2 SV=2	U	Intracellular trafficking, secretion, and vesicular transport	PREDICTED: U-box domain-containing protein 3 [Daucus carota subsp. sativus]
c52240.graph_c0	196	260	200	508	434	1362	5.92	6.96	6.07	13.36	12.81	43.49	0.00293674	1.95402	up	--	--	--	--	--	--	--	AT-rich interactive domain-containing protein 2 OS=Arabidopsis thaliana OX=3702 GN=ARID2 PE=1 SV=1	S	Function unknown	PREDICTED: uncharacterized protein LOC108205624 [Daucus carota subsp. sativus]
c47267.graph_c0	338	281	297	1399	1452	774	17.49	13.04	15.12	59.17	66.6	37.79	5.31361e-06	2.06963	up	--	--	Cellular Component: membrane (GO:0016020);; Biological Process: metal ion transport (GO:0030001);; Molecular Function: metal ion transmembrane transporter activity (GO:0046873);; Biological Process: transmembrane transport (GO:0055085);;	K14709|2.29074e-145|cit:102615205|K14709 solute carrier family 39 (zinc transporter), member 1/2/3 | (RefSeq) zinc transporter 1-like	[P]	Inorganic ion transport and metabolism	ZIP Zinc transporter;; ZIP Zinc transporter	Zinc transporter 1 OS=Arabidopsis thaliana OX=3702 GN=ZIP1 PE=2 SV=1	P	Inorganic ion transport and metabolism	PREDICTED: zinc transporter 1-like [Daucus carota subsp. sativus]
c41504.graph_c0	1140	3351	1693	256	244	345	61.95	159.3	89.96	11.75	12.62	19.27	3.18424e-06	-2.47842	down	[H]	Coenzyme transport and metabolism	Cellular Component: chloroplast (GO:0009507);; Biological Process: chlorophyll biosynthetic process (GO:0015995);; Biological Process: methylation (GO:0032259);; Molecular Function: magnesium protoporphyrin IX methyltransferase activity (GO:0046406);;	K03428|1.36237e-164|sot:102580238|K03428 magnesium-protoporphyrin O-methyltransferase [EC:2.1.1.11] | (RefSeq) magnesium protoporphyrin IX methyltransferase, chloroplastic	[H]	Coenzyme transport and metabolism	Magnesium-protoporphyrin IX methyltransferase C-terminus;; Methyltransferase domain;; Methyltransferase domain;; Methyltransferase domain;; Methyltransferase domain;; Methyltransferase domain	Magnesium protoporphyrin IX methyltransferase, chloroplastic OS=Arabidopsis thaliana OX=3702 GN=CHLM PE=1 SV=1	H	Coenzyme transport and metabolism	PREDICTED: magnesium protoporphyrin IX methyltransferase, chloroplastic [Daucus carota subsp. sativus]
c45474.graph_c0	1768	4847	2016	388	306	526	67.24	160.07	74.2	12.53	10.92	20.64	7.50161e-06	-2.42862	down	[R]	General function prediction only	Biological Process: plasma membrane pyruvate transport (GO:0006849);; Cellular Component: chloroplast thylakoid (GO:0009534);; Cellular Component: chloroplast envelope (GO:0009941);; Cellular Component: integral component of membrane (GO:0016021);; Molecular Function: pyruvate transmembrane transporter activity (GO:0050833);;	K03453|0|jcu:105639293|K03453 bile acid:Na+ symporter, BASS family | (RefSeq) sodium/pyruvate cotransporter BASS2, chloroplastic	[P]	Inorganic ion transport and metabolism	Sodium Bile acid symporter family;; SBF-like CPA transporter family (DUF4137)	Sodium/pyruvate cotransporter BASS2, chloroplastic OS=Arabidopsis thaliana OX=3702 GN=BASS2 PE=1 SV=1	S	Function unknown	PREDICTED: sodium/pyruvate cotransporter BASS2, chloroplastic-like [Daucus carota subsp. sativus]
c30394.graph_c0	540	60	31	20	30	6	67.05	6.68	3.78	2.09	3.5	0.79	0.00338507	-2.80541	down	--	--	Molecular Function: peroxidase activity (GO:0004601);; Cellular Component: extracellular region (GO:0005576);; Biological Process: response to oxidative stress (GO:0006979);; Cellular Component: plant-type cell wall (GO:0009505);; Biological Process: plant-type cell wall organization (GO:0009664);; Molecular Function: heme binding (GO:0020037);; Biological Process: hydrogen peroxide catabolic pro…	K00430|2.92571e-79|rcu:8283183|K00430 peroxidase [EC:1.11.1.7] | (RefSeq) peroxidase 12	--	--	Peroxidase	Peroxidase 12 OS=Arabidopsis thaliana OX=3702 GN=PER12 PE=1 SV=1	G	Carbohydrate transport and metabolism	PREDICTED: peroxidase 12-like [Daucus carota subsp. sativus]
c52447.graph_c0	497	643	531	1880	1143	4503	7.67	8.79	9.18	28.35	19.53	70.15	0.000288943	2.27376	up	--	--	Molecular Function: zinc ion binding (GO:0008270);;	K16276|0|vvi:100255880|K16276 zinc finger protein-like protein | (RefSeq) zinc finger protein BRUTUS	[R]	General function prediction only	Hemerythrin HHE cation binding domain;; CHY zinc finger;; Ring finger domain	Zinc finger protein BRUTUS OS=Arabidopsis thaliana OX=3702 GN=BTS PE=1 SV=1	S	Function unknown	PREDICTED: uncharacterized protein LOC108209282 isoform X1 [Daucus carota subsp. sativus]
c42247.graph_c0	560	1015	1677	40	90	108	26.14	41.27	75.86	1.58	3.94	5.22	1.188e-07	-3.24028	down	--	--	Cellular Component: membrane (GO:0016020);;	--	--	--	CAAD domains of cyanobacterial aminoacyl-tRNA synthetase	Protein CURVATURE THYLAKOID 1B, chloroplastic OS=Arabidopsis thaliana OX=3702 GN=CURT1B PE=1 SV=2	S	Function unknown	PREDICTED: protein CURVATURE THYLAKOID 1B, chloroplastic [Daucus carota subsp. sativus]
c24439.graph_c0	63	28	73	5	2	9	7.36	2.88	8.41	0.5	0.22	1.13	0.00098396	-2.7767	down	[T]	Signal transduction mechanisms	Molecular Function: protein serine/threonine kinase activity (GO:0004674);; Molecular Function: ATP binding (GO:0005524);; Biological Process: protein phosphorylation (GO:0006468);; Molecular Function: carbohydrate binding (GO:0030246);;	--	[T]	Signal transduction mechanisms	Protein kinase domain;; Protein tyrosine kinase	Probable receptor-like serine/threonine-protein kinase At5g57670 OS=Arabidopsis thaliana OX=3702 GN=At5g57670 PE=2 SV=1	T	Signal transduction mechanisms	PREDICTED: probable receptor-like serine/threonine-protein kinase At5g57670 [Daucus carota subsp. sativus]
c47324.graph_c0	525	657	641	1356	1851	1294	15.26	16.38	17.15	33.17	48.52	37.49	0.00381245	1.46381	up	[O]	Posttranslational modification, protein turnover, chaperones	Molecular Function: cysteine-type endopeptidase activity (GO:0004197);; Cellular Component: extracellular space (GO:0005615);; Cellular Component: lysosome (GO:0005764);; Biological Process: proteolysis involved in cellular protein catabolic process (GO:0051603);;	K16290|0|cam:101500447|K16290 xylem cysteine proteinase [EC:3.4.22.-] | (RefSeq) xylem cysteine proteinase 2	[O]	Posttranslational modification, protein turnover, chaperones	Papain family cysteine protease;; Cathepsin propeptide inhibitor domain (I29);; Peptidase C1-like family;; Hsp20/alpha crystallin family	Cysteine protease XCP2 OS=Arabidopsis thaliana OX=3702 GN=XCP2 PE=1 SV=2	O	Posttranslational modification, protein turnover, chaperones	PREDICTED: cysteine protease XCP2-like [Daucus carota subsp. sativus]
c45721.graph_c0	660	729	469	1545	1665	1899	29.73	26.96	28.39	76.17	111.88	121.19	0.00080078	1.6285	up	--	--	Molecular Function: zinc ion binding (GO:0008270);;	--	[R]	General function prediction only	PHD-finger	PHD finger protein At1g33420 OS=Arabidopsis thaliana OX=3702 GN=At1g33420 PE=1 SV=1	S	Function unknown	PREDICTED: PHD finger protein At1g33420 isoform X3 [Daucus carota subsp. sativus]
c48949.graph_c0	281	567	220	1486	1659	2904	8.64	14.52	6.45	36.97	44.21	87.94	2.27259e-06	2.62733	up	[G]	Carbohydrate transport and metabolism	Biological Process: cellular glucose homeostasis (GO:0001678);; Molecular Function: hexokinase activity (GO:0004396);; Molecular Function: ATP binding (GO:0005524);; Molecular Function: glucose binding (GO:0005536);; Cellular Component: cell (GO:0005623);; Biological Process: glycolytic process (GO:0006096);; Cellular Component: integral component of membrane (GO:0016021);; Biological Process: ca…	K00844|0|cic:CICLE_v10014962mg|K00844 hexokinase [EC:2.7.1.1] | (RefSeq) hypothetical protein	[G]	Carbohydrate transport and metabolism	Hexokinase;; Hexokinase;; Hexokinase;; Hexokinase	Hexokinase-3 OS=Arabidopsis thaliana OX=3702 GN=At1g50460 PE=1 SV=1	G	Carbohydrate transport and metabolism	PREDICTED: hexokinase-3 [Daucus carota subsp. sativus]
c38734.graph_c1	185	368	93	11	10	23	30.6	55.44	15.24	1.52	1.55	4.07	5.3008e-07	-3.28428	down	--	--	Molecular Function: pectate lyase activity (GO:0030570);; Biological Process: pectin catabolic process (GO:0045490);; Molecular Function: metal ion binding (GO:0046872);;	K01728|1.8474e-63|mdm:103452061|K01728 pectate lyase [EC:4.2.2.2] | (RefSeq) probable pectate lyase 5	--	--	--	Putative pectate lyase 11 OS=Arabidopsis thaliana OX=3702 GN=At3g27400 PE=3 SV=2	G	Carbohydrate transport and metabolism	PREDICTED: probable pectate lyase 5 [Daucus carota subsp. sativus]
c36089.graph_c0	1	2	9	47	12	85	0.17	0.3	1.49	6.57	1.88	15.18	0.00124586	3.10984	up	--	--	--	--	[T]	Signal transduction mechanisms	NB-ARC domain	Probable disease resistance protein At4g14610 OS=Arabidopsis thaliana OX=3702 GN=At4g14610 PE=3 SV=1	S	Function unknown	hypothetical protein DCAR_006206 [Daucus carota subsp. sativus]
c40382.graph_c0	59	82	17	3	3	2	3.68	4.48	1.02	0.16	0.17	0.19	5.25602e-05	-3.47131	down	--	--	--	--	--	--	--	Cyclin-dependent protein kinase inhibitor SMR6 OS=Arabidopsis thaliana OX=3702 GN=SMR6 PE=1 SV=1	S	Function unknown	PREDICTED: uncharacterized protein LOC108225537 [Daucus carota subsp. sativus]
c36616.graph_c0	109	211	256	3	2	10	10.98	18.52	24.72	0.25	0.19	0.99	1.59382e-11	-4.51336	down	[C]	Energy production and conversion	Molecular Function: electron carrier activity (GO:0009055);; Cellular Component: chloroplast thylakoid membrane (GO:0009535);; Biological Process: photosynthetic electron transport in photosystem I (GO:0009773);; Cellular Component: NAD(P)H dehydrogenase complex (plastoquinone) (GO:0010598);; Molecular Function: metal ion binding (GO:0046872);; Molecular Function: iron-sulfur cluster binding (GO:…	--	--	--	2Fe-2S iron-sulfur cluster binding domain	Photosynthetic NDH subunit of subcomplex B 3, chloroplastic OS=Arabidopsis thaliana OX=3702 GN=PNSB3 PE=2 SV=1	C	Energy production and conversion	hypothetical protein DCAR_016201 [Daucus carota subsp. sativus]
c33189.graph_c0	653	1943	1010	155	276	318	62.83	165.73	95.06	12.61	25.01	32.18	0.00439561	-1.84351	down	[J]	Translation, ribosomal structure and biogenesis	Molecular Function: structural constituent of ribosome (GO:0003735);; Biological Process: translation (GO:0006412);; Cellular Component: chloroplast (GO:0009507);; Cellular Component: large ribosomal subunit (GO:0015934);; Molecular Function: rRNA binding (GO:0019843);;	K02879|2.11384e-92|sly:101267247|K02879 large subunit ribosomal protein L17 | (RefSeq) 50S ribosomal protein L17, chloroplastic	[J]	Translation, ribosomal structure and biogenesis	Ribosomal protein L17	50S ribosomal protein L17, chloroplastic OS=Nicotiana tabacum OX=4097 GN=RPL17 PE=2 SV=1	J	Translation, ribosomal structure and biogenesis	PREDICTED: 50S ribosomal protein L17 [Daucus carota subsp. sativus]
c43214.graph_c0	846	490	604	1157	2920	2129	44.39	22.86	30.32	51.86	147.41	117.58	0.00358547	1.82383	up	--	--	Cellular Component: cytoplasm (GO:0005737);; Biological Process: lipid metabolic process (GO:0006629);; Cellular Component: integral component of membrane (GO:0016021);; Molecular Function: oxidoreductase activity, acting on the CH-CH group of donors (GO:0016627);; Biological Process: oxidation-reduction process (GO:0055114);;	K10258|1.34964e-59|vra:106763737|K10258 very-long-chain enoyl-CoA reductase [EC:1.3.1.93] | (RefSeq) very-long-chain enoyl-CoA reductase-like	[I]	Lipid transport and metabolism	--	Steroid 5-alpha-reductase DET2 OS=Gossypium hirsutum OX=3635 GN=DET2 PE=1 SV=1	S	Function unknown	PREDICTED: steroid 5-alpha-reductase DET2-like [Daucus carota subsp. sativus]
c47618.graph_c0	253	284	278	114	70	84	8.89	8.76	9.41	3.37	2.3	3.01	0.00555353	-1.3932	down	--	--	Cellular Component: chloroplast thylakoid membrane (GO:0009535);; Cellular Component: integral component of membrane (GO:0016021);;	--	[R]	General function prediction only	--	Rhodanese-like domain-containing protein 4A, chloroplastic OS=Arabidopsis thaliana OX=3702 GN=STR4A PE=2 SV=1	S	Function unknown	PREDICTED: rhodanese-like domain-containing protein 4A, chloroplastic [Daucus carota subsp. sativus]
c42091.graph_c0	111	32	2	3	0	0	6.77	1.71	0.12	0.16	0	0	0.000426148	-3.90513	down	--	--	--	--	--	--	Pollen proteins Ole e I like	--	S	Function unknown	PREDICTED: uncharacterized protein LOC108196632 [Daucus carota subsp. sativus]
c32471.graph_c0	419	10	150	8	3	7	15.51	0.32	5.37	0.25	0.1	0.27	4.37126e-06	-4.05046	down	[G]	Carbohydrate transport and metabolism	Molecular Function: sugar:proton symporter activity (GO:0005351);; Molecular Function: glucose transmembrane transporter activity (GO:0005355);; Cellular Component: integral component of plasma membrane (GO:0005887);; Biological Process: proton transport (GO:0015992);; Molecular Function: 2-alkenal reductase [NAD(P)] activity (GO:0032440);; Biological Process: glucose import (GO:0046323);; Biolog…	--	[R]	General function prediction only	Sugar (and other) transporter;; Major Facilitator Superfamily	Polyol transporter 5 OS=Arabidopsis thaliana OX=3702 GN=PLT5 PE=1 SV=2	G	Carbohydrate transport and metabolism	mannitol transporter [Apium graveolens Dulce Group]
c29381.graph_c1	35	8	24	3	1	0	8.28	1.77	5.7	0.59	0.22	0	0.00724872	-3.03369	down	--	--	--	--	--	--	--	--	--	--	PREDICTED: cyclin-dependent protein kinase inhibitor SMR2 [Daucus carota subsp. sativus]
c48091.graph_c0	435	219	255	74	30	20	18.34	8.02	10.36	2.67	1.19	0.87	3.36574e-06	-2.64164	down	[M]	Cell wall/membrane/envelope biogenesis	Biological Process: polysaccharide biosynthetic process (GO:0000271);; Cellular Component: Golgi apparatus (GO:0005794);; Molecular Function: transferase activity, transferring glycosyl groups (GO:0016757);;	K20893|0|vvi:100240984|K20893 probable galacturonosyltransferase-like 1 [EC:2.4.1.-] | (RefSeq) probable galacturonosyltransferase-like 1	--	--	Glycosyl transferase family 8	Probable galacturonosyltransferase-like 2 OS=Arabidopsis thaliana OX=3702 GN=GATL2 PE=2 SV=1	O	Posttranslational modification, protein turnover, chaperones	PREDICTED: probable galacturonosyltransferase-like 1 [Daucus carota subsp. sativus]
c48211.graph_c0	3	5	4	100	54	100	0.07	0.12	0.09	2.08	1.23	2.5	7.26572e-10	4.12902	up	--	--	--	--	[R]	General function prediction only	--	--	--	--	PREDICTED: uncharacterized protein LOC109234647 [Nicotiana attenuata]
c40879.graph_c0	1328	1227	1210	3604	2813	4936	60.8	48.9	53.71	139.98	120.87	233.78	0.000442648	1.73663	up	--	--	Cellular Component: membrane (GO:0016020);;	--	[T]	Signal transduction mechanisms	Protein of unknown function (DUF568)	Cytochrome b561 and DOMON domain-containing protein At3g25290 OS=Arabidopsis thaliana OX=3702 GN=At3g25290 PE=2 SV=1	S	Function unknown	PREDICTED: cytochrome b561 and DOMON domain-containing protein At4g12980 [Daucus carota subsp. sativus]
c51842.graph_c0	425	525	626	2932	2508	4170	11.74	12.76	17.01	75.69	72.01	122.01	6.8463e-09	2.70503	up	[J]	Translation, ribosomal structure and biogenesis	Molecular Function: nucleic acid binding (GO:0003676);;	K14787|0|vvi:100247562|K14787 multiple RNA-binding domain-containing protein 1 | (RefSeq) multiple RNA-binding domain-containing protein 1	[R]	General function prediction only	RNA recognition motif. (a.k.a. RRM, RBD, or RNP domain);; RNA recognition motif. (a.k.a. RRM, RBD, or RNP domain)	Polyadenylate-binding protein 2 OS=Arabidopsis thaliana OX=3702 GN=PAB2 PE=1 SV=1	S	Function unknown	PREDICTED: multiple RNA-binding domain-containing protein 1 isoform X1 [Daucus carota subsp. sativus]
c36694.graph_c1	30	60	59	0	0	0	2.61	4.62	5.02	0	0	0	3.87784e-08	-5.4529	down	--	--	--	--	--	--	--	Protein BIC1 OS=Arabidopsis thaliana OX=3702 GN=BIC1 PE=1 SV=1	S	Function unknown	PREDICTED: uncharacterized protein LOC108227482 [Daucus carota subsp. sativus]
c51205.graph_c0	978	930	840	2784	1557	5698	26.53	21.12	22.28	64.56	38.21	153.55	0.00146371	1.98418	up	--	--	Biological Process: vesicle docking involved in exocytosis (GO:0006904);;	K15292|0|sind:105155625|K15292 syntaxin-binding protein 1 | (RefSeq) SNARE-interacting protein KEULE-like	[U]	Intracellular trafficking, secretion, and vesicular transport	Sec1 family	SNARE-interacting protein KEULE OS=Arabidopsis thaliana OX=3702 GN=KEU PE=1 SV=2	U	Intracellular trafficking, secretion, and vesicular transport	PREDICTED: SNARE-interacting protein KEULE isoform X1 [Daucus carota subsp. sativus]
c36955.graph_c0	196	210	177	60	28	35	7.68	7.11	6.72	1.98	1.02	1.41	6.1135e-05	-2.01738	down	[G]	Carbohydrate transport and metabolism	Molecular Function: ribokinase activity (GO:0004747);; Biological Process: D-ribose metabolic process (GO:0006014);; Cellular Component: chloroplast stroma (GO:0009570);; Biological Process: carbohydrate phosphorylation (GO:0046835);;	K00847|0|sly:543890|K00847 fructokinase [EC:2.7.1.4] | (RefSeq) SlFRK3; fructokinase 3	[G]	Carbohydrate transport and metabolism	pfkB family carbohydrate kinase	Probable fructokinase-6, chloroplastic OS=Arabidopsis thaliana OX=3702 GN=At1g66430 PE=2 SV=1	G	Carbohydrate transport and metabolism	PREDICTED: probable fructokinase-6, chloroplastic [Nicotiana tomentosiformis]
c37458.graph_c0	344	1115	294	5170	11668	9823	27.41	73.47	22.71	344.2	828.26	768.98	2.81389e-11	3.93507	up	--	--	Cellular Component: extracellular region (GO:0005576);; Cellular Component: plant-type cell wall (GO:0009505);; Cellular Component: plasmodesma (GO:0009506);; Cellular Component: membrane (GO:0016020);; Biological Process: sexual reproduction (GO:0019953);;	--	--	--	Lytic transglycolase	Expansin-like A1 OS=Arabidopsis thaliana OX=3702 GN=EXLA1 PE=2 SV=1	G	Carbohydrate transport and metabolism	PREDICTED: expansin-like A2 [Daucus carota subsp. sativus]
c41796.graph_c0	2423	1278	2741	6653	5766	7633	106.54	47.23	109.86	232.8	244.4	340.2	0.00157805	1.7345	up	--	--	Biological Process: amino acid transmembrane transport (GO:0003333);; Molecular Function: amino acid transmembrane transporter activity (GO:0015171);; Cellular Component: integral component of membrane (GO:0016021);;	K14207|8.97754e-95|sind:105156458|K14207 solute carrier family 38 (sodium-coupled neutral amino acid transporter), member 2 | (RefSeq) probable sodium-coupled neutral amino acid transporter 6	[E]	Amino acid transport and metabolism	Transmembrane amino acid transporter protein;; Tryptophan/tyrosine permease family;; Transmembrane amino acid transporter protein	Amino acid transporter AVT6A OS=Arabidopsis thaliana OX=3702 GN=AVT6A PE=2 SV=1	E	Amino acid transport and metabolism	PREDICTED: probable sodium-coupled neutral amino acid transporter 6 [Daucus carota subsp. sativus]
c47925.graph_c0	139	114	140	42	19	38	3.91	2.77	3.8	1	0.5	1.1	0.00464466	-1.73191	down	--	;;	Molecular Function: protein serine/threonine kinase activity (GO:0004674);; Molecular Function: ATP binding (GO:0005524);; Cellular Component: plasma membrane (GO:0005886);; Biological Process: protein phosphorylation (GO:0006468);; Cellular Component: integral component of membrane (GO:0016021);; Molecular Function: carbohydrate binding (GO:0030246);;	--	--	--	Legume lectin domain;; Protein kinase domain;; Protein tyrosine kinase	L-type lectin-domain containing receptor kinase S.4 OS=Arabidopsis thaliana OX=3702 GN=LECRKS4 PE=2 SV=1	T	Signal transduction mechanisms	PREDICTED: L-type lectin-domain containing receptor kinase S.4-like [Daucus carota subsp. sativus]
c46607.graph_c0	912	2114	971	201	277	314	34.95	69.89	36	6.46	10.01	12.41	0.000575599	-1.95019	down	[O]	Posttranslational modification, protein turnover, chaperones	Biological Process: protein peptidyl-prolyl isomerization (GO:0000413);; Molecular Function: peptidyl-prolyl cis-trans isomerase activity (GO:0003755);; Biological Process: protein folding (GO:0006457);;	--	--	--	Cyclophilin type peptidyl-prolyl cis-trans isomerase/CLD	Peptidyl-prolyl cis-trans isomerase, chloroplastic OS=Spinacia oleracea OX=3562 GN=TLP40 PE=1 SV=1	O	Posttranslational modification, protein turnover, chaperones	PREDICTED: peptidyl-prolyl cis-trans isomerase CYP38, chloroplastic [Daucus carota subsp. sativus]
c53183.graph_c0	318	210	294	60	20	30	12.43	7.11	11.1	1.99	0.73	1.21	3.66954e-07	-2.66237	down	[P]	Inorganic ion transport and metabolism	Molecular Function: molybdate ion transmembrane transporter activity (GO:0015098);; Biological Process: molybdate ion transport (GO:0015689);; Cellular Component: integral component of membrane (GO:0016021);;	--	--	--	Molybdate transporter of MFS superfamily	Molybdate transporter 2 OS=Arabidopsis thaliana OX=3702 GN=MOT2 PE=1 SV=2	P	Inorganic ion transport and metabolism	PREDICTED: molybdate transporter 2 [Daucus carota subsp. sativus]
c33205.graph_c0	8	12	11	64	19	70	0.85	1.14	1.15	5.76	1.91	7.87	0.00638507	2.22137	up	--	--	--	--	--	--	MAC/Perforin domain	MACPF domain-containing protein At1g14780 OS=Arabidopsis thaliana OX=3702 GN=At1g14780 PE=2 SV=1	S	Function unknown	hypothetical protein DCAR_002674 [Daucus carota subsp. sativus]
c51281.graph_c0	212	514	265	68	30	54	5.8	13.21	6.88	1.58	0.87	1.47	1.13728e-05	-2.38836	down	[M]	Cell wall/membrane/envelope biogenesis	Molecular Function: single-stranded RNA binding (GO:0003727);; Cellular Component: vacuolar membrane (GO:0005774);; Biological Process: mRNA processing (GO:0006397);; Biological Process: regulation of translation (GO:0006417);; Biological Process: plastid organization (GO:0009657);; Cellular Component: chloroplast envelope (GO:0009941);; Biological Process: negative regulation of exoribonuclease …	--	[R]	General function prediction only	Tetratricopeptide repeat;; Tetratricopeptide repeat;; Tetratricopeptide repeat;; Tetratricopeptide repeat;; Tetratricopeptide repeat;; Tetratricopeptide repeat;; Tetratricopeptide repeat;; Tetratricopeptide repeat;; Tetratricopeptide repeat	Protein high chlorophyll fluorescent 107 OS=Arabidopsis thaliana OX=3702 GN=HCF107 PE=1 SV=1	S	Function unknown	PREDICTED: protein high chlorophyll fluorescent 107 [Daucus carota subsp. sativus]
c37431.graph_c0	2419	2610	2530	577	369	537	159.55	151.04	162.32	32.22	22.85	36.86	3.63023e-07	-2.10085	down	[O]	Posttranslational modification, protein turnover, chaperones	Biological Process: sulfate assimilation (GO:0000103);; Biological Process: protein folding (GO:0006457);; Biological Process: glycerol ether metabolic process (GO:0006662);; Cellular Component: chloroplast (GO:0009507);; Molecular Function: protein disulfide oxidoreductase activity (GO:0015035);; Molecular Function: oxidoreductase activity, acting on a sulfur group of donors, disulfide as accept…	K03671|2.10319e-73|sind:105165382|K03671 thioredoxin 1 | (RefSeq) thioredoxin	[O]	Posttranslational modification, protein turnover, chaperones	Thioredoxin;; Thioredoxin-like domain;; Thioredoxin-like;; Hydrogenase-1 expression protein HyaE	Thioredoxin M4, chloroplastic OS=Arabidopsis thaliana OX=3702 GN=At3g15360 PE=2 SV=2	O	Posttranslational modification, protein turnover, chaperones	PREDICTED: thioredoxin-1 [Daucus carota subsp. sativus]
c39442.graph_c2	8	15	6	40	34	67	0.46	0.76	0.34	1.98	1.86	4.05	0.00434903	2.27902	up	--	--	Cellular Component: plasma membrane (GO:0005886);;	--	--	--	--	--	S	Function unknown	PREDICTED: inter alpha-trypsin inhibitor, heavy chain 4 [Daucus carota subsp. sativus]
c38124.graph_c0	28	35	124	227	138	618	2.96	3.3	12.72	19.9	13.77	69.08	0.00454716	2.34019	up	--	--	Cellular Component: plasmodesma (GO:0009506);;	--	--	--	Probable lipid transfer;; Protease inhibitor/seed storage/LTP family	--	U	Intracellular trafficking, secretion, and vesicular transport	PREDICTED: non-specific lipid-transfer protein [Daucus carota subsp. sativus]
c42051.graph_c0	405	636	1192	2770	3274	1849	21.02	29.8	61.22	137.34	151.84	108.69	0.00161042	1.87891	up	--	--	--	--	--	--	Homeobox domain	WUSCHEL-related homeobox 4 OS=Arabidopsis thaliana OX=3702 GN=WOX4 PE=1 SV=1	K	Transcription	PREDICTED: WUSCHEL-related homeobox 4 isoform X1 [Daucus carota subsp. sativus]
c47817.graph_c0	284	169	268	1143	483	2143	10.64	5.51	9.71	36.36	16.98	82.91	0.000165212	2.41477	up	--	--	Molecular Function: hydrolase activity, hydrolyzing O-glycosyl compounds (GO:0004553);; Biological Process: carbohydrate metabolic process (GO:0005975);;	--	--	--	Glycosyl hydrolases family 17;; X8 domain	Glucan endo-1,3-beta-glucosidase 12 OS=Arabidopsis thaliana OX=3702 GN=At4g29360 PE=1 SV=1	G	Carbohydrate transport and metabolism	PREDICTED: glucan endo-1,3-beta-glucosidase 12-like [Daucus carota subsp. sativus]
c24312.graph_c0	704	43	42	5	1	1	39.27	2.1	2.27	0.24	0.05	0.06	0.000525884	-4.12826	down	[F]	Nucleotide transport and metabolism	Molecular Function: catalytic activity (GO:0003824);; Biological Process: nucleoside metabolic process (GO:0009116);; Cellular Component: integral component of membrane (GO:0016021);;	--	--	--	Phosphorylase superfamily	Bark storage protein A OS=Populus deltoides OX=3696 GN=BSPA PE=2 SV=1	F	Nucleotide transport and metabolism	PREDICTED: bark storage protein A [Daucus carota subsp. sativus]
c50191.graph_c0	268	118	259	21	1	13	7.82	4.2	7.33	0.57	0.03	0.35	6.0443e-08	-3.7268	down	--	--	Molecular Function: protein dimerization activity (GO:0046983);; Biological Process: organic substance biosynthetic process (GO:1901576);;	--	--	--	bHLH-MYC and R2R3-MYB transcription factors N-terminal;; Helix-loop-helix DNA-binding domain	Truncated basic helix-loop-helix protein A OS=Pisum sativum OX=3888 GN=BHLH PE=3 SV=1	K	Transcription	PREDICTED: basic helix-loop-helix protein A isoform X3 [Daucus carota subsp. sativus]
c37980.graph_c0	193	13	357	13	10	36	15.55	1.05	25.37	1.26	1.17	4.06	0.0088389	-2.57159	down	[F]	Nucleotide transport and metabolism	Molecular Function: nucleoside diphosphate kinase activity (GO:0004550);; Molecular Function: ATP binding (GO:0005524);; Cellular Component: intracellular (GO:0005622);; Biological Process: nucleoside diphosphate phosphorylation (GO:0006165);; Biological Process: GTP biosynthetic process (GO:0006183);; Biological Process: UTP biosynthetic process (GO:0006228);; Biological Process: CTP biosyntheti…	K00940|1.01373e-48|sind:105179899|K00940 nucleoside-diphosphate kinase [EC:2.7.4.6] | (RefSeq) nucleoside diphosphate kinase 1-like	[F]	Nucleotide transport and metabolism	Nucleoside diphosphate kinase	Nucleoside diphosphate kinase B OS=Flaveria bidentis OX=4224 PE=2 SV=1	F	Nucleotide transport and metabolism	PREDICTED: nucleoside diphosphate kinase 1-like [Daucus carota subsp. sativus]
c44538.graph_c0	2049	1051	2681	169	137	233	85.78	38.25	108.66	6	5.37	10.08	1.06212e-08	-3.04989	down	[M]	Cell wall/membrane/envelope biogenesis	Molecular Function: catalytic activity (GO:0003824);; Molecular Function: coenzyme binding (GO:0050662);;	--	--	--	NAD dependent epimerase/dehydratase family	Chloroplast stem-loop binding protein of 41 kDa a, chloroplastic OS=Arabidopsis thaliana OX=3702 GN=CSP41A PE=1 SV=1	S	Function unknown	PREDICTED: chloroplast stem-loop binding protein of 41 kDa a, chloroplastic [Daucus carota subsp. sativus]
c43105.graph_c0	1585	1520	2483	15338	10649	18894	71.32	58.55	110.96	636.07	478.64	960.51	7.88342e-11	3.05153	up	--	--	Molecular Function: hydrolase activity (GO:0016787);; Biological Process: single-organism process (GO:0044699);;	K05857|3.66824e-34|mdm:103418706|K05857 phosphatidylinositol phospholipase C, delta [EC:3.1.4.11] | (RefSeq) phosphoinositide phospholipase C 4-like	[T]	Signal transduction mechanisms	Phosphatidylinositol-specific phospholipase C, Y domain	Phosphoinositide phospholipase C 6 OS=Arabidopsis thaliana OX=3702 GN=PLC6 PE=2 SV=2	S	Function unknown	PREDICTED: phosphoinositide phospholipase C 4-like [Daucus carota subsp. sativus]
c42223.graph_c0	339	246	339	1870	3099	3454	12.37	7.74	11.99	59.91	111.73	138.46	5.08827e-11	3.26261	up	[T]	Signal transduction mechanisms	Molecular Function: protein serine/threonine kinase activity (GO:0004674);; Molecular Function: ATP binding (GO:0005524);; Cellular Component: nucleus (GO:0005634);; Cellular Component: cytoplasm (GO:0005737);; Biological Process: endocytosis (GO:0006897);; Biological Process: regulation of cell shape (GO:0008360);; Biological Process: Wnt signaling pathway (GO:0016055);; Biological Process: pept…	K02218|2.40012e-92|vvi:100244694|K02218 casein kinase 1 [EC:2.7.11.1] | (RefSeq) casein kinase 1-like protein 2	[T]	Signal transduction mechanisms	Protein kinase domain;; Protein tyrosine kinase	Casein kinase 1-like protein 1 OS=Arabidopsis thaliana OX=3702 GN=CKL1 PE=2 SV=2	T	Signal transduction mechanisms	PREDICTED: casein kinase I-like [Nicotiana tabacum]
c51136.graph_c0	244	680	113	60	29	19	5.31	12.77	2.37	1.11	0.59	0.43	1.93835e-05	-2.8546	down	--	--	--	--	--	--	HEAT-like repeat;; HEAT repeats;; HEAT repeat;; Required for nuclear transport of RNA pol II C-terminus 1;; Vacuolar 14 Fab1-binding region	TORTIFOLIA1-like protein 4 OS=Arabidopsis thaliana OX=3702 GN=TOR1L4 PE=2 SV=1	S	Function unknown	PREDICTED: microtubule-associated protein TORTIFOLIA1-like [Daucus carota subsp. sativus]
c45423.graph_c0	1891	2289	1792	5089	12377	5147	53.33	55.83	48.9	121.88	327.61	149.36	0.00031511	2.05744	up	--	--	Molecular Function: signal transducer activity (GO:0004871);; Cellular Component: plasmodesma (GO:0009506);; Biological Process: calcium-mediated signaling (GO:0019722);;	--	--	--	Rapid ALkalinization Factor (RALF)	Protein RALF-like 33 OS=Arabidopsis thaliana OX=3702 GN=RALFL33 PE=2 SV=1	S	Function unknown	PREDICTED: rapid alkalinization factor [Daucus carota subsp. sativus]
c35076.graph_c0	521	398	548	2299	5459	5426	52.15	36.25	52.26	186.43	497.04	544.57	1.90239e-09	3.23594	up	--	--	--	--	--	--	--	--	S	Function unknown	hypothetical protein DCAR_003222 [Daucus carota subsp. sativus]
c42169.graph_c1	278	303	314	84	87	78	16.23	15.45	18	4.19	4.84	4.73	0.00152762	-1.58552	down	--	--	Cellular Component: integral component of membrane (GO:0016021);;	--	--	--	--	Ycf3-interacting protein 1, chloroplastic OS=Nicotiana tabacum OX=4097 PE=1 SV=2	S	Function unknown	PREDICTED: ycf3-interacting protein 1, chloroplastic [Daucus carota subsp. sativus]
c50704.graph_c0	482	413	449	1403	1774	4477	13.77	10.56	12.56	37.21	48.24	133.34	1.4326e-05	2.60785	up	--	--	--	--	[I]	Lipid transport and metabolism	Oxysterol-binding protein	Oxysterol-binding protein-related protein 3C OS=Arabidopsis thaliana OX=3702 GN=ORP3C PE=2 SV=1	S	Function unknown	PREDICTED: oxysterol-binding protein-related protein 3C [Daucus carota subsp. sativus]
c45251.graph_c0	5414	5183	5783	17433	13824	12770	198.35	167.44	206.05	540.88	469.41	477.19	0.000170011	1.54744	up	--	--	Molecular Function: RNA polymerase II regulatory region sequence-specific DNA binding (GO:0000977);; Molecular Function: RNA polymerase II transcription factor binding (GO:0001085);; Molecular Function: transcriptional activator activity, RNA polymerase II transcription regulatory region sequence-specific binding (GO:0001228);; Molecular Function: chromatin binding (GO:0003682);; Cellular Compone…	--	[K]	Transcription	GATA zinc finger	GATA transcription factor 8 OS=Arabidopsis thaliana OX=3702 GN=GATA8 PE=2 SV=1	K	Transcription	PREDICTED: GATA transcription factor 8-like [Daucus carota subsp. sativus]
c36964.graph_c2	1	6	0	33	78	13	0.15	0.84	0	4.25	11.25	2.13	0.00031198	3.53087	up	--	--	--	--	--	--	PDDEXK-like family of unknown function	--	S	Function unknown	PREDICTED: uncharacterized protein LOC108206280 [Daucus carota subsp. sativus]
c51382.graph_c0	451	267	541	2067	2207	4926	22.33	10.7	25.78	72.48	103.33	271.83	4.52972e-07	2.91135	up	--	--	Biological Process: cellular lipid metabolic process (GO:0044255);; Molecular Function: carboxylic ester hydrolase activity (GO:0052689);;	--	[R]	General function prediction only	Putative serine esterase (DUF676)	--	S	Function unknown	PREDICTED: LOW QUALITY PROTEIN: putative lipase YOR059C [Daucus carota subsp. sativus]
c30189.graph_c0	169	211	206	62	23	59	6.27	5.88	6.82	1.84	0.99	3.32	0.00324952	-1.76051	down	--	--	Biological Process: cellular protein metabolic process (GO:0044267);;	--	[O]	Posttranslational modification, protein turnover, chaperones	--	RING-H2 finger protein ATL43 OS=Arabidopsis thaliana OX=3702 GN=ATL43 PE=2 SV=2	O	Posttranslational modification, protein turnover, chaperones	PREDICTED: RING-H2 finger protein ATL43 [Daucus carota subsp. sativus]
c38345.graph_c0	6	8	8	29	42	115	0.27	0.43	0.58	1.39	2.96	5.75	0.000237708	2.96853	up	--	--	--	K18998|4.19861e-119|sind:105174550|K18998 RNA polymerase II C-terminal domain phosphatase-like 1/2 [EC:3.1.3.16] | (RefSeq) RNA polymerase II C-terminal domain phosphatase-like 2	[K]	Transcription	NLI interacting factor-like phosphatase	RNA polymerase II C-terminal domain phosphatase-like 2 OS=Arabidopsis thaliana OX=3702 GN=CPL2 PE=1 SV=3	K	Transcription	PREDICTED: RNA polymerase II C-terminal domain phosphatase-like 2 isoform X4 [Daucus carota subsp. sativus]
c36150.graph_c0	925	1487	154	289	126	78	44.27	62.02	7.15	11.73	5.66	3.87	0.00859145	-2.05562	down	[IR]	Lipid transport and metabolism ;; General function prediction only	--	--	--	--	GDSL-like Lipase/Acylhydrolase	GDSL esterase/lipase At1g29670 OS=Arabidopsis thaliana OX=3702 GN=At1g29670 PE=2 SV=1	S	Function unknown	PREDICTED: GDSL esterase/lipase At1g29670-like isoform X1 [Daucus carota subsp. sativus]
c49987.graph_c0	198	130	281	593	721	1358	8.66	5.1	11.92	21.02	30.02	59.18	0.000316891	2.22134	up	--	--	--	--	[O]	Posttranslational modification, protein turnover, chaperones	--	--	O	Posttranslational modification, protein turnover, chaperones	hypothetical protein DCAR_014978 [Daucus carota subsp. sativus]
c45301.graph_c0	912	385	536	142	132	64	52.13	19.18	29.75	6.99	7.04	3.86	0.000100096	-2.17646	down	--	--	--	--	--	--	Senescence regulator	--	S	Function unknown	PREDICTED: uncharacterized protein LOC108225068 [Daucus carota subsp. sativus]
c22485.graph_c0	70	18	10	1	3	1	9.35	2.16	1.32	0.11	0.38	0.14	0.00274333	-3.17272	down	--	--	--	--	--	--	--	--	--	--	hypothetical protein DCAR_003932 [Daucus carota subsp. sativus]
c45120.graph_c0	349	385	178	38	11	28	15.61	14.97	7.68	1.43	0.46	1.29	5.44818e-09	-3.20469	down	--	--	--	--	--	--	--	--	S	Function unknown	PREDICTED: calcium-binding and coiled-coil domain-containing protein 2-like isoform X1 [Daucus carota subsp. sativus]
c48997.graph_c0	2248	5596	1236	827	155	728	179.46	364.69	137.81	84.42	26.17	90.88	0.00644298	-2.03344	down	--	--	--	--	--	--	Pollen proteins Ole e I like	Major pollen allergen Lol p 11 OS=Lolium perenne OX=4522 PE=1 SV=1	S	Function unknown	PREDICTED: 36.4 kDa proline-rich protein-like [Daucus carota subsp. sativus]
c43388.graph_c1	100	95	24	355	208	192	3.33	3.01	0.69	9.56	6.34	6.51	0.0055239	1.81778	up	--	--	--	--	--	--	Plant protein of unknown function (DUF641)	Protein GRAVITROPIC IN THE LIGHT 1 OS=Arabidopsis thaliana OX=3702 GN=GIL1 PE=2 SV=1	S	Function unknown	PREDICTED: IRK-interacting protein-like [Daucus carota subsp. sativus]
c50728.graph_c0	205	135	318	872	505	589	5.4	3.09	8.09	19.52	12.48	15.97	0.00422916	1.61867	up	--	--	--	--	--	--	Domain of unknown function (DUF3527)	--	S	Function unknown	PREDICTED: uncharacterized protein LOC108205110 [Daucus carota subsp. sativus]
c48056.graph_c0	13210	8271	20617	3732	2182	2841	243.11	131.49	366.2	58.52	37.7	53.71	0.000106923	-2.03496	down	[E]	Amino acid transport and metabolism	Molecular Function: glycine dehydrogenase (decarboxylating) activity (GO:0004375);; Cellular Component: mitochondrion (GO:0005739);; Cellular Component: cytosol (GO:0005829);; Cellular Component: glycine cleavage complex (GO:0005960);; Molecular Function: glycine binding (GO:0016594);; Biological Process: glycine decarboxylation via glycine cleavage system (GO:0019464);; Biological Process: oxida…	K00281|0|nnu:104600737|K00281 glycine dehydrogenase [EC:1.4.4.2] | (RefSeq) glycine dehydrogenase (decarboxylating), mitochondrial	[E]	Amino acid transport and metabolism	Glycine cleavage system P-protein;; Aminotransferase class-V;; Beta-eliminating lyase;; Glycine cleavage system P-protein	Glycine dehydrogenase (decarboxylating), mitochondrial OS=Flaveria anomala OX=35877 GN=GDCSP PE=3 SV=1	E	Amino acid transport and metabolism	PREDICTED: glycine dehydrogenase (decarboxylating), mitochondrial [Daucus carota subsp. sativus]
c37140.graph_c0	280	494	92	80	55	40	13.58	14.74	5.47	2.8	2.78	2	0.00382623	-1.9712	down	--	--	--	--	[R]	General function prediction only	zinc-binding in reverse transcriptase;; Reverse transcriptase-like;; Domain of unknown function (DUF4283);; Zinc knuckle;; C1 domain;; Reverse transcriptase (RNA-dependent DNA polymerase);; Reverse transcriptase (RNA-dependent DNA polymerase)	Putative ribonuclease H protein At1g65750 OS=Arabidopsis thaliana OX=3702 GN=At1g65750 PE=3 SV=1	S	Function unknown	PREDICTED: uncharacterized protein LOC108212537 [Daucus carota subsp. sativus]
c49302.graph_c0	1862	900	808	540	48	83	106.13	37.64	47.16	24.91	2.38	3.95	0.00448654	-2.23281	down	--	--	--	--	--	--	Carbohydrate-binding protein of the ER;; Leucine rich repeat;; Leucine Rich repeats (2 copies);; Leucine Rich Repeat	Probable LRR receptor-like serine/threonine-protein kinase At1g07560 OS=Arabidopsis thaliana OX=3702 GN=At1g07560 PE=2 SV=1	--	--	PREDICTED: putative leucine-rich repeat receptor-like protein kinase At2g19210 [Daucus carota subsp. sativus]
c38483.graph_c0	1211	1042	2068	518	374	54	76.11	57.84	125.78	27.88	22.48	3.58	0.00997809	-1.95501	down	--	--	--	--	--	--	Domain of unknown function (DUF4228)	--	S	Function unknown	PREDICTED: uncharacterized protein LOC108203449 [Daucus carota subsp. sativus]
c41033.graph_c0	717	831	937	238	261	205	40.96	41.86	52.59	11.11	13.71	12.71	0.00103115	-1.56687	down	--	--	--	--	--	--	--	--	S	Function unknown	PREDICTED: uncharacterized protein LOC108193832 isoform X1 [Daucus carota subsp. sativus]
c39609.graph_c0	722	1224	1105	202	214	266	64.99	97.76	97.21	15.36	18.14	25.13	0.000237708	-1.84906	down	--	--	--	--	--	--	--	Light-harvesting complex-like protein OHP2, chloroplastic OS=Arabidopsis thaliana OX=3702 GN=OHP2 PE=2 SV=1	S	Function unknown	PREDICTED: PH domain-containing protein DDB_G0287875 [Daucus carota subsp. sativus]
c52206.graph_c1	979	752	1174	41	57	81	52.17	35.13	60.4	2.11	3.52	4.5	2.08814e-12	-3.57651	down	[R]	General function prediction only	Cellular Component: chloroplast thylakoid membrane (GO:0009535);; Cellular Component: chloroplast envelope (GO:0009941);; Cellular Component: plastoglobule (GO:0010287);; Molecular Function: oxidoreductase activity (GO:0016491);; Biological Process: oxidation-reduction process (GO:0055114);;	--	[C]	Energy production and conversion	Aldo/keto reductase family	Uncharacterized oxidoreductase At1g06690, chloroplastic OS=Arabidopsis thaliana OX=3702 GN=At1g06690 PE=1 SV=1	C	Energy production and conversion	PREDICTED: uncharacterized oxidoreductase At1g06690, chloroplastic [Daucus carota subsp. sativus]
c50502.graph_c0	1125	2481	1510	461	404	377	26.15	49.77	33.6	9.04	8.94	8.93	0.000251035	-1.76506	down	[J]	Translation, ribosomal structure and biogenesis	Molecular Function: translation elongation factor activity (GO:0003746);; Molecular Function: GTPase activity (GO:0003924);; Molecular Function: GTP binding (GO:0005525);; Biological Process: translational elongation (GO:0006414);; Cellular Component: chloroplast (GO:0009507);; Biological Process: ribosome disassembly (GO:0032790);;	K02355|0|cit:102624603|K02355 elongation factor G | (RefSeq) elongation factor G-2, chloroplastic	[J]	Translation, ribosomal structure and biogenesis	Elongation factor Tu GTP binding domain;; Elongation factor G, domain IV;; Elongation Factor G, domain II;; Elongation factor G C-terminus;; Elongation factor Tu domain 2	Elongation factor G-2, chloroplastic OS=Glycine max OX=3847 GN=fusA2 PE=3 SV=1	J	Translation, ribosomal structure and biogenesis	PREDICTED: elongation factor G-2, chloroplastic [Daucus carota subsp. sativus]
c46098.graph_c0	71	177	30	15	8	15	2.53	5.7	1.02	0.46	0.28	0.53	0.00297412	-2.36887	down	--	--	Cellular Component: nucleus (GO:0005634);; Cellular Component: cytosol (GO:0005829);; Cellular Component: plasma membrane (GO:0005886);;	--	[U]	Intracellular trafficking, secretion, and vesicular transport	VID27 cytoplasmic protein;; Weak chloroplast movement under blue light	Protein CYPRO4 OS=Cynara cardunculus OX=4265 GN=CYPRO4 PE=2 SV=1	U	Intracellular trafficking, secretion, and vesicular transport	PREDICTED: protein CYPRO4 [Daucus carota subsp. sativus]
c51074.graph_c0	364	652	292	113	15	25	11.39	16.01	8.33	2.65	0.36	0.59	1.25765e-05	-2.82852	down	[K]	Transcription	Molecular Function: protein kinase activity (GO:0004672);; Molecular Function: ATP binding (GO:0005524);; Biological Process: protein phosphorylation (GO:0006468);; Cellular Component: integral component of membrane (GO:0016021);; Molecular Function: 2-alkenal reductase [NAD(P)] activity (GO:0032440);; Biological Process: oxidation-reduction process (GO:0055114);;	--	--	--	Protein kinase domain;; Protein tyrosine kinase;; Leucine rich repeat;; Leucine Rich repeats (2 copies);; Leucine rich repeat N-terminal domain;; Leucine Rich Repeat	Probably inactive leucine-rich repeat receptor-like protein kinase At5g06940 OS=Arabidopsis thaliana OX=3702 GN=At5g06940 PE=3 SV=1	S	Function unknown	PREDICTED: probably inactive leucine-rich repeat receptor-like protein kinase At5g06940 [Daucus carota subsp. sativus]
c41791.graph_c2	84	99	140	267	322	273	9.07	9.53	14.82	24.3	32.66	31.05	0.00628537	1.54397	up	[J]	Translation, ribosomal structure and biogenesis	Molecular Function: translation elongation factor activity (GO:0003746);; Molecular Function: GTPase activity (GO:0003924);; Molecular Function: GTP binding (GO:0005525);; Cellular Component: cytoplasm (GO:0005737);; Biological Process: translational elongation (GO:0006414);;	K03231|0|aip:107617360|K03231 elongation factor 1-alpha | (RefSeq) elongation factor 1-alpha-like	[J]	Translation, ribosomal structure and biogenesis	Elongation factor Tu GTP binding domain	Elongation factor 1-alpha OS=Daucus carota OX=4039 PE=1 SV=1	J	Translation, ribosomal structure and biogenesis	PREDICTED: elongation factor 1-alpha-like [Daucus carota subsp. sativus]
c49455.graph_c0	1978	2251	2895	1332	305	439	45.55	44.61	64.08	26.09	6.57	10.35	0.00605279	-1.65378	down	[O]	Posttranslational modification, protein turnover, chaperones	Molecular Function: serine-type endopeptidase activity (GO:0004252);; Cellular Component: cell wall (GO:0005618);; Biological Process: proteolysis (GO:0006508);;	--	--	--	Subtilase family;; Peptidase inhibitor I9;; PA domain	Subtilisin-like protease SBT1.7 OS=Arabidopsis thaliana OX=3702 GN=SBT1.7 PE=1 SV=1	O	Posttranslational modification, protein turnover, chaperones	PREDICTED: subtilisin-like protease SBT1.7 [Daucus carota subsp. sativus]
c38885.graph_c0	2723	5457	6315	677	1436	1144	163.05	285.97	367.38	34.34	80.77	71.18	0.00459938	-1.779	down	--	--	Molecular Function: calcium ion binding (GO:0005509);; Cellular Component: photosystem II oxygen evolving complex (GO:0009654);; Biological Process: photosynthesis (GO:0015979);; Cellular Component: extrinsic component of membrane (GO:0019898);;	K08901|4.10082e-87|cit:102620317|K08901 photosystem II oxygen-evolving enhancer protein 3 | (RefSeq) oxygen-evolving enhancer protein 3-2, chloroplastic	--	--	Oxygen evolving enhancer protein 3 (PsbQ)	Oxygen-evolving enhancer protein 3-2, chloroplastic OS=Arabidopsis thaliana OX=3702 GN=PSBQ2 PE=1 SV=2	S	Function unknown	PREDICTED: oxygen-evolving enhancer protein 3-2, chloroplastic [Daucus carota subsp. sativus]
c44796.graph_c0	286	450	327	176	60	75	11.71	16.03	12.96	6.11	2.3	3.17	0.00369789	-1.59787	down	[C]	Energy production and conversion	Biological Process: photosynthesis (GO:0015979);; Biological Process: chlorophyll biosynthetic process (GO:0015995);; Molecular Function: oxidoreductase activity, acting on the CH-CH group of donors, NAD or NADP as acceptor (GO:0016628);; Molecular Function: geranylgeranyl reductase activity (GO:0045550);; Biological Process: oxidation-reduction process (GO:0055114);; Molecular Function: FAD bind…	K10960|0|mdm:103441948|K10960 geranylgeranyl diphosphate/geranylgeranyl-bacteriochlorophyllide a reductase [EC:1.3.1.83 1.3.1.111] | (RefSeq) geranylgeranyl diphosphate reductase, chloroplastic-like	--	--	FAD binding domain	Geranylgeranyl diphosphate reductase, chloroplastic OS=Nicotiana tabacum OX=4097 GN=CHLP PE=2 SV=1	C	Energy production and conversion	PREDICTED: geranylgeranyl diphosphate reductase, chloroplastic-like [Daucus carota subsp. sativus]
c17784.graph_c0	7208	1223	4391	1329	469	278	547.49	81.86	325.02	85.38	33.46	22.1	0.000807091	-2.3996	down	--	--	--	--	--	--	EF-hand domain;; EF hand	--	S	Function unknown	PREDICTED: uncharacterized protein LOC108200921 [Daucus carota subsp. sativus]
c43331.graph_c0	370	1421	977	68	190	162	29.64	97.84	77.88	4.73	14.61	13.43	0.00129381	-2.22366	down	--	--	Cellular Component: chloroplast thylakoid membrane (GO:0009535);; Cellular Component: chloroplast stroma (GO:0009570);; Biological Process: response to cytokinin (GO:0009735);; Cellular Component: chloroplast envelope (GO:0009941);; Cellular Component: thylakoid lumen (GO:0031977);;	--	--	--	--	Thylakoid lumenal 16.5 kDa protein, chloroplastic OS=Arabidopsis thaliana OX=3702 GN=At4g02530 PE=1 SV=3	S	Function unknown	PREDICTED: thylakoid lumenal 16.5 kDa protein, chloroplastic [Daucus carota subsp. sativus]
c47467.graph_c0	49	259	4	10	4	2	2.24	10.88	0.17	0.42	0.18	0.1	0.00101984	-3.30898	down	--	--	Biological Process: cellular process (GO:0009987);;	--	--	--	bHLH-MYC and R2R3-MYB transcription factors N-terminal	Protein RICE SALT SENSITIVE 3 OS=Oryza sativa subsp. japonica OX=39947 GN=RSS3 PE=1 SV=1	S	Function unknown	PREDICTED: uncharacterized protein LOC108214823 [Daucus carota subsp. sativus]
c24373.graph_c0	53	93	285	19	4	9	3.5	5.39	18.3	1.06	0.25	0.62	1.6096e-05	-3.27856	down	--	--	Molecular Function: ligase activity (GO:0016874);;	--	--	--	Lateral organ boundaries (LOB) domain	LOB domain-containing protein 4 OS=Arabidopsis thaliana OX=3702 GN=LBD4 PE=1 SV=1	S	Function unknown	PREDICTED: LOB domain-containing protein 4-like [Daucus carota subsp. sativus]
c40997.graph_c0	226	98	470	1613	745	1398	13.93	5.43	26.36	79.87	40.05	83.34	0.00109298	2.18395	up	--	--	--	--	--	--	C2 domain	--	S	Function unknown	PREDICTED: protein SRC2 [Daucus carota subsp. sativus]
c48498.graph_c0	68	39	46	248	276	225	5.64	3.17	3.15	15.74	19.48	17.76	3.589e-06	2.364	up	--	--	Cellular Component: membrane (GO:0016020);; Molecular Function: metal ion binding (GO:0046872);;	--	[A]	RNA processing and modification	Protein of unknown function (DUF3675);; RING-variant domain	Probable E3 ubiquitin ligase SUD1 OS=Arabidopsis thaliana OX=3702 GN=SUD1 PE=1 SV=1	O	Posttranslational modification, protein turnover, chaperones	PREDICTED: E3 ubiquitin-protein ligase MARCH1 [Daucus carota subsp. sativus]
c25056.graph_c0	193	188	222	36	77	21	11.7	9.93	13	1.83	4.33	1.31	0.00831266	-1.82088	down	--	--	--	--	[GC]	--	UDP-glucoronosyl and UDP-glucosyl transferase	UDP-glucose iridoid glucosyltransferase OS=Catharanthus roseus OX=4058 GN=UGT76A2 PE=1 SV=1	S	Function unknown	PREDICTED: UDP-glucose iridoid glucosyltransferase-like isoform X1 [Daucus carota subsp. sativus]
c42327.graph_c1	430	1151	190	149	108	88	61.4	146.4	26.25	17.96	14.33	13.19	0.00335921	-1.99642	down	--	--	Cellular Component: nucleosome (GO:0000786);; Molecular Function: DNA binding (GO:0003677);; Cellular Component: nucleus (GO:0005634);; Molecular Function: protein heterodimerization activity (GO:0046982);;	K11252|6.97889e-64|fve:105350573|K11252 histone H2B | (RefSeq) histone H2B-like	[B]	Chromatin structure and dynamics	Core histone H2A/H2B/H3/H4;; Histone-like transcription factor (CBF/NF-Y) and archaeal histone	Histone H2B OS=Gossypium hirsutum OX=3635 GN=HIS2B PE=2 SV=3	B	Chromatin structure and dynamics	PREDICTED: histone H2B-like [Daucus carota subsp. sativus]
c42221.graph_c0	410	292	398	829	870	1306	18.47	11.15	17.67	31.91	36.29	62.02	0.00423657	1.59725	up	--	--	Cellular Component: nucleus (GO:0005634);; Cellular Component: cytoplasm (GO:0005737);; Molecular Function: glycolipid transporter activity (GO:0017089);; Biological Process: glycolipid transport (GO:0046836);; Molecular Function: glycolipid binding (GO:0051861);;	--	[S]	Function unknown	--	ACD11 homolog protein OS=Arabidopsis thaliana OX=3702 GN=At4g39670 PE=2 SV=1	U	Intracellular trafficking, secretion, and vesicular transport	hypothetical protein DCAR_007239 [Daucus carota subsp. sativus]
c33557.graph_c0	783	241	416	81	6	6	47.4	12.78	24.47	4.15	0.34	0.38	4.0644e-06	-3.56212	down	--	--	--	--	--	--	C1 domain	--	S	Function unknown	PREDICTED: diacylglycerol kinase theta-like [Erythranthe guttata]
c50706.graph_c0	3248	4263	6031	1013	827	1016	226.26	260.87	408.92	59.72	54.09	73.73	3.29929e-05	-1.97839	down	[G]	Carbohydrate transport and metabolism	Molecular Function: phosphoglycerate kinase activity (GO:0004618);; Molecular Function: ATP binding (GO:0005524);; Biological Process: glycolytic process (GO:0006096);;	K00927|3.20992e-176|nnu:104606042|K00927 phosphoglycerate kinase [EC:2.7.2.3] | (RefSeq) phosphoglycerate kinase, chloroplastic-like	[G]	Carbohydrate transport and metabolism	Phosphoglycerate kinase	Phosphoglycerate kinase, chloroplastic OS=Nicotiana tabacum OX=4097 PE=2 SV=1	G	Carbohydrate transport and metabolism	PREDICTED: phosphoglycerate kinase, chloroplastic [Daucus carota subsp. sativus]
c48337.graph_c0	85	77	61	307	358	241	4.17	3.05	2.98	13.1	17.37	12.58	1.04933e-05	2.12854	up	--	--	--	K04506|4.06294e-58|mdm:103444341|K04506 E3 ubiquitin-protein ligase SIAH1 [EC:2.3.2.27] | (RefSeq) E3 ubiquitin-protein ligase SINA-like 10	[R]	General function prediction only	--	Putative E3 ubiquitin-protein ligase SINA-like 6 OS=Arabidopsis thaliana OX=3702 GN=At5g37870 PE=3 SV=1	O	Posttranslational modification, protein turnover, chaperones	PREDICTED: putative E3 ubiquitin-protein ligase SINA-like 6 isoform X3 [Daucus carota subsp. sativus]
c49836.graph_c0	1173	248	1276	247	155	207	25.4	4.62	27.01	4.91	3.38	4.73	0.00925209	-1.86826	down	[G]	Carbohydrate transport and metabolism	Molecular Function: ATP binding (GO:0005524);; Biological Process: pyruvate metabolic process (GO:0006090);; Molecular Function: kinase activity (GO:0016301);; Biological Process: phosphorylation (GO:0016310);; Molecular Function: metal ion binding (GO:0046872);; Molecular Function: pyruvate, phosphate dikinase activity (GO:0050242);;	--	--	--	PEP-utilising enzyme, TIM barrel domain;; Pyruvate phosphate dikinase, PEP/pyruvate binding domain;; PEP-utilising enzyme, mobile domain	Pyruvate, phosphate dikinase, chloroplastic OS=Mesembryanthemum crystallinum OX=3544 GN=PPD PE=2 SV=1	G	Carbohydrate transport and metabolism	PREDICTED: pyruvate, phosphate dikinase, chloroplastic isoform X2 [Daucus carota subsp. sativus]
c39950.graph_c0	856	321	1993	140	147	235	70.1	24.25	167.22	10.16	11.72	21.06	0.00298062	-2.20118	down	--	--	Molecular Function: DNA binding (GO:0003677);; Molecular Function: transcription factor activity, sequence-specific DNA binding (GO:0003700);; Cellular Component: nucleus (GO:0005634);; Biological Process: regulation of transcription, DNA-templated (GO:0006355);;	--	--	--	AP2 domain	Ethylene-responsive transcription factor ERF016 OS=Arabidopsis thaliana OX=3702 GN=ERF016 PE=2 SV=1	K	Transcription	PREDICTED: ethylene-responsive transcription factor ERF017 [Daucus carota subsp. sativus]
c39047.graph_c0	510	731	534	1380	1473	1185	68.3	88.15	70.55	155.33	185.36	168.33	0.00479369	1.34824	up	[M]	Cell wall/membrane/envelope biogenesis	Molecular Function: protein serine/threonine kinase activity (GO:0004674);; Molecular Function: ATP binding (GO:0005524);; Biological Process: protein phosphorylation (GO:0006468);;	K14498|3.79791e-95|sind:105172554|K14498 serine/threonine-protein kinase SRK2 [EC:2.7.11.1] | (RefSeq) serine/threonine-protein kinase SRK2A-like	[T]	Signal transduction mechanisms	Protein kinase domain;; Protein tyrosine kinase	Serine/threonine-protein kinase SRK2A OS=Arabidopsis thaliana OX=3702 GN=SRK2A PE=1 SV=1	T	Signal transduction mechanisms	serine/threonine-protein kinase SRK2A-like [Olea europaea var. sylvestris]
c33530.graph_c0	2778	759	1275	574	186	61	182.45	43.72	81.48	31.96	11.47	4.17	0.00175376	-2.33757	down	--	--	--	--	[BK]	--	Divergent CRAL/TRIO domain	--	S	Function unknown	PREDICTED: protein GDAP2 homolog [Daucus carota subsp. sativus]
c35608.graph_c0	12	31	16	229	117	105	4.59	11.5	6.33	71.73	42.02	45	2.59888e-07	2.88186	up	--	--	Cellular Component: plasma membrane (GO:0005886);; Molecular Function: zinc ion binding (GO:0008270);; Cellular Component: integral component of membrane (GO:0016021);; Molecular Function: cellulose synthase (UDP-forming) activity (GO:0016760);; Biological Process: cellulose biosynthetic process (GO:0030244);; Biological Process: cell wall organization (GO:0071555);;	K10999|9.95463e-44|sind:105159398|K10999 cellulose synthase A [EC:2.4.1.12] | (RefSeq) cellulose synthase A catalytic subunit 2 [UDP-forming]-like	--	--	--	Cellulose synthase A catalytic subunit 6 [UDP-forming] OS=Arabidopsis thaliana OX=3702 GN=CESA6 PE=1 SV=2	M	Cell wall/membrane/envelope biogenesis	hypothetical protein DCAR_001143 [Daucus carota subsp. sativus]
c43121.graph_c0	2611	3723	3478	920	1035	928	124.27	155.59	151.85	39.66	47.52	46.32	0.00160013	-1.49884	down	[H]	Coenzyme transport and metabolism	Cellular Component: cytoplasm (GO:0005737);; Molecular Function: S-adenosylmethionine-dependent methyltransferase activity (GO:0008757);; Cellular Component: integral component of membrane (GO:0016021);; Biological Process: methylation (GO:0032259);;	K12502|3.95764e-80|fve:101310277|K12502 MPBQ/MSBQ methyltransferase [EC:2.1.1.295] | (RefSeq) 2-methyl-6-phytyl-1,4-hydroquinone methyltransferase, chloroplastic	[H]	Coenzyme transport and metabolism	Methyltransferase domain;; Methyltransferase domain;; ubiE/COQ5 methyltransferase family;; ubiE/COQ5 methyltransferase family	2-methyl-6-phytyl-1,4-hydroquinone methyltransferase, chloroplastic OS=Spinacia oleracea OX=3562 PE=1 SV=1	Q	Secondary metabolites biosynthesis, transport and catabolism	PREDICTED: 2-methyl-6-phytyl-1,4-hydroquinone methyltransferase, chloroplastic [Daucus carota subsp. sativus]
c39783.graph_c0	137	212	283	20	34	36	10.74	14.73	21.64	1.32	2.52	2.95	7.7994e-05	-2.40179	down	--	--	Cellular Component: integral component of membrane (GO:0016021);;	--	--	--	Protein of unknown function (DUF751)	--	S	Function unknown	PREDICTED: uncharacterized protein LOC108200377 [Daucus carota subsp. sativus]
c52064.graph_c1	1164	1045	1263	4191	2166	4954	29.65	22.52	29.07	74.39	56.99	111.42	0.000498465	1.80601	up	[MDT]	Cell wall/membrane/envelope biogenesis ;; Cell cycle control, cell division, chromosome partitioning ;; Signal transduction mechanisms	Cellular Component: nucleus (GO:0005634);; Molecular Function: microtubule-severing ATPase activity (GO:0008568);; Biological Process: cytoplasmic microtubule organization (GO:0031122);;	--	[O]	Posttranslational modification, protein turnover, chaperones	FHA domain;; ATPase family associated with various cellular activities (AAA)	ATPase family AAA domain-containing protein FIGL1 OS=Arabidopsis thaliana OX=3702 GN=FIGL1 PE=2 SV=2	O	Posttranslational modification, protein turnover, chaperones	PREDICTED: uncharacterized protein LOC108223114 isoform X1 [Daucus carota subsp. sativus]
c50803.graph_c0	210	134	266	64	54	42	10.1	4.98	12.36	4.03	2.25	1.9	0.00411903	-1.69326	down	--	--	Cellular Component: integral component of membrane (GO:0016021);;	--	--	--	--	Ubiquitin carboxyl-terminal hydrolase 24 OS=Arabidopsis thaliana OX=3702 GN=UBP24 PE=1 SV=1	S	Function unknown	PREDICTED: uncharacterized protein LOC108205634 isoform X1 [Daucus carota subsp. sativus]
c46333.graph_c1	12	9	21	115	58	132	0.4	0.26	0.67	3.21	1.83	4.4	2.18927e-05	2.78374	up	--	--	Cellular Component: intracellular (GO:0005622);; Biological Process: vacuolar transport (GO:0007034);;	K12194|5.11665e-27|nnu:104604451|K12194 charged multivesicular body protein 4 | (RefSeq) vacuolar protein sorting-associated protein 32 homolog 2-like	[U]	Intracellular trafficking, secretion, and vesicular transport	Snf7	Vacuolar protein sorting-associated protein 32 homolog 1 OS=Arabidopsis thaliana OX=3702 GN=VPS32.1 PE=1 SV=1	U	Intracellular trafficking, secretion, and vesicular transport	vacuolar protein sorting-associated protein 32 homolog 2-like, partial [Olea europaea var. sylvestris]
c41335.graph_c0	1871	1620	2349	6914	10077	5868	96.89	73.41	118.04	303.82	491.14	315.35	2.31771e-05	2.07648	up	[T]	Signal transduction mechanisms	--	K13448|3.82e-69|sind:105162569|K13448 calcium-binding protein CML | (RefSeq) probable calcium-binding protein CML36	[T]	Signal transduction mechanisms	EF hand;; EF-hand domain pair;; EF-hand domain;; EF hand;; EF-hand domain pair	Probable calcium-binding protein CML36 OS=Arabidopsis thaliana OX=3702 GN=CML36 PE=2 SV=1	DTZ	--	hypothetical protein DCAR_016967 [Daucus carota subsp. sativus]
c51272.graph_c0	2669	2922	2464	10919	8365	5328	99.41	94.48	92.19	351.51	296.76	208.07	5.38352e-05	1.70427	up	--	--	--	--	--	--	Protein of unknown function (DUF1005);; Protein of unknown function (DUF1005)	--	--	--	PREDICTED: uncharacterized protein LOC108224388 isoform X1 [Daucus carota subsp. sativus]
c50478.graph_c1	45	25	41	166	177	156	1.67	0.88	1.31	6.24	7.53	6.28	5.18354e-05	2.22828	up	[K]	Transcription	Molecular Function: protein serine/threonine kinase activity (GO:0004674);; Molecular Function: ATP binding (GO:0005524);; Biological Process: protein phosphorylation (GO:0006468);; Cellular Component: integral component of membrane (GO:0016021);;	--	--	--	Protein kinase domain;; Protein tyrosine kinase;; Leucine rich repeat;; Leucine Rich repeats (2 copies);; Leucine Rich Repeat;; Leucine rich repeat N-terminal domain	Putative leucine-rich repeat receptor-like serine/threonine-protein kinase At2g24130 OS=Arabidopsis thaliana OX=3702 GN=At2g24130 PE=3 SV=1	S	Function unknown	PREDICTED: putative leucine-rich repeat receptor-like serine/threonine-protein kinase At2g24130 isoform X2 [Daucus carota subsp. sativus]
c35377.graph_c0	52	71	75	0	0	0	12.16	15.49	17.6	0	0	0	8.41909e-10	-5.86103	down	--	--	Biological Process: response to light stimulus (GO:0009416);; Cellular Component: photosystem I (GO:0009522);; Cellular Component: photosystem II (GO:0009523);; Cellular Component: chloroplast thylakoid membrane (GO:0009535);; Biological Process: photosynthesis, light harvesting in photosystem I (GO:0009768);; Cellular Component: chloroplast envelope (GO:0009941);; Cellular Component: plastoglobu…	K08912|3.44455e-22|gmx:100796326|K08912 light-harvesting complex II chlorophyll a/b binding protein 1 | (RefSeq) chlorophyll a-b binding protein 1D	--	--	--	Chlorophyll a-b binding of LHCII type 1 protein (Fragment) OS=Raphanus sativus OX=3726 PE=2 SV=1	--	--	Chlorophyll a-b binding protein 2, chloroplastic [Dendrobium catenatum]
c47290.graph_c1	328	251	430	105	87	103	17.38	11	22.9	4.27	3.59	5.54	0.00608007	-1.52797	down	--	--	Cellular Component: integral component of membrane (GO:0016021);;	--	--	--	Protein of unknown function (DUF3493)	Photosystem I reaction center subunit IV A, chloroplastic OS=Nicotiana sylvestris OX=4096 GN=PSAEA PE=1 SV=1	S	Function unknown	PREDICTED: protein LOW PSII ACCUMULATION 1, chloroplastic-like [Daucus carota subsp. sativus]
c42528.graph_c1	246	392	294	16	13	38	17.63	24.76	20.58	0.97	0.87	2.84	1.10334e-08	-3.29822	down	--	--	Cellular Component: integral component of membrane (GO:0016021);;	--	--	--	--	Plastidal glycolate/glycerate translocator 1, chloroplastic OS=Arabidopsis thaliana OX=3702 GN=PLGG1 PE=1 SV=1	M	Cell wall/membrane/envelope biogenesis	PREDICTED: plastidal glycolate/glycerate translocator 1, chloroplastic-like [Daucus carota subsp. sativus]
c42405.graph_c0	120	234	204	292	351	1545	7.52	11.3	10.99	14.13	18.55	91.13	0.00911312	2.08038	up	--	--	Cellular Component: integral component of membrane (GO:0016021);;	--	--	--	--	Uncharacterized GPI-anchored protein At5g19250 OS=Arabidopsis thaliana OX=3702 GN=At5g19250 PE=1 SV=1	S	Function unknown	PREDICTED: uncharacterized GPI-anchored protein At5g19250-like [Daucus carota subsp. sativus]
c44008.graph_c0	216	9	41	0	0	0	16.98	0.57	3.03	0	0	0	2.93611e-08	-5.64939	down	--	--	Cellular Component: plastid (GO:0009536);; Cellular Component: integral component of membrane (GO:0016021);;	K03542|2.29055e-74|smo:SELMODRAFT_449583|K03542 photosystem II 22kDa protein | (RefSeq) PsbS1-1; LHC-related protein	--	--	Chlorophyll A-B binding protein	Photosystem II 22 kDa protein, chloroplastic OS=Spinacia oleracea OX=3562 GN=PSBS PE=1 SV=1	I	Lipid transport and metabolism	LHC-related protein [Selaginella moellendorffii]
c36857.graph_c0	210	201	336	977	472	913	19.82	16.18	31.37	86.62	47.65	109.39	0.00160967	1.72737	up	[U]	Intracellular trafficking, secretion, and vesicular transport	Molecular Function: protein serine/threonine kinase activity (GO:0004674);; Molecular Function: calcium ion binding (GO:0005509);; Molecular Function: ATP binding (GO:0005524);; Biological Process: protein phosphorylation (GO:0006468);;	--	[T]	Signal transduction mechanisms	Protein kinase domain;; Protein tyrosine kinase;; Lipopolysaccharide kinase (Kdo/WaaP) family	CDPK-related protein kinase OS=Daucus carota OX=4039 GN=CRK PE=2 SV=1	T	Signal transduction mechanisms	PREDICTED: CDPK-related protein kinase-like [Daucus carota subsp. sativus]
c44638.graph_c1	2718	3170	3946	564	606	800	144.24	148.77	207.28	22.67	30.3	45.22	3.96396e-05	-2.00794	down	[P]	Inorganic ion transport and metabolism	--	K17525|5.7073e-89|nnu:104600333|K17525 chitinase domain-containing protein 1 | (RefSeq) rhodanese-like domain-containing protein 4, chloroplastic	--	--	--	Rhodanese-like domain-containing protein 4, chloroplastic OS=Arabidopsis thaliana OX=3702 GN=STR4 PE=1 SV=2	S	Function unknown	PREDICTED: rhodanese-like domain-containing protein 4, chloroplastic [Daucus carota subsp. sativus]
c47355.graph_c0	105	151	89	381	379	264	4.54	6.99	3.99	16.85	16.98	13.91	0.000570197	1.69695	up	--	--	--	--	[Z]	Cytoskeleton	Interferon-related developmental regulator (IFRD)	--	K	Transcription	PREDICTED: uncharacterized protein LOC108223959 [Daucus carota subsp. sativus]
c38766.graph_c0	1547	1525	1525	4329	10294	4489	95.14	81.69	89.47	223.98	619.68	295.53	8.94803e-05	2.17829	up	[G]	Carbohydrate transport and metabolism	--	K15634|1.55822e-27|sot:102592733|K15634 probable phosphoglycerate mutase [EC:5.4.2.12] | (RefSeq) phosphoglycerate mutase-like protein 4	[G]	Carbohydrate transport and metabolism	Histidine phosphatase superfamily (branch 1)	Phosphoglycerate mutase-like protein 4 OS=Arabidopsis thaliana OX=3702 GN=At3g50520 PE=2 SV=1	G	Carbohydrate transport and metabolism	PREDICTED: metal-independent phosphoserine phosphatase-like isoform X2 [Nicotiana sylvestris]
c35087.graph_c0	43	29	77	241	226	152	16.75	10.97	31.12	76.84	82.67	66.41	0.000567355	2.06614	up	--	--	Molecular Function: DNA binding (GO:0003677);; Cellular Component: nucleus (GO:0005634);; Biological Process: regulation of transcription, DNA-templated (GO:0006355);;	--	--	--	No apical meristem (NAM) protein	Protein FEZ OS=Arabidopsis thaliana OX=3702 GN=FEZ PE=2 SV=1	S	Function unknown	PREDICTED: NAC domain-containing protein 60 [Daucus carota subsp. sativus]
c48809.graph_c0	1222	1722	1466	511	327	323	38.92	45.85	39.94	24.66	14.52	15.82	3.53115e-05	-1.71706	down	[T]	Signal transduction mechanisms	Biological Process: response to reactive oxygen species (GO:0000302);; Molecular Function: nucleic acid binding (GO:0003676);; Molecular Function: GTPase activity (GO:0003924);; Molecular Function: GTP binding (GO:0005525);; Biological Process: translation (GO:0006412);; Cellular Component: chloroplast stroma (GO:0009570);; Biological Process: regulation of gene expression (GO:0010468);; Biologic…	K06207|0|spen:107014339|K06207 GTP-binding protein | (RefSeq) GTP-binding protein TypA/BipA homolog	[J]	Translation, ribosomal structure and biogenesis	Elongation factor Tu GTP binding domain;; Elongation factor G C-terminus;; Elongation factor Tu domain 2;; 50S ribosome-binding GTPase	Putative elongation factor TypA-like SVR3, chloroplastic OS=Arabidopsis thaliana OX=3702 GN=SVR3 PE=1 SV=1	T	Signal transduction mechanisms	PREDICTED: GTP-binding protein TypA/BipA homolog [Daucus carota subsp. sativus]
c48628.graph_c0	1322	864	1820	2128	3545	7981	33.58	18.68	40.48	43.86	78.52	179.35	0.00924828	1.88895	up	--	--	--	--	[R]	General function prediction only	ENT domain;; Late embryogenesis abundant (LEA) group 1	Protein EMSY-LIKE 3 OS=Arabidopsis thaliana OX=3702 GN=EML3 PE=1 SV=1	S	Function unknown	PREDICTED: protein EMSY-LIKE 3 [Daucus carota subsp. sativus]
c37658.graph_c0	102	1	24	0	0	0	9.89	0.09	2.28	0	0	0	5.13096e-05	-4.61206	down	[C]	Energy production and conversion	Molecular Function: plastoquinol--plastocyanin reductase activity (GO:0009496);; Biological Process: photosynthesis (GO:0015979);; Cellular Component: integral component of membrane (GO:0016021);; Cellular Component: thylakoid membrane (GO:0042651);; Molecular Function: electron transporter, transferring electrons within cytochrome b6/f complex of photosystem II activity (GO:0045158);; Molecular …	K02636|4.72153e-85|ppp:PHYPADRAFT_121098|K02636 cytochrome b6-f complex iron-sulfur subunit [EC:1.10.9.1] | (RefSeq) hypothetical protein	[C]	Energy production and conversion	Cytochrome B6-F complex Fe-S subunit;; Rieske [2Fe-2S] domain	Cytochrome b6-f complex iron-sulfur subunit, chloroplastic OS=Oryza sativa subsp. japonica OX=39947 GN=petC PE=1 SV=1	C	Energy production and conversion	hypothetical protein PHYPA_011030 [Physcomitrella patens]
c41465.graph_c1	601	1134	651	1985	2412	1578	50.83	88.18	52.04	151.57	229.15	154.74	0.00455874	1.48426	up	--	--	Biological Process: deadenylation-dependent decapping of nuclear-transcribed mRNA (GO:0000290);; Molecular Function: RNA cap binding (GO:0000339);; Cellular Component: P-body (GO:0000932);; Cellular Component: nucleus (GO:0005634);; Cellular Component: viral nucleocapsid (GO:0019013);;	K12620|5.30077e-40|mtr:MTR_8g021250|K12620 U6 snRNA-associated Sm-like protein LSm1 | (RefSeq) small nuclear ribonucleoprotein	[A]	RNA processing and modification	LSM domain	Sm-like protein LSM1B OS=Arabidopsis thaliana OX=3702 GN=LSM1B PE=1 SV=1	K	Transcription	PREDICTED: sm-like protein LSM1B [Daucus carota subsp. sativus]
c52819.graph_c0	1099	1461	1674	6695	2639	7893	11.67	13.34	17.12	60.04	26.28	86.16	0.000145784	2.09148	up	--	--	Cellular Component: 1,3-beta-D-glucan synthase complex (GO:0000148);; Molecular Function: 1,3-beta-D-glucan synthase activity (GO:0003843);; Biological Process: (1->3)-beta-D-glucan biosynthetic process (GO:0006075);; Cellular Component: integral component of membrane (GO:0016021);;	K11000|0|rcu:8262063|K11000 callose synthase [EC:2.4.1.-] | (RefSeq) callose synthase 12	[M]	Cell wall/membrane/envelope biogenesis	1,3-beta-glucan synthase component;; 1,3-beta-glucan synthase subunit FKS1, domain-1	Callose synthase 12 OS=Arabidopsis thaliana OX=3702 GN=CALS12 PE=2 SV=1	S	Function unknown	PREDICTED: callose synthase 12 [Daucus carota subsp. sativus]
c49134.graph_c0	2506	1449	4438	216	156	276	79.24	39.1	135.86	5.75	4.58	8.89	1.70783e-09	-3.30505	down	[E]	Amino acid transport and metabolism	Molecular Function: glycine hydroxymethyltransferase activity (GO:0004372);; Cellular Component: nucleus (GO:0005634);; Cellular Component: mitochondrion (GO:0005739);; Cellular Component: plasma membrane (GO:0005886);; Biological Process: glycine metabolic process (GO:0006544);; Biological Process: L-serine metabolic process (GO:0006563);; Molecular Function: methyltransferase activity (GO:00081…	K00600|0|gmx:100499635|K00600 glycine hydroxymethyltransferase [EC:2.1.2.1] | (RefSeq) serine hydroxymethyltransferase 5	[E]	Amino acid transport and metabolism	Serine hydroxymethyltransferase	Serine hydroxymethyltransferase 1, mitochondrial OS=Flaveria pringlei OX=4226 PE=2 SV=1	E	Amino acid transport and metabolism	PREDICTED: serine hydroxymethyltransferase 1, mitochondrial [Daucus carota subsp. sativus]
c39206.graph_c0	212	10	54	0	0	0	23.81	0.91	5.95	0	0	0	1.12024e-08	-5.7495	down	--	--	Cellular Component: membrane (GO:0016020);;	--	--	--	Chlorophyll A-B binding protein	Early light-induced protein, chloroplastic OS=Pisum sativum OX=3888 PE=2 SV=1	S	Function unknown	early light-inducible protein [Spirogyra varians]
c35582.graph_c0	524	780	47	17	21	75	31.27	40.94	2.88	0.95	1.18	4.78	0.00161042	-2.78554	down	--	--	Molecular Function: peroxidase activity (GO:0004601);; Cellular Component: extracellular region (GO:0005576);; Biological Process: response to oxidative stress (GO:0006979);; Molecular Function: heme binding (GO:0020037);; Biological Process: hydrogen peroxide catabolic process (GO:0042744);; Molecular Function: metal ion binding (GO:0046872);; Biological Process: oxidation-reduction process (GO:…	K00430|4.68487e-168|vvi:100263665|K00430 peroxidase [EC:1.11.1.7] | (RefSeq) cationic peroxidase 1	--	--	Peroxidase	Cationic peroxidase 1 OS=Arachis hypogaea OX=3818 GN=PNC1 PE=1 SV=2	G	Carbohydrate transport and metabolism	PREDICTED: cationic peroxidase 1-like [Daucus carota subsp. sativus]
c37456.graph_c0	189	35	328	19	20	18	10.98	1.58	19.39	0.92	0.98	1	0.000334233	-2.78948	down	[K]	Transcription	--	--	--	--	Leucine Rich repeats (2 copies);; Leucine rich repeat;; Leucine Rich Repeat;; Leucine Rich repeat	Polygalacturonase inhibitor OS=Vitis vinifera OX=29760 GN=pgip PE=1 SV=1	S	Function unknown	PREDICTED: polygalacturonase inhibitor-like [Daucus carota subsp. sativus]
c51453.graph_c0	436	187	700	29	66	56	18.17	5.88	28.2	1.1	2.88	1.92	6.71875e-05	-2.66745	down	--	--	Molecular Function: serine-type endopeptidase activity (GO:0004252);; Biological Process: proteolysis (GO:0006508);; Cellular Component: integral component of membrane (GO:0016021);;	--	[T]	Signal transduction mechanisms	Rhomboid family	RHOMBOID-like protein 9, chloroplastic OS=Arabidopsis thaliana OX=3702 GN=RBL9 PE=2 SV=1	S	Function unknown	PREDICTED: RHOMBOID-like protein 9, chloroplastic [Daucus carota subsp. sativus]
c43156.graph_c0	3343	5287	6331	2640	1030	1120	111.63	153.04	204.43	74.91	32.28	38.59	0.00608007	-1.49124	down	--	--	Molecular Function: signal transducer activity (GO:0004871);; Cellular Component: nucleus (GO:0005634);; Cellular Component: cytoplasm (GO:0005737);; Biological Process: signal transduction (GO:0007165);; Biological Process: phototropism (GO:0009638);;	--	--	--	NPH3 family;; BTB/POZ domain	Root phototropism protein 2 OS=Arabidopsis thaliana OX=3702 GN=RPT2 PE=1 SV=2	S	Function unknown	PREDICTED: root phototropism protein 2 [Daucus carota subsp. sativus]
c40488.graph_c0	101	87	109	410	218	354	3.06	1.99	1.56	10.4	6.88	9.99	0.000311832	1.80363	up	--	--	--	--	--	--	Transposase family tnp2;; Domain of unknown function (DUF4218);; Domain of unknown function (DUF4216);; Plant transposase (Ptta/En/Spm family);; Transposase family tnp2	--	S	Function unknown	uncharacterized protein LOC112026106 [Quercus suber]
c43596.graph_c1	628	816	1146	5244	4915	8483	14.31	12.83	20.98	101.87	106.82	203.68	3.72453e-09	2.92251	up	[L]	Replication, recombination and repair	Molecular Function: nucleotidase activity (GO:0008252);; Biological Process: dephosphorylation (GO:0016311);;	K03787|6.46485e-49|sot:102581587|K03787 5'-nucleotidase [EC:3.1.3.5] | (RefSeq) 5'-nucleotidase SurE	--	--	Survival protein SurE	--	F	Nucleotide transport and metabolism	hypothetical protein DCAR_002387 [Daucus carota subsp. sativus]
c47683.graph_c0	886	527	996	276	149	175	30.28	15.42	31.69	7.53	4.07	5.61	0.000419942	-1.80587	down	[HT]	Coenzyme transport and metabolism ;; Signal transduction mechanisms	Molecular Function: protein kinase activity (GO:0004672);; Molecular Function: ATP binding (GO:0005524);; Biological Process: protein phosphorylation (GO:0006468);;	--	[R]	General function prediction only	ABC1 family	Protein ACTIVITY OF BC1 COMPLEX KINASE 1, chloroplastic OS=Arabidopsis thaliana OX=3702 GN=ABC1K1 PE=1 SV=1	S	Function unknown	PREDICTED: uncharacterized aarF domain-containing protein kinase At4g31390, chloroplastic [Daucus carota subsp. sativus]
c42150.graph_c1	814	953	1212	3606	5396	4205	57.66	59.76	84.87	221.73	416.57	364.21	2.09203e-06	2.2714	up	--	--	Molecular Function: calcium-transporting ATPase activity (GO:0005388);; Molecular Function: calmodulin binding (GO:0005516);; Molecular Function: ATP binding (GO:0005524);; Cellular Component: integral component of plasma membrane (GO:0005887);; Cellular Component: intracellular membrane-bounded organelle (GO:0043231);; Molecular Function: metal ion binding (GO:0046872);; Biological Process: calc…	K01537|1.84554e-76|sind:105173911|K01537 Ca2+-transporting ATPase [EC:3.6.3.8] | (RefSeq) calcium-transporting ATPase 10, plasma membrane-type	[P]	Inorganic ion transport and metabolism	Ca2+-ATPase N terminal autoinhibitory domain;; Cation transporter/ATPase, N-terminus	Calcium-transporting ATPase 10, plasma membrane-type OS=Arabidopsis thaliana OX=3702 GN=ACA10 PE=1 SV=2	P	Inorganic ion transport and metabolism	PREDICTED: calcium-transporting ATPase 10, plasma membrane-type-like [Daucus carota subsp. sativus]
c40618.graph_c0	51	57	91	327	319	1877	3.1	2.94	5.18	17.15	17.32	134.12	8.71032e-07	3.55102	up	--	--	Biological Process: MAPK cascade (GO:0000165);; Molecular Function: MAP kinase activity (GO:0004707);; Molecular Function: ATP binding (GO:0005524);; Cellular Component: intracellular (GO:0005622);;	K20538|9.27008e-31|cic:CICLE_v10007788mg|K20538 mitogen-activated protein kinase 8 [EC:2.7.11.24] | (RefSeq) hypothetical protein	[T]	Signal transduction mechanisms	--	Mitogen-activated protein kinase 9 OS=Arabidopsis thaliana OX=3702 GN=MPK9 PE=2 SV=2	T	Signal transduction mechanisms	hypothetical protein DCAR_011325 [Daucus carota subsp. sativus]
c41591.graph_c0	296	510	396	76	116	109	19.6	29.56	25.44	4.24	7.2	7.53	0.00357574	-1.66049	down	--	--	Molecular Function: calcium ion binding (GO:0005509);; Molecular Function: protein binding (GO:0005515);; Cellular Component: chloroplast thylakoid lumen (GO:0009543);; Cellular Component: chloroplast stroma (GO:0009570);; Cellular Component: photosystem II oxygen evolving complex (GO:0009654);; Biological Process: photosynthesis (GO:0015979);; Cellular Component: extrinsic component of membrane …	--	--	--	PsbP	PsbP domain-containing protein 6, chloroplastic OS=Arabidopsis thaliana OX=3702 GN=PPD6 PE=1 SV=1	S	Function unknown	PREDICTED: psbP domain-containing protein 6, chloroplastic [Daucus carota subsp. sativus]
c51963.graph_c0	1306	2158	1794	771	317	566	35.07	48.38	44.99	18.58	8.41	15.8	0.00501763	-1.45941	down	--	--	Cellular Component: integral component of membrane (GO:0016021);;	--	--	--	STELLO glycosyltransferases	Probable glycosyltransferase STELLO1 OS=Arabidopsis thaliana OX=3702 GN=STL1 PE=1 SV=1	S	Function unknown	PREDICTED: uncharacterized protein LOC108218052 [Daucus carota subsp. sativus]
c31870.graph_c0	57	61	106	246	450	171	1.91	1.77	3.44	7.01	14.17	5.91	0.0015896	2.01356	up	[C]	Energy production and conversion	--	--	--	--	FAD binding domain;; Berberine and berberine like	Berberine bridge enzyme-like 15 OS=Arabidopsis thaliana OX=3702 GN=MEE23 PE=1 SV=1	C	Energy production and conversion	PREDICTED: cannabidiolic acid synthase-like 1 [Daucus carota subsp. sativus]
c33897.graph_c0	62	75	65	883	379	1531	7.79	8.48	7.92	93.44	45.07	206.66	2.0795e-11	3.75388	up	--	--	--	K17279|2.02248e-21|pper:PRUPE_ppa024704mg|K17279 receptor expression-enhancing protein 5/6 | (RefSeq) hypothetical protein	[U]	Intracellular trafficking, secretion, and vesicular transport	TB2/DP1, HVA22 family	HVA22-like protein c OS=Arabidopsis thaliana OX=3702 GN=HVA22C PE=2 SV=1	U	Intracellular trafficking, secretion, and vesicular transport	PREDICTED: zinc finger RNA-binding protein-like isoform X3 [Daucus carota subsp. sativus]
c33578.graph_c0	271	306	405	2095	576	2547	20.64	20.53	30.05	134.98	41.25	202.46	6.66279e-05	2.41353	up	--	--	--	--	[U]	Intracellular trafficking, secretion, and vesicular transport	--	Protein CYPRO4 OS=Cynara cardunculus OX=4265 GN=CYPRO4 PE=2 SV=1	U	Intracellular trafficking, secretion, and vesicular transport	PREDICTED: protein CYPRO4 [Daucus carota subsp. sativus]
c51814.graph_c0	91	12	64	307	328	846	2.9	0.29	2.59	5.86	6.73	17.88	4.34029e-05	3.03586	up	[T]	Signal transduction mechanisms	Molecular Function: peroxidase activity (GO:0004601);; Molecular Function: calcium ion binding (GO:0005509);; Cellular Component: integral component of membrane (GO:0016021);; Molecular Function: oxidoreductase activity, acting on NAD(P)H, oxygen as acceptor (GO:0050664);; Biological Process: oxidation-reduction process (GO:0055114);; Biological Process: cellular oxidant detoxification (GO:009886…	K13447|0|cic:CICLE_v10018741mg|K13447 respiratory burst oxidase [EC:1.6.3.- 1.11.1.-] | (RefSeq) hypothetical protein	[PQ]	--	Ferric reductase NAD binding domain;; Respiratory burst NADPH oxidase;; FAD-binding domain;; Ferric reductase like transmembrane component;; EF-hand domain	Respiratory burst oxidase homolog protein A OS=Solanum tuberosum OX=4113 GN=RBOHA PE=1 SV=1	U	Intracellular trafficking, secretion, and vesicular transport	PREDICTED: respiratory burst oxidase homolog protein A [Daucus carota subsp. sativus]
c42256.graph_c0	839	977	821	1867	1672	3312	34.86	35.66	32.71	65.27	64.14	141.99	0.00643461	1.54885	up	--	--	--	--	[K]	Transcription	B-box zinc finger;; CCT motif	Zinc finger protein CONSTANS-LIKE 5 OS=Arabidopsis thaliana OX=3702 GN=COL5 PE=2 SV=2	K	Transcription	PREDICTED: zinc finger protein CONSTANS-LIKE 5-like [Daucus carota subsp. sativus]
c32944.graph_c0	60	11	79	5	2	6	3.82	0.61	4.17	0.23	0.15	0.65	0.00234454	-2.85906	down	--	--	--	--	--	--	--	Increased DNA methylation 1 OS=Arabidopsis thaliana OX=3702 GN=IDM1 PE=1 SV=1	S	Function unknown	hypothetical protein DCAR_015648 [Daucus carota subsp. sativus]
c43118.graph_c0	5502	9901	5904	1786	2090	2501	234.87	367.75	244.17	64.63	83.74	110.27	0.00950283	-1.42352	down	--	--	Molecular Function: transporter activity (GO:0005215);; Cellular Component: integral component of membrane (GO:0016021);; Biological Process: carbohydrate transmembrane transport (GO:0034219);;	K15283|0|vvi:100257292|K15283 solute carrier family 35, member E1 | (RefSeq) triose phosphate/phosphate translocator, chloroplastic	[GE]	--	Triose-phosphate Transporter family;; EamA-like transporter family	Triose phosphate/phosphate translocator, chloroplastic OS=Flaveria trinervia OX=4227 GN=TPT PE=2 SV=1	S	Function unknown	PREDICTED: triose phosphate/phosphate translocator, chloroplastic [Daucus carota subsp. sativus]
c43588.graph_c0	806	518	604	47	89	126	35.71	20.07	25.84	1.82	3.72	5.83	3.53115e-05	-2.44435	down	--	--	--	--	--	--	RbcX protein;; RbcX protein	Chaperonin-like RbcX protein 2, chloroplastic OS=Arabidopsis thaliana OX=3702 GN=RBCX2 PE=1 SV=1	S	Function unknown	PREDICTED: uncharacterized protein LOC108227641 [Daucus carota subsp. sativus]
c33574.graph_c0	419	240	147	126	13	21	34.39	17.36	11.75	8.72	1	1.8	0.00835147	-2.13171	down	--	--	--	--	--	--	--	Kiwellin OS=Actinidia deliciosa OX=3627 PE=1 SV=1	S	Function unknown	PREDICTED: kiwellin-like [Daucus carota subsp. sativus]
c41936.graph_c0	205	42	135	2	1	7	9.93	1.89	6.59	0.07	0.04	0.45	3.61046e-08	-4.32881	down	--	--	--	--	--	--	--	Probable membrane-associated kinase regulator 4 OS=Arabidopsis thaliana OX=3702 GN=MAKR4 PE=3 SV=1	S	Function unknown	PREDICTED: probable membrane-associated kinase regulator 4 [Daucus carota subsp. sativus]
c41958.graph_c0	309	71	69	34	9	10	5.55	1.84	1.5	1	0.98	0.75	0.000507372	-2.71429	down	[L]	Replication, recombination and repair	--	K10706|0|spen:107021995|K10706 senataxin [EC:3.6.4.-] | (RefSeq) uncharacterized LOC107021995	[A]	RNA processing and modification	AAA domain;; AAA domain;; AAA domain;; AAA domain;; Viral (Superfamily 1) RNA helicase	Probable helicase MAGATAMA 3 OS=Arabidopsis thaliana OX=3702 GN=MAA3 PE=2 SV=1	L	Replication, recombination and repair	hypothetical protein DCAR_011124 [Daucus carota subsp. sativus]
c38111.graph_c0	76	158	271	40	9	9	22.78	45.04	82.87	9.89	2.53	2.98	6.97913e-05	-2.81766	down	--	--	Cellular Component: membrane (GO:0016020);; Molecular Function: metal ion binding (GO:0046872);;	K16281|8.71273e-50|gra:105802723|K16281 RING-H2 zinc finger protein RHA1 | (RefSeq) E3 ubiquitin-protein ligase RHA1B-like	[O]	Posttranslational modification, protein turnover, chaperones	Ring finger domain;; RING-like zinc finger	Probable E3 ubiquitin-protein ligase RHA1A OS=Arabidopsis thaliana OX=3702 GN=RHA1A PE=2 SV=1	O	Posttranslational modification, protein turnover, chaperones	PREDICTED: E3 ubiquitin-protein ligase RHA1B-like [Daucus carota subsp. sativus]
c52289.graph_c3	805	879	1022	3485	2784	5757	63.61	60.83	80.44	242.17	217.02	502.45	8.36155e-06	2.26811	up	[C]	Energy production and conversion	Cellular Component: integral component of membrane (GO:0016021);;	--	--	--	Sucrase/ferredoxin-like	--	S	Function unknown	PREDICTED: uncharacterized protein LOC108192768 [Daucus carota subsp. sativus]
c33100.graph_c0	382	175	264	92	24	30	15.51	6.17	10.41	3.17	0.91	1.26	0.00019332	-2.29197	down	[S]	Function unknown	--	K07192|0|tcc:TCM_024620|K07192 flotillin | (RefSeq) Flotillin-like protein 2	[UZ]	--	SPFH domain / Band 7 family	Flotillin-like protein 1 OS=Medicago truncatula OX=3880 GN=FLOT1 PE=2 SV=1	S	Function unknown	PREDICTED: flotillin-like protein 3 [Daucus carota subsp. sativus]
c40357.graph_c0	40	46	96	123	187	517	5.51	4.26	13.1	13.63	21.78	68.18	0.00363065	2.23621	up	--	--	Cellular Component: membrane (GO:0016020);;	--	--	--	Cotton fibre expressed protein;; Domain of unknown function (DUF4408)	--	S	Function unknown	hypothetical protein DCAR_008703 [Daucus carota subsp. sativus]
c52355.graph_c0	193	868	108	88	33	61	3.11	12.06	1.68	1.21	0.5	1.01	0.00389578	-2.2427	down	--	--	Molecular Function: binding (GO:0005488);;	K10400|0|vvi:100253712|K10400 kinesin family member 15 | (RefSeq) kinesin-like protein KIN-12F	[Z]	Cytoskeleton	Kinesin motor domain;; Microtubule binding	Kinesin-like protein KIN-12F OS=Arabidopsis thaliana OX=3702 GN=KIN12F PE=3 SV=1	Z	Cytoskeleton	PREDICTED: kinesin-like protein KIN12B isoform X1 [Daucus carota subsp. sativus]
c38601.graph_c0	422	22	123	3	0	0	57.17	2.65	16.4	0.3	0	0	0.00240496	-3.8616	down	[G]	Carbohydrate transport and metabolism	Molecular Function: monooxygenase activity (GO:0004497);; Cellular Component: chloroplast (GO:0009507);; Biological Process: photorespiration (GO:0009853);; Molecular Function: ribulose-bisphosphate carboxylase activity (GO:0016984);; Biological Process: reductive pentose-phosphate cycle (GO:0019253);; Biological Process: oxidation-reduction process (GO:0055114);;	K01602|3.18171e-91|fve:101315253|K01602 ribulose-bisphosphate carboxylase small chain [EC:4.1.1.39] | (RefSeq) ribulose bisphosphate carboxylase small chain, chloroplastic-like	--	--	Ribulose bisphosphate carboxylase, small chain;; Ribulose-1,5-bisphosphate carboxylase small subunit	Ribulose bisphosphate carboxylase small chain, chloroplastic OS=Malus sp. OX=3751 GN=RBCS PE=2 SV=1	C	Energy production and conversion	PREDICTED: ribulose bisphosphate carboxylase small chain, chloroplastic-like [Fragaria vesca subsp. vesca]
c45015.graph_c0	1	5	10	176	13	200	0.01	0.16	0.59	3.46	0.79	3.87	3.54103e-06	3.98005	up	[X]	Mobilome: prophages, transposons	Molecular Function: catalytic activity (GO:0003824);; Biological Process: single-organism metabolic process (GO:0044710);; Molecular Function: metal ion binding (GO:0046872);; Biological Process: nucleic acid metabolic process (GO:0090304);; Molecular Function: organic cyclic compound binding (GO:0097159);; Molecular Function: heterocyclic compound binding (GO:1901363);;	--	[R]	General function prediction only	Reverse transcriptase (RNA-dependent DNA polymerase);; Integrase core domain;; GAG-pre-integrase domain;; gag-polypeptide of LTR copia-type	Retrovirus-related Pol polyprotein from transposon TNT 1-94 OS=Nicotiana tabacum OX=4097 PE=2 SV=1	ADL	--	hypothetical protein GOBAR_AA36262 [Gossypium barbadense]
c40133.graph_c0	108	88	325	3	13	22	9.3	6.64	27.15	0.22	1.06	1.99	0.000120017	-3.07881	down	--	--	Molecular Function: calcium ion binding (GO:0005509);; Cellular Component: photosystem II oxygen evolving complex (GO:0009654);; Biological Process: photosynthesis (GO:0015979);; Cellular Component: extrinsic component of membrane (GO:0019898);;	K08901|6.04189e-83|sind:105156527|K08901 photosystem II oxygen-evolving enhancer protein 3 | (RefSeq) psbQ-like protein 1, chloroplastic	--	--	Oxygen evolving enhancer protein 3 (PsbQ)	Photosynthetic NDH subunit of lumenal location 2, chloroplastic OS=Arabidopsis thaliana OX=3702 GN=PNSL2 PE=1 SV=1	S	Function unknown	PREDICTED: photosynthetic NDH subunit of lumenal location 2, chloroplastic [Daucus carota subsp. sativus]
c43856.graph_c0	2634	3160	2825	7778	8252	5102	120.77	123.25	124.09	312.45	360.67	241.65	0.00192392	1.4307	up	--	--	Cellular Component: integral component of membrane (GO:0016021);; Molecular Function: xyloglucan 6-xylosyltransferase activity (GO:0033843);;	K08238|0|nnu:104598272|K08238 xyloglucan 6-xylosyltransferase [EC:2.4.2.39] | (RefSeq) probable xyloglucan 6-xylosyltransferase 5	[GM]	--	galactosyl transferase GMA12/MNN10 family	Probable xyloglucan 6-xylosyltransferase 3 OS=Arabidopsis thaliana OX=3702 GN=XXT3 PE=2 SV=1	S	Function unknown	PREDICTED: probable xyloglucan 6-xylosyltransferase 5 [Daucus carota subsp. sativus]
c47285.graph_c1	62	62	70	234	171	323	4.2	3.98	4.5	13.54	10.94	22.79	0.000226489	2.01216	up	--	--	Biological Process: cellular lipid metabolic process (GO:0044255);; Molecular Function: carboxylic ester hydrolase activity (GO:0052689);;	--	[R]	General function prediction only	Putative serine esterase (DUF676)	--	S	Function unknown	PREDICTED: putative lipase ROG1 isoform X1 [Daucus carota subsp. sativus]
c43552.graph_c0	159	32	208	12	3	16	9.67	1.69	12.49	0.6	0.18	1.58	0.000118958	-3.10732	down	[V]	Defense mechanisms	Molecular Function: endonuclease activity (GO:0004519);; Biological Process: nucleic acid phosphodiester bond hydrolysis (GO:0090305);;	--	--	--	--	--	V	Defense mechanisms	PREDICTED: uncharacterized protein LOC108227843 [Daucus carota subsp. sativus]
c42185.graph_c0	432	681	976	184	211	175	19.47	26.8	42.72	7.04	8.98	8.95	0.00520178	-1.59695	down	[J]	Translation, ribosomal structure and biogenesis	Molecular Function: nucleotide binding (GO:0000166);; Molecular Function: nucleic acid binding (GO:0003676);;	--	[R]	General function prediction only	RNA recognition motif. (a.k.a. RRM, RBD, or RNP domain)	28 kDa ribonucleoprotein, chloroplastic OS=Spinacia oleracea OX=3562 PE=1 SV=1	S	Function unknown	PREDICTED: 28 kDa ribonucleoprotein, chloroplastic [Daucus carota subsp. sativus]
c49358.graph_c0	456	76	54	32	29	20	17.46	2.53	2.03	1.04	1.07	0.8	0.00470832	-2.39138	down	--	--	--	--	--	--	TCP family transcription factor	Transcription factor TCP2 OS=Arabidopsis thaliana OX=3702 GN=TCP2 PE=1 SV=1	K	Transcription	PREDICTED: transcription factor TCP2 [Daucus carota subsp. sativus]
c40736.graph_c1	169	823	145	9	10	52	11.79	49.46	10.1	0.58	0.71	3.28	0.000136681	-3.15091	down	--	--	--	--	[K]	Transcription	CCT motif	Protein CHLOROPLAST IMPORT APPARATUS 2 OS=Arabidopsis thaliana OX=3702 GN=CIA2 PE=1 SV=1	K	Transcription	PREDICTED: protein CHLOROPLAST IMPORT APPARATUS 2-like [Daucus carota subsp. sativus]
c30843.graph_c0	210	180	235	797	1036	417	19.72	14.98	21.66	63.22	91.43	41.07	0.00031794	1.92552	up	--	--	--	--	--	--	--	--	--	--	hypothetical protein DCAR_006995 [Daucus carota subsp. sativus]
c49540.graph_c0	333	319	124	58	2	27	12.06	9.98	4.33	1.77	0.07	1	0.000470714	-2.75294	down	--	--	--	--	--	--	--	--	S	Function unknown	PREDICTED: uncharacterized protein LOC108208046 [Daucus carota subsp. sativus]
c49997.graph_c0	799	1857	50	102	32	63	21.85	41.52	1.32	2.52	0.9	1.89	0.000186151	-3.12482	down	--	--	Cellular Component: membrane (GO:0016020);; Biological Process: response to stimulus (GO:0050896);;	K08472|8.4773e-77|cit:102630798|K08472 mlo protein | (RefSeq) MLO-like protein 4	--	--	Mlo family;; Mlo family;; Mlo family	MLO-like protein 4 OS=Arabidopsis thaliana OX=3702 GN=MLO4 PE=2 SV=2	D	Cell cycle control, cell division, chromosome partitioning	hypothetical protein DCAR_016596 [Daucus carota subsp. sativus]
c48132.graph_c0	51	126	20	10	1	6	1.56	3.33	0.6	0.27	0.03	0.19	0.00108399	-2.8988	down	--	--	--	--	--	--	--	--	S	Function unknown	PREDICTED: uncharacterized protein LOC108227255 [Daucus carota subsp. sativus]
c34406.graph_c0	28	41	1	2	0	0	2.55	3.31	0.09	0.15	0	0	0.00826129	-3.28638	down	--	--	--	--	--	--	--	--	--	--	hypothetical protein DCAR_008036 [Daucus carota subsp. sativus]
c50126.graph_c0	417	907	22	73	17	62	16.38	30.03	0.81	2.82	0.83	2.68	0.00765598	-2.51954	down	[G]	Carbohydrate transport and metabolism	Cellular Component: integral component of membrane (GO:0016021);; Molecular Function: pectate lyase activity (GO:0030570);; Biological Process: pectin catabolic process (GO:0045490);; Molecular Function: metal ion binding (GO:0046872);;	K01728|0|sind:105158641|K01728 pectate lyase [EC:4.2.2.2] | (RefSeq) probable pectate lyase 8	--	--	Pectate lyase	Probable pectate lyase 15 OS=Arabidopsis thaliana OX=3702 GN=At4g13710 PE=2 SV=1	G	Carbohydrate transport and metabolism	PREDICTED: probable pectate lyase 8 [Daucus carota subsp. sativus]
c37049.graph_c0	789	1570	352	1634	3517	3955	46.67	81.43	20.39	82.65	196.2	244.47	0.00697003	1.91974	up	--	--	--	--	--	--	--	--	S	Function unknown	PREDICTED: uncharacterized protein LOC108208910 [Daucus carota subsp. sativus]
c49296.graph_c0	273	340	205	97	59	55	10.08	11.51	7.76	3.27	2.1	2.23	0.000454608	-1.72883	down	[G]	Carbohydrate transport and metabolism	Biological Process: flavonoid biosynthetic process (GO:0009813);; Cellular Component: intracellular membrane-bounded organelle (GO:0043231);; Biological Process: flavonoid glucuronidation (GO:0052696);; Molecular Function: quercetin 3-O-glucosyltransferase activity (GO:0080043);; Molecular Function: quercetin 7-O-glucosyltransferase activity (GO:0080044);;	--	[GC]	--	UDP-glucoronosyl and UDP-glucosyl transferase	7-deoxyloganetic acid glucosyltransferase OS=Catharanthus roseus OX=4058 GN=UGT709C2 PE=1 SV=1	S	Function unknown	PREDICTED: 7-deoxyloganetic acid glucosyltransferase-like [Daucus carota subsp. sativus]
c30970.graph_c0	27	28	19	284	401	149	2.26	2.07	1.55	20.1	31.53	13.05	1.39653e-10	3.46847	up	--	--	Cellular Component: integral component of membrane (GO:0016021);; Molecular Function: xyloglucan 6-xylosyltransferase activity (GO:0033843);;	K08238|4.53174e-13|zma:103641926|K08238 xyloglucan 6-xylosyltransferase [EC:2.4.2.39] | (RefSeq) GRMZM2G031453; putative glycosyltransferase 2	[GM]	--	--	Xyloglucan 6-xylosyltransferase 2 OS=Arabidopsis thaliana OX=3702 GN=XXT2 PE=1 SV=1	S	Function unknown	PREDICTED: xyloglucan 6-xylosyltransferase 1-like [Daucus carota subsp. sativus]
c46976.graph_c0	270	786	508	120	55	41	12.36	31.32	22.53	4.66	2.36	1.94	2.08482e-06	-2.58962	down	--	--	Biological Process: response to water deprivation (GO:0009414);;	--	--	--	Helix-loop-helix DNA-binding domain	Transcription factor bHLH137 OS=Arabidopsis thaliana OX=3702 GN=BHLH137 PE=1 SV=1	K	Transcription	PREDICTED: transcription factor bHLH137-like [Daucus carota subsp. sativus]
c47703.graph_c0	220	318	129	30	10	19	9.06	11.44	5.31	1.18	0.34	0.77	2.04688e-08	-3.13515	down	--	--	--	--	--	--	--	Rubisco accumulation factor 1.1, chloroplastic OS=Arabidopsis thaliana OX=3702 GN=RAF1.1 PE=1 SV=1	S	Function unknown	PREDICTED: rubisco accumulation factor 1, chloroplastic-like [Daucus carota subsp. sativus]
c41668.graph_c0	1	1	0	27	27	8	0.1	0.07	0	2.31	4.5	1.45	0.000656047	3.67733	up	--	--	--	--	--	--	--	--	--	--	hypothetical protein DCAR_012030 [Daucus carota subsp. sativus]
c51326.graph_c0	637	1070	436	233	98	136	12.22	17.63	8.16	3.78	1.76	2.69	0.000171686	-1.95296	down	[G]	Carbohydrate transport and metabolism	Molecular Function: hydrolase activity, hydrolyzing O-glycosyl compounds (GO:0004553);; Biological Process: carbohydrate metabolic process (GO:0005975);; Biological Process: macromolecule metabolic process (GO:0043170);;	K01214|0|pper:PRUPE_ppa001199mg|K01214 isoamylase [EC:3.2.1.68] | (RefSeq) hypothetical protein	[G]	Carbohydrate transport and metabolism	Carbohydrate-binding module 48 (Isoamylase N-terminal domain);; Alpha amylase, catalytic domain	Isoamylase 2, chloroplastic OS=Arabidopsis thaliana OX=3702 GN=ISA2 PE=1 SV=2	G	Carbohydrate transport and metabolism	PREDICTED: isoamylase 2, chloroplastic [Daucus carota subsp. sativus]
c48713.graph_c0	2444	3022	1972	10023	8044	4866	108.26	111.08	87.23	385.83	356.88	229.09	9.13171e-05	1.72371	up	[N]	Cell motility	Cellular Component: endosome (GO:0005768);; Cellular Component: trans-Golgi network (GO:0005802);; Cellular Component: plasma membrane (GO:0005886);; Cellular Component: integral component of membrane (GO:0016021);; Molecular Function: cellulose synthase (UDP-forming) activity (GO:0016760);;	K20887|0|rcu:8280565|K20887 xyloglucan glycosyltransferase 4 [EC:2.4.1.-] | (RefSeq) xyloglucan glycosyltransferase 4	--	--	Glycosyl transferase family group 2;; Glycosyltransferase like family 2;; Glycosyl transferase family 2;; Glycosyl transferase family 21	Xyloglucan glycosyltransferase 4 OS=Arabidopsis thaliana OX=3702 GN=CSLC4 PE=1 SV=1	M	Cell wall/membrane/envelope biogenesis	PREDICTED: xyloglucan glycosyltransferase 4-like [Daucus carota subsp. sativus]
c51969.graph_c0	209	71	139	952	760	2176	9.78	2.66	6.13	26.83	29.86	83.7	2.31798e-07	3.18961	up	--	--	--	--	[R]	General function prediction only	C2 domain;; C2 domain	Synaptotagmin-3 OS=Arabidopsis thaliana OX=3702 GN=SYT3 PE=2 SV=1	S	Function unknown	PREDICTED: synaptotagmin-3-like isoform X5 [Daucus carota subsp. sativus]
c52266.graph_c0	363	947	85	99	21	60	6.37	13.98	1.46	1.45	0.35	1.04	0.0016566	-2.49624	down	[K]	Transcription	Molecular Function: protein kinase activity (GO:0004672);; Molecular Function: ATP binding (GO:0005524);; Biological Process: protein phosphorylation (GO:0006468);; Cellular Component: integral component of membrane (GO:0016021);;	--	--	--	Leucine rich repeat;; Leucine Rich repeats (2 copies);; Protein tyrosine kinase;; Protein kinase domain;; Leucine Rich Repeat;; Leucine Rich repeat;; Leucine rich repeat N-terminal domain	Probable LRR receptor-like serine/threonine-protein kinase At4g20940 OS=Arabidopsis thaliana OX=3702 GN=At4g20940 PE=1 SV=1	S	Function unknown	PREDICTED: probable LRR receptor-like serine/threonine-protein kinase At4g20940 [Daucus carota subsp. sativus]
c49862.graph_c0	781	649	1017	2517	2367	2865	20.85	14.62	25.47	58.24	59.44	79.4	0.000249735	1.78424	up	--	--	Biological Process: cellular protein modification process (GO:0006464);; Biological Process: protein transport (GO:0015031);;	K12183|3.45391e-157|jcu:105631279|K12183 ESCRT-I complex subunit TSG101 | (RefSeq) protein ELC-like	[OU]	--	UEV domain;; Vps23 core domain	Protein ELC OS=Arabidopsis thaliana OX=3702 GN=ELC PE=1 SV=1	U	Intracellular trafficking, secretion, and vesicular transport	protein ELC-like [Lactuca sativa]
c48558.graph_c0	131	529	59	56	25	36	3.67	13.23	1.74	1.41	0.62	1.45	0.00669879	-2.1761	down	--	--	Molecular Function: microtubule motor activity (GO:0003777);; Molecular Function: ATP binding (GO:0005524);; Cellular Component: kinesin complex (GO:0005871);; Cellular Component: microtubule (GO:0005874);; Biological Process: microtubule-based movement (GO:0007018);; Molecular Function: microtubule binding (GO:0008017);; Molecular Function: ATPase activity (GO:0016887);;	K10398|0|sot:102582662|K10398 kinesin family member 11 | (RefSeq) kinesin-II 95 kDa subunit	[Z]	Cytoskeleton	Kinesin motor domain;; Microtubule binding	Kinesin-like protein KIN-10A OS=Arabidopsis thaliana OX=3702 GN=KIN10A PE=1 SV=1	Z	Cytoskeleton	PREDICTED: kinesin-like protein KIF22 [Daucus carota subsp. sativus]
c48786.graph_c0	445	203	387	23	10	16	14.48	5.81	12.93	0.62	0.34	0.56	1.01336e-13	-4.01078	down	[K]	Transcription	Biological Process: RNA biosynthetic process (GO:0032774);;	K03093|1.28054e-142|sind:105164704|K03093 RNA polymerase sigma factor | (RefSeq) RNA polymerase sigma factor sigC	--	--	Sigma-70 region 2;; Sigma-70, region 4	RNA polymerase sigma factor sigC OS=Arabidopsis thaliana OX=3702 GN=SIGC PE=2 SV=1	K	Transcription	PREDICTED: RNA polymerase sigma factor sigC [Daucus carota subsp. sativus]
c51642.graph_c0	297	191	339	1107	902	657	10.87	6.27	11.9	31.61	29.64	22.84	0.000413929	1.7536	up	--	--	--	--	--	--	FBD	Putative F-box/LRR-repeat protein At3g18150 OS=Arabidopsis thaliana OX=3702 GN=At3g18150 PE=4 SV=2	S	Function unknown	PREDICTED: putative F-box protein At1g49610 [Daucus carota subsp. sativus]
c42586.graph_c0	55	19	150	3	3	1	2.87	0.87	6.24	0.12	0.14	0.04	3.63239e-06	-4.04529	down	--	--	--	--	--	--	B3 DNA binding domain	B3 domain-containing protein At2g36080 OS=Arabidopsis thaliana OX=3702 GN=ARF31 PE=2 SV=1	K	Transcription	PREDICTED: B3 domain-containing protein At2g36080-like isoform X1 [Daucus carota subsp. sativus]
c30348.graph_c0	156	10	17	0	0	0	13.4	0.76	1.43	0	0	0	8.27919e-07	-5.21046	down	[P]	Inorganic ion transport and metabolism	--	--	--	--	Ferritin-like domain	Desiccation-related protein PCC13-62 OS=Craterostigma plantagineum OX=4153 PE=2 SV=1	S	Function unknown	hypothetical protein KFL_000120030 [Klebsormidium nitens]
c42718.graph_c0	176	276	156	1073	1016	1520	11.72	15.99	10.26	62.31	64.79	106.27	1.11067e-08	2.69223	up	--	--	--	--	[K]	Transcription	--	--	S	Function unknown	PREDICTED: uncharacterized protein LOC108216515 [Daucus carota subsp. sativus]
c40782.graph_c0	89	100	119	36	15	22	3.24	3.04	4.18	1.06	0.51	0.83	0.00306264	-1.83675	down	--	--	Cellular Component: membrane (GO:0016020);;	--	--	--	--	Protein PHLOEM PROTEIN 2-LIKE A10 OS=Arabidopsis thaliana OX=3702 GN=PP2A10 PE=2 SV=1	S	Function unknown	PREDICTED: protein PHLOEM PROTEIN 2-LIKE A10-like [Daucus carota subsp. sativus]
c44858.graph_c0	307	188	113	74	19	29	12.62	6.76	4.5	2.63	0.72	1.3	0.00152896	-2.08633	down	--	--	--	--	--	--	ZF-HD protein dimerisation region	Zinc-finger homeodomain protein 9 OS=Arabidopsis thaliana OX=3702 GN=ZHD9 PE=1 SV=1	S	Function unknown	PREDICTED: LOW QUALITY PROTEIN: zinc-finger homeodomain protein 9 [Daucus carota subsp. sativus]
c52539.graph_c0	342	217	316	121	45	32	9.38	4.66	8.13	2.82	1.06	0.87	0.000788975	-1.97863	down	[R]	General function prediction only	Molecular Function: binding (GO:0005488);; Biological Process: cellular process (GO:0009987);; Molecular Function: kinase activity (GO:0016301);;	K04733|0|gra:105765969|K04733 interleukin-1 receptor-associated kinase 4 [EC:2.7.11.1] | (RefSeq) putative receptor protein kinase ZmPK1	--	--	Protein kinase domain;; Protein tyrosine kinase;; D-mannose binding lectin;; S-locus glycoprotein domain	Putative receptor protein kinase ZmPK1 OS=Zea mays OX=4577 GN=PK1 PE=2 SV=2	T	Signal transduction mechanisms	PREDICTED: putative receptor protein kinase ZmPK1 [Daucus carota subsp. sativus]
c49772.graph_c1	68	78	246	640	564	1177	7.97	8.17	29.53	65.68	64.52	143.8	0.000107999	2.5862	up	--	--	Molecular Function: DNA binding (GO:0003677);;	K09422|6.39128e-43|aip:107618656|K09422 myb proto-oncogene protein, plant | (RefSeq) transcription factor MYB86-like	[K]	Transcription	Myb-like DNA-binding domain	Transcription factor MYB86 OS=Arabidopsis thaliana OX=3702 GN=MYB86 PE=2 SV=1	K	Transcription	transcription factor MYB86-like [Arachis ipaensis]
c17788.graph_c0	78	22	79	185	394	189	10.06	2.55	10.03	20.18	47.74	25.85	0.00329426	2.1191	up	--	--	--	--	--	--	--	--	S	Function unknown	PREDICTED: uncharacterized protein LOC108207942 [Daucus carota subsp. sativus]
c36565.graph_c0	142	93	349	26	8	21	5.11	2.37	8.81	1.06	0.18	0.51	1.09697e-05	-3.00908	down	[T]	Signal transduction mechanisms	--	K04733|4.33705e-176|pmum:103325720|K04733 interleukin-1 receptor-associated kinase 4 [EC:2.7.11.1] | (RefSeq) G-type lectin S-receptor-like serine/threonine-protein kinase At1g67520	--	--	D-mannose binding lectin;; Protein tyrosine kinase;; Protein kinase domain;; Protein tyrosine kinase;; Protein kinase domain;; Domain of unknown function (DUF3403)	G-type lectin S-receptor-like serine/threonine-protein kinase B120 OS=Arabidopsis thaliana OX=3702 GN=B120 PE=2 SV=1	T	Signal transduction mechanisms	PREDICTED: G-type lectin S-receptor-like serine/threonine-protein kinase CES101 [Daucus carota subsp. sativus]
c37926.graph_c0	36	19	93	308	591	524	3	1.75	6.48	19.95	44.03	50.01	1.29099e-06	3.18451	up	--	--	--	--	[S]	Function unknown	--	--	S	Function unknown	PREDICTED: uncharacterized protein LOC108218896 isoform X2 [Daucus carota subsp. sativus]
c30372.graph_c1	632	425	507	1867	1987	1407	37.57	22.16	29.28	94.06	110.91	86.89	5.51643e-05	1.85919	up	[R]	General function prediction only	--	--	--	--	VWA / Hh protein intein-like	--	S	Function unknown	PREDICTED: uncharacterized protein sll0103-like [Daucus carota subsp. sativus]
c48761.graph_c0	157	144	150	62	36	35	6.32	4.33	5.73	1.78	1.54	1.55	0.00470971	-1.55414	down	--	--	Molecular Function: double-stranded DNA binding (GO:0003690);; Cellular Component: mitochondrion (GO:0005739);; Biological Process: regulation of transcription, DNA-templated (GO:0006355);;	K15032|0|fve:101293573|K15032 mTERF domain-containing protein, mitochondrial | (RefSeq) uncharacterized LOC101293573	[KR]	--	mTERF	Transcription termination factor MTERF9, chloroplastic OS=Arabidopsis thaliana OX=3702 GN=MTERF9 PE=2 SV=1	S	Function unknown	PREDICTED: transcription termination factor MTERF9, chloroplastic [Daucus carota subsp. sativus]
c28048.graph_c0	74	37	71	169	298	289	16.29	7.56	15.64	31.08	61.6	69.17	0.000517195	2.14437	up	--	--	--	--	--	--	--	--	--	--	PREDICTED: dehydration-responsive element-binding protein 1B-like [Daucus carota subsp. sativus]
c45044.graph_c0	401	241	284	548	1071	1430	32.87	9.21	15.77	24.08	40.48	60.12	0.00331446	1.86945	up	[E]	Amino acid transport and metabolism	Cellular Component: integral component of membrane (GO:0016021);; Molecular Function: hydrolase activity (GO:0016787);;	--	[I]	Lipid transport and metabolism	alpha/beta hydrolase fold;; Alpha/beta hydrolase family;; Serine aminopeptidase, S33	--	S	Function unknown	PREDICTED: putative aminoacrylate hydrolase RutD [Daucus carota subsp. sativus]
c52875.graph_c0	480	469	461	1398	881	1130	13.82	10.96	11.91	29.19	26.46	27.1	0.00178947	1.39531	up	[K]	Transcription	Molecular Function: protein kinase activity (GO:0004672);; Molecular Function: ATP binding (GO:0005524);; Biological Process: protein phosphorylation (GO:0006468);; Cellular Component: integral component of membrane (GO:0016021);;	--	--	--	Protein kinase domain;; Protein tyrosine kinase;; Di-glucose binding within endoplasmic reticulum;; Leucine Rich repeats (2 copies);; Leucine rich repeat	Probable LRR receptor-like serine/threonine-protein kinase RFK1 OS=Arabidopsis thaliana OX=3702 GN=RKF1 PE=1 SV=1	S	Function unknown	PREDICTED: probable LRR receptor-like serine/threonine-protein kinase RFK1 isoform X1 [Daucus carota subsp. sativus]
c50122.graph_c0	363	604	524	179	107	147	11.81	16.67	14.4	4.23	3.8	4.49	0.00189043	-1.54917	down	--	--	--	K17710|0|vvi:100267944|K17710 pentatricopeptide repeat domain-containing protein 1 | (RefSeq) pentatricopeptide repeat-containing protein At5g25630	[R]	General function prediction only	PPR repeat family;; PPR repeat;; Pentatricopeptide repeat domain;; PPR repeat;; Pentacotripeptide-repeat region of PRORP;; Mitochondrial ATPase expression	Pentatricopeptide repeat-containing protein At5g25630 OS=Arabidopsis thaliana OX=3702 GN=At5g25630 PE=2 SV=2	S	Function unknown	PREDICTED: pentatricopeptide repeat-containing protein At5g25630-like [Daucus carota subsp. sativus]
c50818.graph_c0	315	618	230	189	58	75	4.01	6.76	2.82	2.05	0.69	0.98	0.00964687	-1.64353	down	--	--	--	--	--	--	N-terminal C2 in EEIG1 and EHBP1 proteins	--	S	Function unknown	PREDICTED: myosin-2 heavy chain-like isoform X1 [Daucus carota subsp. sativus]
c43590.graph_c0	1101	1535	1310	43	88	81	41.11	49.73	46.77	1.68	3.05	3.11	2.67034e-14	-3.74531	down	[C]	Energy production and conversion	Molecular Function: aldehyde dehydrogenase (NAD) activity (GO:0004029);; Molecular Function: succinate-semialdehyde dehydrogenase (NAD+) activity (GO:0004777);; Cellular Component: cytosol (GO:0005829);; Molecular Function: glyceraldehyde-3-phosphate dehydrogenase (NADP+) (non-phosphorylating) activity (GO:0008886);; Molecular Function: succinate-semialdehyde dehydrogenase [NAD(P)+] activity (GO:…	K00131|0|thj:104803898|K00131 glyceraldehyde-3-phosphate dehydrogenase (NADP+) [EC:1.2.1.9] | (RefSeq) NADP-dependent glyceraldehyde-3-phosphate dehydrogenase-like	[C]	Energy production and conversion	Aldehyde dehydrogenase family	NADP-dependent glyceraldehyde-3-phosphate dehydrogenase OS=Apium graveolens OX=4045 PE=1 SV=1	C	Energy production and conversion	PREDICTED: NADP-dependent glyceraldehyde-3-phosphate dehydrogenase [Daucus carota subsp. sativus]
c35768.graph_c0	243	298	588	34	1	7	18.11	19.55	42.69	2.14	0.07	0.54	1.81452e-09	-4.26352	down	--	--	--	--	--	--	Protein of unknown function (DUF640)	Protein LIGHT-DEPENDENT SHORT HYPOCOTYLS 4 OS=Arabidopsis thaliana OX=3702 GN=LSH4 PE=1 SV=1	S	Function unknown	PREDICTED: protein LIGHT-DEPENDENT SHORT HYPOCOTYLS 4-like [Daucus carota subsp. sativus]
c46317.graph_c0	942	822	596	250	63	144	40.11	28.55	22.98	10.34	2.64	5.86	6.75098e-05	-2.14866	down	--	--	Biological Process: metabolic process (GO:0008152);; Molecular Function: hydroquinone glucosyltransferase activity (GO:0050505);;	K08237|0|sot:102602649|K08237 hydroquinone glucosyltransferase [EC:2.4.1.218] | (RefSeq) hydroquinone glucosyltransferase-like	[GC]	--	UDP-glucoronosyl and UDP-glucosyl transferase	Hydroquinone glucosyltransferase OS=Rauvolfia serpentina OX=4060 GN=AS PE=1 SV=1	S	Function unknown	PREDICTED: hydroquinone glucosyltransferase-like [Daucus carota subsp. sativus]
c47561.graph_c0	166	177	136	493	269	497	4.21	4.08	3.85	9.34	6.57	12.35	0.00381435	1.51569	up	--	--	Molecular Function: DNA binding (GO:0003677);; Cellular Component: nucleus (GO:0005634);; Biological Process: regulation of transcription, DNA-templated (GO:0006355);;	--	--	--	--	NAC domain-containing protein 73 OS=Arabidopsis thaliana OX=3702 GN=NAC073 PE=2 SV=1	S	Function unknown	PREDICTED: NAC domain-containing protein 73-like [Daucus carota subsp. sativus]
c50451.graph_c0	2653	2459	4561	11556	9765	14416	60.17	48.1	99.8	223.04	207.75	336.33	0.000136353	1.98206	up	[D]	Cell cycle control, cell division, chromosome partitioning	Molecular Function: ubiquitin-protein transferase activity (GO:0004842);; Cellular Component: nucleus (GO:0005634);; Cellular Component: cytoplasm (GO:0005737);; Biological Process: protein ubiquitination (GO:0016567);; Molecular Function: transmembrane receptor protein serine/threonine kinase binding (GO:0070696);;	--	[S]	Function unknown	Armadillo/beta-catenin-like repeat;; U-box domain;; HEAT repeats	U-box domain-containing protein 14 OS=Arabidopsis thaliana OX=3702 GN=PUB14 PE=1 SV=1	S	Function unknown	PREDICTED: U-box domain-containing protein 14 [Daucus carota subsp. sativus]
c36037.graph_c0	111	117	139	1	3	6	10.11	9.38	10.6	0.15	0.48	0.47	5.08827e-11	-4.43675	down	--	--	Cellular Component: chloroplast (GO:0009507);; Cellular Component: thylakoid lumen (GO:0031977);;	--	--	--	--	Thylakoid lumenal 17.9 kDa protein, chloroplastic OS=Arabidopsis thaliana OX=3702 GN=At4g24930 PE=1 SV=1	S	Function unknown	PREDICTED: thylakoid lumenal 17.9 kDa protein, chloroplastic [Daucus carota subsp. sativus]
c48396.graph_c1	188	74	42	16	3	8	4.61	1.57	1.01	0.33	0.07	0.2	9.20422e-05	-3.01931	down	[K]	Transcription	Biological Process: activation of MAPKK activity (GO:0000186);; Molecular Function: MAP kinase kinase kinase activity (GO:0004709);; Molecular Function: ATP binding (GO:0005524);; Cellular Component: intracellular (GO:0005622);; Cellular Component: integral component of membrane (GO:0016021);; Molecular Function: 2-alkenal reductase [NAD(P)] activity (GO:0032440);; Biological Process: oxidation-r…	--	--	--	Protein tyrosine kinase;; Protein kinase domain;; Leucine Rich repeats (2 copies);; Leucine rich repeat;; Leucine rich repeat N-terminal domain	Probable leucine-rich repeat receptor-like protein kinase At5g49770 OS=Arabidopsis thaliana OX=3702 GN=At5g49770 PE=2 SV=1	S	Function unknown	hypothetical protein DCAR_003264 [Daucus carota subsp. sativus]
c41216.graph_c0	2566	3922	3576	803	941	961	177.96	238.9	241.31	47.12	61.26	69.41	0.00108675	-1.6041	down	--	--	--	--	--	--	--	Light-harvesting complex-like protein 3 isotype 2, chloroplastic OS=Arabidopsis thaliana OX=3702 GN=LIL3.2 PE=1 SV=1	S	Function unknown	PREDICTED: uncharacterized protein LOC108210128 [Daucus carota subsp. sativus]
c44032.graph_c0	983	1313	1626	537	228	408	33.68	37.97	53.64	16.36	8.13	13.7	0.0037928	-1.53558	down	[R]	General function prediction only	--	--	[G]	Carbohydrate transport and metabolism	NAD(P)H-binding;; NmrA-like family;; Complex I intermediate-associated protein 30 (CIA30);; NAD dependent epimerase/dehydratase family	--	GM	--	PREDICTED: uncharacterized protein LOC108199867 [Daucus carota subsp. sativus]
c42688.graph_c0	277	86	372	41	42	52	18.38	5.26	24.53	2.22	2.62	3.44	0.00320667	-2.08933	down	[S]	Function unknown	--	--	--	--	Uncharacterized protein family, UPF0114	--	S	Function unknown	PREDICTED: uncharacterized protein LOC108200760 [Daucus carota subsp. sativus]
c49400.graph_c0	2787	6157	5068	12865	19476	12158	277.34	573.49	572.98	1270.44	1846.86	1227.25	0.000840631	1.81044	up	[G]	Carbohydrate transport and metabolism	Molecular Function: hydrolase activity, hydrolyzing O-glycosyl compounds (GO:0004553);; Cellular Component: cell wall (GO:0005618);; Biological Process: xyloglucan metabolic process (GO:0010411);; Molecular Function: xyloglucan:xyloglucosyl transferase activity (GO:0016762);; Biological Process: cell wall biogenesis (GO:0042546);; Cellular Component: apoplast (GO:0048046);; Biological Process: ce…	K08235|3.29146e-152|sind:105165569|K08235 xyloglucan:xyloglucosyl transferase [EC:2.4.1.207] | (RefSeq) xyloglucan endotransglucosylase/hydrolase protein 24-like	--	--	Glycosyl hydrolases family 16;; Xyloglucan endo-transglycosylase (XET) C-terminus	Xyloglucan endotransglucosylase/hydrolase protein 15 OS=Arabidopsis thaliana OX=3702 GN=XTH15 PE=1 SV=1	G	Carbohydrate transport and metabolism	PREDICTED: xyloglucan endotransglucosylase/hydrolase 2-like [Daucus carota subsp. sativus]
c46425.graph_c2	261	97	135	18	21	25	6.24	2	3.14	0.37	0.47	0.62	6.89855e-05	-2.53916	down	--	--	Cellular Component: cytoplasm (GO:0005737);; Molecular Function: oxidoreductase activity, acting on single donors with incorporation of molecular oxygen, incorporation of two atoms of oxygen (GO:0016702);; Biological Process: oxylipin biosynthetic process (GO:0031408);; Molecular Function: metal ion binding (GO:0046872);; Biological Process: oxidation-reduction process (GO:0055114);;	K15718|0|vvi:100232917|K15718 linoleate 9S-lipoxygenase [EC:1.13.11.58] | (RefSeq) LOX, LOX1, LOXC; lipoxygenase	--	--	Lipoxygenase;; PLAT/LH2 domain;; Lipoxygenase	Probable linoleate 9S-lipoxygenase 5 OS=Solanum tuberosum OX=4113 GN=LOX1.5 PE=2 SV=1	S	Function unknown	PREDICTED: probable linoleate 9S-lipoxygenase 5 [Daucus carota subsp. sativus]
c47340.graph_c1	427	194	514	1720	713	1168	9.04	3.37	10.3	30.57	13.9	26.02	0.00612461	1.67119	up	--	--	--	--	--	--	B3 DNA binding domain;; CW-type Zinc Finger	B3 domain-containing protein Os07g0563300 OS=Oryza sativa subsp. japonica OX=39947 GN=Os07g0563300 PE=3 SV=2	K	Transcription	PREDICTED: B3 domain-containing protein Os07g0563300-like isoform X3 [Daucus carota subsp. sativus]
c35444.graph_c0	62	5	9	0	0	0	3.12	0.94	0.54	0	0	0	0.000337215	-4.22104	down	--	--	--	--	--	--	Rhodanese-like domain	Calcium sensing receptor, chloroplastic OS=Arabidopsis thaliana OX=3702 GN=CAS PE=1 SV=1	S	Function unknown	putative arsenate reductase [Pteris vittata]
c48395.graph_c0	398	400	504	28	23	26	17.55	15.11	20.32	1.15	0.9	1.11	1.70003e-16	-3.73172	down	--	--	Molecular Function: metal ion binding (GO:0046872);;	--	[R]	General function prediction only	Zinc finger C-x8-C-x5-C-x3-H type (and similar)	Zinc finger CCCH domain-containing protein ZFN-like OS=Pisum sativum OX=3888 PE=2 SV=1	S	Function unknown	PREDICTED: zinc finger CCCH domain-containing protein ZFN-like [Daucus carota subsp. sativus]
c49315.graph_c0	15	12	19	136	22	65	1.76	0.26	0.56	2.88	0.51	1.48	0.00805951	2.10755	up	--	--	--	--	--	--	--	--	--	--	hypothetical protein RhiirA1_481423 [Rhizophagus irregularis]
c52562.graph_c0	70	253	19	21	2	11	1.02	3.91	0.26	0.6	0.14	0.16	0.00356755	-2.7127	down	--	--	Cellular Component: nucleus (GO:0005634);; Biological Process: mitotic chromosome condensation (GO:0007076);; Biological Process: cell division (GO:0051301);;	K06677|0|vvi:100855284|K06677 condensin complex subunit 1 | (RefSeq) condensin complex subunit 1	[BD]	--	non-SMC mitotic condensation complex subunit 1;; non-SMC mitotic condensation complex subunit 1, N-term;; HEAT repeat	--	BD	--	PREDICTED: condensin complex subunit 1 isoform X1 [Daucus carota subsp. sativus]
c43714.graph_c0	1821	954	1803	145	181	154	78.98	36.08	75.82	5.34	7.38	6.92	2.72475e-09	-2.91224	down	--	--	Cellular Component: integral component of membrane (GO:0016021);;	--	--	--	CAAX protease self-immunity	--	S	Function unknown	PREDICTED: uncharacterized protein LOC108210161 [Daucus carota subsp. sativus]
c49838.graph_c0	1031	1800	1684	4369	5346	8626	31.19	49.88	53.3	128.41	165.89	322.5	6.75098e-05	2.16694	up	--	--	Molecular Function: protein disulfide isomerase activity (GO:0003756);; Cellular Component: endoplasmic reticulum (GO:0005783);; Cellular Component: integral component of membrane (GO:0016021);; Molecular Function: oxidoreductase activity, acting on a sulfur group of donors, disulfide as acceptor (GO:0016671);; Biological Process: oxidation-reduction process (GO:0055114);;	K10950|3.34686e-112|sot:102578203|K10950 ERO1-like protein alpha [EC:1.8.4.-] | (RefSeq) endoplasmic reticulum oxidoreductin-1	[OU]	--	Endoplasmic Reticulum Oxidoreductin 1 (ERO1);; Endoplasmic Reticulum Oxidoreductin 1 (ERO1)	Endoplasmic reticulum oxidoreductin-1 OS=Arabidopsis thaliana OX=3702 GN=AERO1 PE=1 SV=1	OU	--	PREDICTED: endoplasmic reticulum oxidoreductin-1-like [Daucus carota subsp. sativus]
c42438.graph_c0	463	633	433	2428	1558	1971	16.16	17.99	13.99	69.84	55.22	88.17	3.04974e-07	2.07628	up	[L]	Replication, recombination and repair	Molecular Function: damaged DNA binding (GO:0003684);; Biological Process: base-excision repair (GO:0006284);; Biological Process: nucleotide-excision repair (GO:0006289);; Molecular Function: zinc ion binding (GO:0008270);; Molecular Function: oxidized purine nucleobase lesion DNA N-glycosylase activity (GO:0008534);;	K10563|9.85222e-112|sly:101258844|K10563 formamidopyrimidine-DNA glycosylase [EC:3.2.2.23 4.2.99.18] | (RefSeq) formamidopyrimidine-DNA glycosylase	--	--	Formamidopyrimidine-DNA glycosylase N-terminal domain;; Formamidopyrimidine-DNA glycosylase H2TH domain	Formamidopyrimidine-DNA glycosylase OS=Arabidopsis thaliana OX=3702 GN=FPG1 PE=1 SV=1	L	Replication, recombination and repair	hypothetical protein DCAR_025523 [Daucus carota subsp. sativus]
c36186.graph_c1	7507	6330	13668	1413	1777	1923	1500.73	1245.2	2635.9	236.8	340.76	410.18	0.000117435	-2.10415	down	--	--	Biological Process: response to light stimulus (GO:0009416);; Cellular Component: photosystem I (GO:0009522);; Cellular Component: photosystem II (GO:0009523);; Cellular Component: chloroplast thylakoid membrane (GO:0009535);; Biological Process: photosynthesis, light harvesting in photosystem I (GO:0009768);; Cellular Component: chloroplast envelope (GO:0009941);; Cellular Component: plastoglobu…	K08913|1.13434e-57|fve:101293466|K08913 light-harvesting complex II chlorophyll a/b binding protein 2 | (RefSeq) chlorophyll a-b binding protein 151, chloroplastic	--	--	Chlorophyll A-B binding protein	Chlorophyll a-b binding protein, chloroplastic (Fragment) OS=Silene latifolia subsp. alba OX=52853 PE=2 SV=2	J	Translation, ribosomal structure and biogenesis	chlorophyll a/b binding protein [Panax ginseng]
c48610.graph_c0	3625	2282	3733	8503	7943	7220	164.78	88.38	160.7	305.68	323.97	320.08	0.00555063	1.41228	up	--	--	Cellular Component: plasma membrane (GO:0005886);; Cellular Component: integral component of membrane (GO:0016021);; Biological Process: negative regulation of plant-type hypersensitive response (GO:0034051);;	K19363|5.79396e-34|sot:102606262|K19363 lipopolysaccharide-induced tumor necrosis factor-alpha factor | (RefSeq) uncharacterized LOC102606262	--	--	LITAF-like zinc ribbon domain	GSH-induced LITAF domain protein OS=Arabidopsis thaliana OX=3702 GN=GILP PE=1 SV=1	S	Function unknown	PREDICTED: uncharacterized protein LOC108197364 [Daucus carota subsp. sativus]
c43524.graph_c0	31	160	27	11	11	6	1.01	4.54	0.91	0.33	0.4	0.19	0.00724809	-2.38591	down	[E]	Amino acid transport and metabolism	--	--	[E]	Amino acid transport and metabolism	Amino acid permease;; Amino acid permease;; Spore germination protein;; C-terminus of AA_permease	Cationic amino acid transporter 6, chloroplastic OS=Arabidopsis thaliana OX=3702 GN=CAT6 PE=2 SV=1	E	Amino acid transport and metabolism	PREDICTED: cationic amino acid transporter 6, chloroplastic-like [Daucus carota subsp. sativus]
c42311.graph_c0	3384	4123	4875	13930	9513	8455	154.77	155.73	217.79	500.67	435.49	388.79	0.000960232	1.46271	up	[P]	Inorganic ion transport and metabolism	Cellular Component: integral component of plasma membrane (GO:0005887);; Molecular Function: ammonium transmembrane transporter activity (GO:0008519);; Biological Process: organic cation transport (GO:0015695);; Biological Process: nitrogen utilization (GO:0019740);; Biological Process: ammonium transmembrane transport (GO:0072488);;	K03320|0|pper:PRUPE_ppa004845mg|K03320 ammonium transporter, Amt family | (RefSeq) hypothetical protein	[P]	Inorganic ion transport and metabolism	Ammonium Transporter Family	Ammonium transporter 3 member 1 OS=Oryza sativa subsp. japonica OX=39947 GN=AMT3-1 PE=2 SV=1	P	Inorganic ion transport and metabolism	PREDICTED: ammonium transporter 2-like [Daucus carota subsp. sativus]
c46665.graph_c0	512	473	856	3152	3286	5220	24.92	20.91	44.63	146.15	164.41	292.04	1.17446e-07	2.73454	up	--	--	Cellular Component: integral component of membrane (GO:0016021);;	--	--	--	--	--	S	Function unknown	PREDICTED: TVP38/TMEM64 family membrane protein slr0305-like [Daucus carota subsp. sativus]
c42928.graph_c0	402	1165	510	120	127	117	14.1	35.45	17.3	3.6	4.18	4.26	8.58296e-05	-2.1536	down	[J]	Translation, ribosomal structure and biogenesis	Biological Process: cellular process (GO:0009987);; Cellular Component: membrane (GO:0016020);; Molecular Function: transferase activity, transferring glycosyl groups (GO:0016757);;	--	--	--	Cellulose synthase;; Ribosomal protein S6	Cellulose synthase-like protein G3 OS=Arabidopsis thaliana OX=3702 GN=CSLG3 PE=2 SV=2	--	--	PREDICTED: cellulose synthase-like protein G3 isoform X1 [Daucus carota subsp. sativus]
c47180.graph_c0	598	592	750	1756	1466	2268	21.84	17.79	24.26	44.4	42.71	73.78	0.00113698	1.63959	up	--	--	--	--	--	--	Zinc finger, C3HC4 type (RING finger);; Prokaryotic RING finger family 4;; Ankyrin repeats (many copies);; Ankyrin repeat	Probable E3 ubiquitin-protein ligase XBOS34 OS=Oryza sativa subsp. japonica OX=39947 GN=XBOS34 PE=2 SV=1	--	--	PREDICTED: putative E3 ubiquitin-protein ligase XBAT35 [Daucus carota subsp. sativus]
c52717.graph_c0	542	903	228	138	34	67	11.73	16.86	4.76	2.54	0.69	1.49	5.88026e-05	-2.49862	down	--	--	--	--	--	--	Domain of unknown function (DUF4378);; Protein of unknown function (DUF3741)	--	S	Function unknown	PREDICTED: uncharacterized protein LOC108215333 isoform X2 [Daucus carota subsp. sativus]
c43200.graph_c0	43	61	17	5	2	4	1.6	2.06	0.61	0.18	0.08	0.15	0.00156361	-2.8109	down	--	--	Biological Process: developmental process (GO:0032502);;	--	--	--	TCP family transcription factor	Transcription factor TCP3 OS=Arabidopsis thaliana OX=3702 GN=TCP3 PE=1 SV=1	K	Transcription	PREDICTED: transcription factor TCP4-like [Daucus carota subsp. sativus]
c53155.graph_c0	413	349	404	214	102	69	17.1	12.57	16.2	7.52	3.97	2.95	0.00949928	-1.45179	down	[G]	Carbohydrate transport and metabolism	Biological Process: flavonoid biosynthetic process (GO:0009813);; Cellular Component: intracellular membrane-bounded organelle (GO:0043231);; Biological Process: flavonoid glucuronidation (GO:0052696);; Molecular Function: quercetin 3-O-glucosyltransferase activity (GO:0080043);; Molecular Function: quercetin 7-O-glucosyltransferase activity (GO:0080044);;	--	[GC]	--	UDP-glucoronosyl and UDP-glucosyl transferase	Beta-D-glucosyl crocetin beta-1,6-glucosyltransferase OS=Gardenia jasminoides OX=114476 GN=UGT94E5 PE=1 SV=1	S	Function unknown	PREDICTED: beta-D-glucosyl crocetin beta-1,6-glucosyltransferase-like [Daucus carota subsp. sativus]
c45656.graph_c0	251	137	127	33	35	18	10.67	5.06	5.23	1.19	1.4	0.79	0.000133096	-2.26836	down	--	--	Molecular Function: binding (GO:0005488);; Biological Process: cellular process (GO:0009987);;	--	[K]	Transcription	GATA zinc finger	Putative GATA transcription factor 22 OS=Arabidopsis thaliana OX=3702 GN=GATA22 PE=3 SV=1	K	Transcription	PREDICTED: GATA transcription factor 21-like [Daucus carota subsp. sativus]
c41624.graph_c0	329	296	375	858	913	871	13.09	10.78	15.62	29.09	32	37.01	0.00141006	1.54233	up	[O]	Posttranslational modification, protein turnover, chaperones	Cellular Component: chloroplast (GO:0009507);; Biological Process: vitamin E biosynthetic process (GO:0010189);; Molecular Function: phytol kinase activity (GO:0010276);; Cellular Component: integral component of membrane (GO:0016021);; Biological Process: phosphorylation (GO:0016310);;	K18678|5.87408e-59|sot:102599461|K18678 phytol kinase [EC:2.7.1.182] | (RefSeq) probable phytol kinase 1, chloroplastic	[S]	Function unknown	--	Probable phytol kinase 1, chloroplastic OS=Glycine max OX=3847 PE=2 SV=1	I	Lipid transport and metabolism	PREDICTED: probable phytol kinase 1, chloroplastic [Daucus carota subsp. sativus]
c41927.graph_c0	979	1261	1195	355	67	114	49.45	55.54	58.52	15.2	3.18	5.96	6.98998e-06	-2.4941	down	--	--	--	K09422|6.6797e-105|sind:105169011|K09422 myb proto-oncogene protein, plant | (RefSeq) transcription factor MYB86-like	[K]	Transcription	Myb-like DNA-binding domain;; Myb-like DNA-binding domain	Transcription factor MYB61 OS=Arabidopsis thaliana OX=3702 GN=MYB61 PE=2 SV=1	K	Transcription	PREDICTED: transcription factor MYB86-like [Daucus carota subsp. sativus]
c47748.graph_c0	6646	10993	6892	18920	15280	19701	226.77	348	233.24	588.22	484.78	723.19	0.00889861	1.3045	up	--	--	Cellular Component: endosome (GO:0005768);; Cellular Component: vacuolar membrane (GO:0005774);; Cellular Component: trans-Golgi network (GO:0005802);; Molecular Function: molybdate ion transmembrane transporter activity (GO:0015098);; Biological Process: molybdate ion transport (GO:0015689);; Cellular Component: integral component of membrane (GO:0016021);;	--	[G]	Carbohydrate transport and metabolism	Sugar-tranasporters, 12 TM;; Sugar-tranasporters, 12 TM;; Sugar-tranasporters, 12 TM	--	G	Carbohydrate transport and metabolism	PREDICTED: molybdate-anion transporter-like [Daucus carota subsp. sativus]
c40273.graph_c0	2	0	8	23	26	80	0.15	0	0.41	1.17	1.42	5.73	0.00122748	3.18846	up	[M]	Cell wall/membrane/envelope biogenesis	Molecular Function: UDP-glucose 4-epimerase activity (GO:0003978);; Biological Process: galactose metabolic process (GO:0006012);; Cellular Component: integral component of membrane (GO:0016021);; Molecular Function: UDP-arabinose 4-epimerase activity (GO:0050373);;	K12448|0|cam:101512552|K12448 UDP-arabinose 4-epimerase [EC:5.1.3.5] | (RefSeq) UDP-arabinose 4-epimerase 1-like	[M]	Cell wall/membrane/envelope biogenesis	GDP-mannose 4,6 dehydratase;; NAD dependent epimerase/dehydratase family;; 3-beta hydroxysteroid dehydrogenase/isomerase family;; Polysaccharide biosynthesis protein;; RmlD substrate binding domain;; GDP-mannose 4,6 dehydratase;; NAD dependent epimerase/dehydratase family	UDP-arabinose 4-epimerase 1 OS=Arabidopsis thaliana OX=3702 GN=MUR4 PE=1 SV=1	M	Cell wall/membrane/envelope biogenesis	PREDICTED: UDP-arabinose 4-epimerase 1-like [Daucus carota subsp. sativus]
c35472.graph_c0	113	322	59	29	36	4	15.65	40.02	8.13	3.33	4.61	0.62	0.00608181	-2.33598	down	--	--	Biological Process: response to auxin (GO:0009733);;	--	--	--	Auxin responsive protein	Auxin-responsive protein SAUR50 OS=Arabidopsis thaliana OX=3702 GN=SAUR50 PE=1 SV=1	S	Function unknown	PREDICTED: auxin-responsive protein SAUR72-like [Daucus carota subsp. sativus]
c48260.graph_c0	2018	1426	2138	800	269	473	49.56	29.94	50.63	16.45	6.25	11.84	0.00154384	-1.68224	down	[HC]	Coenzyme transport and metabolism ;; Energy production and conversion	Biological Process: response to heat (GO:0009408);; Biological Process: response to water deprivation (GO:0009414);; Cellular Component: chloroplast thylakoid membrane (GO:0009535);; Molecular Function: zeaxanthin epoxidase [overall] activity (GO:0009540);; Biological Process: abscisic acid biosynthetic process (GO:0009688);; Biological Process: xanthophyll biosynthetic process (GO:0016123);; Cel…	K09838|0|sly:544162|K09838 zeaxanthin epoxidase [EC:1.14.15.21] | (RefSeq) ZEP, ZE; zeaxanthin epoxidase, chloroplastic	[CR]	--	FAD binding domain;; FHA domain;; Pyridine nucleotide-disulphide oxidoreductase;; NAD(P)-binding Rossmann-like domain	Zeaxanthin epoxidase, chloroplastic OS=Solanum lycopersicum OX=4081 PE=2 SV=1	CH	--	zeaxanthin epoxidase, chloroplastic [Daucus carota subsp. sativus]
c41435.graph_c1	967	1334	100	136	66	59	51.27	61.74	5.19	6.11	3.28	3.25	0.000210986	-2.74693	down	[I]	Lipid transport and metabolism	Cellular Component: membrane (GO:0016020);; Molecular Function: hydrolase activity (GO:0016787);;	--	--	--	Alpha/beta hydrolase family;; alpha/beta hydrolase fold;; Serine aminopeptidase, S33	--	S	Function unknown	PREDICTED: uncharacterized protein LOC108197468 [Daucus carota subsp. sativus]
c38540.graph_c0	187	339	488	979	1847	2798	12.39	19.73	31.47	54.86	114.79	192.75	4.62597e-05	2.55497	up	[T]	Signal transduction mechanisms	Molecular Function: calcium ion binding (GO:0005509);;	K13448|1.45253e-81|sind:105159856|K13448 calcium-binding protein CML | (RefSeq) probable calcium-binding protein CML25	[T]	Signal transduction mechanisms	EF hand;; EF-hand domain pair;; EF hand;; EF-hand domain;; EF-hand domain pair;; EF-hand domain;; Secreted protein acidic and rich in cysteine Ca binding region;; Cytoskeletal-regulatory complex EF hand	Probable calcium-binding protein CML25 OS=Arabidopsis thaliana OX=3702 GN=CML25 PE=2 SV=1	DTZ	--	PREDICTED: probable calcium-binding protein CML25 [Daucus carota subsp. sativus]
c26471.graph_c0	85	69	33	19	1	5	9.32	5.84	4.22	2.06	0.09	0.74	0.00430877	-2.5068	down	--	--	--	--	--	--	EF hand;; EF-hand domain	--	S	Function unknown	PREDICTED: uncharacterized protein LOC108200921 [Daucus carota subsp. sativus]
c50667.graph_c0	602	775	594	1579	1208	2355	21.86	23.16	21.96	43.88	50.81	80.93	0.00434903	1.5464	up	--	--	Cellular Component: membrane (GO:0016020);;	--	--	--	--	--	S	Function unknown	PREDICTED: uncharacterized protein LOC108217531 [Daucus carota subsp. sativus]
c42128.graph_c0	85	50	117	19	4	14	4.39	2.36	5.89	0.85	0.19	0.8	0.00122748	-2.4169	down	--	--	--	--	--	--	Transcriptional repressor, ovate;; DNA-binding domain	Transcription repressor OFP4 OS=Arabidopsis thaliana OX=3702 GN=OFP4 PE=1 SV=1	S	Function unknown	PREDICTED: transcription repressor OFP1-like [Daucus carota subsp. sativus]
c45709.graph_c0	100	38	1	1	0	0	4.25	1.52	0.04	0.03	0	0	8.40496e-05	-4.3682	down	--	--	--	--	--	--	F-box domain	F-box protein At2g26850 OS=Arabidopsis thaliana OX=3702 GN=At2g26850 PE=2 SV=1	S	Function unknown	PREDICTED: F-box protein At2g26850-like [Daucus carota subsp. sativus]
c41396.graph_c0	306	108	124	48	26	26	13.95	4.29	5.48	1.86	1.11	1.23	0.00088562	-2.1506	down	[GR]	Carbohydrate transport and metabolism ;; General function prediction only	Molecular Function: catalytic activity (GO:0003824);; Biological Process: cellular metabolic process (GO:0044237);;	K20884|6.54517e-141|spen:107025832|K20884 riboflavin kinase / FMN hydrolase [EC:2.7.1.26 3.1.3.102] | (RefSeq) bifunctional riboflavin kinase/FMN phosphatase-like	[R]	General function prediction only	Haloacid dehalogenase-like hydrolase;; haloacid dehalogenase-like hydrolase;; HAD-hyrolase-like	Bifunctional riboflavin kinase/FMN phosphatase OS=Arabidopsis thaliana OX=3702 GN=FHY PE=1 SV=1	S	Function unknown	PREDICTED: bifunctional riboflavin kinase/FMN phosphatase-like [Daucus carota subsp. sativus]
c42306.graph_c1	180	196	120	358	268	1704	6.16	6.04	4.06	10.59	8.85	59.05	0.00325805	2.30506	up	--	--	--	K20456|0|sind:105155828|K20456 oxysterol-binding protein 1 | (RefSeq) oxysterol-binding protein-related protein 2A-like	[I]	Lipid transport and metabolism	Oxysterol-binding protein;; Pleckstrin homology domain;; PH domain	Oxysterol-binding protein-related protein 2A OS=Arabidopsis thaliana OX=3702 GN=ORP2A PE=2 SV=1	S	Function unknown	PREDICTED: oxysterol-binding protein-related protein 2A-like isoform X3 [Daucus carota subsp. sativus]
c42086.graph_c0	30	156	39	2	5	8	3.65	30.45	11.2	0.41	0.61	1.47	0.000394832	-3.0709	down	--	--	Molecular Function: peptidyl-prolyl cis-trans isomerase activity (GO:0003755);; Molecular Function: FK506 binding (GO:0005528);; Cellular Component: endoplasmic reticulum membrane (GO:0005789);; Cellular Component: chloroplast thylakoid (GO:0009534);; Cellular Component: thylakoid lumen (GO:0031977);; Biological Process: chaperone-mediated protein folding (GO:0061077);;	K01802|3.17724e-46|vvi:100259438|K01802 peptidylprolyl isomerase [EC:5.2.1.8] | (RefSeq) peptidyl-prolyl cis-trans isomerase FKBP16-3, chloroplastic	[O]	Posttranslational modification, protein turnover, chaperones	--	Peptidyl-prolyl cis-trans isomerase FKBP16-3, chloroplastic OS=Arabidopsis thaliana OX=3702 GN=FKBP16-3 PE=1 SV=2	O	Posttranslational modification, protein turnover, chaperones	PREDICTED: peptidyl-prolyl cis-trans isomerase FKBP16-3, chloroplastic [Daucus carota subsp. sativus]
c45296.graph_c0	867	205	546	2459	1552	2056	28.73	6.16	18.18	70.65	48.25	71.49	0.00260292	1.91709	up	--	--	--	--	--	--	Protein of unknown function (DUF668);; Domain of unknown function (DUF3475)	--	S	Function unknown	PREDICTED: uncharacterized protein LOC108199634 [Daucus carota subsp. sativus]
c51087.graph_c1	356	341	569	1715	1598	1803	13.54	11.07	20.57	53.4	56.24	70.42	9.75202e-06	2.11132	up	--	--	Molecular Function: zinc ion binding (GO:0008270);; Cellular Component: integral component of membrane (GO:0016021);;	--	[S]	Function unknown	RING-type zinc-finger;; Zinc finger, C3HC4 type (RING finger)	--	S	Function unknown	PREDICTED: RING finger and transmembrane domain-containing protein 1-like [Daucus carota subsp. sativus]
c48902.graph_c0	148	30	61	5	0	0	6.22	1.05	2.43	0.18	0	0	3.72392e-07	-4.50969	down	--	--	--	--	[K]	Transcription	CCT motif;; B-box zinc finger	Zinc finger protein CONSTANS-LIKE 16 OS=Arabidopsis thaliana OX=3702 GN=COL16 PE=1 SV=2	K	Transcription	PREDICTED: zinc finger protein CONSTANS-LIKE 16-like [Daucus carota subsp. sativus]
c38482.graph_c0	7	5	30	75	105	143	0.68	0.42	2.84	6.1	9.47	14.26	0.000328673	2.80651	up	--	--	Molecular Function: DNA binding (GO:0003677);;	--	--	--	Helix-loop-helix DNA-binding domain	Transcription factor bHLH162 OS=Arabidopsis thaliana OX=3702 GN=BHLH162 PE=1 SV=1	S	Function unknown	PREDICTED: uncharacterized protein LOC108194323 [Daucus carota subsp. sativus]
c47649.graph_c0	241	330	191	830	462	817	9.71	11.35	7.22	27.13	16.57	32.09	0.00176487	1.59705	up	[S]	Function unknown	Cellular Component: membrane (GO:0016020);; Molecular Function: phospholipid scramblase activity (GO:0017128);; Cellular Component: intracellular membrane-bounded organelle (GO:0043231);; Cellular Component: cytoplasmic part (GO:0044444);;	--	[M]	Cell wall/membrane/envelope biogenesis	Scramblase	--	S	Function unknown	PREDICTED: phospholipid scramblase family protein C343.06c [Daucus carota subsp. sativus]
c49993.graph_c0	54	9	57	2	3	0	2.57	0.37	2.63	0.08	0.13	0	0.000435306	-3.51602	down	--	--	--	--	--	--	--	Protein LNK2 OS=Arabidopsis thaliana OX=3702 GN=LNK2 PE=1 SV=1	S	Function unknown	PREDICTED: protein LNK2 isoform X1 [Daucus carota subsp. sativus]
c44406.graph_c0	81	89	80	18	19	2	4.42	3.59	3.64	0.57	0.9	0.08	0.00257555	-2.30529	down	--	--	Cellular Component: chloroplast thylakoid membrane (GO:0009535);; Cellular Component: chloroplast envelope (GO:0009941);;	--	--	--	--	Uncharacterized protein At4g37920 OS=Arabidopsis thaliana OX=3702 GN=At4g37920 PE=2 SV=2	S	Function unknown	PREDICTED: uncharacterized protein At4g37920, chloroplastic [Daucus carota subsp. sativus]
c44577.graph_c0	1892	1886	2077	5108	8782	8379	136.54	122.78	152.98	309.87	612.84	569.14	4.34592e-05	2.07996	up	[P]	Inorganic ion transport and metabolism	Cellular Component: membrane (GO:0016020);;	--	[P]	Inorganic ion transport and metabolism	ChaC-like protein	Gamma-glutamylcyclotransferase 2-2 OS=Arabidopsis thaliana OX=3702 GN=GGCT2;2 PE=1 SV=1	P	Inorganic ion transport and metabolism	PREDICTED: putative glutathione-specific gamma-glutamylcyclotransferase 2 [Daucus carota subsp. sativus]
c33563.graph_c0	1668	1295	2166	4259	7377	3859	164.71	113.56	209.21	354.75	683.91	400.14	0.00267948	1.71376	up	--	--	Cellular Component: plasma membrane (GO:0005886);; Molecular Function: peptide-methionine (R)-S-oxide reductase activity (GO:0033743);; Biological Process: oxidation-reduction process (GO:0055114);;	--	--	--	SelR domain	--	S	Function unknown	PREDICTED: peptide methionine sulfoxide reductase MsrB [Daucus carota subsp. sativus]
c45185.graph_c0	349	826	413	106	40	73	21.58	44.49	25.06	6.29	2.26	5.5	1.07373e-06	-2.55581	down	--	--	Biological Process: chloroplast organization (GO:0009658);;	--	--	--	Staygreen protein;; gag-polypeptide of LTR copia-type	Protein STAY-GREEN LIKE, chloroplastic OS=Arabidopsis thaliana OX=3702 GN=SGRL PE=2 SV=1	S	Function unknown	PREDICTED: protein STAY-GREEN LIKE, chloroplastic-like [Daucus carota subsp. sativus]
c42120.graph_c1	540	1007	218	168	34	78	31.85	52.78	12.61	8.64	1.93	4.84	0.000513384	-2.34434	down	--	--	--	--	--	--	--	--	S	Function unknown	PREDICTED: uncharacterized protein LOC108223656 [Daucus carota subsp. sativus]
c48025.graph_c1	284	297	329	562	1293	1300	26.95	25.4	30.67	46.37	118.05	131.3	0.00105725	1.95235	up	--	--	Biological Process: phosphorelay signal transduction system (GO:0000160);; Cellular Component: nucleus (GO:0005634);; Cellular Component: cytoplasm (GO:0005737);; Biological Process: cytokinin-activated signaling pathway (GO:0009736);; Molecular Function: histidine phosphotransfer kinase activity (GO:0009927);; Biological Process: phosphorylation (GO:0016310);; Molecular Function: 2-alkenal reduc…	K14490|2.72785e-82|vvi:100250410|K14490 histidine-containing phosphotransfer peotein | (RefSeq) histidine-containing phosphotransfer protein 1	[T]	Signal transduction mechanisms	Hpt domain	Histidine-containing phosphotransfer protein 1 OS=Arabidopsis thaliana OX=3702 GN=AHP1 PE=1 SV=1	T	Signal transduction mechanisms	PREDICTED: histidine-containing phosphotransfer protein 1-like [Daucus carota subsp. sativus]
c40891.graph_c0	10720	14218	17558	1986	3249	2778	611.95	709.09	972.92	96.74	176	165.66	5.91753e-05	-2.06688	down	--	--	Biological Process: response to light stimulus (GO:0009416);; Cellular Component: photosystem I (GO:0009522);; Cellular Component: chloroplast thylakoid membrane (GO:0009535);; Biological Process: photosynthesis, light harvesting in photosystem I (GO:0009768);; Cellular Component: chloroplast envelope (GO:0009941);; Cellular Component: plastoglobule (GO:0010287);; Cellular Component: integral com…	K08907|1.47223e-114|sita:101784575|K08907 light-harvesting complex I chlorophyll a/b binding protein 1 | (RefSeq) chlorophyll a-b binding protein 1B-21, chloroplastic	--	--	Chlorophyll A-B binding protein	Chlorophyll a-b binding protein 1B-21, chloroplastic OS=Hordeum vulgare OX=4513 GN=LHC Ib-21 PE=1 SV=1	O	Posttranslational modification, protein turnover, chaperones	PREDICTED: chlorophyll a-b binding protein 6A, chloroplastic-like [Daucus carota subsp. sativus]
c39221.graph_c0	291	376	295	754	636	648	22.57	24.44	21.93	53.09	51.61	56.05	0.00908337	1.23643	up	--	--	--	--	--	--	--	--	--	--	PREDICTED: uncharacterized protein LOC108219711 isoform X1 [Daucus carota subsp. sativus]
c32991.graph_c0	1	31	19	0	0	0	0.09	2.53	1.71	0	0	0	0.00408136	-3.66771	down	--	--	Biological Process: response to auxin (GO:0009733);;	K14488|5.26975e-46|sly:101247499|K14488 SAUR family protein | (RefSeq) auxin-induced protein 15A	--	--	Auxin responsive protein	Auxin-responsive protein SAUR50 OS=Helianthus annuus OX=4232 PE=3 SV=1	S	Function unknown	PREDICTED: auxin-induced protein 15A [Daucus carota subsp. sativus]
c41410.graph_c0	175	339	19	25	15	14	9.9	17.03	1.13	1.18	0.74	0.81	0.00099986	-2.73121	down	--	--	--	--	--	--	--	Transcription factor PAR1 OS=Arabidopsis thaliana OX=3702 GN=PAR1 PE=1 SV=1	S	Function unknown	PREDICTED: transcription factor PAR1 [Daucus carota subsp. sativus]
c52851.graph_c0	1397	2244	1728	5073	2945	4108	24.18	36.23	32.1	103.39	61.15	95.72	0.00652587	1.3053	up	[T]	Signal transduction mechanisms	Molecular Function: protein serine/threonine kinase activity (GO:0004674);; Molecular Function: ATP binding (GO:0005524);; Biological Process: protein phosphorylation (GO:0006468);;	--	[D]	Cell cycle control, cell division, chromosome partitioning	AUX/IAA family;; Protein kinase domain;; Protein tyrosine kinase	Protein IMPAIRED IN BABA-INDUCED STERILITY 1 OS=Arabidopsis thaliana OX=3702 GN=IBS1 PE=3 SV=1	T	Signal transduction mechanisms	PREDICTED: probable serine/threonine-protein kinase At1g54610 isoform X1 [Daucus carota subsp. sativus]
c52903.graph_c0	251	799	110	107	43	55	4.17	11.68	1.68	1.54	0.63	0.88	0.00388644	-2.12981	down	[L]	Replication, recombination and repair	Biological Process: resolution of meiotic recombination intermediates (GO:0000712);; Biological Process: sister chromatid segregation (GO:0000819);; Molecular Function: DNA binding (GO:0003677);; Molecular Function: DNA topoisomerase type II (ATP-hydrolyzing) activity (GO:0003918);; Molecular Function: ATP binding (GO:0005524);; Cellular Component: nucleus (GO:0005634);; Biological Process: DNA t…	K03164|0|nnu:104585888|K03164 DNA topoisomerase II [EC:5.99.1.3] | (RefSeq) DNA topoisomerase 2-like	[B]	Chromatin structure and dynamics	DNA gyrase/topoisomerase IV, subunit A;; C-terminal associated domain of TOPRIM;; DNA gyrase B	DNA topoisomerase 2 OS=Arabidopsis thaliana OX=3702 GN=TOP2 PE=2 SV=2	L	Replication, recombination and repair	PREDICTED: DNA topoisomerase 2 isoform X2 [Daucus carota subsp. sativus]
c47812.graph_c0	124	132	132	831	1047	4431	3.31	3.42	3.26	17.41	23.85	119.06	1.69274e-09	3.94918	up	[R]	General function prediction only	--	--	--	--	NHL repeat	Protein SUPPRESSOR OF QUENCHING 1, chloroplastic OS=Arabidopsis thaliana OX=3702 GN=SOQ1 PE=1 SV=1	S	Function unknown	PREDICTED: uncharacterized protein LOC108221678 [Daucus carota subsp. sativus]
c45921.graph_c1	897	1550	873	4955	3571	3120	30.61	45.85	28.79	143.55	114.3	109.73	6.86465e-06	1.92153	up	[MDT]	Cell wall/membrane/envelope biogenesis ;; Cell cycle control, cell division, chromosome partitioning ;; Signal transduction mechanisms	Molecular Function: ATP binding (GO:0005524);; Cellular Component: chloroplast (GO:0009507);;	--	[O]	Posttranslational modification, protein turnover, chaperones	Ankyrin repeats (3 copies);; Ankyrin repeats (many copies);; Ankyrin repeats (many copies);; Ankyrin repeat;; ATPase family associated with various cellular activities (AAA);; Ankyrin repeat	Protein CfxQ homolog OS=Cyanidioschyzon merolae (strain 10D) OX=280699 GN=cfxQ PE=3 SV=2	O	Posttranslational modification, protein turnover, chaperones	PREDICTED: ESX-3 secretion system protein EccA3 [Daucus carota subsp. sativus]
c41512.graph_c0	2374	2824	2596	1076	780	959	122.5	126.1	128.97	47.29	37.57	50.95	0.00636153	-1.24724	down	[O]	Posttranslational modification, protein turnover, chaperones	Molecular Function: serine-type endopeptidase activity (GO:0004252);; Biological Process: proteolysis (GO:0006508);;	K01358|2.11693e-78|pop:POPTR_0014s11480g|K01358 ATP-dependent Clp protease, protease subunit [EC:3.4.21.92] | (RefSeq) POPTRDRAFT_731676; hypothetical protein	[O]	Posttranslational modification, protein turnover, chaperones	Clp protease;; Clp protease	ATP-dependent Clp protease proteolytic subunit 5, chloroplastic OS=Arabidopsis thaliana OX=3702 GN=CLPP5 PE=1 SV=1	O	Posttranslational modification, protein turnover, chaperones	PREDICTED: ATP-dependent Clp protease proteolytic subunit 5, chloroplastic [Daucus carota subsp. sativus]
c39055.graph_c0	1	161	16	1	4	1	0.06	8.33	0.94	0.05	0.24	0.07	0.00442667	-3.29179	down	--	--	Cellular Component: nucleus (GO:0005634);; Biological Process: regulation of transcription, DNA-templated (GO:0006355);; Molecular Function: sequence-specific DNA binding (GO:0043565);;	K09338|3.42601e-48|nnu:104595754|K09338 homeobox-leucine zipper protein | (RefSeq) homeobox-leucine zipper protein ATHB-40-like	[K]	Transcription	Homeobox domain;; Homeobox KN domain	Homeobox-leucine zipper protein ATHB-40 OS=Arabidopsis thaliana OX=3702 GN=ATHB-40 PE=2 SV=3	K	Transcription	PREDICTED: homeobox-leucine zipper protein ATHB-40 [Daucus carota subsp. sativus]
c46587.graph_c0	775	1361	1605	4755	4945	7817	14.27	21.41	27.1	69.94	84.29	147.34	9.30995e-06	2.33943	up	--	--	Molecular Function: transcription corepressor activity (GO:0003714);; Cellular Component: nucleus (GO:0005634);; Biological Process: response to wounding (GO:0009611);; Biological Process: regulation of defense response (GO:0031347);; Biological Process: negative regulation of nucleic acid-templated transcription (GO:1903507);; Biological Process: regulation of jasmonic acid mediated signaling pa…	--	--	--	tify domain;; Protein of unknown function (DUF2607)	Protein TIFY 8 OS=Arabidopsis thaliana OX=3702 GN=TIFY8 PE=1 SV=1	S	Function unknown	PREDICTED: protein TIFY 8 isoform X2 [Daucus carota subsp. sativus]
c34767.graph_c1	61	212	26	22	14	8	5.67	17.47	2.36	1.79	1.22	0.78	0.00750932	-2.28584	down	--	--	--	--	--	--	--	--	S	Function unknown	PREDICTED: stress response protein NST1 [Daucus carota subsp. sativus]
c49996.graph_c0	131	688	76	43	39	44	4.23	19.23	2.37	1.18	1.21	1.46	0.00415218	-2.29338	down	--	--	--	--	--	--	--	--	S	Function unknown	PREDICTED: uncharacterized protein LOC108218387 isoform X1 [Daucus carota subsp. sativus]
c38354.graph_c0	1	5	6	29	69	143	0.1	0.57	0.51	2.26	6.43	16.49	1.07239e-06	3.96716	up	[O]	Posttranslational modification, protein turnover, chaperones	Biological Process: sulfate assimilation (GO:0000103);; Cellular Component: cytosol (GO:0005829);; Cellular Component: plasma membrane (GO:0005886);; Biological Process: protein folding (GO:0006457);; Biological Process: glycerol ether metabolic process (GO:0006662);; Molecular Function: protein disulfide oxidoreductase activity (GO:0015035);; Molecular Function: oxidoreductase activity, acting o…	K03671|1.29218e-23|cit:102624646|K03671 thioredoxin 1 | (RefSeq) thioredoxin H-type	[O]	Posttranslational modification, protein turnover, chaperones	--	Thioredoxin H-type OS=Ricinus communis OX=3988 PE=3 SV=1	O	Posttranslational modification, protein turnover, chaperones	PREDICTED: thioredoxin H-type [Daucus carota subsp. sativus]
c44730.graph_c0	27	29	9	2	1	1	1.24	1.16	0.4	0.08	0.04	0.05	0.00641556	-2.97874	down	--	--	Molecular Function: RNA polymerase II regulatory region sequence-specific DNA binding (GO:0000977);; Molecular Function: RNA polymerase II transcription factor binding (GO:0001085);; Molecular Function: transcriptional activator activity, RNA polymerase II transcription regulatory region sequence-specific binding (GO:0001228);; Molecular Function: chromatin binding (GO:0003682);; Cellular Compone…	--	[K]	Transcription	GATA zinc finger	GATA transcription factor 12 OS=Arabidopsis thaliana OX=3702 GN=GATA12 PE=2 SV=1	K	Transcription	PREDICTED: GATA transcription factor 12-like [Daucus carota subsp. sativus]
c43878.graph_c0	65	76	108	8	6	5	2.87	3.13	4.54	0.32	0.28	0.29	6.93699e-07	-3.25358	down	[E]	Amino acid transport and metabolism	Molecular Function: L-tyrosine:2-oxoglutarate aminotransferase activity (GO:0004838);; Biological Process: cellular amino acid metabolic process (GO:0006520);; Biological Process: vitamin E biosynthetic process (GO:0010189);; Molecular Function: pyridoxal phosphate binding (GO:0030170);;	K00815|0|pper:PRUPE_ppa006368mg|K00815 tyrosine aminotransferase [EC:2.6.1.5] | (RefSeq) hypothetical protein	[E]	Amino acid transport and metabolism	Aminotransferase class I and II;; Beta-eliminating lyase	Probable aminotransferase TAT2 OS=Arabidopsis thaliana OX=3702 GN=At5g53970 PE=2 SV=1	E	Amino acid transport and metabolism	PREDICTED: probable aminotransferase TAT2 [Daucus carota subsp. sativus]
c46842.graph_c0	179	611	27	2	0	2	6.89	21.45	1.13	0.06	0	0.09	5.28559e-12	-5.89553	down	[G]	Carbohydrate transport and metabolism	Molecular Function: polygalacturonase activity (GO:0004650);; Cellular Component: extracellular region (GO:0005576);; Biological Process: carbohydrate metabolic process (GO:0005975);; Molecular Function: lyase activity (GO:0016829);; Biological Process: cell wall organization (GO:0071555);;	--	--	--	Glycosyl hydrolases family 28;; Pectate lyase superfamily protein	Polygalacturonase At1g48100 OS=Arabidopsis thaliana OX=3702 GN=At1g48100 PE=2 SV=1	M	Cell wall/membrane/envelope biogenesis	PREDICTED: polygalacturonase At1g48100-like [Daucus carota subsp. sativus]
c43039.graph_c0	10422	14231	16219	1987	3692	3173	836.44	1010.39	1293.33	129.54	263.75	256.21	0.000714514	-1.85725	down	--	--	Cellular Component: chloroplast thylakoid membrane (GO:0009535);; Cellular Component: photosystem I reaction center (GO:0009538);; Biological Process: photosynthesis (GO:0015979);; Cellular Component: integral component of membrane (GO:0016021);;	K02699|9.98291e-86|nnu:104605295|K02699 photosystem I subunit XI | (RefSeq) photosystem I reaction center subunit XI, chloroplastic	--	--	Photosystem I reaction centre subunit XI	Photosystem I reaction center subunit XI, chloroplastic OS=Spinacia oleracea OX=3562 GN=PSAL PE=1 SV=1	C	Energy production and conversion	PREDICTED: photosystem I reaction center subunit XI, chloroplastic-like [Daucus carota subsp. sativus]
c47910.graph_c0	369	671	271	156	66	121	8.98	13.37	5.95	3.05	1.88	3.03	0.00420148	-1.66723	down	--	--	--	--	--	--	QWRF family	AUGMIN subunit 8 OS=Arabidopsis thaliana OX=3702 GN=AUG8 PE=1 SV=1	S	Function unknown	PREDICTED: AUGMIN subunit 8 [Daucus carota subsp. sativus]
c38241.graph_c0	53	1	15	0	0	0	3.36	0.04	1.65	0	0	0	0.00113163	-3.98625	down	[N]	Cell motility	Molecular Function: transferase activity, transferring glycosyl groups (GO:0016757);;	--	--	--	--	--	S	Function unknown	hypothetical protein KFL_000250330 [Klebsormidium nitens]
c43917.graph_c0	90	153	394	920	1281	6409	4.06	6.85	15.12	26.76	39.96	218.87	3.81976e-06	3.56816	up	--	--	Molecular Function: DNA binding (GO:0003677);; Molecular Function: transcription factor activity, sequence-specific DNA binding (GO:0003700);; Cellular Component: nucleus (GO:0005634);; Biological Process: regulation of transcription, DNA-templated (GO:0006355);;	--	--	--	AP2 domain;; Heavy-metal-associated domain	Ethylene-responsive transcription factor ERF025 OS=Arabidopsis thaliana OX=3702 GN=ERF025 PE=2 SV=1	K	Transcription	PREDICTED: ethylene-responsive transcription factor ERF027-like [Daucus carota subsp. sativus]
c52152.graph_c0	91	109	37	20	0	6	2.28	2.34	0.89	0.42	0	0.15	0.00226666	-2.7192	down	--	--	--	--	--	--	Protein of unknown function (DUF688)	--	S	Function unknown	PREDICTED: uncharacterized protein LOC108197182 isoform X1 [Daucus carota subsp. sativus]
c40432.graph_c0	532	1334	632	168	175	164	36.07	79.98	42.31	9.7	11.34	11.4	0.000193754	-1.96792	down	[S]	Function unknown	--	K02221|2.12263e-41|cic:CICLE_v10009264mg|K02221 YggT family protein | (RefSeq) hypothetical protein	--	--	--	YlmG homolog protein 2, chloroplastic OS=Arabidopsis thaliana OX=3702 GN=YLMG2 PE=2 SV=1	S	Function unknown	PREDICTED: ylmG homolog protein 2, chloroplastic [Daucus carota subsp. sativus]
c52381.graph_c0	434	523	527	2993	1701	2425	9.47	11.66	11.55	56.08	35.66	51.13	7.19489e-09	2.34639	up	--	--	--	--	[R]	General function prediction only	JmjC domain, hydroxylase;; jmjN domain;; C5HC2 zinc finger	Lysine-specific demethylase JMJ706 OS=Oryza sativa subsp. japonica OX=39947 GN=JMJ706 PE=2 SV=1	S	Function unknown	PREDICTED: lysine-specific demethylase JMJ706-like isoform X2 [Daucus carota subsp. sativus]
c38450.graph_c0	878	1536	1429	4223	4471	3451	43.96	67.14	69.59	179.57	210.22	178.04	0.000118437	1.79114	up	[ER]	Amino acid transport and metabolism ;; General function prediction only	Molecular Function: L-iditol 2-dehydrogenase activity (GO:0003939);; Molecular Function: zinc ion binding (GO:0008270);; Biological Process: oxidation-reduction process (GO:0055114);;	K00008|1.26693e-141|fve:101305015|K00008 L-iditol 2-dehydrogenase [EC:1.1.1.14] | (RefSeq) sorbitol dehydrogenase	[Q]	Secondary metabolites biosynthesis, transport and catabolism	Alcohol dehydrogenase GroES-like domain;; Zinc-binding dehydrogenase;; Zinc-binding dehydrogenase	Sorbitol dehydrogenase OS=Arabidopsis thaliana OX=3702 GN=SDH PE=1 SV=1	E	Amino acid transport and metabolism	PREDICTED: sorbitol dehydrogenase-like [Daucus carota subsp. sativus]
c49931.graph_c0	898	1258	865	3290	2682	5975	41.09	53.74	30.89	84.86	117.76	225.26	6.96329e-05	2.12696	up	--	--	--	--	[V]	Defense mechanisms	Protein of unknown function (DUF1068)	--	S	Function unknown	PREDICTED: uncharacterized protein LOC108223804 isoform X1 [Daucus carota subsp. sativus]
c43166.graph_c0	893	870	1138	134	124	154	51.51	43.07	64.08	6.33	6.43	9.03	1.82507e-08	-2.51464	down	[O]	Posttranslational modification, protein turnover, chaperones	Biological Process: glycerol ether metabolic process (GO:0006662);; Cellular Component: chloroplast stroma (GO:0009570);; Cellular Component: chloroplast envelope (GO:0009941);; Molecular Function: protein disulfide oxidoreductase activity (GO:0015035);; Biological Process: cell redox homeostasis (GO:0045454);; Biological Process: oxidation-reduction process (GO:0055114);;	--	[O]	Posttranslational modification, protein turnover, chaperones	Thioredoxin	Thioredoxin-like protein CDSP32, chloroplastic OS=Arabidopsis thaliana OX=3702 GN=CDSP32 PE=1 SV=1	O	Posttranslational modification, protein turnover, chaperones	hypothetical protein DCAR_009514 [Daucus carota subsp. sativus]
c43501.graph_c0	132	358	176	604	870	1271	6.18	13.02	6.47	20.47	34.78	52.76	0.000276028	2.19426	up	--	--	--	--	--	--	--	--	S	Function unknown	hypothetical protein DCAR_024854 [Daucus carota subsp. sativus]
c50616.graph_c0	1161	885	673	151	271	144	56.7	37.72	31.88	6.25	12.43	7.28	0.000484326	-1.9297	down	[R]	General function prediction only	Molecular Function: catalytic activity (GO:0003824);; Biological Process: metabolic process (GO:0008152);; Cellular Component: integral component of membrane (GO:0016021);;	--	[R]	General function prediction only	Type I phosphodiesterase / nucleotide pyrophosphatase	--	S	Function unknown	PREDICTED: ectonucleotide pyrophosphatase/phosphodiesterase family member 3-like [Daucus carota subsp. sativus]
c50652.graph_c1	898	1493	501	369	228	254	31.63	45.86	17.84	11.06	8.65	9.46	0.00780299	-1.50523	down	[P]	Inorganic ion transport and metabolism	Molecular Function: transporter activity (GO:0005215);; Biological Process: transport (GO:0006810);; Cellular Component: integral component of membrane (GO:0016021);;	K12347|0|rcu:8285616|K12347 natural resistance-associated macrophage protein | (RefSeq) metal transporter Nramp3	[P]	Inorganic ion transport and metabolism	Natural resistance-associated macrophage protein	Metal transporter Nramp3 OS=Arabidopsis thaliana OX=3702 GN=NRAMP3 PE=1 SV=2	P	Inorganic ion transport and metabolism	PREDICTED: metal transporter Nramp3-like [Daucus carota subsp. sativus]
c17705.graph_c0	49	85	56	101	253	490	7.63	7.73	8.13	11.57	26.88	60.95	0.00173703	2.27093	up	--	--	Molecular Function: metal ion binding (GO:0046872);;	--	[R]	General function prediction only	AN1-like Zinc finger	Zinc finger AN1 domain-containing stress-associated protein 12 OS=Arabidopsis thaliana OX=3702 GN=SAP12 PE=2 SV=2	S	Function unknown	PREDICTED: zinc finger AN1 domain-containing stress-associated protein 12 [Daucus carota subsp. sativus]
c36679.graph_c0	135	229	196	31	52	34	14.29	21.61	20.4	2.77	5.17	3.79	0.0013438	-1.91034	down	--	--	Cellular Component: integral component of membrane (GO:0016021);;	--	--	--	--	--	S	Function unknown	PREDICTED: uncharacterized protein LOC108220101 [Daucus carota subsp. sativus]
c43631.graph_c0	738	955	1243	330	253	274	29.01	32.44	47.28	9.88	9.26	10.92	0.00154538	-1.54684	down	--	--	--	K14505|1.58406e-55|vvi:100264093|K14505 cyclin D3, plant | (RefSeq) cyclin-D3-3	[D]	Cell cycle control, cell division, chromosome partitioning	Cyclin, C-terminal domain	Cyclin-D3-1 OS=Arabidopsis thaliana OX=3702 GN=CYCD3-1 PE=1 SV=3	D	Cell cycle control, cell division, chromosome partitioning	hypothetical protein DCAR_001635 [Daucus carota subsp. sativus]
c34430.graph_c0	42	2	11	0	0	0	8.47	0.37	2.21	0	0	0	0.00231557	-3.80949	down	--	--	Cellular Component: photosystem II (GO:0009523);; Cellular Component: plastid (GO:0009536);; Cellular Component: thylakoid membrane (GO:0042651);;	K03541|1.2407e-34|smo:SELMODRAFT_180828|K03541 photosystem II 10kDa protein | (RefSeq) hypothetical protein	--	--	Photosystem II 10 kDa polypeptide PsbR	Photosystem II 10 kDa polypeptide, chloroplastic OS=Hordeum vulgare OX=4513 GN=PSBR PE=3 SV=1	S	Function unknown	hypothetical protein SELMODRAFT_180828 [Selaginella moellendorffii]
c45696.graph_c1	137	62	60	14	1	7	13.68	5.51	5.93	1.15	0.09	0.72	5.58789e-05	-3.09132	down	--	--	--	--	--	--	--	Transcription activator GLK2 OS=Arabidopsis thaliana OX=3702 GN=GLK2 PE=1 SV=1	K	Transcription	PREDICTED: transcription activator GLK1-like [Daucus carota subsp. sativus]
c35620.graph_c0	181	278	422	23	10	21	14.39	19.49	32.71	1.55	0.75	1.74	7.00256e-11	-3.62617	down	--	--	--	--	--	--	--	--	--	--	hypothetical protein DCAR_008749 [Daucus carota subsp. sativus]
c51582.graph_c0	357	425	287	1980	1951	4102	15.11	14.7	9.84	60.92	78.72	164.85	4.35732e-09	3.00965	up	--	--	Molecular Function: aspartic-type endopeptidase activity (GO:0004190);; Biological Process: proteolysis (GO:0006508);; Cellular Component: integral component of membrane (GO:0016021);; Biological Process: protein catabolic process (GO:0030163);;	--	[O]	Posttranslational modification, protein turnover, chaperones	Xylanase inhibitor N-terminal;; Eukaryotic aspartyl protease;; Xylanase inhibitor C-terminal;; Xylanase inhibitor C-terminal	Aspartic proteinase-like protein 2 OS=Arabidopsis thaliana OX=3702 GN=At1g65240 PE=1 SV=2	O	Posttranslational modification, protein turnover, chaperones	hypothetical protein DCAR_017647 [Daucus carota subsp. sativus]
[truncated: 939 more rows]

## Sheet: Pre vs Post DEGs
#ID	JB-18-1-1_Count	JB-18-1-2_Count	JB-18-1-3_Count	JA-18-1-1_Count	JA-18-1-2_Count	JA-18-1-3_Count	JB-18-1-1_FPKM	JB-18-1-2_FPKM	JB-18-1-3_FPKM	JA-18-1-1_FPKM	JA-18-1-2_FPKM	JA-18-1-3_FPKM	FDR	log2FC	regulated	COG_class	COG_class_annotation	GO_annotation	KEGG_annotation	KOG_class	KOG_class_annotation	Pfam_annotation	Swissprot_annotation	eggNOG_class	eggNOG_class_annotation	nr_annotation
[truncated: 2,985 more rows]

## Sheet: Pre vs Control
#ID	JB-18-1-1_Count	JB-18-1-2_Count	JB-18-1-3_Count	JC-18-1-1_Count	JC-18-1-2_Count	JC-18-1-3_Count	JB-18-1-1_FPKM	JB-18-1-2_FPKM	JB-18-1-3_FPKM	JC-18-1-1_FPKM	JC-18-1-2_FPKM	JC-18-1-3_FPKM	FDR	log2FC	regulated	COG_class	COG_class_annotation	GO_annotation	KEGG_annotation	KOG_class	KOG_class_annotation	Pfam_annotation	Swissprot_annotation	eggNOG_class	eggNOG_class_annotation	nr_annotation
[truncated: 1,493 more rows]
