# Supplementary material for: Comparative Transcriptomic Analysis Provides Novel Insights into the Blanched Stem of Oenanthe javanica
Source: Plants (Basel). 2021 Nov 17;10(11):2484. doi: 10.3390/plants10112484 (PMC8625949; doi:10.3390/plants10112484)
Supplement: Supplementary file 1 [file plants-10-02484-s001.zip › Supplementary table 5 KEGG pathways.xlsx]

## Sheet: Sheet1
Comparative profile of 25 enriched pathways under blanching treatment
Pathway	ko_ID	Total DEGs			Upregulated DEGs			Downregulated DEGs
		Pre vs	Pre vs Post	Pre vs Control	Pre vs Mid	Pre vs Post	Pre vs Control	Pre vs Mid	Pre vs Post	Pre vs Control
		Mid
Plant hormone signal transduction	ko04075	20	48	18	13	32	13	7	16	5
Ribosome	ko03010	22	42	7	0	4	7	22	38	0
Protein processing in endoplasmic reticulum	ko04141	11	38	12	10	34	7	1	4	5
Starch and sucrose metabolism	ko00500	24	38	29	10	13	7	14	25	22
Carbon metabolism	ko01200	24	37	16	2	10	3	22	27	13
Photosynthesis	ko00195	32	36	6	0	1	2	32	35	4
Biosynthesis of amino acids	ko01230	17	33	11	2	21	3	15	12	8
Phenylpropanoid biosynthesis	ko00940	16	25	18	3	14	3	13	11	15
Plant-pathogen interaction	ko04626	13	24	12	12	14	1	1	10	11
Glycine, serine and threonine metabolism	ko00260	10	24	7	1	10	4	9	14	3
Spliceosome	ko03040	6	20	6	6	19	5	0	1	1
Photosynthesis - antenna proteins	ko00196	18	19	1	0	0	0	18	19	1
Carbon fixation in photosynthetic organisms	ko00710	13	18	8	0	2	0	13	16	8
Glycolysis / Gluconeogenesis	ko00010	10	18	8	2	6	4	8	12	4
Porphyrin and chlorophyll metabolism	ko00860	12	17	4	0	0	0	12	17	4
Glyoxylate and dicarboxylate metabolism	ko00630	12	17	4	0	4	0	12	13	4
Amino sugar and nucleotide sugar metabolism	ko00520	9	16	11	6	6	3	3	10	8
Endocytosis	ko04144	15	15	7	13	14	1	2	1	6
mRNA surveillance pathway	ko03015	3	14	6	3	12	4	0	2	2
Pentose and glucuronate interconversions	ko00040	10	13	7	1	4	3	9	9	4
Glycerolipid metabolism	ko00561	9	13	5	6	3	1	3	10	4
Cysteine and methionine metabolism	ko00270	5	12	3	1	10	1	4	2	2
Aminoacyl-tRNA biosynthesis	ko00970	2	12	0	0	0	0	2	12	0
RNA transport	ko03013	6	11	6	5	10	6	1	1	0
Glutathione metabolism	ko00480	3	10	4	2	4	1	1	6	3
