# Supplementary material for: Comparative Transcriptomic Analysis Provides Novel Insights into the Blanched Stem of Oenanthe javanica
Source: Plants (Basel). 2021 Nov 17;10(11):2484. doi: 10.3390/plants10112484 (PMC8625949; doi:10.3390/plants10112484)
Supplement: Supplementary file 1 [file plants-10-02484-s001.zip › Supplementary table 6 TFs.xlsx]

## Sheet: Sheet1
Distribution of differentially expressed transcription factors in the stem of water dropwort
	Pre vs Mid-blanching			Pre vs Post-blanching			Pre vs Control
TF families	Total	Up	down	Total	Up	down	Total	Up	down
ERF	11	5	6	24	22	2	12	2	10
BHLH	13	2	11	26	17	9	11	2	9
Zinc finger	11	5	6	21	14	7	6	2	4
MYB	19	8	11	19	17	2	12	7	5
WRKY	2	1	1	12	6	6	18	0	18
C3H	2	1	1	9	6	3	10	6	4
NAC	6	5	1	9	6	3	7	2	5
bZIP	6	2	4	8	5	3	2	1	1
Trihelix	2	1	1	8	7	1	1	1	0
GRAS	4	0	4	3	1	2	9	1	8
Dof	2	1	1	7	7	0	5	3	2
HSF	3	1	2	7	5	2	4	2	2
DBB	7	0	7	3	3	0	4	2	2
CO-like	7	2	5	6	2	4	2	1	1
DREB	5	4	1	7	1	6	4	0	4
GATA	4	2	3	6	4	2	3	2	1
AUX/IAA	2	2	0	6	4	2	5	3	2
OFP	4	0	4	6	1	5	3	1	2
C2H2	3	1	2	3	2	1	6	0	6
LOB	1	0	1	5	4	1	1	1	0
TCP	4	0	4	3	3	0	0	0	0
PHD	1	1	0	4	4	0	3	3	0
MYB_related	2	0	2	3	3	0	2	1	1
G2-like	1	0	1	3	1	2	0	0	0
RAV	0	0	0	3	3	0	1	0	1
B3	2	1	1	2	2	0	1	1	0
SNF	2	2	0	0	0	0	0	0	0
ARR-B	1	1	0	1	0	1	0	0	0
LSD one like	0	0	0	1	0	1	0	0	0
