# Supplementary material for: Comparative Transcriptomic Analysis Provides Novel Insights into the Blanched Stem of Oenanthe javanica
Source: Plants (Basel). 2021 Nov 17;10(11):2484. doi: 10.3390/plants10112484 (PMC8625949; doi:10.3390/plants10112484)
Supplement: Supplementary file 1 [file plants-10-02484-s001.zip › Supplemntray table 4 GO ..xlsx]

## Sheet: Sheet1
List of 25 enriched biological processes in GO analysis with the higher number of DEGs in the stem of water dropwort under blanching conditions
Biological Process	GO IDs	All DEGs			Upregulated DEGs			Downregulated DEGs
		Pre vs Mid	Pre vs Post	Pre vs Control	Pre vs Mid	Pre vs Post	Pre vs Control	Pre vs Mid	Pre vs Post	Pre vs Control
Metabolic process	(GO:0008152)	736	1263	481	270	506	177	466	757	304
Cellular process	(GO:0009987)	671	1180	437	261	482	145	410	698	292
Oxidation-reduction process	(GO:0055114)	151	248	98	39	99	29	112	149	69
Transport	(GO:0006810)	111	241	92	60	95	17	51	146	75
Phosphorylation	(GO:0016310)	126	186	67	75	70	13	51	116	54
Carbohydrate metabolic process	(GO:0005975)	88	135	71	35	43	19	53	92	52
Response to stress	(GO:0006950)	74	119	45	32	53	10	42	66	35
Protein phosphorylation	(GO:0006468)	93	118	45	53	41	7	40	77	38
Transcription, DNA-templated	(GO:0006351)	71	118	72	30	66	36	41	52	36
Regulation of transcription, DNA-templated	(GO:0006355)	56	86	54	25	48	28	31	38	26
Proteolysis	(GO:0006508)	37	81	21	8	16	8	21	59	13
Translation	(GO:0006412)	39	81	20	7	20	17	32	61	3
Photosynthesis	(GO:0015979)	59	69	8	0	1	2	59	68	6
Transmembrane transport	(GO:0055085)	53	67	54	22	43	6	31	86	48
Protein folding	(GO:0006457)	23	51	8	5	25	6	18	26	2
Dephosphorylation	(GO:0016311)	24	45	15	13	19	5	11	26	10
Methylation	(GO:0032259)	20	38	13	6	17	5	14	21	8
Response to light stimulus	(GO:0009416)	31	33	12	5	10	6	26	23	6
Protein ubiquitination	(GO:0016567)	6	30	14	4	20	1	2	10	13
Response to oxidative stress	(GO:0006979)	21	26	8	7	5	1	14	21	7
Protein-chromophore linkage	(GO:0018298)	17	21	1	0	0	0	17	21	1
Cell redox homeostasis	(GO:0045454)	15	20	6	7	11	3	8	9	3
Protein peptidyl-prolyl isomerization	(GO:0000413)	8	20	2	0	8	2	8	12	0
Photosynthesis, light harvesting in photosystem I	(GO:0009768)	12	11	1	0	0	0	12	11	1
Chlorophyll biosynthetic process	(GO:0015995)	8	13	2	3	4	0	8	13	2
