# Supplementary material for: Comparative Transcriptomic Analysis Provides Novel Insights into the Blanched Stem of Oenanthe javanica
Source: Plants (Basel). 2021 Nov 17;10(11):2484. doi: 10.3390/plants10112484 (PMC8625949; doi:10.3390/plants10112484)
Supplement: Supplementary file 1 [file plants-10-02484-s001.zip › Suppplemenatry table 1 PCR primers.xlsx]

## Sheet: Sheet1
Gene name	Sequence
c41123.graph_c0 (Actin)
Forward primer	TTGAGCGGAGGGAGTACTAT
Reverse primer	GCGATGCCTTCTTCCAAATA
c45975.graph_c0 (Inositol oxygenase 4, MIOX4)
Forward primer	GCCAAAGAAAACGGGACTAC
Reverse primer	CAACTCGGACTTTGCTCTTG
c40818.graph_c0 (Chlorophyll a-b binding protein 4, Lhca4)
Forward primer	AGGTGGCAAGACATCAAGAA
Reverse primer	CATTGCCAGTCTCCCATTTG
c41978.graph_c0 (Photosystem I subunit O, PsaO)
Forward primer	GCAGCAACATCCTCCATTTT
Reverse primer	CCCTATCAGTCCAAAACCGA
c48821.graph_c0 (Shikimate O-hydroxycinnamoyltransferase)
Forward primer	TTATATTCACTGCCACGCCT
Reverse primer	CAAGGTTTGGGCACTGAAAA
c47351.graph_c0 (Cytochrome P450 98A2, CYP98A2)
Forward primer	TCGAATCTCCCCTACCTTCA
Reverse primer	GACGAAAATCATGCCCCTTC
c48260.graph_c0 (Zeaxanthin epoxidase)
Forward primer	TTTGGGTGTAGGACTTGGTC
Reverse primer	ACTGTTGGCTCTGTCAGAAA
c48952.graph_c0 (Cytokinin dehydrogenase 6, CKX6)
Forward primer	GATGGACACCTCAGTTTTGC
Reverse primer	CCTGACCATGAAGTGAGTGA
c36398.graph_c0 (Abscisic acid 8&apos;-hydroxylase 4, CYP707A)
Forward primer	TTGTGCTAGTGACTCATGCT
Reverse primer	GGTGTTAGTGACTCGTGACT
c40854.graph_c0 (Ethylene-responsive transcription factor 3, ERF3)
Forward primer	GGCCAGCCGATTTATGTTTT
Reverse primer	GGGAGGCAAGTTTAGATCGA
c49329.graph_c0 (Ribose-5-phosphate isomerase)
Forward primer	AGGTTGTGCAGTTTTGTTGG
Reverse primer	GCAATAATAACCGCAGTCGT
c33577.graph_c0 (Auxin-responsive protein, IAA17)
Forward primer	AATGAAAAGGGTCGAGTGGT
Reverse primer	TGTCCCATTCACAACATCCA
c44466.graph_c0 (Ribulose bisphosphate carboxylase small chain, RBCS1)
Forward primer	AGTCTATCGCATCATTCCCG
Reverse primer	GCGGAGAAGGTAGTCAACTT
c28052.graph_c0 (MYB2)
Forward primer	GGGTTGGGGAGTGATAGAAG
Reverse primer	CTCTCTTCAAGTCCGGTCTC
c52749.graph_c1 (Phytochrome A, Phya)
Forward primer	ATGGAAGAAAGATGCACCCA
Reverse primer	TAGCTCCTGTATCCCATCGA
c41312.graph_c0 (Chlorophyll a-b binding protein CP26, Lhcb5)
Forward primer	GAAGTTCCCGGAGACTATGG
Reverse primer	GAACCAAACAGCTTCAGGTC
